# Supplementary material for: Endothelial heterogeneity across distinct vascular beds during homeostasis and inflammation
Source: eLife journal article supplement (doi:10.7554/elife.51413), 2020-01-16
Supplement: supp [file elife-51413-supp-v1.zip]

Archive with 18 entries (18 files):
- elife_poa_e51413_Figure_8_figure_supplement_1.pdf
- elife_poa_e51413_Supplementary_file_7.xlsx
- elife_poa_e51413_Figure_1_figure_supplement_5.pdf
- elife_poa_e51413_Figure_1_figure_supplement_4.pdf
- elife_poa_e51413_Supplementary_file_3.xlsx
- elife_poa_e51413_Supplementary_file_9.xlsx
- elife_poa_e51413_Figure_6_figure_supplement_1.pdf
- elife_poa_e51413_Figure_1_figure_supplement_2.pdf
- elife_poa_e51413_Figure_1_figure_supplement_3.pdf
- elife_poa_e51413_Supplementary_file_2.xlsx
- elife_poa_e51413_Supplementary_file_1.xlsx
- elife_poa_e51413_Figure_1_figure_supplement_1.pdf
- elife_poa_e51413_Figure_9_figure_supplement_1.pdf
- elife_poa_e51413_Supplementary_file_8.xlsx
- elife_poa_e51413_Supplementary_file_5.xlsx
- elife_poa_e51413_Transparent_Reporting_File.docx
- elife_poa_e51413_Supplementary_file_4.xlsx
- elife_poa_e51413_Supplementary_file_6.xlsx
