# Supplementary material for: Endothelial heterogeneity across distinct vascular beds during homeostasis and inflammation
Source: eLife journal article supplement (doi:10.7554/elife.51413), 2020-01-16
Supplement: supp [file elife-51413-supp-v1.zip › elife_poa_e51413_Figure_1_figure_supplement_2.pdf]

A

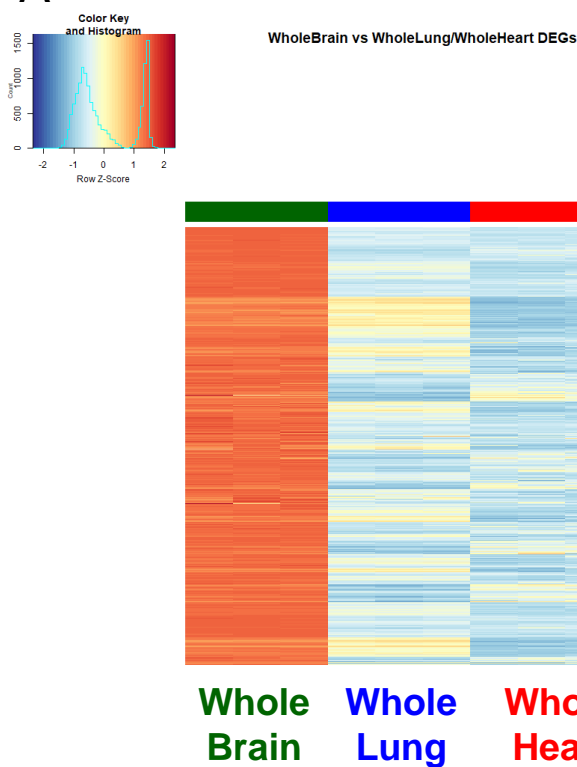

B

Figure 1 – Figure Supplement 2

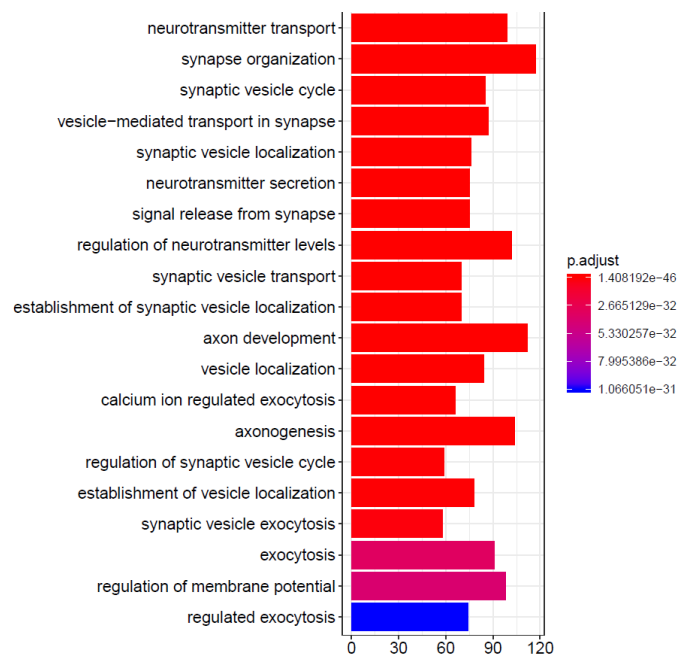

C

| Most abundant whole brain genes |                                                                     |
|---------------------------------|---------------------------------------------------------------------|
| Mbp                             | Myelin Basic Protein                                                |
| Plp1                            | Proteolipid Protein 1                                               |
| Calm1                           | Calmodulin 1                                                        |
| Snap25                          | Synaptosome Associated Protein 25                                   |
| Kif5a                           | Kinesin Family Member 5A                                            |
| Atp1a3                          | ATPase Na <sup>+</sup> /K <sup>+</sup> Transporting Subunit Alpha 3 |
| Slc1a2                          | Sodium-Dependent Glutamate/Aspartate Transporter 2                  |
| Sparcl1                         | Secreted Protein Acidic And Cysteine Rich                           |
| Cpe                             | Carboxypeptidase E                                                  |
| Scd2                            | stearoyl-CoA desaturase 2                                           |
