# Supplementary material for: Endothelial heterogeneity across distinct vascular beds during homeostasis and inflammation
Source: eLife journal article supplement (doi:10.7554/elife.51413), 2020-01-16
Supplement: supp [file elife-51413-supp-v1.zip › elife_poa_e51413_Figure_1_figure_supplement_3.pdf]

A

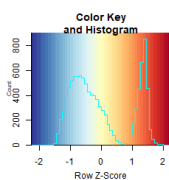

WholeLung vs WholeBrain/WholeHeart DEGs

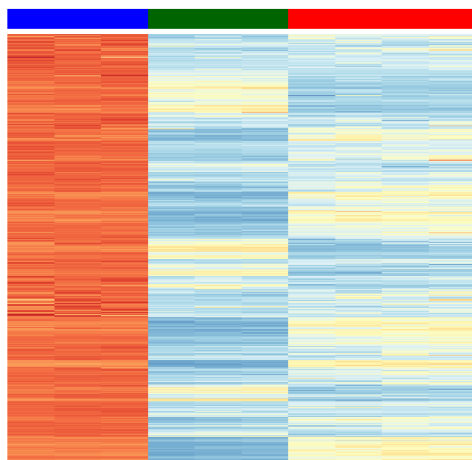Whole  
LungWhole  
BrainWhole  
Heart

B

Figure 1 – Figure Supplement 3

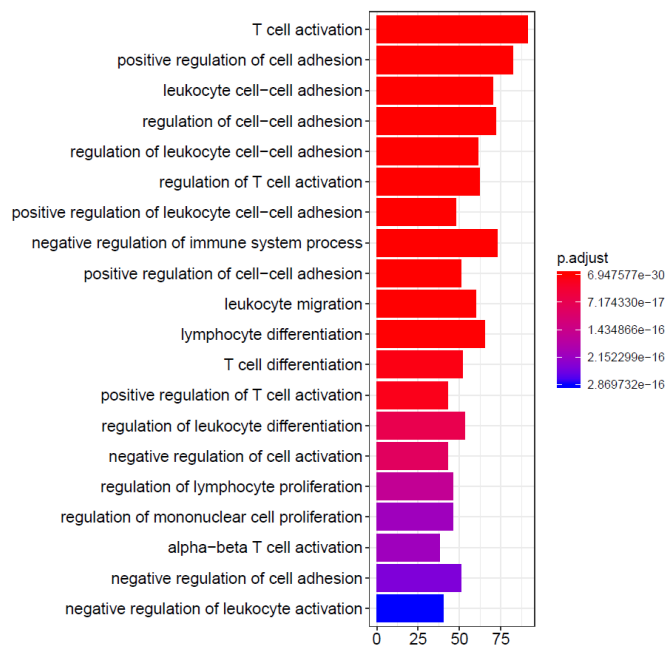

C

| Most abundant whole lung genes |                                         |
|--------------------------------|-----------------------------------------|
| Ahnak                          | Desmoyokin                              |
| Macf1                          | Microtubule-Actin Crosslinking Factor 1 |
| Actb                           | Actin Beta                              |
| Sftpc                          | Surfactant Protein C                    |
| Sptbn1                         | Spectrin Beta, Non-Erythrocytic 1       |
| Epas1                          | HIF2α                                   |
| Scd1                           | Stearoyl-CoA Desaturase                 |
| Flna                           | Filamin A                               |
| Adgrf5                         | Adhesion G Protein-Coupled Receptor F5  |
| Lrp1                           | LDL Receptor Related Protein 1          |
