# Supplementary material for: Endothelial heterogeneity across distinct vascular beds during homeostasis and inflammation
Source: eLife journal article supplement (doi:10.7554/elife.51413), 2020-01-16
Supplement: supp [file elife-51413-supp-v1.zip › elife_poa_e51413_Figure_1_figure_supplement_4.pdf]

A

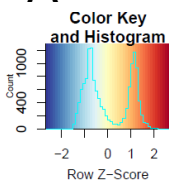

### WholeHeart vs WholeBrain/WholeLung DEGs

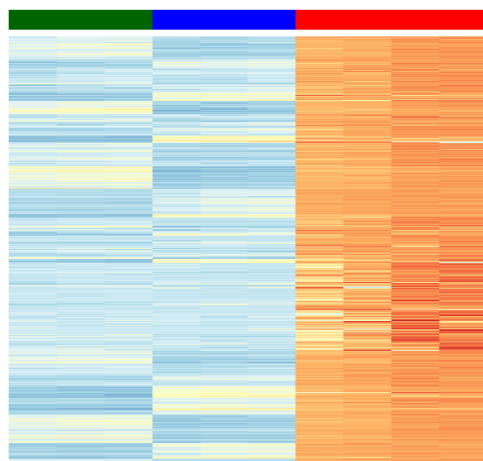

Whole Lung    Whole Brain    Whole Heart

B

### Figure 1 – Figure Supplement 4

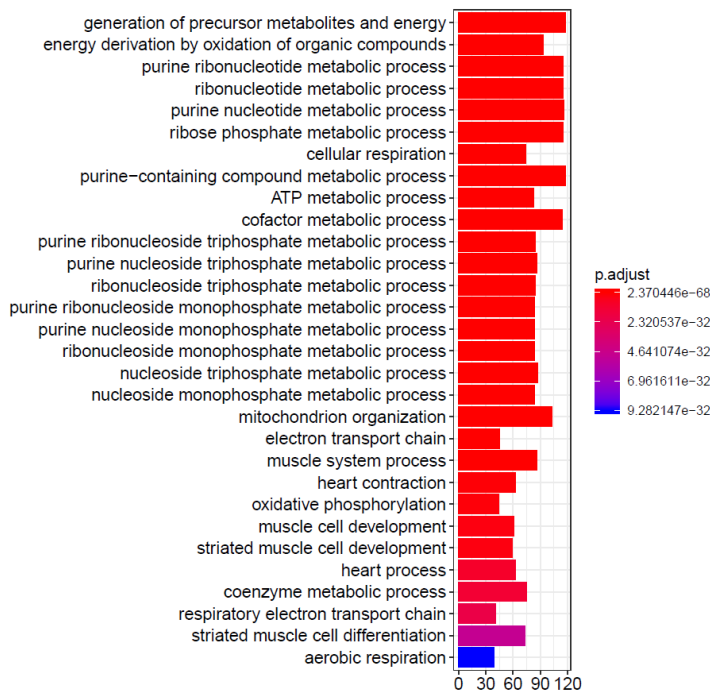

C

| Most abundant whole heart genes |                                                                                    |
|---------------------------------|------------------------------------------------------------------------------------|
| Myh6                            | Myosin Heavy Chain 6                                                               |
| Atp2a2                          | ATPase<br>sarcoplasmic/endoplasmic<br>reticulum Ca <sup>2+</sup> transporting<br>2 |
| Mb                              | Myoglobin                                                                          |
| Actc1                           | Actin, Alpha, Cardiac Muscle<br>1                                                  |
| Pln                             | Phospholamban                                                                      |
| Myl2                            | Myosin regulatory light chain<br>2                                                 |
| Ttn                             | Titin                                                                              |
| Tnnt2                           | Troponin T2, Cardiac Type                                                          |
| Tpm1                            | Tropomyosin 1                                                                      |
| Lpl                             | Lipoprotein Lipase                                                                 |
