# Supplementary material for: Endothelial heterogeneity across distinct vascular beds during homeostasis and inflammation
Source: eLife journal article supplement (doi:10.7554/elife.51413), 2020-01-16

**A**  
**Brain EC Expression Correlation  
(All Genes)**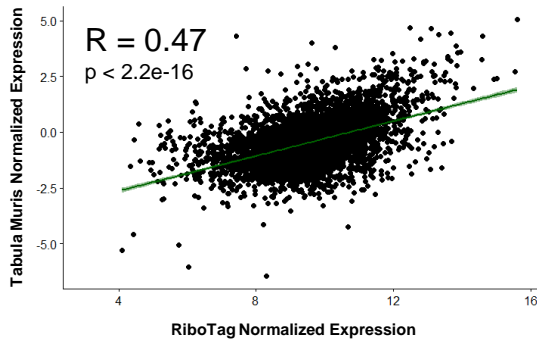**B**  
**Brain EC Expression Correlation  
(Parenchymal DEGs)**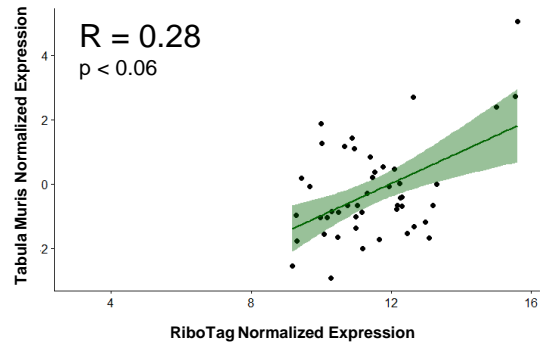**C**  
**Lung EC Expression Correlation  
(All Genes)**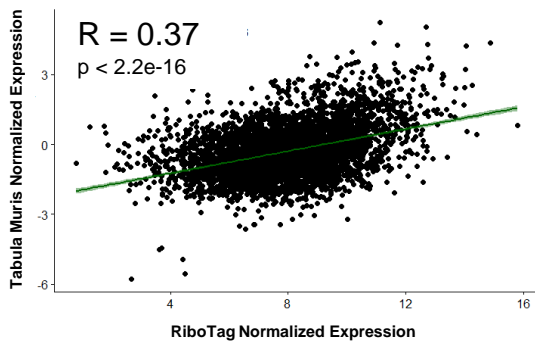**D**  
**Lung EC Expression Correlation  
(Parenchymal DEGs)**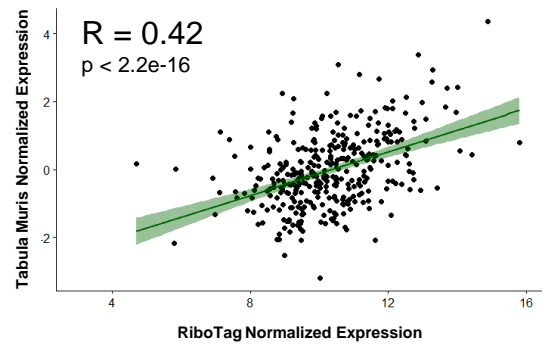

Supplement: supp [file elife-51413-supp-v1.zip › elife_poa_e51413_Figure_6_figure_supplement_1.pdf]
