# Supplementary material for: Endothelial heterogeneity across distinct vascular beds during homeostasis and inflammation
Source: eLife journal article supplement (doi:10.7554/elife.51413), 2020-01-16
Supplement: supp [file elife-51413-supp-v1.zip › elife_poa_e51413_Figure_8_figure_supplement_1.pdf]

Figure 8 – Figure Supplement 1

A

| Top RiboTag Brain EC<br>Early Inflammatory Markers |                                          |
|----------------------------------------------------|------------------------------------------|
| Timp1                                              | TIMP metalloproteinase inhibitor 1       |
| Ccl11                                              | C-C motif chemokine 11                   |
| Serpina3n                                          | Alpha 1-antichymotrypsin                 |
| Acod1                                              | Aconitate Decarboxylase                  |
| C3                                                 | Complement C3                            |
| Tnf                                                | Tumor Necrosis Factor                    |
| Il6                                                | Interleukin 6                            |
| Il1rn                                              | Interleukin 1 Receptor Accessory Protein |
| Il1b                                               | Interleukin 1 beta                       |
| Il1a                                               | Interleukin 1 alpha                      |

B

| Top RiboTag Lung EC<br>Early Inflammatory Markers |                                          |
|---------------------------------------------------|------------------------------------------|
| Gata3                                             | GATA Binding Protein                     |
| Ptgis                                             | Prostaglandin I2 Synthase                |
| Wfdc1                                             | WAP four-disulfide core domain protein 1 |
| Ly96                                              | Lymphocyte antigen 96                    |
| Il1r2                                             | Interleukin 1 receptor, type II          |
| Casp6                                             | Caspase-6                                |
| Ctnnbip1                                          | Beta-catenin-interacting protein 1       |
| Cxcl1                                             | chemokine (C-X-C motif) ligand 1         |
| Cxcl9                                             | Chemokine (C-X-C motif) ligand 9         |
| Saa3                                              | Serum amyloid A                          |

C

| Top RiboTag Heart EC<br>Early Inflammatory Markers |                                    |
|----------------------------------------------------|------------------------------------|
| Ccl3                                               | Chemokine (C-C motif) ligand 3     |
| Timp1                                              | TIMP metalloproteinase inhibitor 1 |
| Acod1                                              | Aconitate Decarboxylase            |
| Il6                                                | Interleukin 6                      |
| Selp                                               | P-selectin                         |
| Sele                                               | E-selectin                         |
| Il1rn                                              | Interleukin 1 Receptor Antagonist  |
| Tspan2                                             | Tetraspanin-2                      |
| Cxcl5                                              | C-X-C motif chemokine 5            |
| Cxcl1                                              | C-X-C motif chemokine 1            |

D

| Top RiboTag Brain EC<br>Late Inflammatory Markers |                                           |
|---------------------------------------------------|-------------------------------------------|
| Ccl3                                              | Chemokine (C-C motif) ligand 3            |
| Timp1                                             | TIMP metalloproteinase inhibitor 1        |
| Ccl11                                             | Chemokine (C-C motif) ligand 11           |
| Serpina3n                                         | Alpha 1-antichymotrypsin                  |
| Acod1                                             | Aconitate Decarboxylase                   |
| C3                                                | Complement C3                             |
| Il6                                               | Interleukin 6                             |
| Il18rap                                           | Interleukin 18 receptor accessory protein |
| Selp                                              | P-selectin                                |
| Sele                                              | E-selectin                                |

E

| Top RiboTag Lung EC<br>Late Inflammatory Markers |                                            |
|--------------------------------------------------|--------------------------------------------|
| Mmp8                                             | Neutrophil collagenase                     |
| Il10                                             | human cytokine synthesis inhibitory factor |
| Acod1                                            | Aconitate Decarboxylase                    |
| Mefv                                             | pyrin innate immunity regulator            |
| Wfdc1                                            | WAP four-disulfide core domain protein 1   |
| Pla2g7                                           | platelet-activating factor acetylhydrolase |
| Il1r2                                            | Interleukin 1 receptor                     |
| Il1rn                                            | interleukin-1 receptor antagonist          |
| Cxcl9                                            | Chemokine (C-X-C motif) ligand 9           |
| Siglece                                          | sialic acid binding Ig-like lectin E       |

F

| Top RiboTag Heart EC<br>Late Inflammatory Markers |                                              |
|---------------------------------------------------|----------------------------------------------|
| Serpina3n                                         | Alpha 1-antichymotrypsin                     |
| Itih4                                             | Inter-alpha-trypsin inhibitor heavy chain H4 |
| Acod1                                             | Aconitate Decarboxylase                      |
| Apod                                              | Apolipoprotein D                             |
| Il6                                               | Interleukin 6                                |
| Selp                                              | P-selectin                                   |
| Sele                                              | E-selectin                                   |
| Il1rn                                             | Interleukin 1 Receptor Antagonist            |
| Cxcl5                                             | C-X-C motif chemokine 5                      |
| Cxcl3                                             | C-X-C motif chemokine 3                      |
