# Supplementary material for: Endothelial heterogeneity across distinct vascular beds during homeostasis and inflammation
Source: eLife journal article supplement (doi:10.7554/elife.51413), 2020-01-16

A

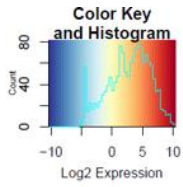

## Brain EC-specific Glycolysis Genes

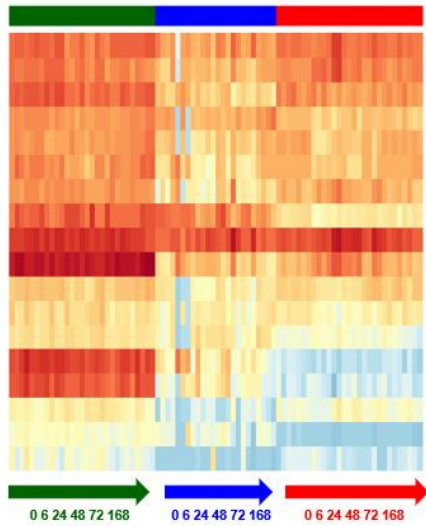

B

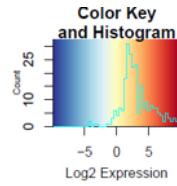

## Lung EC-specific Glycolysis Genes

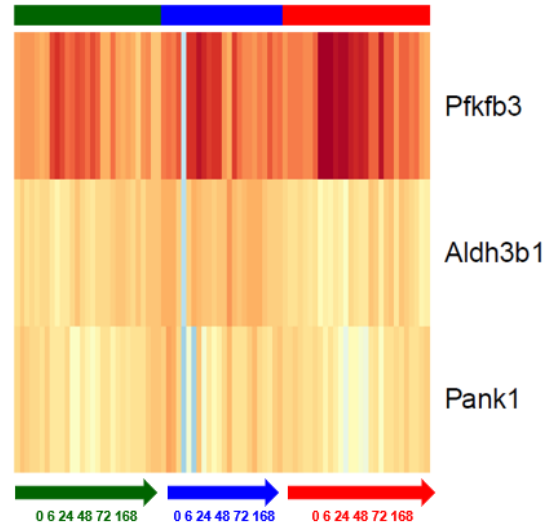

C

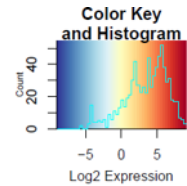

## Heart EC-specific Glycolysis Genes

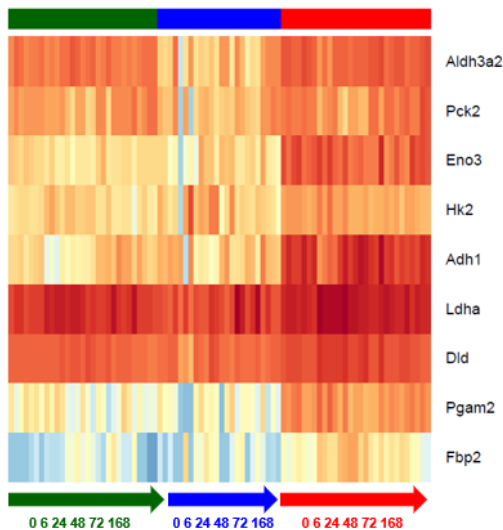

Supplement: supp [file elife-51413-supp-v1.zip › elife_poa_e51413_Figure_9_figure_supplement_1.pdf]
