# Supplementary material for: Endothelial heterogeneity across distinct vascular beds during homeostasis and inflammation
Source: eLife journal article supplement (doi:10.7554/elife.51413), 2020-01-16
Supplement: supp [file elife-51413-supp-v1.zip › elife_poa_e51413_Supplementary_file_1.xlsx]

## Sheet: Most LogFC Ribotag Brain EC gen
	0B1_S	0B2_S	0B_S	0B_S.1	0B6_	0B7_	0L2_S	0La_S	0L6_	0L7_	0H1_S	0H2_S	0H_S	0H_S.1	0H6_	0H7_
Ptgds	16.0816	15.0545	13.9847	13.9626	14.8416	15.2434	3.2952	1.36996	3.07044	2.47297	5.06198	4.34262	4.85129	5.11388	5.06976	3.60512
Atp1a2	14.2392	13.1718	13.0862	13.0767	13.5519	14.229	8.60744	6.12629	9.57179	9.49548	7.30108	7.39155	7.94498	8.07328	6.99558	7.14138
Bsg	12.0004	12.7124	11.9217	11.9058	11.8531	12.2878	9.8362	8.88503	9.60301	9.37489	9.01853	9.1991	9.38281	9.37452	9.23183	8.95884
Apoe	12.0101	11.6072	11.5193	11.5001	12.0536	12.5271	6.56795	7.13987	7.03751	6.7236	8.30585	8.81531	9.35874	9.38221	9.72695	9.21338
Glul	12.1426	11.6225	11.0007	10.9695	11.4791	11.3754	9.3406	10.4402	8.98285	9.38817	8.40907	8.54559	8.6102	8.55387	8.60484	8.64176
Apod	12.1279	11.3742	10.4399	10.4413	11.1635	11.5304	2.11398	2.19567	2.78219	2.26109	3.03953	2.2613	3.37176	3.14381	2.71017	3.06914
Ptn	12.0153	11.5953	10.2502	10.2485	10.3957	11.0821	2.23904	2.51335	1.58073	1.59655	4.20131	4.07162	4.39469	4.35277	3.91044	4.32823
Igf2	12.1221	11.803	9.21585	9.16745	9.88787	10.7975	3.11112	2.96212	1.93975	1.96007	7.72448	7.68676	8.59643	8.59417	8.3832	9.1252
Spock2	10.8231	11.203	10.9903	10.9797	10.5306	11.0347	5.93463	5.79075	6.27204	6.6922	6.30442	6.24211	6.2217	6.11213	6.75674	7.25135
Slc2a1	11.305	11.1662	10.1617	10.1483	10.2678	10.6034	3.60505	4.0721	3.02622	2.57266	5.08357	4.46422	4.32797	4.30176	4.77272	4.35433
Cpe	9.66873	9.82018	11.142	11.1419	11.4357	11.2874	8.3853	7.61836	9.01242	8.78815	8.70871	8.8008	9.15674	9.13022	9.25159	9.11666
Plp1	8.52119	9.13995	11.2568	11.2431	10.938	11.8141	3.97233	2.02156	4.84643	3.81492	2.06801	2.1126	2.27168	2.69432	1.82351	1.92982
Snap25	9.40273	10.0311	10.4229	10.4492	10.6851	11.3218	1.6567	1.04532	3.155	1.89152	1.05502	0.98333	1.04793	1.14641	1.09577	1.13553
Vtn	11.0574	10.3033	9.93982	9.94484	10.4637	10.491	2.90007	2.35102	2.96507	4.05008	2.1684	2.20365	2.73108	2.9365	2.23302	2.0108
Mbp	8.51544	9.11722	10.6762	10.6714	10.7489	10.8553	3.40605	2.9781	4.50894	3.54725	1.42338	1.67709	2.00506	2.26792	1.57461	1.72108
Nnat	11.3472	10.2105	9.29841	9.26718	10.0671	10.197	4.60404	1.7877	3.7244	3.00131	1.25093	1.11426	1.01599	1.42591	1.06847	1.08656
Atp1b1	9.55102	9.51296	10.1297	10.0335	10.39	10.4974	5.41758	6.20818	5.88533	5.36048	4.99975	5.21328	5.65443	5.65089	5.09872	4.9255
Slc1a2	7.73699	8.53902	10.9605	10.952	11.3845	9.49421	0.98333	0.98333	2.44419	1.33266	1.05502	1.05028	1.22599	0.98333	1.17469	1.31631
Sptbn2	8.29538	9.06583	11.1159	11.0967	11.927	7.30102	3.11112	3.71012	2.2007	3.13185	3.85474	3.94539	3.17612	3.3587	3.49457	3.28528
Myo5a	10.3042	10.7564	9.77198	9.81137	10.508	7.43624	5.49486	4.9648	5.27581	5.38437	3.83451	3.78757	3.81387	3.63083	3.47911	3.6813
Camk2n1	9.05923	9.05171	9.97734	9.91905	10.3225	10.2567	5.92535	6.39089	6.39305	6.49666	5.14235	5.59595	5.69911	5.47787	5.78288	5.78587
Ndrg4	8.58179	9.03374	10.1408	10.1207	10.2277	10.2673	2.65276	1.99039	1.62093	2.06339	4.98606	5.35574	5.38272	5.63036	4.79994	4.73209
Syp	8.02869	8.58233	10.0001	10.0443	10.316	10.6527	3.73814	3.00954	3.98529	3.59546	3.60297	3.93657	3.04774	3.71121	3.65916	3.19576
Scd2	8.57588	9.51935	9.87563	9.81712	10.0351	9.60693	9.13369	7.77921	7.64507	8.32189	5.95915	6.74226	6.85184	6.73226	6.96445	7.15407
Ckb	8.77738	8.77777	9.91153	9.8946	9.77956	10.0174	9.01956	5.80426	8.58429	8.27389	5.1749	6.09131	5.39209	5.53787	6.48011	5.50992
Atp1a3	7.63766	8.56049	10.0114	10.0012	10.338	10.4836	1.24427	1.63479	3.05585	2.29333	0.98333	0.98333	1.04793	1.14641	1.06847	1.08656
Kif5a	8.77085	9.36451	9.64969	9.55747	9.81909	9.7787	1.82575	1.16184	2.94937	1.52595	1.18853	1.05028	1.1397	1.29292	1.29734	1.08656
Ndrg2	9.08829	8.63487	9.5139	9.54644	9.9361	9.59217	6.00676	4.94054	6.62692	6.86304	7.05119	7.51223	7.71131	7.85918	7.07746	6.70254
Vamp2	8.70562	8.73454	9.5251	9.51564	9.82716	9.79236	6.8682	7.58418	7.23254	7.9933	6.35145	6.28791	6.59171	6.59069	6.41319	6.5117
Prnp	8.84705	8.81687	9.34433	9.36045	9.75672	9.96232	5.9621	5.38607	5.46437	4.60672	7.4119	6.96464	7.51784	7.54691	7.44825	7.21621
Tubb4a	7.61095	8.37158	9.81715	9.75056	9.88953	10.6098	4.32248	2.37536	4.1035	5.28633	1.52787	1.29075	1.38447	1.29292	1.17469	1.27319
Atp1b2	9.45731	9.08316	9.17697	9.16805	9.54859	9.46412	3.04414	2.16808	3.04111	3.48348	3.85474	4.94076	4.60251	4.96883	4.37891	4.25533
Nrgn	7.52934	8.10218	9.84949	9.81099	10.1662	10.3951	4.71585	1.82352	5.26951	4.64262	1.92226	2.31674	2.817	2.84445	2.41742	2.70554
Camk2a	8.078	8.83147	9.65932	9.68749	10.015	9.37697	2.55992	1.36996	1.66004	1.54392	3.07446	3.11177	3.32691	3.42376	3.2793	3.47322
Ywhag	8.60441	8.81052	9.39868	9.28499	9.66315	9.84615	6.43047	8.15191	6.36077	6.49781	7.4042	7.29651	7.24399	7.20214	7.34004	7.17068
Cplx2	8.16661	8.6783	9.46679	9.49713	9.6619	9.95726	5.55624	4.55481	7.35229	6.84819	5.83481	6.01165	5.96681	6.09225	5.77973	5.91508
Aldoc	7.73204	8.43596	9.70857	9.6833	10.0762	9.75385	3.8205	1.82352	3.28578	2.08811	1.05502	1.17552	1.22599	1.42591	1.14886	1.08656
Aplp1	7.29822	8.00193	9.80029	9.79553	10.0426	10.3805	1.82575	3.7847	2.69073	2.41554	3.88457	3.83581	3.56072	3.85968	3.77346	3.70583
Snhg11	8.2629	8.58436	10.4973	10.5301	9.86753	7.47279	5.91602	2.32626	4.17948	3.8406	1.18853	0.98333	0.98333	1.14641	1.06847	1.03587
Pcp4l1	9.20515	9.96877	8.83294	8.85051	8.75923	9.4188	5.59185	6.58339	4.99147	4.91717	5.88732	6.67225	6.59644	6.60829	6.15061	6.00759
Slco1a4	9.54014	9.94052	9.28615	9.29217	8.11758	8.84996	0.98333	1.26965	1.15741	1.03509	2.72478	2.58857	3.3463	3.21905	3.142	3.82631
Mal	9.5652	9.61333	8.63851	8.58437	8.97741	9.49596	2.90007	3.35376	2.79981	1.43254	4.80036	4.67512	5.15973	5.27242	5.31014	5.59116
Slco1c1	9.19825	9.68004	9.10221	9.08786	8.48647	8.8427	0.98333	1.04532	1.49681	1.03509	1.31073	1.17552	1.22599	1.29292	1.29734	1.1594
Igfbp2	9.91165	9.61532	8.21563	8.12187	9.01998	9.28949	8.38191	4.46694	8.13468	7.70655	1.12332	1.17552	1.04793	1.14641	0.98333	1.00984
Gprasp1	8.94685	9.21853	9.20623	9.16985	9.60993	7.99502	7.54377	5.54471	8.06218	7.89123	4.53171	4.85909	4.6052	4.52574	4.95146	4.85048
Ank2	8.74476	9.16752	9.11171	9.10237	9.34347	8.58918	3.65079	1.82352	3.99297	3.06494	3.90411	4.20982	4.35694	3.99428	3.73056	3.6977
Ppp3r1	8.47835	8.71706	9.01288	9.00428	9.11619	9.55659	4.77901	7.23936	5.29768	5.22497	7.24279	7.16768	7.15147	7.11372	7.2695	7.34899
Gpm6b	7.52199	8.02603	9.70635	9.77598	9.70069	9.11746	4.17376	3.65153	4.14544	4.40266	1.67165	2.17393	2.67083	2.46626	2.24527	2.56066
Gpm6a	7.8832	8.46527	9.418	9.44013	9.3552	9.25726	5.45674	4.66257	4.92077	4.31639	5.57312	5.58471	6.34009	6.4455	6.32511	6.6826
Rtn1	7.50053	8.06824	9.37959	9.38027	9.39703	9.91094	5.48227	4.05713	4.93678	5.194	4.78989	4.4015	4.84448	4.79529	4.57594	4.38756
Map2	7.7601	8.12467	9.54192	9.5147	9.58824	9.06123	1.82575	1.59389	2.61314	1.24746	1.36815	1.17552	1.61515	1.54767	1.47417	1.41877
Kif1a	7.99249	8.61713	9.33039	9.32645	9.60408	8.68562	2.23904	1.95852	2.61314	1.89152	1.25093	1.17552	1.30741	0.98333	1.17469	1.03587
Fmod	10.446	9.7644	7.5999	7.51271	8.67488	9.22182	1.46517	1.41761	2.42161	1.64732	1.52787	1.44799	2.46149	2.0379	1.80709	2.35892
Pglyrp1	8.88067	9.02554	8.60926	8.58257	8.67157	9.40577	3.55782	3.2123	3.75181	3.07734	2.83071	2.34368	2.86261	2.19524	1.9183	2.52434
Syt1	7.69328	8.2257	9.07087	9.03092	9.26736	9.65502	1.46517	1.10476	1.45295	1.68021	1.05502	0.98333	1.07917	0.98333	1.01227	1.00984
Olfm1	7.65195	7.81974	9.16605	9.10426	9.49385	9.70229	6.01553	5.68032	5.66032	6.29316	3.9234	4.04724	4.41931	4.54049	3.94463	4.30434
Nbl1	9.82	9.03275	8.05138	8.07912	8.69035	8.98359	6.88265	5.94303	7.31219	6.87418	4.8913	4.62659	4.44952	4.35277	4.36496	4.81146
Dlgap1	7.80591	8.34627	9.16847	9.11737	9.54408	8.63511	1.82575	1.04532	1.97119	1.08506	1.18853	1.11426	1.10976	0.98333	1.12256	1.06143
Eno2	7.70704	8.1427	8.99752	9.08022	9.24092	9.38339	1.24427	1.41761	2.83441	1.77458	0.98333	1.23429	1.22599	1.76411	1.14886	1.06143
Kif5c	7.35175	7.96604	9.26507	9.27444	9.43889	9.23461	4.53253	2.92961	4.80777	4.13851	1.80239	2.04854	1.88642	2.46626	2.31661	1.85869
Chn1	7.46688	7.85099	9.13348	9.13835	9.26718	9.62001	2.9739	3.25227	2.59307	2.5372	3.43846	3.42094	3.98448	3.85968	3.2185	3.70583
Gjb6	9.72498	9.05122	7.87535	7.97458	8.67157	8.98661	3.04414	1.8926	1.93975	1.80472	0.98333	0.98333	1.01599	1.14641	0.98333	0.98333
Syt11	7.33226	7.82088	9.19032	9.12481	9.24908	9.36165	5.8587	5.20101	6.73618	5.79887	4.45427	4.30199	4.34414	4.43397	4.45467	4.21032
Ahcyl1	8.96866	8.59515	8.53559	8.56171	8.65813	8.68443	5.24939	6.29527	5.17479	5.62188	6.95256	6.70379	7.02028	6.94944	7.03578	6.94975
Vsnl1	7.46943	7.98717	8.82273	8.78472	8.97328	9.73507	2.35411	2.37536	3.23488	2.77648	1.12332	1.05028	1.01599	1.54767	1.06847	1.00984
Ndrg3	8.16242	8.16368	8.69191	8.74344	8.83486	9.06052	5.56821	5.9812	5.18488	5.79136	5.63584	5.88899	5.90167	6.0099	5.85954	5.73415
Map1a	7.15975	7.68051	9.20173	9.13835	9.23785	9.16205	2.74	2.49125	2.39867	2.42527	2.98551	2.83631	3.10199	3.06442	2.53178	2.9781
Ttc3	7.99426	8.27682	8.76262	8.76423	8.82857	8.83971	6.8682	6.10097	6.06727	6.82541	6.13694	6.22952	6.07926	6.06192	6.09335	6.21405
Mobp	7.3049	7.59581	9.19213	9.18535	9.12357	9.01156	1.6567	0.98333	2.14665	1.52595	1.05502	0.98333	1.10976	0.98333	1.14886	1.206
Enpp2	8.10724	7.9624	8.71435	8.70838	8.74278	9.00752	6.35648	5.92872	5.8456	6.29647	3.88457	3.71721	4.25117	4.13692	4.10772	4.42989
Itm2a	9.72409	10.3423	8.16432	8.10568	7.17276	7.58663	2.46068	1.36996	1.53938	2.06339	4.27072	4.77746	5.36223	5.24568	4.59281	4.97342
Myh10	9.50513	9.76917	8.33049	8.312	9.18498	5.92981	3.89841	7.03588	4.15231	4.13259	5.28336	5.34578	5.03779	4.87888	5.26576	5.5657
Ncdn	7.22361	7.85884	8.86657	8.84601	9.06164	9.17452	6.02424	5.01988	5.98303	5.75034	4.92518	4.84501	4.80531	4.56953	4.89236	4.80957
Slc17a7	7.19512	7.53271	8.83367	8.77214	9.18614	9.3023	2.46068	1.41761	1.90761	1.41311	2.20038	2.49554	2.18817	2.46626	2.71898	2.12433
Stxbp1	7.62474	8.03893	8.63267	8.65458	8.77576	9.02172	5.54417	7.34404	5.64335	6.32599	6.40731	6.15733	6.01608	5.94489	6.17801	6.15218
Camk2b	7.37098	7.92122	8.82404	8.84826	8.81751	8.8062	5.23444	4.61226	6.01731	4.71383	5.04887	4.57636	4.61855	4.44968	5.3116	3.91313
Zwint	7.62245	7.72842	8.57993	8.49535	8.89708	9.2357	6.18832	7.08467	6.78232	7.04051	5.90924	5.94504	5.69911	5.63036	5.86351	5.62906
Gabbr1	7.12565	7.48713	8.88127	8.89976	9.09124	9.05073	6.0329	4.67242	5.06616	4.98782	4.21703	4.36251	4.30503	4.36938	4.08406	4.4421
Tspan3	8.26437	7.89256	8.46773	8.40353	8.67681	8.55361	4.20475	5.89334	3.88982	4.29531	5.97772	6.24747	6.32632	6.39367	5.82936	6.12591
Slc13a3	9.43724	8.67163	7.4739	7.50703	8.10965	8.90769	2.35411	1.41761	1.04372	1.24746	1.05502	1.11426	1.10976	1.42591	1.04064	1.11125
Nsg2	7.039	7.35382	8.77297	8.75147	8.93091	9.20557	3.11112	1.36996	1.87474	2.35573	0.98333	0.98333	1.04793	0.98333	1.01227	1.06143
Itih5	8.83622	8.67035	8.17766	8.2131	8.02622	8.11549	2.65276	2.96212	2.53113	2.45408	3.73979	3.55377	3.9637	4.23081	3.60319	4.20173
Nov	10.2483	9.2309	7.14618	7.21108	7.58539	8.5984	0.98333	1.71327	1.69812	1.35319	5.34901	5.24578	5.08473	5.04318	3.7262	5.54092
Gnao1	7.33319	7.72781	8.6405	8.62777	8.69823	8.81279	5.86841	6.99031	7.10638	7.28558	2.53723	3.01453	2.83542	2.9365	2.98296	3.05648
Dnm1	7.09624	7.70248	8.82097	8.63647	8.78203	8.78871	3.8205	1.7877	2.8682	1.86316	1.8834	1.71884	1.7377	1.42591	1.41038	1.49581
Eef1a2	7.21249	7.90669	8.50307	8.50773	8.68981	8.99887	1.6567	1.50844	2.63293	1.75928	6.40902	6.48983	6.90567	6.96864	6.26023	6.5244
Spp1	9.68693	8.29594	7.3667	7.44499	8.42592	8.59812	8.22066	4.85226	6.08354	6.05694	2.35039	2.17393	2.27168	2.6406	1.79047	2.03681
Vwa1	8.61597	8.93323	8.0116	7.92431	8.19948	8.0982	0.98333	2.42284	1.66004	1.00944	6.79004	6.57045	6.41165	6.35249	6.36702	6.19685
Aebp1	9.21735	8.80153	7.37471	7.41294	7.98417	8.92898	4.91643	4.39138	5.03675	4.24675	4.89619	4.70659	5.05361	4.81967	5.27176	4.95989
Thy1	6.77044	7.20868	8.76857	8.74102	8.96576	9.07451	6.74708	5.84187	5.36135	4.96131	5.0312	4.69618	5.40909	5.5452	4.74065	5.05683
Aldh1a2	9.64448	8.75992	7.27464	7.38636	7.8647	8.55404	3.23641	2.59852	1.31274	2.21695	1.31073	1.44799	1.59367	2.11871	1.68658	1.84403
Pdxk	9.19105	8.80589	7.83469	7.81206	7.83322	7.99352	4.60404	4.64265	3.98529	4.14147	4.50635	4.8308	4.85806	4.79529	4.69005	4.69785
Gjb2	9.47603	8.90318	7.29251	7.31879	7.84722	8.62113	0.98333	1.04532	1.10169	1.08506	1.12332	1.05028	0.98333	0.98333	0.98333	1.06143
Fbxl16	6.89333	7.52991	8.65965	8.66482	8.97428	8.72137	2.11398	1.92594	1.53938	1.75928	1.9601	1.71884	2.03724	1.54767	2.39562	2.3794
Islr	9.67132	8.78249	7.21117	7.28377	7.88698	8.57819	1.46517	2.49125	1.49681	1.50774	3.36983	3.47067	3.88632	3.78735	3.68185	3.74186
Dlg4	7.24759	7.42126	8.63401	8.60756	8.78191	8.71108	4.9534	3.77559	4.25806	4.23573	1.8834	2.04854	2.31169	1.95228	2.56145	2.31708
Atp2b2	6.63761	7.27639	8.83773	8.84751	8.80146	8.93515	1.97705	2.80971	2.98061	3.0207	1.5774	1.75942	1.92133	1.86126	1.79047	1.94364
Hlf	8.84542	8.20693	7.90664	7.78414	8.11879	8.40117	4.07655	5.93077	4.38019	5.78948	5.58528	6.57329	6.65334	6.71936	7.20398	6.45676
Map1b	7.23765	7.76886	8.60348	8.60668	8.59128	8.42416	3.65079	4.75822	5.39651	4.96465	5.422	5.41409	5.55791	5.37469	5.3895	5.75878
Enc1	7.52526	7.7635	8.26604	8.30656	8.61687	8.66133	4.93503	4.89497	5.18488	5.99784	5.83736	5.39168	5.57034	5.35814	5.34327	6.37054
Mt1	8.00895	7.47624	8.21206	8.22469	8.69171	8.49178	6.64342	3.91494	6.31709	5.08157	4.30052	3.98015	5.01171	5.084	4.52413	4.16976
Tcaf1	7.57191	7.7118	8.51327	8.43778	8.41903	8.39678	5.37734	6.56499	6.29707	6.88392	6.09291	5.85194	5.8929	5.84153	6.15791	6.07818
Rgs5	4.35413	5.42649	11.0727	11.079	10.1703	6.90851	4.64981	6.99326	5.97917	5.23607	7.0697	6.70119	7.53168	7.48347	6.89331	6.59558
Alcam	9.48573	9.03349	7.17721	7.36558	7.64816	8.24377	6.18832	4.12329	5.64091	5.44901	1.52787	1.71884	1.86865	2.26792	1.41038	1.8732
Nptxr	7.46347	7.5101	8.22164	8.2634	8.51135	8.88573	3.23641	3.11448	2.55208	3.0078	4.97686	5.288	5.08088	4.71958	5.18068	5.24012
Celf4	6.6896	7.11252	8.6688	8.66141	8.80284	8.84294	2.90007	1.16184	2.83441	2.59006	1.67165	1.54404	2.24438	1.65994	1.8558	1.81426
Pcolce	8.96474	8.26421	7.32016	7.40278	8.13829	8.66228	4.14208	4.02672	3.98529	3.56936	5.94742	5.76742	6.11927	6.01518	5.84151	5.68565
Ldhb	7.88702	7.46232	8.12543	8.15858	8.43033	8.67145	4.67216	3.53753	5.25681	4.13851	6.08222	6.5633	7.05261	7.08635	6.2382	6.028
Slc38a2	9.73526	9.09721	7.15272	7.07945	7.61439	8.0494	5.49486	5.82429	5.19157	4.97628	7.09543	6.53728	5.85279	5.73661	6.47622	6.80069
Cyfip2	8.00368	8.09887	8.0175	8.09435	8.27025	8.17794	3.35169	3.49373	3.49491	2.59006	4.12007	4.50058	4.74327	4.94686	3.98898	4.19597
Col1a2	8.97076	8.66173	7.27464	7.17332	7.88555	8.67614	7.16863	5.40688	6.76561	6.58776	4.05162	4.65375	5.23101	5.19998	4.73848	5.18884
Stmn3	6.32659	7.03446	8.57281	8.57172	9.03561	9.07644	2.35411	1.26965	1.15741	1.56168	1.47657	2.28929	1.9554	2.26792	1.93351	1.72108
Igfbp6	8.52651	8.10359	7.61554	7.54634	8.20883	8.58847	6.14902	5.25119	6.76225	7.14984	5.0178	4.71177	5.15607	5.18129	5.68742	5.24431
Dclk1	6.99127	7.45124	8.62883	8.63474	8.39567	8.48201	3.17513	2.16808	2.22699	2.45408	1.5774	1.63409	1.92133	1.54767	2.54174	2.34858
Pnmal2	7.74614	7.55013	8.09375	8.13789	8.30304	8.72914	0.98333	2.02156	2.50988	2.22812	1.5774	1.23429	1.79529	1.42591	1.49483	1.58666
Clip3	7.2702	7.53691	8.20264	8.1861	8.44816	8.90312	1.6567	1.59389	2.8682	1.41311	1.84346	1.67709	2.17376	2.9365	1.9928	2.02386
Penk	7.47112	7.34825	8.27013	8.25438	8.38679	8.75664	3.17513	1.75096	2.63293	3.83696	1.76011	1.71884	1.75715	2.11871	2.03572	1.75281
Rbp1	8.80188	8.04925	7.4668	7.5864	8.08396	8.46443	6.22658	4.87377	5.90582	6.54153	5.75633	6.15353	6.47835	6.48415	6.41658	6.14248
Atp6v1g2	6.71991	7.04826	8.45078	8.39842	8.68735	9.05331	2.65276	2.08197	1.87474	2.95503	1.92226	2.14359	1.7377	1.65994	1.83975	1.68863
Dbn1	9.15082	9.83034	7.71861	7.71682	8.22132	5.71296	4.87848	5.5948	3.8396	3.98577	3.63841	3.61033	2.40096	2.89121	3.42093	3.58322
Ttyh1	6.35262	6.89636	8.79717	8.77293	8.97764	8.55302	0.98333	1.59389	1.40771	1.39341	1.71655	1.49681	1.7377	1.76411	1.77367	1.8732
Nap1l5	6.82591	7.25105	8.40574	8.47899	8.51505	8.83312	1.24427	1.26965	2.42161	1.75928	1.18853	1.11426	1.22599	1.42591	1.20007	1.1594
Hpcal4	6.94924	7.26377	8.4028	8.36112	8.57455	8.71513	4.81962	3.67133	2.63293	4.8246	0.98333	1.39746	1.07917	0.98333	1.01227	1.08656
Tecr	7.64595	7.48641	8.11638	8.05855	8.27897	8.64007	3.04414	6.05085	3.61918	2.82139	5.69874	5.56767	5.82195	5.75569	5.60432	5.30978
Cldn11	8.87362	8.3751	7.50344	7.56651	7.65627	8.21511	2.74	1.82352	1.69812	1.43254	1.5774	1.67709	2.62921	2.89121	1.90293	2.32766
Wfdc1	8.20641	8.35224	7.77932	7.75088	7.81909	8.23161	6.15696	7.46024	5.60378	5.91134	2.43345	3.36943	3.22583	3.3916	2.74507	2.63917
Slc38a3	8.376	8.38794	7.82565	7.81972	7.67731	7.97185	0.98333	1.21675	0.98333	1.22535	3.61488	3.54219	3.1321	2.89121	2.68343	2.75338
Slc1a3	8.078	7.91962	8.03504	7.99367	8.35156	7.62155	2.35411	1.85847	2.39867	2.06339	1.18853	1.17552	1.54974	1.29292	1.12256	1.11125
Rgs7bp	7.06059	7.32334	8.3346	8.30328	8.5061	8.45868	4.4573	2.87944	5.06616	4.39772	3.87469	4.38214	5.0218	5.01178	3.88328	5.01491
Slc13a4	9.1487	8.67988	6.9807	7.02483	7.52435	8.62377	1.82575	1.36996	1.04372	1.59655	1.12332	1.11426	1.04793	1.14641	1.01227	1.08656
Peg3	8.56995	8.38717	8.03226	7.94126	7.83717	7.10718	2.55992	3.71012	2.99597	3.06494	4.00712	4.17274	4.56714	4.62592	4.24511	5.23872
Rab6b	7.11483	7.56598	8.20892	8.13544	8.40798	8.38388	2.90007	4.91171	2.57272	2.73012	2.58645	1.34509	1.45763	1.54767	1.72205	1.47693
Lrp1	7.91848	7.88434	8.07837	8.00581	8.10925	7.77827	6.57982	5.78168	5.79599	5.40173	4.61709	4.66447	4.63704	4.58383	4.33663	4.27732
Agap2	7.09954	7.56734	8.36005	8.32497	8.42886	7.83337	3.89841	1.63479	2.22699	2.6659	2.06801	2.75836	2.66054	2.26792	2.63773	2.4965
Ppp2r2c	6.70556	7.11439	8.35358	8.3747	8.64638	8.35422	3.04414	3.95586	1.69812	2.18294	1.05502	1.29075	0.98333	0.98333	0.98333	1.06143
Ntrk2	6.11911	6.84196	8.81273	8.75786	8.95253	8.05847	4.17376	4.83042	5.15781	4.3423	1.05502	1.79889	1.22599	1.14641	1.20007	1.08656
Epb41l1	7.31628	7.5285	8.08864	8.19201	8.17009	8.16291	4.79946	3.59047	4.06759	3.77362	2.20038	2.1126	2.28514	2.84445	1.88739	2.07497
Slc16a1	8.29057	8.21787	7.81539	7.8334	7.34668	7.93963	5.32187	2.9781	4.99911	4.83742	5.07065	5.25645	5.44101	5.53051	5.3043	5.00506
Pfn2	7.59779	7.59782	7.95313	7.92857	8.14367	8.18511	4.2351	4.20025	3.67752	4.39525	3.97051	4.04724	4.44952	4.3858	4.13429	4.18438
Nlgn2	7.28669	7.3201	8.09277	8.03374	8.21357	8.40505	6.18832	6.24991	5.99837	6.18418	5.3877	5.1986	4.81926	4.89043	5.2354	5.11598
Rab3c	6.57107	7.18568	8.26065	8.35586	8.38038	8.59798	4.64981	2.67894	6.02857	5.45377	0.98333	1.05028	0.98333	0.98333	0.98333	0.98333
Cplx1	6.91221	7.20076	8.11088	8.14523	8.52027	8.41889	0.98333	0.98333	2.42161	1.26923	0.98333	0.98333	1.04793	0.98333	1.06847	1.00984
Prkar1b	6.48459	7.11064	8.26432	8.269	8.30643	8.85683	4.43133	3.22575	4.77252	4.16489	1.42338	1.17552	1.698	1.42591	1.38847	1.73703
Ndn	6.65863	6.95404	8.18406	8.19083	8.27807	8.82324	4.91643	4.33665	3.85653	5.4994	4.26317	4.76755	5.05164	5.04318	4.36776	4.79821
Gfap	5.14048	5.70306	9.73969	9.80868	9.70224	6.98663	0.98333	0.98333	1.93975	1.33266	1.05502	1.05028	1.10976	1.42591	1.12256	1.11125
Kcna2	5.92706	6.40218	8.66652	8.6733	8.69565	8.66755	4.9534	3.25227	6.40461	6.34726	1.25093	1.67709	1.698	1.86126	1.59389	1.47693
Slc7a11	8.88162	8.85829	7.16386	7.00884	7.49284	7.60757	4.20475	1.26965	3.12736	1.99969	1.05502	1.54404	1.30741	1.42591	1.01227	1.27319
Rcan2	7.23765	7.29635	7.89136	7.86039	8.19373	8.44066	3.17513	2.65925	3.93834	2.96841	5.83227	6.61949	6.41471	6.50685	6.17	5.80303
Nat8l	6.56313	7.0841	8.22718	8.27682	8.36289	8.2717	3.11112	2.87944	1.58073	3.43131	2.85099	2.65461	3.18332	3.18192	3.15504	3.22998
Pld3	7.06284	7.41443	7.93509	7.96908	7.94453	8.41054	6.09213	5.16656	5.85616	4.70985	5.52974	5.36891	5.50137	5.4547	5.77868	5.53181
Gas7	7.00306	7.24421	8.00542	8.08802	8.06245	8.31294	5.17307	4.2926	4.76357	4.38032	3.23741	3.32956	3.89951	3.48602	3.43169	3.49684
Ntm	6.36728	6.46818	8.29462	8.30547	8.51536	8.74149	1.6567	1.26965	3.97757	3.66282	0.98333	1.17552	1.35924	1.29292	1.20007	1.45781
Prkcb	6.73836	6.86886	8.39632	8.3548	8.07523	8.2526	5.7261	2.69836	5.08783	4.40757	1.12332	1.54404	1.33356	1.14641	1.29734	1.31631
Ildr2	8.56876	8.13948	7.27335	7.18996	7.42341	8.0638	1.24427	2.80971	1.87474	2.2057	1.67165	1.54404	1.97215	1.86126	1.66851	1.98431
Lynx1	7.30013	7.50511	7.9011	7.7684	7.98417	8.14522	4.40488	4.20025	3.31057	3.25701	6.16556	6.23133	6.10321	6.00459	5.98438	5.72117
Lsr	7.67939	8.38794	7.42728	7.45289	7.70589	7.91759	6.23411	3.94777	5.83068	6.24589	3.9234	4.31566	4.09943	4.36938	4.44143	4.39763
Mt3	6.37456	6.24505	8.41256	8.31958	8.62644	8.56812	1.24427	1.04532	1.62093	0.98333	1.12332	1.11426	1.1397	1.65994	1.27363	1.18289
Adcy1	7.21045	7.70932	8.08645	8.01518	7.88508	7.61234	2.35411	0.98333	1.58073	1.81955	1.47657	1.44799	1.45763	1.29292	1.77367	2.07497
Plekhb1	6.43324	6.82374	8.18178	8.2026	8.37954	8.46784	5.7261	5.04665	4.75907	5.63032	1.5774	1.58976	2.48501	2.89121	1.94856	1.99761
F3	8.23218	7.3641	7.38506	7.40278	8.06413	8.03797	3.35169	3.95586	3.38248	3.08963	2.40629	2.44667	2.69119	2.84445	2.37349	2.07497
Stx1b	6.73413	7.28557	8.04938	7.88542	8.1021	8.41873	1.97705	1.32067	2.27816	3.05871	1.18853	1.39746	1.30741	1.42591	1.20007	1.37866
Car2	6.69977	7.38522	7.9542	8.00446	8.10333	8.24756	5.70458	6.99915	5.12325	6.6673	1.25093	2.42161	1.63631	1.86126	1.38847	1.8732
Syn1	6.08845	6.88871	8.15295	8.15374	8.30482	8.65292	1.46517	0.98333	1.04372	1.89152	0.98333	0.98333	1.1978	1.14641	0.98333	1.03587
Faim2	6.36728	6.77597	8.08449	8.01384	8.43554	8.49254	3.40605	2.53512	3.53753	3.75058	1.05502	0.98333	1.01599	1.14641	1.12256	1.03587
Shank1	6.56949	7.36725	8.18338	8.10568	8.27734	7.6461	2.35411	1.10476	2.55208	1.80472	1.18853	1.05028	1.07917	1.14641	1.24953	1.06143
Slc6a20a	8.82763	8.5653	6.94509	6.81093	7.11061	7.80816	2.65276	1.71327	2.32758	1.15691	0.98333	1.11426	0.98333	0.98333	0.98333	0.98333
Tspan5	7.90032	8.21569	7.35298	7.36558	7.43809	7.71292	4.14208	4.10885	3.92235	4.27393	5.53288	5.36891	5.36223	5.14316	5.4383	5.70098
Osbpl1a	7.39891	7.68997	7.68678	7.69033	7.63605	7.87177	3.11112	3.88981	2.03208	3.03348	4.65796	4.61004	4.59172	4.81967	4.37055	4.61825
Nrxn1	6.01817	6.53129	8.2613	8.22354	8.39282	8.4869	2.55992	2.22275	2.06159	3.62109	1.05502	1.11426	1.48121	1.29292	1.24953	1.31631
Nsmf	6.80317	6.97173	8.06902	8.06113	8.21868	7.78152	7.0584	4.53873	6.8473	6.56152	4.90592	4.98421	4.69366	4.3858	4.74712	4.52714
Scn8a	6.15336	6.77241	8.24215	8.27347	8.17671	8.27418	0.98333	0.98333	1.73521	1.39341	1.12332	0.98333	1.16904	1.14641	1.32067	1.11125
Snap47	7.22864	7.29469	7.66473	7.67858	7.7899	8.1732	3.89841	4.10885	3.43979	3.41187	5.05762	5.1949	4.92623	5.11388	5.1582	4.8058
Prom1	7.39623	8.07548	7.83091	7.8059	7.04949	7.61402	5.04189	3.23907	4.50357	3.53382	3.29777	3.77772	4.06862	4.21252	3.99624	4.14007
Syn2	6.45572	6.95508	8.04863	8.00715	8.0912	8.18492	2.90007	1.85847	3.05585	1.80472	4.94419	4.4015	4.50809	4.3858	4.69229	4.67526
Napb	6.40153	6.90614	7.92667	7.96494	8.09902	8.40457	2.11398	1.82352	2.30308	2.25018	1.9601	1.67709	1.63631	1.65994	1.77367	2.03681
Phyhip	6.39439	7.08887	7.91902	7.89416	8.13329	8.21971	1.24427	1.26965	1.90761	1.00944	2.03293	2.1126	2.18817	2.11871	1.9183	1.8732
Ppp1r9a	6.25544	8.42769	8.23974	8.22122	8.091	6.40815	6.01553	4.43255	5.03303	5.38936	2.70262	2.17393	1.97215	1.76411	1.65021	2.13641
Slc12a5	6.11259	6.78188	8.11996	8.12682	8.13409	8.29875	1.82575	3.61111	1.53938	2.45408	3.20626	3.43353	3.45749	3.57463	3.19976	3.30682
Ppp1r1b	6.58211	6.68806	8.05538	8.05336	8.09491	8.05311	4.64981	1.82352	3.76084	3.95251	1.05502	1.11426	1.30741	1.54767	1.43196	1.39886
Cadm4	6.51455	6.73999	7.99011	7.85891	8.246	8.17301	2.35411	2.32626	1.87474	2.07581	2.61045	2.83631	2.98314	2.58479	2.62841	2.72166
Efemp1	8.90506	8.38212	6.64797	6.72869	7.1952	7.63925	6.77317	3.60083	7.31602	7.48019	3.10855	2.58857	2.67083	2.74612	3.58404	3.52008
Edn3	8.39893	8.12467	7.12781	7.16853	6.87401	7.77052	2.9739	2.4688	2.11885	2.68223	1.25093	1.05028	1.04793	1.54767	1.27363	1.29491
Isyna1	8.71783	8.18792	6.88465	6.85632	7.14043	7.57288	2.35411	3.85562	3.20874	2.77648	4.9952	4.87302	4.65011	4.86723	5.41003	4.69377
Slc38a1	6.78554	6.8076	8.0606	8.13298	7.83618	7.64911	3.60505	3.37805	3.47311	2.86495	2.76809	3.34297	3.99271	3.65812	2.53178	3.57437
Kbtbd11	8.51091	7.81225	7.19632	7.11972	7.32474	7.30275	5.87806	5.66559	5.86246	6.22862	4.18543	3.42094	3.87301	3.5457	3.57921	3.50152
Nefm	6.11477	6.67795	7.97068	8.04293	8.24024	8.20456	0.98333	1.10476	0.98333	0.98333	1.12332	1.05028	1.22599	1.54767	1.04064	1.13553
Acsl3	6.51125	6.48277	8.18406	8.20611	8.52608	7.23562	4.50789	4.78117	4.27075	4.32681	3.85474	3.73766	3.69284	3.73704	3.7262	4.05034
Fam131a	6.72704	6.75929	7.7757	7.74767	7.997	8.13745	6.09213	4.59163	5.25361	6.07714	5.57921	5.26352	5.21703	5.56697	5.40049	5.22039
Gsta4	8.09352	8.13256	6.96486	6.98996	7.36898	7.58777	2.35411	3.23907	3.60922	2.56387	4.12841	4.38214	5.04374	5.36644	4.25423	4.22454
Sorbs2	7.76149	8.12746	7.68839	7.69367	7.3916	6.46383	2.74	3.11448	2.9335	2.02551	6.04749	5.70905	6.20055	6.23504	5.64184	5.97096
Ogn	9.51997	8.67099	6.18133	6.34293	6.74986	7.58691	3.45843	3.76641	3.89802	3.56056	4.16936	4.13468	4.70121	4.62592	4.08064	4.14306
Tmx4	7.09624	7.18121	7.59921	7.68195	7.50249	7.89452	3.8205	5.01214	3.92235	3.95922	5.92368	5.86595	5.97306	6.14144	5.966	6.19973
Ppp1r1a	8.12299	6.87551	7.26173	7.28598	7.5486	7.84557	1.82575	1.46374	1.80666	1.78973	1.42338	1.05028	1.43365	1.42591	1.27363	1.18289
Gria1	5.88181	6.48856	8.18018	8.17659	8.14069	7.98942	2.23904	2.19567	2.7463	2.85778	0.98333	1.11426	1.1397	1.29292	1.06847	1.06143
Scn1b	6.73413	6.91692	7.66897	7.61837	8.07251	7.82397	4.40488	3.59047	3.93834	2.94154	3.9234	3.99722	4.05297	4.21252	4.17325	3.83375
2019-09-03	6.40864	6.73756	7.83469	7.83945	7.9611	7.94342	0.98333	1.21675	2.63293	1.47063	1.05502	1.11426	1.1397	1.14641	1.14886	1.18289
Camta1	6.4245	6.82945	7.77358	7.78883	8.04018	7.84223	5.89716	5.06172	4.9288	6.66577	4.51273	4.96698	5.19937	5.01178	4.71887	4.80011
Sv2a	6.14912	6.72043	7.82126	7.68195	8.06518	8.22283	2.23904	1.10476	1.31274	1.81955	1.25093	1.23429	1.54974	1.14641	1.17469	1.29491
Serpinf1	8.09683	7.46306	6.70692	6.66208	7.84526	7.87341	3.93584	2.89636	2.81722	3.26786	3.54189	3.24634	3.87746	3.95079	3.8355	3.47797
Ank3	5.88181	6.6368	8.26733	8.20142	8.17885	7.47125	6.15696	2.80971	6.60579	5.2983	3.673	3.38248	3.60969	3.42376	3.34902	3.46366
Slc6a17	6.46256	6.8633	7.72833	7.78883	7.71261	8.07116	0.98333	1.10476	2.03208	1.13335	1.42338	1.39746	1.54974	1.29292	1.22501	1.22875
Adgrl1	6.67198	7.13393	7.62295	7.75408	7.68116	7.60954	4.75826	6.39833	4.9953	4.99438	4.80036	4.48252	4.04903	4.09759	4.60236	4.42251
Abat	6.99008	7.07161	7.59202	7.6769	7.77045	7.35958	2.46068	1.95852	1.73521	1.15691	2.26227	2.37013	2.817	2.46626	2.78755	2.65605
Slc39a10	7.52689	8.02155	7.49427	7.42303	6.92907	6.98922	3.35169	3.70052	2.96507	3.5248	5.4355	5.61266	5.6414	5.63036	5.42222	5.90275
Tagln3	6.00416	6.26206	7.83875	7.81513	8.25228	8.20158	2.35411	1.50844	2.30308	1.61367	1.05502	1.29075	1.28078	1.54767	1.17469	1.11125
Tspyl4	6.78962	7.12745	7.49868	7.57015	7.60662	7.77603	2.9739	4.07952	3.63889	3.77742	3.50397	3.39541	3.63093	3.57463	3.3937	3.79617
Arpp21	6.46085	6.63419	7.97964	7.96079	7.85744	7.47248	0.98333	0.98333	0.98333	1.08506	0.98333	0.98333	1.10976	1.14641	1.09577	1.08656
Gpcpd1	7.54958	7.6843	7.62598	7.67013	6.87449	6.94499	5.09249	5.18044	4.47096	5.07849	5.52027	5.3018	5.47665	5.41525	4.99379	5.1684
Scamp5	6.46597	6.76169	7.75865	7.65137	7.79472	7.88156	3.11112	2.63929	2.69073	2.97505	4.23257	4.03076	3.94686	3.99428	3.70863	3.60946
Eml2	7.59857	7.26124	7.2682	7.27488	7.52466	7.36623	4.97154	4.76744	4.96829	5.1374	5.08357	4.88224	4.98102	5.31592	5.01182	4.92201
Chgb	5.85605	6.67415	7.73582	7.71354	7.83717	8.47448	0.98333	1.16184	1.15741	1.50774	1.12332	0.98333	1.1397	0.98333	1.14886	1.06143
Sh3gl2	6.12127	6.67287	7.66309	7.53335	8.00096	8.29212	2.74	3.91494	3.05585	3.17862	1.25093	1.17552	1.1397	1.14641	1.06847	1.06143
Psd3	6.6361	6.88981	7.74171	7.79817	7.90258	7.29719	3.11112	4.96079	3.63889	4.50944	4.6052	4.69094	4.97064	4.83171	4.86088	5.38512
Paqr8	6.0594	6.10119	8.0134	8.04946	8.62644	7.35624	4.91643	4.73959	5.32227	5.53016	4.72543	4.70659	5.06341	4.78295	5.35884	5.4924
Dkk3	7.52281	7.15413	7.07075	7.01952	7.58363	7.84985	3.93584	3.96391	4.00821	4.11164	2.29225	2.08093	3.80922	3.78735	3.03325	4.02457
Bsn	6.18888	6.92442	7.70214	7.77944	7.91825	7.67051	0.98333	1.21675	2.14665	1.39341	0.98333	0.98333	1.07917	0.98333	1.01227	1.00984
Srcin1	6.57739	6.95926	7.72989	7.60248	7.8772	7.41521	5.81918	2.42284	5.15097	4.58301	1.05502	1.17552	1.07917	1.29292	1.09577	1.11125
Enpp5	7.00071	7.00242	7.44641	7.4744	7.54559	7.64364	4.37793	5.10966	4.59218	4.41003	5.04447	4.81645	5.12084	5.05349	5.23233	5.12358
Tnfrsf19	7.33132	7.60117	7.34035	7.32095	7.21995	7.27047	3.23641	2.86232	3.24777	3.6421	1.31073	1.23429	2.06871	1.65994	1.38847	1.49581
Ncs1	6.5993	6.88213	7.50709	7.56286	8.03418	7.49027	4.07655	2.24934	3.28578	2.19437	1.80239	1.94679	2.25809	1.42591	2.06364	1.94364
Fbln1	8.30683	7.75871	6.49538	6.45734	7.27838	7.74903	4.2351	3.14311	4.4149	3.57811	3.32702	3.51874	4.76024	4.86723	3.61267	4.15202
Kifc2	6.3618	6.73512	7.76079	7.80744	7.85914	7.47433	3.97233	1.99039	2.17393	3.14957	1.99697	2.14359	1.86865	1.76411	1.57461	1.53284
Mt2	7.19615	6.37272	7.39809	7.36139	8.16931	7.43117	4.4573	3.5158	5.05886	4.41736	2.89072	1.94679	2.90682	3.3916	2.90022	3.01782
Basp1	6.17645	6.67415	7.58028	7.45486	7.78123	8.24684	3.11112	2.02156	3.86493	2.30392	1.12332	1.49681	1.57187	1.65994	1.34362	1.41877
Impact	6.87677	6.99022	7.47017	7.51082	7.46413	7.59061	2.65276	5.10239	1.69812	2.30392	4.18543	4.38862	4.61323	4.63967	4.57836	4.74002
Atp10a	7.20127	7.82375	7.20893	7.19704	6.94468	7.45541	2.9739	2.63929	2.88481	1.86316	3.14186	3.06397	2.94124	3.3587	2.86892	3.41986
S100b	6.87549	6.56459	7.44223	7.40888	7.7761	7.75791	2.23904	1.99039	1.62093	1.47063	1.12332	0.98333	1.22599	1.29292	1.24953	1.1594
Ncam1	5.92706	6.2261	7.86913	7.86632	7.73629	8.19991	4.77901	3.91494	6.73732	5.94639	2.23165	3.11177	3.46933	3.3916	3.06121	2.96461
Adcy5	7.52444	7.05803	7.35013	7.36139	7.26344	7.22687	2.65276	3.025	1.80666	2.87918	4.16936	4.35591	4.30833	4.33597	4.21431	3.93058
Ptprs	6.35997	6.75208	7.83788	7.7684	7.69018	7.36557	6.46288	4.10158	5.52917	6.1849	3.95185	4.10349	3.8819	3.99428	3.69083	4.02457
Rab11fip4	6.38901	6.58501	7.66832	7.6548	7.69561	7.66998	4.83951	2.49125	4.13853	4.00537	1.05502	0.98333	1.01599	1.14641	1.04064	1.03587
Rasgrp1	5.94184	6.21041	7.95233	8.00849	7.83199	7.71292	3.55782	2.53512	5.23107	3.94238	1.36815	0.98333	1.1397	1.14641	1.09577	1.06143
Gstm5	6.99008	6.73756	7.21519	7.27042	7.5889	7.83217	2.11398	3.04031	2.27816	2.42527	3.673	3.76781	4.32145	3.81187	3.54496	3.43949
Acot7	5.82716	6.38364	7.71356	7.77156	7.81335	8.08292	5.09249	4.82601	4.92077	4.50715	6.20352	5.73726	5.35427	5.66441	5.83139	5.54092
Glrb	6.97819	6.93401	7.30598	7.3231	7.43549	7.60532	0.98333	0.98333	1.87474	1.03509	1.12332	1.34509	1.33356	1.14641	1.14886	1.206
Sptb	5.72268	6.79947	8.20713	8.26788	8.68571	5.80404	2.46068	3.14311	2.06159	2.71433	3.93294	4.18768	4.40088	4.23081	3.21228	4.03106
Ctxn1	6.19506	6.21041	7.55829	7.60956	7.9937	7.88133	2.82225	2.61905	3.40568	2.51914	1.67165	1.29075	1.45763	1.42591	1.41038	1.31631
Cend1	6.33966	6.58501	7.46904	7.44895	7.6635	7.88551	1.6567	1.04532	1.31274	1.45171	1.31073	1.11426	1.1397	1.29292	1.17469	1.08656
Bmp7	8.75595	7.89037	6.17033	6.25075	6.56969	7.72747	0.98333	1.71327	1.90761	1.6306	1.18853	1.11426	1.22599	1.42591	1.01227	1.00984
Slc25a23	6.46085	6.65237	7.53988	7.6007	7.62953	7.46692	5.09249	4.51154	5.19157	5.37562	4.06904	4.42691	4.42844	4.1562	4.27229	4.12196
Slc22a17	6.53742	6.71055	7.57403	7.51271	7.42079	7.55929	0.98333	1.63479	1.10169	1.31182	1.71655	1.91121	1.83243	1.95228	2.00725	1.65543
Mllt11	6.37274	6.38364	7.45437	7.60956	7.73259	7.75665	2.74	2.89636	3.66796	3.50658	2.85099	2.69701	2.84454	2.11871	2.90794	3.18997
Rgs4	5.76483	6.42955	7.89888	7.90139	7.40726	7.88759	2.23904	1.92594	3.47311	2.58139	2.20038	2.04854	2.65017	2.33711	2.39562	2.31708
Mapk8ip1	6.49965	6.70931	7.65028	7.57377	7.52741	7.15333	2.11398	2.13994	2.22699	1.39341	4.36541	4.48252	4.26142	4.43397	4.61892	4.42743
Arhgef9	6.66161	7.02053	7.26992	7.37809	7.2101	7.53852	1.6567	1.7877	2.06159	1.72817	4.12007	3.90978	4.41013	4.43397	3.78188	3.97161
Ckmt1	5.73404	6.22783	7.53738	7.58999	7.82407	8.14231	2.82225	2.27544	3.18212	2.56387	1.12332	1.05028	1.04793	0.98333	1.06847	1.08656
Zfp365	6.09067	6.54665	7.60399	7.61309	7.73629	7.37418	4.6271	2.51335	5.23754	4.91717	2.51198	2.20365	3.31383	3.25525	2.0774	2.51512
Epb41l3	6.4245	6.50295	7.49354	7.40685	7.31028	7.76549	2.35411	1.46374	2.91745	1.26923	1.12332	1.23429	1.61515	2.26792	1.51519	1.67213
Apcdd1	7.93581	8.44344	6.69224	6.53384	6.42985	6.86639	2.11398	2.845	0.98333	1.72817	2.10226	2.08093	2.74089	3.21905	2.63773	3.05011
Syngr1	6.40864	6.70558	7.40672	7.38843	7.35804	7.63346	3.17513	1.04532	1.73521	1.61367	3.25274	3.12736	3.56072	3.45523	3.16151	3.07543
Coch	8.28913	7.5418	6.38864	6.43358	6.67365	7.55318	1.24427	1.75096	0.98333	1.18008	1.80239	1.17552	2.17376	1.95228	1.43196	2.04964
Snph	6.0065	6.29384	7.5604	7.62363	7.75776	7.59118	1.6567	1.82352	1.361	1.06029	0.98333	1.11426	1.07917	0.98333	1.01227	1.03587
Fam213a	7.0054	6.72902	6.99844	7.01686	7.47017	7.56103	4.87848	5.00825	3.92235	4.85732	2.63405	2.83631	3.49273	3.48602	2.70131	2.76899
Bex3	6.50131	6.31845	7.3342	7.25015	7.63887	7.73315	4.97154	5.10239	4.82508	5.29432	4.59921	4.49459	4.98309	5.23666	4.38998	4.56562
Alg2	7.19307	6.87551	6.92067	6.97905	7.30779	7.45822	3.89841	5.7794	3.96201	4.50026	4.62888	4.86375	4.6886	4.56953	4.73198	4.93763
Acsl6	6.16809	6.35538	7.60944	7.69367	7.67429	7.13746	0.98333	1.10476	1.04372	1.00944	1.84346	1.58976	1.63631	1.86126	1.59389	1.43842
Gpd2	7.12565	7.33866	7.05588	7.08455	7.02291	7.00082	4.14208	5.25119	3.70583	4.62584	5.37024	5.29146	5.27384	5.16235	5.53246	5.46871
Psd	6.01351	6.56047	7.46792	7.49177	7.8433	7.25045	2.23904	0.98333	3.155	1.39341	0.98333	1.05028	1.04793	1.29292	1.01227	1.03587
Adora1	5.95646	6.26713	7.48208	7.48408	7.7658	7.64446	4.04264	1.95852	5.05153	3.59546	2.26227	1.94679	2.36338	2.6406	1.87168	1.65543
Bex2	5.69388	6.22089	7.55512	7.57196	7.51639	8.04131	4.71585	2.446	5.54753	6.35429	1.18853	1.05028	1.22599	1.14641	1.12256	1.22875
Lpar1	7.84965	7.3282	6.4269	6.49227	6.84885	7.60363	4.60404	3.45999	4.92479	5.57893	2.06801	2.14359	2.67083	2.46626	1.82351	2.06236
Tmem59l	5.31706	5.98917	7.59098	7.65651	7.81035	8.16997	4.6271	1.67456	4.33861	3.88006	0.98333	0.98333	1.10976	0.98333	0.98333	0.98333
Pak1	6.3077	6.73512	7.3022	7.31228	7.19174	7.67749	2.9739	1.85847	2.32758	2.59006	1.31073	1.29075	1.25364	1.29292	1.20007	1.1594
Cdk5r1	6.03664	6.50008	7.38546	7.35297	7.53106	7.68257	1.82575	1.32067	1.69812	1.33266	1.18853	1.49681	1.50442	1.65994	1.29734	1.49581
Cadm3	5.91463	6.56733	7.418	7.41496	7.52527	7.63595	1.6567	1.5518	2.06159	1.13335	1.76011	2.1126	1.88642	2.0379	2.19566	1.62146
Pla2g7	5.28652	5.8832	7.64863	7.54264	7.91359	8.1153	3.17513	2.35102	3.42851	3.69937	2.70262	3.11177	3.83233	3.71121	4.18918	4.6586
Abhd12	6.60395	6.59981	7.16386	7.16131	7.30957	7.53675	5.05896	4.78572	4.32041	4.41003	5.21458	4.95393	5.46634	5.39105	5.06286	5.12813
Ngef	5.86383	6.48131	7.47763	7.59892	7.41454	7.51833	4.58059	2.67894	3.01117	2.51002	1.12332	1.11426	1.1397	0.98333	1.01227	1.06143
Ptk2b	6.00181	6.46671	7.33912	7.38223	7.53349	7.55084	6.29299	5.4956	5.34044	6.08944	2.1684	2.51937	2.4733	2.74612	2.46006	2.61347
Unc80	6.36363	6.981	7.51544	7.45683	7.32228	6.55873	0.98333	0.98333	1.10169	1.10941	0.98333	0.98333	1.07917	0.98333	1.04064	1.00984
Mapk10	6.04122	6.61843	7.25263	7.12961	7.34737	7.79958	1.24427	1.21675	2.30308	1.56168	2.20038	2.28929	2.14452	2.6406	2.28138	1.84403
Nacc2	6.82989	6.76527	7.00929	7.10976	7.24353	7.2129	4.91643	4.98076	5.64091	4.9911	4.96295	4.95829	4.80998	4.51085	5.29697	5.20614
Olfml3	7.93088	7.1614	6.23514	6.25527	6.97273	7.61374	4.14208	3.54827	3.77871	4.13555	2.63405	3.31602	3.89951	3.95079	3.28524	3.60512
Trim32	5.98527	6.3538	7.19406	7.24561	7.47682	7.90278	3.77991	5.52036	4.33257	4.5589	5.19487	4.89596	4.94543	4.85549	5.32752	4.96836
Cpq	7.81797	7.14315	6.37512	6.35563	6.94103	7.49877	4.14208	5.47884	4.54072	4.22463	5.30557	5.146	5.28895	5.36644	5.67503	5.28558
Kcnc1	6.07735	6.50295	7.35419	7.32526	7.34183	7.52816	1.82575	0.98333	0.98333	1.08506	0.98333	0.98333	1.01599	1.14641	0.98333	1.11125
Arhgap32	6.13205	6.58366	7.37551	7.41699	7.27765	7.34009	4.04264	4.65264	4.704	4.29797	3.73979	3.88248	4.2984	4.03649	4.17325	4.67319
Rundc3a	6.19917	6.46083	7.46867	7.50703	7.3577	7.1024	2.11398	1.16184	1.8411	1.18008	0.98333	1.11426	1.01599	0.98333	1.01227	1.03587
Mapre3	6.05034	6.29219	7.3043	7.2926	7.47903	7.67051	4.83951	5.18044	3.54799	4.33457	4.66942	4.3292	4.25801	4.46522	4.34803	4.30701
Asrgl1	6.05034	6.41745	7.30094	7.3843	7.52068	7.36124	5.46956	5.20441	5.69604	5.53129	4.623	4.8308	5.02581	4.87888	4.94397	5.05841
Tiam1	6.78006	7.51295	6.95741	6.8593	6.75768	7.13746	4.60404	3.62132	5.29147	5.39184	1.84346	1.91121	2.23053	2.11871	1.59389	2.07497
Mapk4	7.85746	6.892	6.61182	6.49992	7.01597	7.11866	1.6567	1.10476	1.10169	1.03509	1.71655	1.39746	1.40927	1.65994	1.57461	1.31631
Mgat3	7.36094	6.82945	6.78595	6.82317	6.9923	7.18531	2.65276	3.65153	2.2007	1.93304	1.84346	1.91121	1.50442	1.95228	1.82351	1.63855
Kalrn	6.82193	7.15139	7.3135	7.28598	7.37644	6.02123	5.21934	4.73489	6.10318	6.48449	4.70329	4.28818	4.13331	4.1562	4.3309	4.57896
Gpr88	6.56154	6.08407	7.51834	7.4956	6.90674	7.31244	0.98333	1.10476	1.77138	1.13335	1.12332	1.05028	1.22599	1.14641	1.09577	1.25114
Scn2b	6.04806	6.40983	7.16247	7.2273	7.3916	7.62266	0.98333	0.98333	0.98333	1.00944	1.42338	1.17552	1.33356	0.98333	1.12256	1.11125
Camk4	5.68805	6.37115	7.5834	7.55371	7.37611	7.27825	2.65276	1.75096	2.32758	2.11241	1.31073	1.29075	1.52725	1.65994	1.27363	1.25114
Col1a1	7.55439	7.56186	6.12354	6.05698	6.9369	7.60897	7.14884	4.15878	5.68186	6.03248	3.23741	3.4949	4.33769	4.23081	3.49457	3.89547
Apbb1	6.47616	6.55771	7.20399	7.26145	7.03197	7.30587	3.50898	4.15175	3.22187	2.69837	5.1258	5.07543	5.13949	4.99046	5.35884	5.16102
Dlg3	6.2175	6.08598	7.30346	7.32741	7.20744	7.68523	5.15731	3.64153	5.57337	5.73672	2.70262	2.77825	2.70127	2.98041	2.87681	2.85922
Snap91	5.57256	6.30374	7.49243	7.45289	7.43191	7.53734	1.46517	0.98333	1.62093	1.29069	1.62529	1.75942	1.75715	1.95228	1.59389	1.551
Mfsd2a	6.78826	7.4258	6.8824	6.78924	6.75716	7.12456	3.45843	1.82352	2.57272	1.6306	1.05502	1.11426	1.01599	0.98333	1.04064	1.00984
Prg4	7.79713	7.71118	5.96911	6.15711	6.37938	7.66215	1.97705	1.36996	1.2628	1.61367	5.65615	6.14207	5.53697	5.33296	6.01776	6.04091
Ahcyl2	8.30064	7.65368	6.29969	6.15227	6.33408	6.92168	3.17513	4.27976	3.20874	2.5372	4.78989	4.89596	4.73594	4.19399	4.92697	5.09447
Srgap3	6.15336	6.57824	7.15877	7.18759	7.44843	7.04215	3.65079	3.12886	3.77871	3.29465	3.23741	2.31674	2.63973	2.0379	2.68343	2.3692
Slc24a3	7.48632	7.00445	6.44528	6.40127	6.80424	7.41713	2.35411	4.09426	3.98529	2.64106	1.31073	1.34509	1.43365	1.42591	1.38847	1.43842
Kcnab2	5.99238	6.48131	7.17262	7.09721	7.57981	7.19656	2.74	1.85847	2.27816	2.47297	2.03293	2.23276	2.02124	2.11871	1.55508	1.94364
Cntfr	6.93946	6.42653	6.82741	6.83531	7.21768	7.26335	2.23904	2.02156	1.49681	1.41311	1.25093	1.34509	1.33356	1.54767	1.24953	1.35817
Ptprn	5.46417	6.14587	7.59408	7.41699	7.51976	7.35724	1.82575	1.46374	1.97119	1.77458	1.52787	1.49681	1.50442	1.29292	1.61291	1.08656
Dlg2	5.99711	6.18029	7.23601	7.39254	7.33871	7.25297	1.82575	1.04532	1.45295	1.47063	2.85099	2.67596	2.78893	2.19524	3.0473	2.94414
Pmm1	6.25149	5.96028	7.11925	7.10726	7.40295	7.54234	4.53253	4.56542	4.05297	4.67561	4.53798	4.34928	4.78414	4.7705	4.69005	4.44939
Sorl1	5.80848	6.04135	7.43496	7.36976	7.4587	7.24034	5.67167	4.85659	4.87164	4.96298	1.99697	1.49681	1.85066	1.95228	1.75667	1.70494
Adgrb2	5.46417	6.32818	7.5027	7.48021	7.50187	7.06115	1.6567	1.04532	1.361	1.56168	1.25093	1.29075	1.10976	0.98333	1.34362	1.13553
Nmnat2	6.20326	6.55909	7.01801	7.0485	7.18364	7.31897	3.65079	2.92961	3.5992	3.47413	1.92226	1.87474	1.9887	1.86126	1.51519	2.16027
Serping1	8.29105	7.61249	5.90306	5.8924	6.61975	7.01105	3.8205	5.09141	4.56152	3.42648	4.91558	4.70659	5.32198	5.15279	4.88651	5.15954
Jph4	6.18682	6.55219	7.0673	7.06663	7.21768	7.23089	0.98333	0.98333	2.14665	0.98333	0.98333	0.98333	0.98333	0.98333	1.06847	0.98333
Itih2	7.75383	7.22958	6.13113	6.17155	6.75768	7.27684	1.24427	1.26965	0.98333	1.39341	1.47657	2.01542	2.00506	1.86126	2.14429	2.2957
Usp54	6.80047	6.63027	6.99792	7.06921	6.98433	6.78824	3.45843	5.34044	3.43979	3.97587	4.18543	4.06354	4.23045	4.62592	4.32802	4.18438
Podxl2	6.77732	6.54803	6.93048	6.82622	7.03926	7.146	1.6567	1.63479	1.31274	1.83424	2.53723	2.14359	2.43758	2.79612	2.351	2.45851
Nptx1	5.48112	6.3217	7.23821	7.13208	7.39461	7.69901	3.97233	5.33424	3.7698	5.24709	1.71655	1.67709	1.45763	1.54767	2.04974	1.53284
Gpr37l1	4.59124	5.81796	7.5695	7.53708	7.96651	7.68097	0.98333	0.98333	1.04372	1.03509	1.12332	0.98333	1.10976	0.98333	1.06847	1.03587
Dock3	6.10386	6.38364	7.42612	7.44895	7.1875	6.61235	2.23904	1.10476	2.0905	1.6306	1.25093	0.98333	1.10976	0.98333	1.06847	1.22875
Aldh7a1	7.82396	7.17314	6.36228	6.11789	6.79515	6.85744	3.55782	5.67542	3.24777	3.53831	5.22627	5.21328	5.17788	5.39916	5.41139	5.19896
Fez1	6.28471	6.63027	7.03732	6.95143	6.97988	7.24541	1.6567	1.75096	1.04372	1.33266	4.26317	4.86375	4.84676	4.79529	4.24206	4.69989
Diras2	6.02281	6.47403	7.01545	7.16131	7.07308	7.36324	4.07655	2.16808	2.88481	2.17142	1.52787	1.54404	1.35924	1.65994	1.73946	1.41877
Ehd3	7.53341	7.05511	6.26131	6.28656	6.69553	7.26442	4.17376	5.49003	3.7244	4.67765	4.22482	4.58767	4.75057	4.97969	4.85889	4.62898
Mras	7.26434	7.01853	6.56776	6.46908	6.95379	6.7597	4.79946	5.84187	4.75907	4.99764	4.31519	4.25309	4.23045	4.44968	4.13429	4.47339
Rasl10b	6.0594	6.1659	7.27249	7.28819	7.41948	6.82736	1.46517	1.21675	1.69812	1.29069	4.23257	3.69645	3.39678	3.45523	3.81921	2.99146
Slc1a1	6.66755	7.03347	6.88409	6.98724	6.47988	6.96311	3.23641	3.85562	2.98061	3.11991	5.53601	5.01386	5.10953	5.12371	5.36867	4.64809
Slc24a2	5.62537	6.25188	7.29124	7.34025	7.1264	7.32171	1.46517	0.98333	1.53938	1.26923	1.31073	1.23429	1.16904	1.29292	1.38847	1.63855
Brsk1	5.87926	6.40678	7.15737	7.13208	7.42963	6.94143	2.90007	1.67456	1.69812	1.80472	1.18853	1.39746	1.30741	1.29292	1.27363	1.45781
Clstn3	5.76483	6.32494	7.17996	7.19468	7.25389	7.21733	1.46517	1.26965	2.35167	1.31182	0.98333	0.98333	1.16904	1.14641	1.22501	1.00984
Rbfox1	5.73969	6.26037	7.25045	7.13699	7.08928	7.43434	1.24427	0.98333	0.98333	1.10941	2.74659	2.58857	2.69119	2.79612	2.56145	2.56959
Kcnk2	7.35359	6.53829	6.67158	6.55602	6.72615	7.02332	4.29394	3.76641	6.99895	5.3049	1.36815	1.58976	1.59367	1.42591	1.43196	1.65543
Aifm3	7.64068	6.63158	6.71135	6.67903	6.672	6.52877	1.97705	1.36996	1.93975	1.18008	0.98333	0.98333	0.98333	0.98333	1.01227	1.06143
Abhd8	6.19917	6.422	7.00723	6.97631	7.2413	7.00125	4.40488	4.22054	4.48736	4.54781	4.53171	5.07944	5.03381	5.22757	5.22462	5.12662
Phyhipl	5.29422	5.99325	7.287	7.3231	7.33627	7.59855	1.97705	1.04532	1.04372	1.03509	1.12332	1.11426	1.04793	0.98333	1.09577	1.03587
Serpini1	5.59765	6.11811	7.26	7.30793	7.12075	7.40845	1.6567	1.75096	1.04372	1.35319	2.56205	2.65461	2.7603	2.46626	2.33963	2.32766
Dact3	5.9221	6.0235	7.02414	7.00078	7.49907	7.32206	5.41758	2.67894	4.23234	4.7433	2.23165	2.81721	2.8077	2.9365	2.76221	2.56959
Myl9	6.35262	6.42653	7.57786	7.62713	6.90767	5.83124	4.43133	4.33044	4.82938	3.95251	3.28291	3.12736	4.06862	4.17521	3.2185	3.5384
Arnt2	6.82459	6.48567	6.80209	6.76088	6.90392	6.92619	1.82575	1.10476	2.32758	1.91933	1.31073	1.11426	1.28078	1.14641	1.20007	1.31631
Phf24	5.70547	6.21391	7.2574	7.39459	7.18828	6.94276	1.24427	1.75096	1.93975	1.33266	1.47657	1.58976	1.52725	0.98333	1.32067	1.31631
AI593442	5.56622	6.05508	7.34076	7.27042	7.0533	7.40845	1.24427	0.98333	1.21107	1.35319	1.18853	1.11426	1.1397	1.14641	1.20007	1.03587
Strbp	6.25544	6.31519	7.2263	7.1492	6.96284	6.76676	3.97233	3.59047	4.94076	4.0626	4.49995	4.27425	4.5533	4.28435	4.52413	4.55216
Kcnj10	4.95874	5.76881	7.50563	7.68195	7.78097	6.95076	0.98333	0.98333	0.98333	1.00944	0.98333	0.98333	1.10976	0.98333	1.01227	1.03587
Slc4a4	5.57256	5.92866	7.46942	7.58999	7.88126	6.19658	1.24427	2.19567	2.30308	1.56168	2.83071	2.20365	2.82624	2.84445	2.65618	2.4965
Vxn	5.89453	6.15683	7.07666	7.10224	6.93828	7.42193	0.98333	0.98333	1.73521	1.39341	0.98333	0.98333	0.98333	0.98333	0.98333	1.00984
Abca2	6.44366	6.46377	7.05139	7.0537	6.68736	6.88552	1.82575	2.71753	1.80666	1.68021	4.37244	4.45807	3.95951	4.07751	4.30774	4.19308
Rasgrf1	5.32835	6.21041	7.29968	7.28377	7.28993	7.15756	1.46517	1.59389	1.49681	1.33266	0.98333	0.98333	1.01599	0.98333	0.98333	0.98333
Sv2b	5.55665	6.03344	7.25437	7.11724	7.22635	7.37451	0.98333	0.98333	0.98333	1.29069	1.05502	1.05028	1.04793	0.98333	1.01227	1.06143
Scara3	7.31723	6.86106	6.18407	6.08776	6.84836	7.23417	2.11398	2.24934	2.35167	2.1363	3.02175	3.27462	3.82774	3.85968	3.20603	3.34376
Aqp4	4.25509	5.46226	8.14219	8.22007	8.11108	6.33673	1.24427	1.63479	1.8411	1.31182	1.42338	1.39746	1.92133	1.65994	1.24953	1.73703
Sfxn5	5.46075	6.04529	7.29378	7.22499	7.48312	6.96618	2.35411	2.77354	1.361	2.03825	3.23741	3.39541	3.1321	3.18192	2.99025	2.9023
Nrn1	5.57572	5.96028	7.12306	7.10726	7.21389	7.48783	2.23904	2.16808	1.69812	2.40574	1.67165	1.63409	2.09951	1.86126	1.75667	1.79914
Gnal	5.54702	6.13298	7.22275	7.19704	7.17938	7.177	0.98333	1.41761	0.98333	1.00944	1.36815	1.39746	1.7377	1.54767	1.88739	1.73703
Sesn3	6.166	6.22783	7.0277	7.08962	7.24093	6.68391	4.00791	4.24716	4.7272	4.83742	4.25558	3.9277	4.20588	4.24888	4.30774	4.24421
Gpr162	5.71697	5.96859	7.25827	7.24105	7.20362	7.0434	1.24427	1.04532	1.04372	1.08506	1.12332	1.11426	1.07917	0.98333	1.12256	1.1594
Arhgef17	6.18475	6.33462	7.06927	7.00078	7.19328	6.64502	5.18866	4.5812	4.47644	5.83217	3.84466	4.04724	4.42541	4.11739	3.75217	4.20746
Dner	5.30187	6.05898	7.21027	7.22037	7.22747	7.36756	0.98333	1.10476	0.98333	1.39341	0.98333	0.98333	1.01599	0.98333	1.01227	0.98333
Ppm1e	6.09728	6.32979	7.05239	7.0769	7.076	6.75209	1.24427	1.50844	1.04372	2.02551	2.56205	2.7382	2.84454	2.40313	2.78755	2.681
Sod3	7.2074	6.65108	6.34607	6.33012	6.63398	7.20327	4.17376	5.42156	5.76941	4.10258	2.70262	2.87376	3.46933	3.18192	3.19976	3.44436
Vamp1	5.74251	6.09741	6.98437	6.9346	7.26161	7.34953	1.97705	2.53512	3.14125	2.91415	2.78926	2.51937	2.9155	2.69432	2.62841	3.30682
Cntn1	5.09715	5.72285	7.43266	7.43903	7.39995	7.16369	0.98333	0.98333	2.30308	1.6306	1.12332	0.98333	1.01599	0.98333	0.98333	0.98333
Id4	5.19083	5.2971	7.66178	7.62888	7.95884	6.51266	3.77991	2.42284	2.65245	3.48348	1.92226	1.67709	1.75715	1.76411	1.70442	2.08747
Efnb3	6.77457	6.38209	6.71262	6.67565	6.60999	7.04672	0.98333	1.32067	0.98333	1.03509	3.50397	3.97154	3.7522	3.85968	3.84759	3.21866
Stra6	7.52853	7.09268	6.32637	6.3344	5.9979	6.89476	0.98333	1.63479	0.98333	1.00944	2.74659	2.34368	2.50816	2.40313	2.23302	2.34858
Gabra1	5.72268	6.48711	7.09472	7.03276	6.88214	6.94987	0.98333	0.98333	0.98333	1.08506	1.36815	1.63409	1.61515	1.65994	2.3846	2.3794
Fam171b	5.43314	5.69806	7.24216	7.18996	7.5549	7.03172	2.46068	2.63929	2.0905	2.59006	1.12332	1.23429	1.45763	1.76411	1.06847	1.25114
Rbfox3	5.51445	6.02948	7.15272	7.16853	7.0785	7.19282	3.11112	3.85562	2.72801	3.83331	0.98333	0.98333	1.04793	0.98333	1.01227	1.00984
Csdc2	6.35813	6.24505	6.7611	6.84135	6.88357	7.02878	1.82575	1.26965	0.98333	1.52595	3.39767	3.2175	3.41526	3.45523	3.23701	2.45851
Foxf2	6.7454	7.49075	6.29885	6.35141	6.29663	6.88969	4.14208	3.05545	4.03076	5.21659	0.98333	1.11426	0.98333	1.29292	1.04064	1.00984
Cacnb3	6.07064	6.11062	6.88913	7.03803	6.97093	6.98836	4.04264	3.82943	3.09918	3.20146	3.72887	4.12695	3.58269	3.42376	3.94463	3.81132
Cacna1e	5.46758	6.11811	7.34484	7.38636	7.01641	6.6581	2.55992	1.67456	0.98333	1.26923	0.98333	1.29075	1.35924	1.14641	1.27363	1.41877
Scrn1	5.89958	6.34264	6.89304	6.9061	6.67034	7.27755	2.46068	3.94777	2.83441	3.27864	2.74659	2.83631	3.10199	2.6406	2.97563	2.63917
Syngap1	5.63146	6.04135	7.06433	6.91471	7.18519	7.1226	3.8205	2.51335	3.18212	3.01426	1.47657	1.58976	1.50442	1.54767	1.38847	1.51445
Pacsin1	5.61619	6.24162	6.99324	6.92042	6.90908	7.26085	1.24427	0.98333	0.98333	1.10941	1.25093	0.98333	1.01599	0.98333	1.09577	1.03587
Hspa12a	6.11694	6.0993	6.86885	6.90897	6.88548	7.05663	2.82225	4.95676	3.40568	2.99479	4.04283	3.82629	4.13703	4.28435	3.86753	4.49232
Cspg5	5.34697	5.72776	7.23249	7.27042	7.39829	6.95871	1.6567	0.98333	1.31274	1.71236	1.05502	1.05028	1.01599	1.14641	0.98333	1.00984
Slc40a1	6.77595	7.34905	6.60638	6.60294	5.92291	6.65865	2.74	3.07043	2.14665	2.85057	2.70262	2.83631	2.95814	3.45523	2.68343	2.81481
Fam234b	5.55665	5.77594	7.09714	7.10726	7.15234	7.20438	4.43133	3.87282	4.57181	4.3627	3.39767	3.24634	3.60969	3.81187	3.36594	3.6181
Ocln	7.30776	7.71304	6.14619	6.24165	6.05402	6.4075	4.32248	6.0863	4.61226	5.37311	2.65727	2.75836	3.24662	3.10466	3.10217	3.24121
Dzank1	5.89705	6.35538	6.97491	7.09973	6.92259	6.59941	2.11398	1.71327	2.17393	2.44454	1.9601	1.71884	1.81398	2.40313	1.96346	1.72108
Dnajc6	6.81392	6.73756	6.49538	6.51886	6.48303	6.76827	0.98333	1.21675	1.31274	1.15691	1.05502	0.98333	0.98333	0.98333	1.06847	1.08656
Wnt4	7.69546	6.64201	6.06334	6.07245	6.33477	6.9784	4.79946	3.55894	5.74915	5.23192	1.80239	1.63409	1.67773	2.11871	1.57461	1.88756
Sbk1	5.82451	6.32494	6.91408	6.95977	7.04651	6.65539	4.71585	4.24716	4.35657	5.05987	4.53171	4.78239	4.59982	4.74526	4.11774	4.28819
Scg3	5.07944	5.8588	7.11352	7.1589	7.25977	7.2407	1.46517	1.10476	1.58073	0.98333	0.98333	0.98333	1.04793	0.98333	1.12256	1.11125
Hdac11	5.99946	6.24162	6.91573	6.9061	6.84788	6.76424	0.98333	2.22275	1.21107	1.37344	2.40629	2.04854	2.70127	2.11871	2.76221	2.16027
Lsamp	5.60386	6.05898	7.03732	6.89163	7.10939	6.94053	0.98333	1.32067	1.49681	1.15691	1.62529	1.67709	2.23053	2.69432	1.8558	2.34858
Elmod1	5.7565	5.9435	6.96327	6.99808	6.86052	7.11274	0.98333	1.46374	1.69812	1.00944	1.05502	1.05028	1.04793	1.14641	1.01227	1.06143
Spire1	5.82451	6.18565	6.92831	6.87114	7.11913	6.68923	3.17513	3.84694	3.32281	3.0835	3.84466	3.99722	3.80922	3.90595	4.10772	4.38249
Srarp	6.84569	7.91317	5.95955	6.00418	6.27573	6.55989	0.98333	0.98333	0.98333	0.98333	3.56663	3.53051	3.02385	3.48602	3.62677	2.84457
Plppr4	4.99224	5.61574	7.20579	7.24561	7.05415	7.42034	1.24427	1.16184	1.45295	1.64732	0.98333	0.98333	0.98333	0.98333	1.06847	1.00984
Cbarp	5.44701	5.97273	6.95314	7.0511	6.92537	7.16941	3.23641	2.65925	2.17393	2.39588	1.62529	1.44799	1.33356	1.42591	1.79047	1.70494
Rab15	5.7676	6.03146	6.89694	6.76088	7.06722	6.98533	2.55992	2.89636	1.04372	2.33523	1.05502	1.11426	1.22599	1.29292	1.06847	1.11125
Ddr1	6.39439	6.17671	6.67677	6.6891	6.80525	6.72438	4.89758	4.07952	4.50357	4.22741	3.38382	3.40823	3.79987	3.76242	3.84759	3.78086
Akap6	5.30569	5.8832	7.28742	7.25015	7.46062	6.26658	1.24427	1.21675	0.98333	1.08506	4.31519	4.50058	4.53932	4.26672	4.50644	4.29898
Rcn3	7.38816	6.86552	5.95742	5.86305	6.50612	6.84415	3.55782	3.79376	2.98061	3.77362	4.35124	4.7323	5.37645	5.15279	5.0154	5.20327
Iqsec3	5.57887	6.20161	6.98384	7.01419	7.26381	6.37816	1.24427	0.98333	0.98333	1.00944	0.98333	1.05028	0.98333	0.98333	1.01227	0.98333
Grin2a	5.37989	5.94139	7.04387	7.0485	6.84739	7.14755	0.98333	1.10476	1.04372	1.00944	1.05502	1.11426	1.04793	0.98333	1.34362	1.27319
Timm8b	5.97573	5.87216	6.77207	6.71233	7.05669	6.99868	3.23641	4.3854	3.31057	3.97587	5.12163	5.35242	5.10005	4.99046	4.79579	4.54084
Col6a1	7.22764	6.77715	6.06829	6.04134	6.35485	6.90119	5.27882	4.20704	5.05886	4.66538	3.99805	4.35591	4.56714	4.69343	4.02493	4.21032
Ahi1	5.85345	6.06287	7.11877	6.99538	6.91515	6.42419	4.50789	3.07043	3.74273	3.87296	2.65727	2.3961	2.7603	2.84445	2.20822	2.50584
Hmgcs2	7.55439	6.55357	5.78776	5.93815	6.39819	7.1363	3.8205	2.42284	3.7336	3.62531	1.67165	2.01542	1.93847	2.11871	1.90293	2.17205
Pllp	6.6361	7.33706	6.27764	6.16676	6.32287	6.60955	4.9534	6.7345	4.8758	4.5589	2.32161	3.17313	2.17376	2.11871	2.18299	2.04964
Ptprd	5.78682	6.04725	7.07568	6.9061	7.1875	6.33061	4.69417	3.68112	4.9288	5.03943	1.62529	2.17393	2.11467	1.95228	1.75667	1.8732
Bmpr1a	7.04585	6.55771	6.43459	6.48072	6.71011	6.09923	3.85998	4.00349	3.79637	3.5517	4.29313	4.63206	4.91112	5.37469	4.8826	5.2471
Col6a2	7.36642	6.7948	5.77813	5.83913	6.40683	7.13201	4.9534	3.86425	4.77252	4.39525	3.72887	4.21712	4.28171	4.55508	3.84357	4.04714
Dtx3	6.26917	5.8588	6.89916	7.01419	6.77525	6.50061	5.34987	4.78572	4.35657	4.97628	4.6464	4.36908	4.43751	4.36938	4.38998	4.36463
Dmxl2	5.91713	6.33302	7.12639	7.12468	6.72029	6.08235	5.21934	3.60083	4.85066	4.85011	3.95185	4.07965	3.74735	3.57463	3.92953	4.17562
Ctnnd2	5.35803	5.81104	6.97597	6.87114	7.11183	7.13552	1.6567	1.75096	2.2007	2.11241	0.98333	0.98333	1.16904	0.98333	0.98333	0.98333
Rims3	5.69679	6.14587	6.79135	6.64494	6.98032	6.98793	1.97705	1.26965	2.53113	2.2057	1.18853	1.29075	1.25364	0.98333	1.57461	1.51445
Brinp1	5.2671	5.69556	7.06878	7.09468	6.98166	7.13941	3.40605	1.63479	2.7463	2.12441	0.98333	0.98333	1.01599	0.98333	1.14886	1.06143
Tspyl2	6.05261	6.28887	6.86544	6.96254	6.68955	6.38735	4.55676	5.08773	4.30199	4.53213	3.50397	3.64323	3.98035	3.95079	3.811	3.84484
Rnf227	5.60386	5.69305	6.82215	6.76088	7.21617	7.14213	3.17513	2.32626	2.2007	3.50199	2.20038	2.94586	2.88046	2.6406	2.17021	2.87372
Rnf157	5.79498	6.03146	6.84367	6.7704	6.90157	6.89522	3.45843	2.16808	3.07044	3.11391	3.54189	3.39541	3.74248	3.32504	3.40465	3.92711
Cep170b	5.9516	6.20161	6.64532	6.63455	6.88024	6.91987	4.91643	4.18656	4.30199	4.30852	4.35834	4.53605	4.50809	4.1562	4.87079	4.36463
Zfp385a	7.09404	6.42048	6.2013	6.26877	6.35553	6.87855	1.82575	1.92594	1.77138	1.77458	2.98551	2.85516	3.06345	2.89121	2.5809	2.82976
Magee1	5.97573	6.17131	6.83846	6.83531	6.7665	6.5835	4.14208	5.398	3.61918	4.31639	4.41394	4.41426	4.19166	4.48059	4.37891	4.11587
Ccdc141	6.81659	7.28307	6.35582	6.23709	6.31865	6.14486	5.21934	3.84694	4.17274	4.56111	4.76872	4.49459	4.46734	4.62592	3.98534	4.30968
Wasf3	5.17006	5.52281	7.1795	7.10224	7.19482	6.94187	2.55992	3.56953	2.65245	3.10788	1.42338	1.11426	1.28078	1.54767	1.29734	1.13553
Scn4b	5.72268	5.96859	6.96486	6.97905	6.83955	6.61906	0.98333	1.04532	1.15741	1.00944	2.70262	2.65461	1.7377	1.76411	2.88465	1.91587
Slc8a2	5.11029	5.81796	6.97597	6.94023	6.99672	7.20513	1.46517	1.10476	0.98333	1.47063	1.05502	1.05028	1.1397	1.14641	0.98333	0.98333
Lef1	7.16815	7.74667	6.00052	5.90973	5.88629	6.32925	2.82225	1.99039	1.40771	2.55504	1.05502	0.98333	1.07917	1.14641	0.98333	1.03587
Nfasc	5.16167	5.82485	7.13632	7.082	6.91189	6.90394	1.24427	1.10476	1.10169	1.10941	1.05502	1.11426	1.07917	1.14641	1.09577	1.11125
Pclo	5.74532	6.3538	6.96698	6.93741	6.81277	6.19134	0.98333	1.41761	1.69812	2.59006	1.12332	0.98333	0.98333	0.98333	1.04064	1.11125
Lancl1	6.11042	6.11437	6.64929	6.70573	6.60248	6.77329	3.89841	4.37939	3.57893	3.76598	4.71993	4.94955	4.82157	4.85549	4.4361	4.62684
Arhgef25	6.37819	6.10874	6.65522	6.67227	6.68573	6.45324	5.37734	3.19872	5.52653	5.53803	4.01613	4.12695	3.9341	3.76242	4.29307	3.91664
Sh3bp1	5.41913	5.71299	6.79255	6.80167	7.17471	6.98533	5.59185	3.48257	4.60726	4.76454	2.87099	3.40823	3.23972	3.48602	3.06812	3.45886
Slc47a1	7.62245	7.21481	5.60639	5.27886	6.23373	6.91488	1.24427	1.04532	0.98333	0.98333	2.96705	3.15804	3.40913	3.3916	3.04029	2.86649
Tro	5.64055	6.20865	7.00258	6.90897	6.91608	6.18005	1.46517	2.08197	1.58073	2.34551	1.12332	1.39746	1.54974	1.54767	1.29734	1.51445
Snca	5.78682	6.09361	6.59614	6.65182	6.73832	6.92889	3.50898	2.22275	2.46642	3.08963	1.12332	1.23429	1.35924	1.54767	1.17469	1.56894
Chn2	6.05714	6.48131	6.45589	6.44154	6.60537	6.73779	4.48282	4.62753	4.84219	5.22219	4.36541	4.47644	4.30503	4.40204	4.0738	4.68351
Trnp1	5.55985	5.27045	6.86145	6.79236	7.27256	7.0136	1.24427	1.21675	1.45295	1.37344	1.25093	1.17552	1.65717	1.86126	1.41038	1.39886
Tmem151a	5.37627	5.54244	6.82332	7.01152	6.86728	7.12456	3.17513	1.99039	3.35891	2.87208	1.47657	1.05028	1.45763	1.54767	1.38847	1.47693
B4galt6	5.43662	5.69305	6.79374	6.77355	7.09711	6.94232	5.05896	3.77559	4.88408	5.24159	3.29777	3.77772	4.41931	4.48059	4.29307	4.7261
Khdrbs3	5.86899	6.00543	6.58167	6.50373	6.68135	7.07584	4.75826	2.89636	4.08206	4.11766	3.69561	3.80706	4.1518	4.01554	3.75645	3.60946
Stk39	6.9259	6.46083	6.18225	6.11291	6.28441	6.73058	3.2952	2.82746	3.31057	3.17286	4.80036	5.00545	5.21176	4.94686	4.77272	5.04085
Adcyap1r1	5.02035	5.3929	7.13585	7.24788	7.47398	6.42482	1.82575	2.22275	1.62093	2.17142	1.92226	1.71884	1.9887	1.86126	1.75667	1.65543
Slc25a22	5.90713	6.22783	6.60025	6.45341	6.77936	6.71763	4.04264	5.09141	3.51638	4.0965	4.73637	4.69618	4.40705	4.61202	4.42269	4.54084
Pde1b	5.65556	5.90068	7.02516	6.82622	6.7665	6.46879	2.23904	1.21675	2.0905	1.41311	1.62529	1.75942	1.81398	2.26792	1.29734	1.551
Unc13a	5.69679	6.2988	6.99012	7.04065	6.51783	6.06772	0.98333	1.21675	0.98333	1.26923	1.62529	1.87474	1.45763	1.65994	1.38847	1.25114
Il34	7.35267	6.81684	5.94456	5.8571	6.32568	6.3052	4.81962	3.04031	4.55116	4.3423	1.71655	1.54404	1.48121	1.76411	1.49483	1.27319
Gnai1	6.06615	6.15501	6.60842	6.44154	6.59552	6.72178	3.69513	4.36731	3.53753	3.6421	3.43846	3.69645	3.8819	4.11739	3.58404	4.61178
Nrxn3	5.18256	5.65749	7.1927	7.07945	6.79211	6.59432	1.46517	1.10476	0.98333	1.4893	1.25093	1.39746	1.33356	0.98333	1.47417	1.45781
Mboat7	5.83773	6.03938	6.48801	6.46127	6.76805	6.89153	3.45843	4.7064	1.58073	2.30392	4.23257	4.46422	4.75299	4.6533	4.57836	4.62041
Mdk	6.64966	6.08789	5.951	5.99879	6.81727	6.9543	3.45843	1.92594	3.28578	2.56387	1.76011	1.67709	2.24438	2.6406	2.20822	2.19534
Kcnma1	5.24345	5.91581	6.89248	6.85334	6.90486	6.63679	1.82575	1.04532	1.66004	1.29069	1.05502	0.98333	1.01599	1.14641	0.98333	1.1594
Neurl1a	5.40498	5.75686	6.84828	6.79858	7.08058	6.5529	4.64981	3.025	4.3143	3.82231	1.12332	1.34509	1.35924	1.76411	1.47417	1.27319
Ppm1l	5.85605	6.02749	6.76964	6.55969	6.49618	6.70927	3.45843	3.94777	3.20874	3.62109	4.11169	4.07965	4.44952	4.61202	4.21119	4.51794
Gap43	5.34326	5.69556	6.69288	6.61356	6.71815	7.31691	1.97705	2.13994	2.48832	1.54392	1.76011	2.28929	2.12967	2.26792	1.61291	2.18374
Bcas1	5.06152	5.50577	6.95046	6.96254	6.99053	6.88088	1.46517	1.82352	2.17393	2.32487	1.12332	0.98333	1.1397	0.98333	1.22501	0.98333
Insyn1	5.54057	5.72531	6.78535	6.67565	6.82374	6.76475	1.24427	1.63479	1.361	1.4893	2.23165	2.49554	2.06871	2.33711	2.47053	2.12433
Chd5	5.40853	6.00946	6.86828	6.72869	6.60248	6.61291	3.35169	1.32067	2.30308	1.77458	1.18853	1.23429	1.10976	1.14641	1.14886	1.11125
Foxq1	6.32471	7.10405	6.19769	5.87486	6.04126	6.68604	3.11112	2.19567	2.32758	4.04693	0.98333	1.11426	1.28078	1.29292	1.06847	1.08656
Ramp1	5.99238	5.73021	6.48283	6.38897	6.95968	6.67375	5.81918	2.80971	5.6237	4.87518	1.31073	1.44799	2.00506	1.76411	1.32067	1.62146
Adam22	5.41561	5.86327	6.94724	6.9346	6.54881	6.50905	2.11398	1.92594	2.8682	2.71433	2.87099	3.2175	3.16887	3.21905	3.59365	3.5964
Smad3	6.93208	6.49433	6.03025	5.94377	6.30235	6.50845	5.18866	4.59681	4.98378	5.06921	4.15312	4.35591	4.23392	3.57463	3.98898	4.33873
Acsbg1	4.87398	5.60512	6.88801	6.73842	7.1751	6.91715	0.98333	1.46374	0.98333	1.13335	1.05502	1.05028	1.04793	1.42591	1.01227	1.00984
Dtna	5.2671	5.58903	6.91353	6.89454	6.87161	6.63072	4.17376	3.39004	5.67233	5.70212	3.25274	3.17313	3.35909	3.5457	2.96086	2.92337
Cacnb4	5.3246	5.95401	6.83382	6.77355	6.66036	6.60843	0.98333	1.16184	0.98333	1.13335	1.52787	1.11426	1.38447	1.29292	1.22501	1.08656
2019-09-06	7.07741	6.32656	5.89081	6.03082	6.14826	6.68071	4.55676	4.26029	3.79637	4.86985	2.1684	2.3961	2.87156	2.84445	2.82065	2.9023
Hap1	5.23147	5.58633	6.84193	6.74488	6.91981	6.82059	5.33593	5.26754	4.67565	5.77528	3.89437	3.82629	3.82313	4.07751	3.41553	3.70583
Fam19a5	5.58202	5.56455	6.63335	6.63108	6.86439	6.8264	1.6567	1.36996	1.73521	1.78973	1.8834	1.94679	1.93847	1.29292	1.9782	1.91587
Rgs17	4.78939	5.09546	7.07075	7.11724	6.97943	7.01063	1.6567	1.67456	3.35891	2.97505	1.25093	1.44799	1.67773	1.86126	1.32067	1.18289
Homer1	5.67926	6.47986	6.23161	6.43358	6.32989	6.89246	2.46068	2.49125	2.2528	1.86316	3.55432	3.43353	3.50428	3.68491	3.49969	3.62669
Klc2	5.94184	6.24505	6.32803	6.22329	6.47862	6.82591	2.23904	3.67133	3.18212	2.63269	4.19339	4.03076	4.00089	3.83597	4.11774	3.93058
Dnm3	5.5243	6.02749	6.79195	6.78612	6.52212	6.3867	3.11112	2.59852	3.40568	3.20146	4.66942	4.47644	4.4525	4.36938	4.86287	4.59656
Bcan	4.63432	5.22258	7.27206	7.17332	7.03326	6.68391	1.46517	1.26965	1.77138	1.57922	0.98333	1.11426	1.16904	0.98333	1.09577	1.03587
Cap2	5.0388	5.83625	6.74636	6.65867	6.69064	7.0463	1.97705	1.63479	2.2528	2.36587	3.4911	4.02245	4.63967	4.89043	3.89498	4.14606
Lrig1	5.56304	5.43851	6.90968	6.89744	6.97228	6.19434	3.17513	4.2733	1.87474	2.79911	4.49351	4.63206	4.72363	5.06374	4.80202	4.90092
Sptbn4	4.95389	5.63938	7.2143	7.06663	7.59996	5.49458	0.98333	0.98333	0.98333	1.57922	1.05502	1.34509	1.04793	1.29292	1.09577	1.13553
Inpp5f	5.89453	5.98713	6.59888	6.6891	6.4742	6.28847	4.29394	4.01127	4.14544	3.83696	3.97975	3.91877	4.20942	4.35277	4.55397	4.50402
Wasf1	5.35066	5.82485	6.74636	6.74165	6.64976	6.61459	0.98333	1.46374	0.98333	1.50774	0.98333	0.98333	1.1397	0.98333	1.01227	1.11125
Pcdh7	5.92706	5.80873	6.43765	6.46518	6.59202	6.68764	2.65276	3.70052	1.69812	1.71236	4.54422	4.45807	4.98927	4.95788	4.79162	4.97342
Lrrc4b	4.81636	5.53685	6.70437	6.79547	7.00506	7.05251	0.98333	1.04532	1.31274	1.10941	1.5774	1.87474	2.24438	2.74612	1.82351	2.02386
Rida	5.64957	5.57275	6.49464	6.41752	6.84592	6.8678	4.2351	4.75822	2.55208	4.37531	3.79318	4.07162	3.90388	3.90595	4.01066	3.62669
Hsf2	9.50285	9.62768	4.73149	4.55525	4.78451	4.64347	5.49486	4.39138	4.99911	4.74913	6.91933	4.32244	3.64666	3.45523	3.80274	3.82258
Slc6a9	6.52112	6.17311	6.19678	6.13272	6.39016	6.42482	5.86841	3.36595	5.01805	5.45139	2.06801	1.75942	2.29848	1.54767	2.02155	2.44886
Gramd1b	5.48449	6.0898	6.58582	6.45341	6.64527	6.49028	4.91643	3.2123	4.08206	4.62795	3.87469	3.75783	3.69284	3.65812	3.65916	3.43461
Cmbl	7.41223	6.34743	5.61454	5.50852	6.25082	6.60674	1.97705	3.05545	2.11885	2.74574	3.4911	3.12736	3.65705	3.603	3.68185	3.06914
Ntrk3	5.9613	5.96028	6.61655	6.63455	6.37532	6.17019	1.97705	1.26965	1.58073	1.93304	1.12332	1.23429	1.07917	1.54767	1.29734	1.206
Fzd3	5.25138	5.38049	6.91133	6.84135	6.89307	6.38931	5.37734	3.69085	5.87913	5.70312	1.71655	1.58976	2.60794	2.19524	2.24527	2.35892
Gng7	5.61619	5.94561	6.60093	6.62759	6.5685	6.27721	1.97705	1.32067	1.04372	1.50774	0.98333	1.23429	1.43365	1.42591	1.20007	1.51445
Arhgap44	5.68513	5.81796	6.49685	6.40942	6.65479	6.56915	5.37734	3.12886	4.76357	4.53663	2.58645	2.99767	3.26031	3.06442	3.10889	3.13082
Gkn3	6.63912	7.41367	5.99325	6.08776	5.65015	5.84561	2.46068	2.446	1.361	2.51914	2.91018	3.64323	4.20942	4.11739	3.53003	2.85922
Stum	5.42965	5.65234	6.52808	6.61356	6.78804	6.61291	1.46517	1.41761	1.53938	1.22535	1.18853	1.29075	1.7377	1.54767	1.47417	1.58666
Sdc2	6.99245	6.46377	5.81864	5.90397	6.11617	6.32173	4.81962	3.53753	4.62219	4.73941	3.36983	3.39541	4.1518	4.17521	3.8516	3.82631
Tyro3	5.22746	5.64975	6.81804	6.86819	6.41411	6.60562	1.97705	2.24934	2.00195	1.22535	2.4601	2.37013	2.57544	2.33711	2.70131	2.681
Pde4a	5.69969	5.98713	6.47614	6.58508	6.71226	6.09843	4.48282	4.34899	4.57181	4.64886	4.47402	4.56496	4.06081	3.81187	4.09762	3.70177
Prrt1	5.13621	5.31352	6.84943	6.74165	6.61574	6.89015	3.97233	1.8926	3.40568	3.11991	1.36815	1.54404	1.48121	1.65994	1.61291	1.47693
Shisa4	5.24345	5.16946	6.75682	6.81093	6.74725	6.7526	2.46068	2.22275	2.50988	2.48232	2.03293	1.87474	2.02124	2.19524	1.70442	1.85869
Ube2ql1	5.0388	5.64198	6.54806	6.45734	6.74042	7.05209	1.97705	1.59389	0.98333	1.03509	1.5774	1.83731	1.77635	2.40313	1.70442	1.65543
Lrp8	5.63146	6.14404	6.45287	6.50753	6.36034	6.32379	2.11398	1.46374	2.37536	1.4893	1.52787	1.11426	1.28078	1.29292	1.38847	1.27319
Ntsr2	4.68203	4.86988	7.22142	7.31228	7.01641	6.30797	0.98333	1.10476	1.04372	0.98333	1.25093	1.67709	1.45763	1.65994	1.24953	1.27319
Dixdc1	6.1639	6.29715	6.40046	6.28656	6.06078	6.18458	3.17513	2.91308	3.22187	2.32487	2.61045	2.67596	3.0867	2.98041	2.77071	3.18417
Lonrf2	5.47437	5.89415	6.38943	6.55969	6.61172	6.45199	0.98333	1.10476	2.17393	0.98333	1.80239	1.39746	1.77635	1.65994	1.45322	1.47693
Bend6	5.369	5.50291	6.59477	6.54867	6.79515	6.55173	1.6567	1.32067	1.10169	1.78973	1.12332	1.11426	1.22599	1.29292	1.04064	1.13553
Lrp11	5.12331	5.43552	6.64731	6.53384	6.70419	6.90348	3.40605	3.08526	2.30308	2.74574	3.77206	3.58797	3.30064	2.98041	3.55483	3.52008
Lzts3	5.78409	5.70056	6.41529	6.31719	6.556	6.5703	1.6567	2.51335	1.80666	1.57922	3.0571	3.20287	2.95814	3.3587	3.06121	3.07543
Lrrn3	5.50453	6.00543	6.56846	6.51132	6.01714	6.73161	2.55992	2.9939	2.63293	4.30852	1.12332	1.05028	0.98333	0.98333	1.01227	1.00984
Tnik	4.99224	5.71546	6.79732	6.78924	6.61287	6.42227	3.35169	5.66805	4.94868	5.65637	2.70262	2.89212	2.8077	2.9365	2.60009	2.82976
Tmeff2	6.48291	5.88978	6.17859	6.2	6.13231	6.43626	3.35169	4.88653	2.85141	4.90331	2.20038	2.54281	2.51959	2.52674	2.06364	2.57848
Gria3	5.44009	5.78067	6.87902	6.85632	6.27573	5.97755	3.23641	2.69836	1.73521	2.90722	1.62529	1.29075	1.43365	1.86126	1.43196	1.31631
Anks1b	5.15746	5.5782	6.78355	6.73194	6.6797	6.27651	0.98333	1.10476	0.98333	0.98333	1.67165	1.67709	1.57187	1.86126	1.32067	1.62146
Syngr3	4.72821	5.31678	6.5523	6.61356	6.87305	7.06647	0.98333	1.04532	1.04372	1.41311	1.25093	1.23429	1.25364	1.65994	1.47417	1.39886
Speg	5.47775	5.86994	6.68388	6.42557	6.51352	6.15027	2.82225	1.8926	2.27816	1.6306	5.19487	4.76257	4.18449	4.41809	4.02493	3.81132
Pianp	4.94902	5.15131	6.6572	6.64839	6.68354	7.00594	0.98333	1.21675	1.53938	1.20289	1.05502	1.23429	1.54974	1.29292	1.04064	1.27319
Colec12	7.2663	6.86441	5.36229	5.50852	5.70834	6.38407	4.32248	3.36595	4.28332	4.17069	3.82429	3.9277	4.0841	4.33597	4.56865	4.94107
Crtc1	5.40853	5.73996	6.44376	6.63108	6.61402	6.24434	2.74	3.47133	2.76436	3.40696	3.59096	3.72747	3.82313	4.11739	3.73924	3.88118
Dusp26	4.811	5.10303	6.80387	6.74809	6.66702	6.94232	4.14208	2.446	4.43195	5.42859	1.92226	1.87474	3.0077	2.9365	2.13116	2.47763
Ggact	7.20536	6.71055	5.55936	5.30529	5.92939	6.34619	2.55992	2.22275	0.98333	2.38594	2.68013	2.75836	3.1321	3.14381	2.68343	2.79208
Adap1	5.28652	5.68551	6.54664	6.64839	6.63568	6.24145	4.53253	2.24934	3.74273	3.38219	1.71655	1.29075	1.40927	0.98333	1.27363	1.25114
Shank2	6.50629	7.05608	5.99325	6.09282	6.32989	5.03972	2.55992	2.02156	2.17393	1.72817	1.05502	1.05028	1.01599	0.98333	0.98333	0.98333
Tpm2	6.22154	5.45931	6.5438	6.63455	6.24341	5.90534	3.93584	3.95586	4.75004	4.79676	3.23741	2.77825	3.95951	4.31896	3.16151	3.17833
2010300C02Rik	5.26319	5.70306	6.59614	6.48843	6.48617	6.46817	3.11112	3.56953	3.14125	2.08811	2.58645	2.47131	2.11467	2.40313	2.29322	1.91587
Ablim2	5.00637	5.36482	6.77993	6.6891	6.76753	6.39258	2.90007	2.22275	2.39867	2.54614	3.32702	3.90074	3.46933	3.14381	3.11557	3.35414
Rap1gap2	5.37627	5.90935	6.37512	6.38484	6.5691	6.38079	2.74	2.19567	2.53113	1.87741	3.83451	3.97154	3.64666	3.71121	3.73924	3.5565
Rgma	5.8767	5.53965	6.42072	6.32582	6.70311	6.06854	5.61511	2.57769	5.32227	5.3349	2.51198	2.69701	3.19763	3.29057	2.71017	2.92337
Scg5	4.93432	5.2191	6.54238	6.63108	6.78498	6.81622	1.46517	0.98333	1.49681	0.98333	1.05502	0.98333	1.22599	1.42591	1.27363	1.206
Mlc1	4.43989	5.19094	6.98803	6.94304	7.22145	6.13787	5.43075	3.41374	4.30816	4.40757	1.25093	1.17552	0.98333	0.98333	1.06847	1.00984
Pde1a	6.9686	6.40064	5.6347	5.63199	6.04468	6.23782	2.23904	1.59389	1.45295	2.51002	1.9601	1.67709	2.23053	1.86126	1.80709	2.06236
Slc7a2	6.99953	6.53269	5.79614	5.77123	6.08667	5.72129	5.92535	3.40194	5.03303	3.66692	2.74659	2.81721	3.42745	3.48602	2.93086	3.32804
Rragd	5.43662	5.49141	6.47763	6.57425	6.58501	6.29057	3.23641	2.05208	3.70583	2.83605	4.42751	4.42691	4.52521	4.61202	4.32226	4.18147
Crmp1	5.00637	5.67029	6.52304	6.54867	6.63001	6.46693	3.04414	2.27544	3.08488	2.40574	2.92939	3.01453	3.16159	2.69432	2.36229	3.10031
Gprasp2	5.47775	5.78067	6.57125	6.64494	6.42593	5.93788	0.98333	1.04532	1.62093	1.45171	1.36815	1.79889	2.02124	2.0379	1.8558	2.08747
Fgf12	5.22344	5.52563	6.46793	6.31719	6.39551	6.9044	0.98333	1.46374	1.04372	1.00944	1.47657	1.17552	1.81398	2.0379	1.38847	1.8732
Cacna2d1	5.09715	5.19803	6.8198	6.80167	6.56613	6.34686	3.11112	3.14311	4.33257	3.7698	4.33693	4.23161	4.70622	4.75793	4.40097	4.37487
1110051M20Rik	5.51774	5.4652	6.35014	6.35141	6.60595	6.52877	3.50898	3.7847	4.00821	3.97256	3.02175	2.83631	3.23972	3.3916	2.853	2.89521
Sphkap	5.43314	6.36801	6.29969	6.26877	6.39351	6.04881	1.46517	0.98333	2.14665	1.71236	1.05502	1.05028	0.98333	1.14641	1.01227	1.06143
Add2	5.13192	5.89633	6.37751	6.50373	6.43116	6.46755	1.82575	2.30107	3.08488	1.99969	2.65727	2.1126	2.71128	2.9365	2.71898	3.08792
Apc2	5.11898	5.88759	6.65457	6.64494	6.58793	5.91081	2.11398	1.63479	2.50988	1.9734	1.84346	1.63409	1.86865	1.65994	1.53527	1.49581
Kcnj3	4.9875	5.55353	6.56916	6.62759	6.61459	6.44886	1.46517	1.36996	2.48832	1.59655	3.4911	3.98015	4.43449	4.33597	4.39273	4.30166
Fam180a	7.40869	6.72412	5.01394	4.98394	6.22247	6.43182	2.55992	2.19567	2.32758	1.66386	1.18853	1.54404	1.30741	0.98333	1.41038	1.22875
Mag	4.52083	5.43251	6.86658	6.93177	6.34865	6.62017	1.6567	1.16184	2.70949	1.15691	1.05502	1.05028	0.98333	0.98333	1.04064	1.03587
Lingo1	5.11464	5.68803	6.48209	6.42958	6.25377	6.75006	1.82575	1.32067	1.04372	1.39341	1.18853	1.29075	1.35924	1.14641	1.12256	1.33739
Map7d2	5.42965	5.47107	6.40359	6.35984	6.33895	6.65865	0.98333	1.04532	0.98333	1.00944	1.05502	0.98333	1.1397	1.14641	1.01227	1.06143
Dlgap3	4.87911	5.73021	6.60706	6.57425	6.556	6.30312	0.98333	0.98333	1.66004	0.98333	1.42338	1.23429	1.54974	1.14641	1.34362	1.72108
Cyp1b1	7.5727	6.69309	5.1302	5.13892	5.57895	6.53351	2.90007	2.65925	1.04372	1.22535	4.02508	4.63751	5.13578	5.03279	5.01718	5.6877
Nrip3	4.82701	5.0413	6.5523	6.6891	6.78243	6.74649	1.46517	1.10476	0.98333	0.98333	1.12332	1.11426	1.01599	1.29292	0.98333	1.08656
Rap1gap	5.14048	5.76165	6.69672	6.64149	6.46467	5.91081	3.35169	3.19872	3.16862	2.44454	1.67165	1.63409	1.48121	1.29292	1.49483	1.39886
Lhfpl4	5.0388	5.49717	6.44299	6.50753	6.46084	6.63072	0.98333	1.85847	1.90761	0.98333	1.18853	1.23429	1.61515	1.14641	1.47417	1.56894
2019-09-05	6.02974	6.28555	6.0986	6.05178	6.17576	5.86172	0.98333	1.82352	1.90761	1.35319	1.31073	1.29075	1.52725	1.76411	1.38847	1.39886
Rnd2	5.31328	5.24329	6.5049	6.25979	6.79414	6.36625	3.65079	4.43255	3.04111	3.29465	2.70262	2.9806	3.20473	2.9365	3.06121	3.03082
Reps2	6.05034	6.05313	6.14432	6.25527	5.91361	6.04715	4.98945	4.50052	5.26317	5.07849	1.80239	2.14359	1.90398	2.11871	1.88739	2.20684
Grik5	5.06602	5.53685	6.60502	6.44551	6.61975	6.18608	5.81918	3.22575	4.54595	4.65921	2.26227	2.34368	2.31169	2.69432	2.23302	2.53351
Bbs4	5.66152	5.36797	6.30892	6.39718	6.38074	6.3231	2.74	3.50481	2.7463	3.44094	3.10855	3.06397	3.57174	3.51617	3.26734	3.50152
Kcnc3	4.87911	5.65492	6.53167	6.37656	6.47546	6.51566	2.23904	2.08197	2.8682	2.47297	1.18853	1.17552	1.22599	0.98333	1.09577	1.08656
Ddc	6.11694	6.58906	5.85575	5.80866	5.96405	6.09443	1.24427	1.21675	2.61314	2.12441	1.42338	1.49681	1.67773	1.86126	1.38847	1.41877
Polk	6.66161	7.07161	5.63336	5.53854	5.67238	5.8322	2.9739	3.62132	3.16862	2.65767	4.79513	4.46422	4.49657	4.3858	4.34234	4.45422
Wnt5a	7.33413	6.93507	5.23074	5.05834	5.59534	6.23782	2.90007	2.37536	2.37536	3.89764	1.71655	1.44799	2.17376	1.76411	1.70442	2.02386
Mpp2	5.28266	5.53685	6.19497	6.23709	6.50921	6.61123	3.23641	2.94596	3.31057	3.25155	3.19043	3.08008	3.30725	3.29057	3.44236	3.71794
Plppr2	5.01104	5.32328	6.45816	6.40535	6.58149	6.58978	3.2952	2.39929	2.06159	2.35573	2.78926	3.11177	2.97485	3.32504	2.96086	3.04371
Nrcam	4.52738	5.03339	6.78415	6.92894	6.61459	6.4805	1.6567	1.59389	3.12736	2.11241	1.47657	1.54404	1.61515	1.76411	1.77367	1.51445
Prkcz	5.57572	5.5618	6.27336	6.40535	6.44801	6.08477	3.89841	3.09995	2.72801	3.03348	2.43345	1.98151	2.77945	2.40313	2.93842	2.53351
Afap1l2	6.15547	7.10311	5.71768	5.7066	5.63437	6.02544	1.82575	4.26681	2.11885	2.73012	3.03953	3.2175	3.35271	3.18192	3.18712	3.51083
Kcnip3	5.76483	5.74481	6.08987	6.07757	6.18739	6.46321	1.24427	1.92594	1.04372	1.39341	2.06801	2.08093	2.48501	2.52674	2.92326	2.82976
Tcf7	6.13633	6.95613	5.74018	5.86896	5.47653	6.14176	3.35169	5.94913	3.05585	3.37217	1.5774	2.34368	1.86865	2.33711	1.63168	2.12433
Matk	4.8893	5.20156	6.92558	6.9346	6.45444	5.898	2.46068	0.98333	2.17393	1.57922	1.18853	1.29075	1.10976	1.14641	1.06847	1.1594
D430041D05Rik	4.77845	5.33619	6.44147	6.44947	6.43896	6.85176	2.90007	1.36996	2.90122	1.87741	0.98333	1.05028	1.01599	1.14641	1.01227	0.98333
Sez6	4.49435	5.00133	6.80979	6.73519	6.66092	6.58408	0.98333	0.98333	0.98333	0.98333	2.1684	2.34368	2.65017	2.26792	2.4389	2.21825
Dgkb	4.65239	5.27381	6.73769	6.814	6.44737	6.34619	1.6567	1.50844	0.98333	1.24746	1.05502	0.98333	1.10976	1.14641	1.14886	1.03587
Pdzd4	5.10154	5.35851	6.40907	6.51132	6.59319	6.29686	2.35411	2.96212	3.01117	4.16198	3.62669	3.44602	3.5496	3.48602	3.75645	3.7847
Cyp46a1	4.93432	5.37424	6.56636	6.42155	6.51106	6.44823	2.11398	0.98333	2.69073	1.37344	1.12332	0.98333	1.04793	1.14641	1.12256	1.03587
Arhgef4	5.0296	5.5782	6.50563	6.44947	6.50178	6.16256	1.46517	1.59389	0.98333	1.45171	1.25093	1.39746	1.30741	0.98333	1.22501	1.35817
Slc2a3	4.68203	5.38981	6.32389	6.40535	6.6048	6.81719	3.65079	2.37536	3.75181	3.2295	2.94834	2.79786	3.03186	3.48602	3.31458	2.99146
Fam131b	4.86884	5.47691	6.39889	6.27324	6.66647	6.52044	0.98333	1.16184	0.98333	0.98333	1.05502	1.05028	1.16904	1.42591	1.14886	1.13553
Metrn	4.76744	4.82936	6.81804	6.65182	6.89969	6.19882	4.67216	3.12886	5.58103	5.30885	3.14186	3.15804	3.80455	3.51617	3.40465	3.08792
Syt2	4.69371	5.52844	6.3807	6.35984	6.50115	6.68498	1.6567	0.98333	1.58073	1.52595	0.98333	0.98333	1.01599	0.98333	0.98333	1.03587
Cadm2	4.96357	5.73021	6.63802	6.59582	6.32428	5.88879	1.24427	1.16184	0.98333	0.98333	0.98333	0.98333	1.04793	1.29292	1.09577	1.00984
Aldh5a1	5.23548	5.60512	6.30137	6.36823	6.44543	6.17702	4.2351	3.00954	4.61226	4.47706	3.68435	3.82629	4.04903	4.19399	3.72183	3.74186
Sprn	5.0296	5.23642	6.34199	6.2279	6.45573	6.82543	0.98333	0.98333	0.98333	0.98333	1.05502	0.98333	1.16904	0.98333	1.14886	1.1594
Slc4a10	6.9746	6.91692	5.68325	5.51609	5.49661	5.52702	1.24427	0.98333	2.03208	0.98333	0.98333	0.98333	0.98333	0.98333	0.98333	0.98333
Ogdhl	5.09274	5.35534	6.53596	6.48843	6.58031	5.98881	0.98333	1.04532	0.98333	1.15691	4.20919	4.40789	3.62035	3.51617	3.84357	3.36957
Erc2	5.40853	5.58362	6.28276	6.29977	6.37871	6.05706	1.24427	1.46374	2.2007	2.2057	1.31073	1.05028	1.04793	1.14641	1.09577	1.06143
Ptprz1	4.30165	4.98092	6.99896	7.03276	6.99363	5.70248	1.24427	1.50844	1.53938	2.06339	1.05502	1.05028	1.10976	1.54767	1.01227	1.08656
Cacng4	5.08389	4.66512	6.45665	6.43358	6.63285	6.72541	1.6567	1.26965	3.65834	3.33651	1.12332	1.44799	1.01599	1.14641	1.34362	1.47693
Negr1	5.01571	5.56455	6.3918	6.49992	6.27282	6.20626	1.24427	1.41761	1.73521	1.59655	1.5774	1.34509	1.88642	1.95228	1.75667	1.56894
Slc9a2	6.94313	6.6956	5.04037	5.18709	5.60924	6.43816	0.98333	1.10476	0.98333	1.22535	1.42338	1.29075	1.54974	1.29292	1.53527	1.51445
Usp11	6.14061	5.9561	6.017	5.8982	6.09163	5.80991	5.21934	3.75718	4.63697	4.5589	1.92226	2.01542	2.62921	1.95228	2.23302	2.50584
Daam2	4.89943	5.24329	6.5288	6.54498	6.82523	5.87017	3.11112	2.42284	1.80666	3.43613	1.80239	1.83731	2.05306	2.26792	1.90293	2.21825
Tgfa	5.9516	6.53689	5.82567	5.77753	5.76737	6.0017	3.85998	3.56953	2.94937	3.34166	2.83071	3.40823	3.48108	2.84445	3.38266	4.00494
Ttyh2	5.84299	6.27049	6.03935	6.14741	5.67348	5.88508	2.46068	3.23907	3.12736	2.38594	4.11169	3.9277	4.08025	3.65812	3.99986	3.79617
Cxadr	7.37371	6.58501	5.31644	5.45444	5.4277	5.70037	5.51973	3.67133	4.36251	3.85867	2.68013	2.96334	2.96652	2.19524	2.89246	2.76121
Gabrb3	4.43293	5.22258	6.56706	6.73519	6.51291	6.36359	0.98333	1.04532	1.04372	1.50774	0.98333	0.98333	0.98333	0.98333	1.01227	1.08656
Fam163b	5.33209	5.50862	6.02822	6.1811	6.26039	6.48295	0.98333	0.98333	0.98333	1.00944	1.05502	1.11426	0.98333	0.98333	1.04064	1.00984
Cnr1	5.00168	5.39906	6.45211	6.53011	6.21112	6.19807	1.97705	1.16184	1.90761	1.03509	0.98333	0.98333	1.10976	1.14641	1.20007	1.206
Bri3bp	5.5243	5.3394	6.16941	6.24621	6.27863	6.232	4.17376	2.71753	3.05585	3.17286	3.20626	3.09601	3.35271	3.10466	2.95342	2.87372
Sgsm1	5.057	5.881	6.16849	6.02553	6.32779	6.30935	4.40488	3.14311	3.41714	3.59546	2.58645	2.49554	2.8077	3.10466	2.5809	2.55166
Slc39a8	6.65714	6.76288	5.63869	5.52361	5.36081	5.82352	3.8205	3.73854	4.44879	4.50715	1.9601	2.20365	2.8536	2.46626	2.74507	3.12477
Tmx2	5.5883	5.32652	6.05738	6.1029	6.34727	6.33129	2.74	4.21381	3.23488	3.33651	4.10326	4.08764	4.35375	4.51085	4.22052	4.14606
Kcnk1	4.55326	5.08402	6.37432	6.47685	6.7085	6.53706	0.98333	1.67456	1.77138	1.08506	0.98333	1.11426	1.07917	0.98333	1.09577	0.98333
Stx1a	4.86367	5.33619	6.37192	6.28656	6.3658	6.50423	1.6567	2.30107	3.01117	1.47063	2.74659	2.67596	2.29848	2.6406	2.64698	2.39959
Kif21a	4.87911	5.34898	6.4114	6.54127	6.422	6.0718	4.91643	3.88134	4.28332	4.83924	2.32161	2.56587	2.53094	2.6406	2.19566	2.44886
Opcml	4.86884	5.51147	6.42072	6.31719	6.31442	6.24072	1.46517	1.36996	0.98333	1.43254	1.18853	1.23429	1.25364	1.14641	1.24953	1.1594
Nova1	4.99697	5.06476	6.42613	6.41347	6.4493	6.31418	3.2952	3.05545	4.60225	3.89414	1.52787	1.63409	1.59367	2.0379	1.73946	1.67213
Fzd7	7.0852	6.60115	5.00777	4.95084	5.79297	6.19882	3.45843	3.44857	2.79981	2.88624	2.76809	2.85516	3.46933	3.57463	3.41553	3.86675
Rtl8c	6.00885	5.93291	5.6493	5.67991	6.05317	6.3052	1.24427	5.1205	0.98333	1.47063	4.32248	4.47644	4.04508	4.03649	3.95211	4.20173
Golga7b	4.99224	5.27045	6.35258	6.32151	6.50178	6.18156	1.24427	0.98333	1.21107	1.00944	0.98333	0.98333	1.04793	1.14641	1.01227	1.08656
Scn2a	4.91947	5.41132	6.54522	6.43358	6.25082	6.05294	1.97705	0.98333	0.98333	1.13335	1.52787	1.54404	1.33356	1.95228	1.53527	1.45781
Syt5	4.27856	5.12923	6.37751	6.25527	6.63964	6.92348	2.9739	2.94596	1.40771	1.56168	0.98333	0.98333	1.04793	0.98333	1.09577	1.03587
Tbx18	6.62851	6.23818	5.37353	5.50852	5.56951	6.26942	1.82575	1.21675	2.48832	2.07581	1.62529	1.87474	1.93847	1.42591	1.75667	1.91587
Mmp17	5.10592	5.23986	6.18589	6.27324	6.26698	6.49394	0.98333	1.8926	1.49681	1.35319	3.25274	4.02245	3.35909	2.9365	4.01781	3.74974
Ppp2r2b	5.1867	5.22258	6.30137	6.21402	6.22172	6.41072	1.24427	1.16184	1.53938	1.50774	1.12332	1.05028	1.07917	1.29292	1.12256	1.11125
Astn1	4.43989	5.00133	6.52376	6.67565	6.55061	6.36359	1.6567	0.98333	0.98333	1.00944	1.18853	1.29075	1.43365	1.14641	1.32067	1.11125
Slc35f2	6.27696	6.8076	5.56357	5.7328	5.32617	5.83509	0.98333	1.26965	0.98333	1.03509	1.31073	1.91121	1.50442	1.42591	1.41038	1.62146
Prune2	4.64639	5.16223	6.61453	6.42958	6.60248	6.05706	2.46068	1.67456	3.09918	2.01266	5.46869	4.42691	3.57723	3.603	3.81511	3.27439
Sgpp2	6.22355	6.88103	5.77571	5.8924	5.22901	5.50909	1.97705	3.05545	3.05585	1.22535	1.12332	1.49681	1.77635	2.11871	1.29734	1.43842
Gpx8	6.78006	6.06675	5.36068	5.10923	5.83003	6.35625	3.60505	3.96391	3.78757	3.63792	3.4518	3.27462	3.9637	4.11739	3.73491	3.44921
Cntn2	4.92444	5.26708	6.32803	6.52262	6.13551	6.21366	0.98333	0.98333	1.69812	1.26923	1.62529	1.49681	1.79529	1.14641	1.80709	1.37866
Kcna6	4.52738	5.10303	6.40907	6.42557	6.39885	6.49454	1.46517	1.46374	2.22699	2.37594	1.31073	1.23429	1.67773	1.86126	1.17469	1.43842
Camk1d	5.67632	5.71299	5.92286	5.77123	5.99084	6.26871	3.2952	2.63929	3.98529	2.93474	1.80239	1.91121	2.00506	2.52674	1.57461	1.84403
Psat1	4.66432	4.87873	6.3655	6.31719	6.61516	6.45886	3.23641	3.00954	2.55208	2.75349	4.49351	4.08764	4.75299	4.61202	3.51494	4.39763
Rnf208	4.92444	5.33297	6.05239	6.2325	6.33408	6.41971	2.9739	1.16184	3.18212	2.19437	1.05502	1.05028	1.07917	1.14641	1.01227	1.03587
Wnk2	5.23147	5.33297	6.23514	6.25979	6.19585	6.02797	1.46517	1.04532	1.21107	1.03509	3.02175	3.31602	3.12463	3.25525	2.47053	2.88808
Elovl6	4.46738	4.92219	6.32224	6.49227	6.33408	6.71919	2.74	3.55894	4.57181	4.07502	3.07446	2.49554	2.93271	3.25525	3.02617	3.07543
Adam11	5.00168	5.34898	6.48801	6.35984	6.21567	5.84083	0.98333	1.5518	1.97119	1.13335	2.03293	1.83731	1.85066	1.76411	1.80709	1.94364
Epdr1	6.11259	6.14036	5.57335	5.69332	5.83891	5.87485	1.24427	2.16808	1.87474	1.74381	2.58645	2.49554	2.56444	2.52674	2.14429	2.31708
Celf5	4.86884	5.28716	6.46643	6.53011	6.14349	5.93251	1.24427	1.04532	0.98333	1.52595	1.18853	1.34509	1.40927	1.42591	1.22501	1.27319
Ccdc92	4.97319	5.08784	6.11113	6.18585	6.33756	6.52996	3.55782	2.9781	1.53938	2.38594	2.92939	3.28855	2.61862	2.6406	2.78755	3.28528
Bcl11b	5.0388	5.33619	6.31059	6.28214	6.04893	6.20774	4.55676	2.24934	2.44419	4.20499	1.05502	1.11426	1.38447	1.42591	1.12256	1.206
Ipcef1	4.51426	4.8156	6.34444	6.29977	6.57678	6.63624	3.40605	1.95852	3.74273	3.42648	0.98333	1.05028	1.10976	0.98333	1.04064	1.00984
Armh4	6.11911	5.72039	5.42845	5.66638	5.77971	6.46321	2.35411	1.41761	3.98529	3.45526	1.42338	1.58976	2.15922	1.14641	1.65021	1.79914
Clmn	5.33583	6.0235	6.14432	6.06215	6.36785	5.24149	4.32248	2.80971	4.13159	3.58681	3.09161	3.47067	3.11713	2.84445	3.21228	3.9375
Fam213b	5.28266	4.79704	6.28105	6.32151	6.33756	6.15335	4.50789	2.65925	3.68702	2.96841	3.69561	3.47067	4.16278	4.31896	3.86356	3.31747
Tspoap1	5.40853	5.89851	6.42767	6.44154	6.13951	4.83418	2.65276	1.50844	1.90761	1.50774	0.98333	1.05028	0.98333	0.98333	0.98333	0.98333
Src	5.18256	5.44449	6.09279	6.00418	6.41872	6.00255	5.39088	4.35512	3.95416	4.90678	2.29225	2.49554	2.68105	2.69432	2.48092	2.681
Ust	6.88953	6.32008	5.09959	5.06866	5.62072	6.14641	2.35411	2.49125	1.97119	2.76885	1.25093	1.29075	1.25364	1.65994	1.34362	1.27319
Sobp	5.07498	5.06863	6.05738	6.03609	6.43116	6.45574	1.24427	1.41761	1.87474	2.40574	2.20038	2.04854	2.7603	2.79612	2.77915	2.72166
Pygo1	5.35803	4.88753	6.04939	6.1278	6.36853	6.32515	5.09249	2.845	5.20155	4.92919	3.07446	3.24634	3.23972	3.32504	3.39919	3.03082
Ppfia4	5.11029	5.16946	6.42459	6.55602	6.04041	5.79123	2.23904	1.67456	2.03208	3.05871	1.76011	1.67709	1.77635	1.95228	2.26944	1.551
Mpzl2	7.7691	6.84082	4.51367	4.44863	5.48661	5.99226	2.11398	1.5518	2.69073	2.02551	2.10226	2.37013	2.44959	1.95228	2.73643	2.52434
Foxp2	5.77861	5.45931	5.937	5.77123	5.75284	6.34146	3.55782	2.86232	4.50894	3.48348	2.35039	1.83731	3.09437	2.84445	2.20822	2.63065
Cds1	4.92939	5.15496	6.25437	6.2279	6.1178	6.32925	4.6271	2.82746	4.62714	3.27326	3.1253	2.69701	2.60794	3.14381	2.80419	2.71362
Asgr1	6.95774	6.0175	5.13964	5.04794	5.78687	6.06199	1.6567	1.59389	1.66004	2.34551	0.98333	0.98333	1.10976	0.98333	0.98333	0.98333
Camkk1	4.99224	5.17306	6.08108	5.91546	6.48868	6.31968	3.77991	2.65925	2.98061	2.814	2.26227	2.08093	2.11467	2.0379	2.02155	1.82922
Pgbd5	5.06152	5.41132	6.03531	5.9605	6.28369	6.19658	0.98333	0.98333	1.49681	1.08506	0.98333	1.05028	1.1397	1.14641	1.04064	1.08656
Caskin1	4.46055	5.00133	6.39653	6.31286	6.37329	6.40297	1.24427	1.21675	1.361	1.4893	1.12332	0.98333	1.10976	1.29292	1.06847	1.00984
Ttbk1	4.85849	5.72285	6.11878	6.10792	6.33408	5.79321	0.98333	1.21675	1.21107	0.98333	1.05502	1.05028	1.10976	0.98333	0.98333	0.98333
Itgbl1	6.70988	6.43255	4.79735	4.78546	5.61728	6.53233	2.11398	1.5518	1.31274	2.35573	3.42499	3.80706	4.59982	4.40204	4.21431	4.23019
Anpep	6.78962	6.20161	5.14152	5.14869	5.45745	6.12144	4.29394	3.53753	3.69646	3.51116	3.41139	3.80706	4.2984	4.24888	4.33663	4.45422
Etv1	5.1867	5.27045	6.12259	6.20936	6.12748	5.90442	1.97705	2.86232	2.67172	3.13778	2.06801	2.31674	2.94124	2.84445	2.41742	2.72166
Reep2	4.60986	5.09925	6.31726	6.24621	6.19662	6.33537	2.23904	1.95852	2.83441	2.36587	2.83071	2.54281	2.92413	2.89121	2.33963	2.66441
1500015O10Rik	6.79912	6.36171	4.95744	4.82253	5.5588	6.30381	0.98333	0.98333	1.2628	0.98333	1.25093	0.98333	1.33356	1.29292	1.09577	1.29491
Gpd1	4.57869	4.98092	6.22719	6.2	6.30306	6.50785	3.77991	3.18502	4.0456	2.37594	3.03953	2.69701	3.32039	3.06442	3.53003	2.4965
Agt	5.14048	4.88314	6.23338	6.17633	6.17809	6.16943	0.98333	0.98333	1.69812	0.98333	1.05502	1.11426	1.1978	1.42591	1.17469	1.11125
Fndc4	5.20722	5.47107	6.0801	6.04134	6.02234	5.95034	2.65276	2.11124	1.97119	2.50084	2.35039	1.83731	2.31169	2.0379	2.0774	2.31708
Dzip1	5.42264	5.64717	6.03126	6.09787	6.11374	5.39522	3.2952	2.845	2.67172	2.10031	1.47657	1.39746	1.54974	1.86126	1.41038	1.37866
Nalcn	5.44356	5.3004	6.04639	6.24621	5.85065	5.80698	1.46517	1.32067	0.98333	0.98333	1.52787	2.1126	2.06871	2.58479	2.36229	2.42935
Thbs2	6.44711	6.11249	5.24305	5.14869	5.48786	6.23927	4.29394	1.59389	2.44419	1.54392	3.41139	3.27462	3.73269	3.14381	3.47911	3.51546
Kcnt1	5.46075	5.4652	6.55724	6.37656	5.8986	4.91994	0.98333	1.10476	1.77138	0.98333	0.98333	1.17552	0.98333	0.98333	1.01227	1.1594
Lypd1	5.04337	5.51715	5.93375	5.8571	6.08833	6.22762	1.24427	1.36996	1.77138	1.26923	1.12332	1.17552	1.1397	1.14641	1.14886	1.08656
Ptprt	4.41187	5.02544	6.43841	6.41347	6.09328	6.26658	0.98333	0.98333	1.04372	0.98333	1.12332	0.98333	1.04793	1.65994	1.09577	1.11125
Cdkl5	4.78939	5.3394	6.24304	6.29098	6.02408	5.93788	4.6271	4.37939	4.22584	4.43432	3.41139	3.18808	3.52145	3.48602	3.64537	3.88834
Rims4	4.48766	5.5782	5.99117	6.10792	6.28874	6.17019	0.98333	1.16184	1.04372	0.98333	1.05502	1.11426	1.04793	1.14641	1.12256	1.18289
Gpr158	4.52738	4.9768	6.27678	6.25075	6.15143	6.43689	0.98333	0.98333	0.98333	1.15691	0.98333	0.98333	1.04793	1.14641	1.04064	0.98333
Cabp1	4.55326	4.9179	6.19859	6.24621	6.37938	6.29337	0.98333	1.36996	1.53938	1.45171	3.10855	3.27462	2.90682	3.25525	2.83692	2.97137
Bche	6.96016	6.74242	5.0444	4.98394	4.89453	5.96093	1.24427	2.13994	1.15741	1.52595	1.8834	2.08093	2.50816	1.65994	2.18299	1.99761
Adra2a	6.31717	5.98508	5.25526	5.15839	5.80509	6.05211	2.35411	1.26965	2.03208	2.27192	0.98333	0.98333	0.98333	0.98333	1.01227	0.98333
Arfgef3	4.75076	5.32328	6.39259	6.45341	6.08336	5.52107	4.35048	2.53512	3.68702	2.814	1.05502	1.23429	1.01599	0.98333	1.01227	1.03587
Kctd13	4.90949	4.90929	6.0673	5.8148	6.35553	6.46321	3.11112	3.11448	3.88982	3.65042	2.58645	2.49554	2.74089	2.9365	2.48092	2.75338
Sez6l	4.49435	5.00133	6.22099	6.16676	6.21112	6.4075	1.24427	0.98333	0.98333	1.00944	1.36815	1.23429	1.50442	1.54767	1.45322	1.551
Itpka	5.23947	5.70056	5.88858	5.84514	5.91641	5.90442	1.24427	1.75096	1.66004	1.31182	0.98333	1.05028	1.10976	0.98333	1.09577	1.18289
Actr3b	4.46055	5.00133	6.19044	6.27324	6.33338	6.19508	2.74	1.46374	3.02622	3.0078	2.91018	3.88248	3.69284	3.5457	3.49457	3.1607
Hepacam	4.42595	4.73502	6.40829	6.3724	6.63625	5.8683	2.90007	1.16184	2.27816	1.99969	1.31073	1.17552	1.25364	1.14641	1.20007	1.1594
Cntnap1	5.00168	5.15496	6.14244	6.28214	6.0974	5.73576	1.24427	1.32067	1.49681	1.35319	1.9601	1.94679	1.79529	1.54767	1.66851	1.63855
Slc16a11	6.3077	5.89633	5.42537	5.39826	5.6389	5.7337	4.07655	3.30391	3.90617	3.49276	1.5774	1.87474	2.00506	2.11871	1.57461	1.73703
Sphk1	7.15342	6.12557	4.83269	4.98394	5.48661	5.79716	3.17513	3.36595	3.20874	3.24607	3.31247	2.04854	2.23053	2.52674	2.60009	2.28488
Pcx	5.1784	5.39906	6.19316	6.05698	6.13551	5.4159	4.00791	2.57769	4.09639	2.49161	3.00374	3.57666	3.26031	3.06442	3.34334	3.06282
Tmem88b	4.60986	5.2191	6.19044	6.30851	5.97393	6.04798	1.6567	1.36996	2.27816	2.21695	1.36815	1.49681	1.1978	0.98333	1.20007	1.29491
Tmem119	6.9172	5.93504	4.76113	5.0163	5.52621	6.16943	3.8205	3.2123	3.41714	2.47297	1.36815	1.49681	1.43365	1.42591	1.61291	1.72108
Car11	5.00168	5.06476	6.31059	6.3344	5.94774	5.65542	1.46517	0.98333	1.62093	1.37344	1.42338	1.39746	1.45763	1.14641	1.34362	1.11125
Bdh1	5.3907	5.23297	5.91189	5.84514	5.93124	5.98967	1.46517	1.59389	2.0905	2.21695	4.20131	4.51843	3.56624	3.51617	4.33663	3.20152
Tmem229a	4.32438	4.70049	6.4215	6.44154	6.76443	5.64012	1.24427	0.98333	0.98333	0.98333	0.98333	0.98333	1.04793	1.14641	0.98333	0.98333
Cd248	5.78409	5.57002	5.74513	5.67316	5.4106	6.09282	1.82575	1.59389	2.11885	1.29069	2.1684	2.2613	2.57544	2.46626	2.0774	1.99761
Camk2n2	4.60368	4.94344	6.04839	6.1029	6.48868	6.07424	3.50898	3.30391	4.35657	3.50658	2.03293	2.71775	2.60794	3.06442	2.3846	2.4965
Smarcd3	5.41561	5.07249	6.1518	6.17155	5.90987	5.51748	4.20475	2.71753	3.99297	3.28934	3.75063	4.12695	3.9341	3.5457	3.80274	3.41986
Slc35f1	4.25509	4.71044	6.26648	6.24621	6.17887	6.58122	0.98333	0.98333	1.49681	1.22535	1.71655	1.39746	2.17376	2.11871	1.22501	1.76842
Adam23	4.33933	4.94344	6.32224	6.42958	6.29305	5.90076	4.00791	3.70052	3.08488	3.29995	3.26791	4.13468	3.79987	3.81187	3.10217	4.14904
Fam81a	4.76744	5.04916	6.07421	6.14253	6.08087	6.108	0.98333	1.63479	1.8411	1.94662	2.26227	2.08093	2.32479	2.58479	2.02155	2.39959
Lrrc4	4.62824	5.18738	6.11878	5.95495	6.20122	6.10402	1.6567	1.04532	1.49681	1.87741	1.05502	1.44799	1.65717	1.54767	1.32067	1.70494
Chst10	4.59747	4.96022	6.00981	6.20469	6.18352	6.19583	0.98333	1.26965	1.04372	1.18008	0.98333	1.11426	1.07917	0.98333	1.04064	1.18289
Plekha5	5.23947	5.38981	6.31643	6.32151	5.82409	5.02801	3.89841	3.43705	3.51638	4.06883	3.91379	3.87327	3.46933	3.21905	3.56463	3.82631
Foxp4	5.82981	5.3458	5.50491	5.54595	5.83596	6.04383	4.43133	3.5267	4.50894	4.64886	2.72478	2.69701	2.87156	2.11871	3.11557	2.95782
Rapgefl1	4.93924	5.36167	5.82567	5.69997	6.23522	6.02208	0.98333	1.16184	1.40771	0.98333	0.98333	1.05028	1.10976	0.98333	1.17469	1.06143
Sgip1	4.85329	5.4174	6.15831	6.17155	5.82508	5.64122	2.23904	4.04201	2.98061	3.71928	1.36815	1.63409	1.61515	1.86126	1.63168	1.67213
Rspo3	6.82591	6.13483	4.97441	4.96196	5.26457	5.89892	3.93584	3.11448	3.93834	4.39029	1.36815	1.58976	1.75715	2.11871	1.75667	1.99761
Micu3	4.55326	5.05698	6.21921	6.31286	6.09904	5.81771	1.6567	2.27544	2.35167	2.85778	2.68013	2.61092	2.55336	2.11871	2.4389	2.73761
Prkar2b	5.36169	5.50577	5.97861	5.91546	5.56595	5.72751	4.60404	3.11448	4.4432	3.69535	1.47657	1.39746	1.88642	1.54767	1.55508	1.8732
Maob	5.73969	5.9435	5.56777	5.40642	5.586	5.80306	5.18866	4.25374	3.90617	4.64471	2.85099	3.11177	3.15428	3.3587	2.83692	2.97137
Stau2	4.86884	5.03339	5.99533	6.01489	6.07002	6.04798	1.46517	2.59852	2.30308	2.1481	3.50397	3.75783	3.95951	4.13692	3.84759	3.71794
Tceal3	4.64037	4.98912	5.77934	6.03082	6.17498	6.41266	0.98333	1.41761	1.04372	1.31182	1.18853	1.11426	1.52725	1.42591	1.36622	1.43842
Klhl23	4.9875	5.06087	6.0514	6.04134	6.07337	5.80796	3.17513	3.12886	3.82246	4.45109	3.673	3.48284	3.62565	3.51617	3.19976	3.30682
Tmem8b	5.05247	5.07635	5.8975	5.8924	6.05994	6.01362	2.65276	3.22575	3.07044	3.97918	3.72887	3.57666	3.96788	3.99428	3.76922	3.85584
Degs2	6.22959	6.95926	5.26391	5.1192	5.25723	5.15493	1.24427	1.50844	0.98333	1.29069	1.71655	2.23276	2.70127	3.29057	2.46006	2.40958
Aif1l	5.61926	6.47403	5.72772	5.51609	5.0264	5.58068	2.65276	1.67456	2.14665	2.79911	3.20626	4.03902	4.56714	4.58383	3.29705	3.87399
Zfp354c	5.22746	5.14766	5.94563	5.95495	5.92384	5.73884	4.04264	3.59047	4.0603	5.01224	2.68013	3.15804	3.04774	3.14381	3.34902	3.60946
Slc38a5	5.94184	6.88103	5.22721	5.30529	5.18173	5.39131	5.49486	2.86232	5.16803	4.73159	0.98333	1.11426	0.98333	0.98333	1.01227	0.98333
Eml5	5.30569	5.57002	6.54947	6.53011	5.90706	4.05637	4.2351	1.67456	4.8758	3.89414	2.10226	1.87474	1.67773	2.11871	1.57461	1.72108
Dnajc27	4.95389	5.27045	5.8626	5.83913	6.06583	5.9226	2.46068	3.42544	2.11885	3.73502	3.14186	3.42094	3.61503	3.68491	3.27333	3.58762
Serpind1	6.98534	6.28222	4.74639	4.66817	5.27913	5.89709	0.98333	1.04532	0.98333	0.98333	0.98333	1.05028	1.07917	0.98333	1.01227	1.00984
Ric3	5.24742	5.00941	5.92286	5.83308	5.94317	5.89984	1.46517	2.08197	1.8411	2.12441	3.85474	4.05541	3.91691	3.68491	4.54904	4.26911
Ccdc136	5.05247	4.90496	5.99845	5.83308	6.0387	6.01531	1.6567	1.59389	2.78219	1.80472	1.92226	2.08093	2.37601	2.52674	2.28138	2.53351
Kcnd2	4.9875	5.34898	5.99429	5.9605	5.83497	5.68979	2.11398	1.10476	0.98333	0.98333	2.03293	2.47131	2.56444	2.40313	2.30496	2.35892
A230050P20Rik	4.89438	5.14031	6.26648	6.29098	5.81312	5.39392	3.23641	3.36595	3.66796	3.21835	4.15312	3.82629	4.05297	3.85968	3.84357	3.82631
Nr2f1	6.12775	5.881	5.38627	5.32265	5.70941	5.35562	3.11112	2.39929	4.34462	3.72717	2.63405	3.0312	2.49663	2.58479	2.31661	2.79208
Gnaz	4.39765	5.07249	6.04438	5.86896	6.14588	6.24939	4.07655	2.19567	3.41714	3.39711	1.31073	1.54404	1.35924	1.76411	1.82351	1.85869
Mark1	5.47437	5.42044	5.79256	5.75853	5.6479	5.63792	2.23904	2.08197	2.50988	2.69837	2.37861	1.58976	1.75715	1.76411	1.68658	1.56894
Dnal1	5.20314	5.51998	5.77329	5.86896	5.73816	5.62132	1.24427	3.26536	3.20874	2.76119	3.98893	3.73766	4.09179	4.01554	3.84759	4.41509
Tub	5.02035	5.68298	5.8897	5.64585	5.96765	5.50788	0.98333	1.36996	0.98333	1.18008	1.31073	1.39746	1.48121	1.54767	1.20007	1.47693
Ackr1	4.26296	5.47982	5.86032	6.03609	6.01453	6.02881	1.6567	2.05208	1.53938	1.15691	1.36815	1.49681	1.45763	2.19524	1.51519	1.29491
Ptbp2	4.75076	4.96438	6.23161	6.25979	5.82508	5.59888	2.82225	2.845	2.96507	2.28267	3.57885	3.40823	3.64666	3.71121	3.31458	3.87037
Sox2	3.7392	4.38351	6.41063	6.46127	6.81127	5.81673	2.11398	2.63929	3.68702	1.83424	0.98333	1.05028	0.98333	0.98333	0.98333	1.00984
Tenm4	4.35413	4.78767	6.30641	6.25075	6.09493	5.7833	2.23904	1.46374	1.87474	1.47063	1.05502	0.98333	1.01599	1.14641	1.09577	1.1594
Amph	4.44681	5.28384	5.85346	6.00418	5.85552	6.12772	1.46517	1.92594	1.80666	1.64732	1.05502	1.11426	1.16904	1.65994	1.04064	1.11125
Vat1l	4.19881	4.70548	6.01495	6.11291	6.09822	6.39062	0.98333	1.10476	1.04372	1.50774	1.05502	0.98333	1.10976	0.98333	1.09577	0.98333
Nat14	4.62824	4.64968	5.8245	5.84514	6.07086	6.49637	3.77991	2.53512	4.54595	4.29	2.29225	2.87376	2.79834	3.02303	2.96827	2.88808
Nyap1	4.43293	4.79236	5.89862	6.15227	6.19432	6.02376	1.6567	1.41761	1.8411	2.45408	1.25093	1.54404	1.1978	1.42591	1.43196	1.39886
Ppfia3	4.47417	5.20156	6.11496	5.8924	6.00054	5.80991	2.46068	1.16184	2.17393	1.24746	1.05502	1.11426	1.01599	1.14641	1.17469	1.18289
Eya2	6.85742	5.99529	4.80211	4.61281	5.24838	5.96795	5.10897	3.17118	5.14753	4.09345	1.31073	1.29075	1.28078	1.29292	1.36622	1.1594
D430019H16Rik	4.67615	5.14766	5.87847	5.84514	6.15775	5.72025	4.81962	2.16808	4.61226	4.88931	0.98333	0.98333	1.07917	0.98333	1.06847	1.08656
Rasd2	4.78393	5.42649	5.86829	6.06215	5.57895	5.69085	2.11398	1.50844	1.8411	2.10031	3.34143	3.85466	3.87301	3.90595	4.17964	3.6813
Slc2a13	4.67615	5.06863	5.86942	5.94377	5.74342	6.1072	2.11398	3.49373	1.45295	2.10031	1.47657	2.04854	1.86865	2.40313	1.87168	2.38953
Bmyc	4.60368	4.84299	5.75376	5.82702	6.1178	6.26016	2.23904	5.00436	1.87474	3.15543	3.36983	4.06354	4.1518	3.9727	3.7986	3.98837
Porcn	4.91947	4.92219	5.83383	5.99338	5.85163	5.85131	3.2952	3.53753	2.76436	3.24056	2.83071	2.63293	2.94124	2.6406	2.80419	2.82976
Vstm4	6.72277	6.01951	4.86717	4.81028	5.43161	5.4836	2.82225	3.19872	3.67752	2.76119	1.80239	1.75942	1.93847	1.86126	1.68658	1.73703
Rbp4	6.38361	5.9561	4.9617	4.77289	5.52255	5.7337	1.82575	2.446	2.53113	1.45171	1.18853	0.98333	1.25364	1.14641	1.01227	1.03587
Clcn2	6.33966	5.67792	5.52665	5.43063	5.09715	5.25446	0.98333	1.16184	1.62093	0.98333	1.62529	1.87474	1.71799	1.65994	1.61291	1.72108
Sms	4.29399	4.93922	6.01187	5.8924	6.0717	6.11355	3.89841	3.44857	2.88481	4.18794	3.61488	3.68597	3.91258	4.03649	3.39919	3.60512
Slc19a3	6.147	6.26206	5.1968	5.43063	4.74729	5.53768	0.98333	1.21675	1.04372	1.06029	1.05502	1.11426	1.22599	1.14641	1.04064	1.39886
Fjx1	4.09689	4.34571	6.24741	6.24621	6.66481	5.714	1.6567	2.02156	1.04372	1.71236	2.29225	2.1126	2.54219	2.52674	2.60009	1.90179
Robo2	4.94414	4.86988	5.96593	5.79006	5.623	6.10322	3.60505	2.4688	3.49491	2.88624	2.98551	3.90978	3.35909	3.25525	3.61267	3.74974
Bcat1	4.57869	4.87431	5.85575	5.90397	5.93216	6.12929	1.46517	1.04532	1.04372	1.10941	1.25093	1.23429	1.1397	0.98333	1.12256	1.1594
Col8a2	6.7454	5.96444	4.82335	4.77289	5.11674	5.8322	1.82575	1.7877	2.00195	1.13335	1.05502	1.23429	1.28078	1.65994	1.20007	1.1594
Olfm2	4.36879	4.58084	5.82567	6.06215	6.06331	6.34888	3.50898	5.54203	3.35891	3.85507	1.31073	1.44799	1.10976	1.14641	1.41038	1.06143
Cttnbp2	4.97319	5.3458	6.30557	6.39308	5.68337	4.54128	1.82575	2.05208	3.23488	1.75928	2.03293	2.20365	2.4733	2.40313	1.9782	2.66441
Cacna1a	4.83758	5.2086	6.07618	6.2325	5.88629	4.98886	1.46517	1.7877	2.32758	1.93304	1.25093	1.17552	1.61515	1.76411	1.43196	1.45781
Kcnab3	4.52083	4.78296	5.89305	5.79006	6.22172	6.00255	1.46517	1.26965	1.53938	1.71236	1.5774	1.44799	1.67773	1.76411	1.20007	1.39886
Tmem191c	4.58498	4.66512	6.11878	6.11789	6.03784	5.66625	3.40605	2.13994	4.0382	4.11164	1.42338	1.79889	1.77635	2.33711	1.57461	1.51445
Fzd1	5.94184	5.58903	5.18043	5.02692	5.7838	5.6684	2.11398	3.14311	1.87474	2.02551	3.42499	3.18808	3.32691	3.06442	3.78188	3.90609
Begain	4.21511	4.78296	6.11113	5.97154	6.17887	5.90534	2.35411	1.99039	1.04372	2.46355	1.25093	1.23429	0.98333	0.98333	1.27363	1.27319
Kndc1	4.55966	4.92219	6.24915	6.24621	5.98019	5.20333	3.35169	2.13994	2.22699	2.19437	0.98333	0.98333	0.98333	0.98333	0.98333	1.00984
Kcnd3	4.77845	5.06863	5.8315	5.69997	5.90143	5.8636	1.46517	1.46374	2.30308	1.00944	2.4601	2.42161	2.53094	2.19524	2.68343	3.10031
Cacnb1	4.36879	4.95604	5.90748	5.75214	6.05994	6.09763	4.04264	2.57769	3.65834	2.19437	1.67165	1.87474	2.02124	2.26792	1.94856	1.88756
Ggt7	4.48093	4.62359	6.25177	6.33012	5.87387	5.57264	1.82575	1.16184	1.2628	1.00944	1.05502	1.34509	1.22599	0.98333	1.09577	1.08656
Dcdc2a	6.26134	5.76881	5.00571	4.82253	5.226	6.00937	2.23904	1.82352	2.79981	2.73795	0.98333	0.98333	0.98333	1.14641	0.98333	0.98333
Chrm1	4.7619	5.1586	5.64401	5.72629	5.80207	5.96357	0.98333	1.36996	0.98333	1.66386	0.98333	0.98333	0.98333	0.98333	0.98333	0.98333
Fut9	4.38329	4.89191	6.26648	6.1953	6.15617	5.15493	0.98333	0.98333	0.98333	0.98333	0.98333	0.98333	0.98333	0.98333	0.98333	0.98333
Gabra3	4.75076	4.78767	5.81157	5.78381	5.96765	5.90899	1.6567	2.22275	2.35167	2.51914	0.98333	1.11426	1.48121	2.0379	1.53527	1.25114
Kcnh7	4.19058	4.6445	6.09473	6.1029	5.80911	6.16791	0.98333	0.98333	1.04372	0.98333	0.98333	0.98333	0.98333	0.98333	1.12256	1.11125
Fbxo34	6.21547	6.65108	5.05041	5.33125	5.50407	4.23866	1.97705	3.42544	1.66004	2.36587	4.05162	4.28123	3.74735	3.83597	4.0738	4.26637
Wnt6	6.61935	5.9435	4.65723	4.54049	5.56	5.65542	0.98333	1.46374	1.04372	1.59655	0.98333	0.98333	1.1397	1.14641	1.06847	1.06143
Tmem35a	4.33933	4.81098	5.83731	5.83913	6.09575	6.04798	2.46068	2.35102	3.11334	3.46944	1.52787	1.49681	1.67773	1.95228	1.51519	1.39886
Panx2	4.65837	5.00941	5.78175	5.79629	6.15932	5.53886	0.98333	1.04532	1.04372	0.98333	1.05502	1.05028	1.01599	1.29292	1.12256	1.1594
Slc16a4	6.09287	6.28055	5.25872	5.26994	4.78043	5.23277	0.98333	1.04532	0.98333	0.98333	3.36983	3.63235	3.42745	3.14381	3.56463	3.69362
Tmem178b	4.69952	5.12923	5.71389	5.84514	5.76737	5.74907	1.97705	0.98333	0.98333	0.98333	0.98333	0.98333	1.04793	0.98333	1.09577	1.08656
Lamc3	5.90963	5.74964	5.21119	4.93963	5.29784	5.79321	4.43133	2.55656	4.1862	5.38687	1.18853	1.05028	1.07917	0.98333	1.01227	1.13553
Rab3b	4.30927	4.47974	5.63736	5.79629	6.23448	6.39583	0.98333	1.26965	1.93975	1.47063	1.42338	1.17552	1.65717	1.29292	1.47417	1.551
Arxes2	4.57237	4.72033	5.78536	6.00955	5.88819	5.85794	3.93584	2.11124	3.04111	3.66282	1.5774	1.49681	1.67773	1.54767	1.29734	1.62146
Herc3	4.96839	5.30369	5.69225	5.90397	5.68008	5.273	2.35411	2.51335	1.97119	2.06339	3.0571	2.58857	3.14692	3.21905	3.2247	3.32277
Clmp	6.47108	5.90935	4.89418	4.88227	5.06052	5.57953	2.82225	1.5518	1.31274	1.64732	1.36815	1.67709	1.97215	1.54767	1.70442	1.76842
Gstm7	5.82185	6.11437	5.17126	5.0992	5.11511	5.44387	1.46517	1.5518	0.98333	1.6306	2.48627	2.79786	3.09437	3.29057	2.8288	2.56959
Arhgap33	4.4537	4.71539	6.01392	6.18585	5.86424	5.51629	1.24427	1.41761	3.01117	1.18008	1.42338	1.34509	1.67773	2.19524	1.22501	1.90179
Grm4	4.37606	4.97267	5.97545	6.07245	5.60462	5.73473	1.46517	1.16184	2.06159	1.13335	0.98333	0.98333	1.01599	0.98333	1.01227	1.03587
Gsg1l	4.41187	4.67531	5.83847	5.8571	5.97751	5.96533	2.11398	1.46374	1.93975	1.83424	1.92226	1.79889	1.92133	1.95228	1.96346	1.92982
Pak3	4.19881	4.69047	6.07814	5.90397	6.08087	5.7693	1.97705	0.98333	2.83441	1.75928	0.98333	1.17552	1.07917	0.98333	1.04064	1.03587
Kcnab1	4.64037	5.26708	5.92068	5.8148	5.61957	5.4539	0.98333	1.50844	1.21107	0.98333	1.18853	1.05028	1.28078	1.65994	1.12256	1.31631
Patj	5.07944	4.83392	5.48136	5.58961	5.76427	5.95476	4.97154	3.17118	4.69461	4.51856	2.4601	2.69701	2.56444	2.52674	2.54174	2.22957
Grin2c	4.19058	4.32643	6.35744	6.40535	6.21567	5.20184	0.98333	1.04532	0.98333	1.57922	0.98333	1.05028	1.28078	0.98333	1.09577	1.08656
Elovl7	6.03204	6.43855	5.06435	4.89393	5.01948	5.23568	2.11398	2.53512	3.08488	1.93304	1.80239	1.54404	2.02124	2.52674	5.08686	2.32766
Nwd1	4.0431	4.64968	6.15459	6.23709	6.30591	5.28851	2.23904	1.5518	2.61314	1.75928	1.25093	1.05028	1.25364	1.14641	1.04064	1.06143
Cit	4.33187	4.94765	5.87056	5.79629	6.00668	5.72129	3.17513	2.86232	2.81722	3.53382	3.39767	2.91026	3.20473	3.06442	2.68343	3.20152
Tnr	4.08807	4.96022	6.06433	6.02022	5.67238	5.84465	0.98333	1.16184	1.40771	1.18008	1.62529	1.23429	1.40927	1.29292	1.29734	1.29491
Gas1	6.85091	5.88539	4.47543	4.76021	5.13766	5.51988	3.23641	3.60083	2.79981	2.92791	3.10855	3.35626	3.92982	4.05715	3.71744	3.65635
Galnt16	4.12305	4.50854	5.86942	5.8982	6.21719	5.96883	1.24427	1.32067	0.98333	1.77458	1.42338	1.58976	1.45763	1.29292	1.32067	1.35817
Ak4	4.8323	5.53125	5.44072	5.53109	5.64678	5.60001	3.73814	2.67894	2.63293	3.44094	3.79318	3.53051	3.67761	3.63083	3.92953	3.48744
Snx32	4.72821	4.8017	5.96699	5.9825	5.58483	5.51509	1.97705	1.99039	0.98333	1.43254	2.4601	2.34368	1.97215	1.65994	1.96346	1.85869
Fzd2	6.34893	6.06868	4.55938	4.74741	5.44846	5.39782	3.8205	2.49125	3.7336	2.95503	1.62529	1.67709	1.93847	2.11871	1.70442	1.68863
Rnft2	4.47417	4.53117	5.90306	5.93815	5.7889	5.91445	2.65276	1.04532	1.04372	1.20289	1.31073	1.44799	1.1397	1.65994	1.22501	1.1594
Magi2	4.59747	4.79704	5.89193	5.73927	5.73816	5.78131	1.6567	1.5518	0.98333	1.50774	1.8834	1.39746	1.88642	2.0379	1.57461	1.53284
Fam20c	5.9021	5.37737	5.2076	5.05834	5.27768	5.71713	2.74	1.50844	2.94937	1.4893	2.74659	2.81721	2.88046	2.84445	2.36229	2.9023
Cacna1g	4.47417	4.86543	5.96805	5.86896	5.79499	5.56803	2.11398	0.98333	0.98333	0.98333	2.10226	2.23276	2.36338	2.46626	1.75667	1.85869
Flvcr2	5.68805	6.13298	5.30138	5.21524	4.91892	5.28289	1.6567	4.8609	2.96507	2.31443	1.92226	1.94679	2.15922	2.26792	2.83692	2.02386
Lgi2	4.41187	4.7735	5.75007	5.77753	5.97483	5.81771	5.24939	2.63929	4.08206	3.52027	1.36815	1.23429	1.40927	1.65994	1.53527	1.11125
Map9	4.57237	4.87873	5.7745	5.78381	5.55043	5.92891	2.74	2.49125	3.33494	2.92105	1.9601	1.98151	1.85066	2.26792	1.8558	2.95099
Ociad2	4.54683	4.88753	5.6884	5.71319	5.71585	5.9343	1.24427	1.71327	1.49681	2.03825	1.76011	2.1126	2.36338	2.46626	1.59389	1.99761
Kctd1	4.82169	5.03339	5.55795	5.67316	5.61843	5.76225	3.04414	2.08197	3.09918	3.00131	2.29225	2.67596	2.75062	2.98041	2.74507	2.76121
Susd4	4.38329	4.75439	5.85001	5.77123	6.00755	5.69932	2.9739	2.69836	2.91745	1.93304	1.5774	1.83731	2.38854	2.11871	1.63168	2.17205
Slc5a6	6.33966	5.74238	4.87171	4.84672	4.77427	5.84179	1.97705	1.71327	2.78219	2.01266	2.70262	2.85516	2.95814	3.14381	2.81244	2.50584
Hcar1	6.70844	5.86772	4.46946	4.46435	4.98259	5.9208	1.82575	1.26965	0.98333	1.03509	2.37861	2.34368	2.37601	2.19524	2.351	2.38953
Rell2	4.7053	5.03735	5.79016	5.77753	5.66131	5.38608	0.98333	1.10476	1.58073	0.98333	1.52787	1.23429	1.30741	1.14641	1.24953	1.1594
Syt12	5.8351	5.31352	5.10152	5.0992	5.30782	5.677	2.23904	1.67456	2.0905	1.64732	1.18853	1.05028	1.48121	1.54767	1.38847	1.31631
Adcy2	4.48093	4.50283	5.79733	5.94937	5.71692	5.88416	2.9739	2.30107	2.78219	2.69837	0.98333	1.29075	1.07917	1.14641	1.01227	1.06143
Sned1	5.95888	5.59441	5.39733	5.33125	4.55725	5.45265	4.14208	2.9781	3.66796	2.19437	3.34143	3.12736	3.26031	3.02303	3.12223	3.49684
Crym	4.16563	4.62359	5.77692	5.95495	5.78176	5.98276	2.82225	3.11448	2.00195	2.59006	1.42338	1.11426	1.22599	0.98333	1.49483	1.11125
Hcn2	3.89914	4.7735	5.82684	5.65957	6.21945	5.89892	0.98333	1.10476	1.04372	1.00944	1.99697	1.91121	2.44959	2.46626	2.09103	1.92982
Cpt1c	4.61601	4.88753	6.02109	5.99879	5.5965	5.14413	3.50898	1.5518	2.99597	1.87741	2.29225	2.31674	2.35063	2.26792	1.9183	1.92982
Robo1	6.10823	5.77594	4.81866	4.83468	5.08394	5.64012	2.23904	1.85847	2.42161	1.77458	1.25093	1.39746	1.63631	1.86126	1.20007	1.41877
1500011B03Rik	4.56603	4.19794	5.67159	5.80249	6.01714	5.99054	4.10969	3.61111	4.48736	4.19365	2.35039	2.56587	2.84454	2.6406	2.71898	2.91638
Fgfbp1	7.14706	6.20689	3.89199	4.13169	5.46511	5.39261	1.46517	1.59389	0.98333	1.56168	0.98333	1.05028	0.98333	0.98333	0.98333	0.98333
Gpc6	6.0594	5.47691	5.08599	4.99481	5.02295	5.59208	2.65276	1.99039	2.2007	1.9734	2.85099	2.81721	3.26031	3.78735	3.26133	3.56098
Lrrn2	4.07918	4.36473	5.75622	5.58961	6.15617	6.27862	1.24427	1.26965	1.90761	0.98333	1.67165	1.58976	1.77635	1.86126	1.68658	2.0108
Kcnh3	4.29399	4.9179	5.91519	5.87486	5.82607	5.35294	1.24427	1.71327	2.14665	1.06029	1.05502	0.98333	1.16904	1.14641	1.12256	1.06143
Necab1	5.15746	5.2805	5.48433	5.61096	5.15672	5.48482	0.98333	0.98333	0.98333	0.98333	1.12332	0.98333	1.1978	1.42591	1.01227	1.03587
Serp2	4.46055	4.45628	5.6884	5.67991	5.96765	5.90899	1.97705	1.71327	1.62093	1.22535	1.36815	1.11426	1.57187	1.14641	1.32067	1.1594
Prrx1	6.29049	5.70803	4.90307	5.02692	5.06725	5.12384	3.85998	2.37536	3.40568	3.15543	2.76809	3.11177	3.42137	3.14381	3.23701	3.1607
Pitpnm3	4.41892	4.92219	5.98595	5.90973	5.78992	5.08724	3.73814	4.03438	3.86493	3.68729	2.61045	2.69701	2.61862	3.02303	2.6744	2.78442
Asphd2	4.39049	4.79236	5.8021	5.65957	5.8777	5.59094	1.6567	0.98333	1.8411	1.6306	1.31073	1.11426	1.01599	0.98333	1.04064	1.03587
Alx4	6.91845	5.93716	4.24658	4.55525	4.78451	5.66193	0.98333	0.98333	0.98333	1.03509	1.05502	0.98333	1.01599	0.98333	0.98333	1.11125
Aqp11	5.78409	5.7783	5.1188	5.24285	4.89264	5.26448	3.69513	4.12329	4.51429	3.7583	2.40629	2.56587	3.0077	2.74612	2.75367	2.86649
Map7	4.82701	4.97267	5.92941	5.66638	5.59068	5.07753	2.90007	3.58003	2.78219	2.50084	2.37861	2.49554	2.67083	2.69432	2.18299	2.74552
Pcdh9	4.29399	4.49709	5.86146	5.7328	5.73076	5.9343	1.24427	1.04532	0.98333	0.98333	1.05502	0.98333	1.1978	0.98333	1.12256	1.11125
Ifitm1	6.23958	6.15319	4.67291	4.51052	5.1724	5.29411	2.35411	2.79174	2.57272	1.24746	1.36815	1.23429	1.1978	1.54767	1.14886	1.18289
Dtx4	5.19494	4.94344	5.45288	5.53854	5.35532	5.55293	4.83951	2.61905	4.51961	4.17934	1.42338	1.87474	1.90398	2.19524	1.94856	1.90179
Tmem184c	5.36169	5.09165	5.33463	5.15839	5.50034	5.54239	1.82575	3.2123	0.98333	1.20289	3.0571	2.65461	2.97485	3.06442	2.88465	3.1607
Nap1l3	4.68788	5.15496	5.46644	5.61096	5.43422	5.62465	0.98333	2.53512	1.04372	1.47063	2.56205	2.23276	2.35063	1.76411	2.5809	2.62208
Cacna1i	4.25509	4.85201	5.84194	5.83308	5.70941	5.47253	3.45843	1.59389	2.39867	1.54392	0.98333	0.98333	1.01599	1.14641	0.98333	0.98333
Fbxo44	4.46738	4.46806	5.71136	5.60388	5.97483	5.73061	0.98333	1.10476	1.80666	1.00944	1.52787	1.11426	1.1397	1.54767	1.57461	1.11125
Tpd52l1	5.63752	5.66774	5.06237	5.26994	4.99146	5.28711	0.98333	1.21675	0.98333	0.98333	1.76011	1.39746	1.59367	2.11871	1.55508	1.43842
Edil3	4.61601	4.9932	5.67289	5.50852	5.5201	5.6034	3.73814	5.58961	4.15915	3.95587	1.36815	1.94679	1.61515	1.14641	1.51519	1.51445
Arc	4.41187	5.79944	4.71138	4.65453	5.65797	6.6619	0.98333	1.59389	1.21107	1.20289	3.15823	2.23276	2.55336	3.14381	2.48092	3.2468
Fgf13	4.47417	5.15496	5.55795	5.26097	5.53473	5.91354	1.46517	1.26965	0.98333	1.26923	2.56205	3.15804	3.74248	3.68491	2.96827	3.24121
Morn4	4.91947	4.37728	5.48284	5.69332	5.66907	5.75415	1.97705	1.75096	2.0905	1.37344	1.5774	0.98333	1.45763	1.14641	1.22501	1.25114
Sec61a2	4.62824	4.60237	5.90748	6.00955	5.5323	5.19886	2.9739	3.09995	2.32758	3.0207	3.22192	2.96334	3.294	2.79612	2.99025	3.17248
Cpxm1	5.8351	5.44449	4.88971	4.93963	5.09715	5.66733	4.91643	2.27544	4.97992	4.35254	1.84346	1.83731	2.23053	2.19524	2.13116	2.4195
Igdcc4	4.89943	4.9932	5.5122	5.58243	5.81712	5.02296	1.46517	1.32067	1.97119	0.98333	1.9601	1.75942	1.9887	1.65994	1.80709	1.78386
Ccdc149	4.69952	4.8017	5.46794	5.49328	5.53595	5.82062	1.46517	2.39929	1.15741	2.1363	3.55432	3.82629	3.7129	3.81187	4.08406	3.80376
B3galnt1	5.30569	5.18024	5.26218	5.29654	5.17396	5.60001	1.24427	2.69836	1.87474	2.27192	2.68013	2.9806	2.8893	2.69432	3.26734	3.29609
Inpp5j	3.9777	4.65485	6.06037	5.97154	5.70726	5.44135	0.98333	1.04532	1.53938	1.15691	2.20038	2.58857	2.21654	2.19524	2.02155	1.72108
Ptges	6.21344	5.88539	4.49321	4.58432	5.17863	5.4539	5.23444	3.32905	4.90458	3.85507	1.18853	1.23429	1.16904	1.42591	1.24953	1.11125
Steap3	6.30008	5.97892	4.52811	4.46435	5.22149	5.31077	1.97705	2.75511	2.48832	1.86316	2.87099	3.26055	3.49852	3.25525	3.60319	3.22998
Smoc2	6.51784	5.84982	4.36071	4.43274	5.11024	5.53177	3.55782	2.39929	3.69646	3.83331	3.72887	3.27462	4.06472	4.21252	3.37153	3.3333
Grm1	3.75043	4.43243	5.86602	5.90397	5.90425	5.94145	0.98333	1.04532	2.0905	1.29069	2.91018	2.42161	2.33777	2.19524	2.55163	2.0108
Lrp3	5.50121	5.05307	5.28106	5.12909	5.49786	5.31077	2.11398	2.71753	1.58073	1.20289	2.83071	2.9806	3.07124	3.14381	3.99624	3.24121
Phactr3	4.42595	4.75919	5.54239	5.7066	5.85649	5.47869	0.98333	1.26965	0.98333	1.18008	1.05502	0.98333	1.16904	1.42591	1.22501	1.00984
Samd14	4.30927	4.6445	5.64401	5.69997	5.86906	5.59322	3.60505	2.42284	3.08488	3.00131	1.52787	2.01542	2.21654	2.0379	1.79047	1.81426
Rtl6	4.95874	4.80635	5.46494	5.29654	5.45104	5.7703	2.74	2.9781	1.87474	3.0207	2.85099	2.63293	2.62921	2.46626	2.68343	2.45851
Dagla	4.43989	4.84299	5.65194	5.66638	5.71049	5.41333	2.11398	2.35102	2.35167	1.9734	2.23165	2.69701	2.40096	2.98041	2.20822	2.74552
Egfr	5.95888	5.5563	4.89641	4.59864	5.31491	5.38345	3.50898	2.80971	3.08488	2.92791	1.36815	1.39746	1.61515	1.65994	1.65021	1.67213
Notum	5.932	5.83853	4.9075	4.82253	5.0706	5.1348	2.11398	1.63479	1.21107	2.15981	1.05502	1.29075	1.10976	0.98333	1.04064	1.08656
Slc16a12	6.5358	5.83625	4.75869	4.90549	4.72619	4.91268	2.11398	1.85847	2.39867	1.69637	2.35039	2.01542	2.7699	2.74612	2.48092	2.72966
Kcnc2	4.41892	4.8565	5.6493	5.36514	5.73499	5.62687	1.6567	1.63479	2.94937	1.52595	2.78926	2.63293	2.33777	2.46626	2.65618	3.20152
Strip2	5.29805	5.81335	5.36873	5.44655	5.14881	4.55533	0.98333	1.36996	0.98333	1.03509	3.25274	3.2175	3.44555	3.42376	3.23087	3.41491
Pde10a	4.40478	5.26032	5.91189	5.72629	5.429	4.88513	1.24427	1.5518	0.98333	1.29069	3.86475	3.86399	3.74248	3.48602	3.64998	3.85584
Plcxd2	4.53389	5.00537	5.48876	5.67316	5.49536	5.38608	2.46068	1.5518	2.98061	1.94662	1.18853	1.34509	1.33356	1.42591	1.53527	1.62146
Epop	4.23124	4.15486	5.56077	5.50092	6.01279	6.11829	2.46068	2.65925	2.83441	2.89327	1.42338	1.63409	1.75715	1.86126	1.47417	1.53284
Padi2	2.86793	4.07239	6.73021	6.77671	6.15143	4.96975	2.65276	1.63479	2.88481	1.61367	1.12332	1.05028	1.07917	0.98333	1.01227	1.08656
Slc4a8	3.95846	4.37728	5.91079	5.90397	5.73499	5.68234	2.65276	2.65925	1.93975	2.31443	1.5774	1.44799	1.48121	1.86126	1.22501	1.35817
C1qb	4.09689	4.38351	5.60503	5.69997	5.81911	5.94679	4.32248	2.75511	4.43758	4.0247	3.17442	2.92817	3.56072	3.73704	3.04029	3.07543
Ppfia2	4.06126	4.78767	5.78656	5.94377	5.4172	5.53295	0.98333	0.98333	2.0905	1.20289	0.98333	1.17552	1.07917	0.98333	1.17469	1.22875
Cacna2d2	4.46055	4.43243	5.68325	5.618	5.60578	5.72129	0.98333	1.16184	1.40771	0.98333	1.25093	1.29075	1.30741	1.29292	1.29734	1.49581
Ece2	5.07498	4.67022	5.52953	5.47787	5.56238	5.20184	1.97705	2.53512	1.69812	2.78406	3.87469	3.54219	3.56072	3.3587	3.10889	2.7997
Prmt8	4.52738	4.6445	5.59684	5.35674	5.74237	5.63682	4.81962	2.49125	5.14064	4.07811	0.98333	0.98333	0.98333	0.98333	0.98333	0.98333
L1cam	3.9291	4.42036	5.79614	5.82092	5.74552	5.77732	3.65079	3.09995	4.11761	3.48348	3.23741	3.28855	3.30725	3.10466	3.13544	3.49215
Oscp1	4.46738	4.46218	5.62935	5.66638	5.40397	5.82739	3.2952	2.02156	5.16123	4.51856	2.35039	1.91121	2.38854	2.19524	2.33963	2.13641
Dse	6.44539	5.7783	4.51657	4.43274	4.92448	5.35428	4.04264	3.82943	3.46209	3.94238	2.53723	2.56587	3.10199	2.9365	3.10889	3.21297
Acot11	4.89438	4.4444	5.518	5.65272	5.8594	5.06776	3.73814	2.80971	3.43979	3.21274	3.61488	3.51874	3.68778	3.45523	3.6361	3.52008
9330159F19Rik	4.49435	4.86543	5.59409	5.77123	5.51272	5.19587	1.82575	1.46374	0.98333	1.77458	1.18853	0.98333	1.01599	0.98333	1.09577	1.25114
Calhm5	6.18268	5.76404	4.49909	4.40041	4.84057	5.74192	0.98333	2.53512	1.69812	1.64732	1.92226	2.01542	2.38854	2.33711	2.30496	2.52434
Cux2	4.23124	4.61302	5.58307	5.63199	5.586	5.77632	2.35411	1.5518	1.80666	2.23919	1.76011	2.08093	2.15922	2.19524	1.9183	1.85869
Tmc7	5.84299	5.62892	5.07816	5.04794	5.10371	4.69937	0.98333	4.14469	2.57272	2.41554	2.26227	2.08093	1.92133	1.95228	2.13116	1.88756
Ypel4	4.67615	4.56447	5.90638	5.79629	5.48786	4.96274	1.82575	0.98333	1.80666	1.37344	1.05502	0.98333	1.04793	1.14641	1.06847	1.00984
Chl1	4.14875	4.81098	5.68067	5.76489	5.36218	5.59775	0.98333	1.04532	0.98333	1.00944	1.05502	1.17552	1.22599	1.29292	1.09577	1.06143
Dcaf12l1	5.16587	5.00133	5.22721	5.21524	5.13447	5.55176	0.98333	1.21675	0.98333	1.84877	1.36815	1.87474	1.83243	2.0379	1.8558	1.60416
Garnl3	4.33933	4.9179	5.82567	5.75214	5.54922	4.90539	2.35411	2.63929	3.49491	2.30392	2.26227	2.14359	2.17376	2.19524	2.19566	2.14839
Egr3	4.94414	5.47107	5.30306	5.14869	5.11674	5.29131	1.46517	2.51335	1.8411	1.93304	1.8834	2.47131	2.51959	2.11871	1.90293	3.07543
Praf2	4.48766	4.49709	5.22189	5.43063	5.66019	5.9732	1.97705	3.64153	2.2007	2.30392	3.673	3.73766	3.57723	3.85968	3.64537	3.77314
Islr2	4.86367	4.74474	5.36229	5.40642	5.50778	5.37159	1.24427	1.46374	0.98333	1.33266	3.00374	2.92817	2.27168	2.19524	3.10889	2.3692
Fam84a	4.75076	5.05698	5.28617	5.21524	5.30355	5.63461	1.6567	1.92594	2.8682	2.31443	1.84346	1.49681	2.0842	1.65994	1.45322	1.65543
Gdf10	5.10592	4.82936	5.18773	4.83468	5.39196	5.84941	3.8205	1.95852	3.01117	3.35699	2.06801	1.58976	2.32479	2.79612	2.14429	1.98431
Rasd1	5.90963	5.4534	4.63071	4.64076	4.93003	5.62132	0.98333	2.57769	1.58073	1.37344	4.06035	2.79786	3.18332	3.02303	3.40465	3.83375
NA	3.93895	4.35842	5.88858	6.04657	5.88533	5.04138	2.23904	1.99039	1.97119	1.13335	1.76011	1.79889	1.90398	2.19524	1.9782	1.85869
Fat2	4.39049	4.64968	5.74142	5.73927	5.40795	5.22106	1.6567	1.21675	1.62093	1.18008	0.98333	0.98333	0.98333	0.98333	0.98333	1.00984
Fxyd7	3.68168	3.83834	5.75253	5.8148	6.04297	6.01362	1.6567	1.21675	0.98333	1.31182	0.98333	1.11426	1.07917	1.29292	1.09577	1.06143
Carmil2	4.06126	4.0093	5.68454	5.618	6.06162	5.65215	3.60505	1.36996	1.58073	2.1363	1.36815	1.29075	1.25364	1.14641	1.34362	1.206
Abhd3	4.54683	4.70049	5.38786	5.49328	5.80409	5.13792	0.98333	1.5518	1.66004	1.22535	2.03293	2.1126	1.63631	1.76411	1.9928	1.68863
Lgi1	3.93895	3.99309	5.85001	5.80249	5.85358	5.62576	0.98333	0.98333	0.98333	1.22535	1.05502	1.44799	1.1397	0.98333	1.17469	1.22875
AI464131	4.94902	4.34571	5.12451	5.3398	5.95229	5.33405	1.6567	2.02156	1.80666	2.33523	1.8834	2.1126	2.25809	2.11871	2.10453	1.97088
Drp2	4.37606	4.67531	5.64268	5.67991	5.59767	5.06613	0.98333	1.32067	1.53938	0.98333	1.05502	0.98333	1.40927	1.42591	1.14886	1.06143
Gpt2	5.05247	4.76875	5.31477	5.04794	5.95682	4.89622	3.55782	2.82746	2.39867	2.58139	2.74659	2.91026	3.26031	2.79612	2.74507	2.72166
Sfrp1	6.90217	6.09171	3.79022	3.72491	5.18792	5.33812	3.11112	4.26681	3.88982	2.17142	2.1684	2.3961	3.14692	3.10466	2.66532	2.72166
P2ry1	6.22959	5.82256	4.49909	4.66817	4.69612	5.00431	2.23904	1.63479	2.0905	2.29333	3.00374	3.55377	3.53841	3.71121	3.14853	3.3899
Emc9	4.38329	4.28707	5.42999	5.49328	5.56476	5.71505	2.9739	3.63146	2.69073	2.33523	3.10855	3.51874	3.60969	3.51617	3.38266	2.9781
P4htm	4.30927	4.50854	5.57057	5.65272	5.369	5.44764	1.6567	2.53512	1.69812	1.24746	2.56205	2.94586	3.31383	3.10466	2.87681	2.92337
Nlgn3	3.91918	4.30688	5.74266	5.69997	5.68884	5.48482	0.98333	1.16184	0.98333	0.98333	0.98333	0.98333	1.10976	1.14641	1.14886	1.00984
Ano3	3.96811	4.58084	5.73396	5.63894	5.34844	5.55992	0.98333	0.98333	1.62093	0.98333	1.05502	0.98333	1.04793	1.42591	0.98333	1.11125
Fn3k	4.55326	4.12541	5.52665	5.44655	5.5965	5.58068	1.6567	1.85847	2.30308	2.36587	2.32161	2.77825	2.86261	2.6406	2.60009	2.35892
Igsf9b	4.65239	4.93073	5.70502	5.56065	5.32336	4.64785	2.65276	1.50844	1.90761	1.50774	3.51672	3.78757	3.51575	3.48602	3.48943	3.52927
Plppr3	3.85819	4.38972	5.74513	5.53854	5.48786	5.78925	2.11398	1.46374	2.11885	2.59869	1.12332	0.98333	0.98333	1.14641	1.04064	1.08656
Ephb6	4.46738	4.46806	5.68067	5.7328	5.16144	5.25446	0.98333	1.26965	1.77138	1.57922	1.12332	1.23429	1.28078	1.14641	1.14886	1.39886
Kcnmb4	4.10567	4.36473	5.68969	5.30529	5.61728	5.67378	1.6567	1.85847	1.73521	1.41311	1.31073	1.34509	1.67773	1.65994	1.65021	1.45781
Nos1	4.80563	5.26032	5.02212	5.20592	5.29068	5.16566	0.98333	0.98333	0.98333	0.98333	1.12332	0.98333	1.04793	0.98333	1.04064	1.03587
Osbp2	4.03394	4.73989	5.57753	5.62501	5.45873	5.30939	0.98333	1.04532	0.98333	0.98333	1.67165	1.49681	1.97215	1.95228	1.80709	1.8732
Il18	5.35435	4.76875	5.09959	5.23371	4.98436	5.30246	2.55992	1.36996	1.10169	2.17142	0.98333	1.05028	1.07917	0.98333	1.04064	1.13553
B630019K06Rik	4.35413	4.45035	5.46344	5.37349	5.51887	5.57379	1.97705	2.35102	3.01117	3.03983	2.68013	2.91026	2.8893	2.58479	2.853	3.09413
Mrvi1	5.5883	5.15131	5.18409	5.12909	4.89074	4.75319	1.82575	1.41761	2.46642	2.18294	2.23165	2.37013	2.70127	2.26792	2.41742	2.26301
Tmem240	4.01543	4.17656	5.60503	5.71976	5.6479	5.51988	3.17513	1.7877	3.29823	2.64939	1.47657	1.49681	1.48121	2.0379	1.57461	1.35817
Satb1	4.72821	5.05307	5.28106	5.1192	5.37444	5.11438	4.77901	3.025	3.95416	3.59114	2.40629	2.51937	2.77945	2.46626	2.50148	2.80727
Enpp1	5.9021	5.3929	4.74144	4.81028	4.54284	5.25446	3.69513	1.75096	2.61314	2.63269	1.8834	1.94679	2.43758	2.26792	1.80709	2.04964
B4galnt1	4.48093	4.63409	5.41453	5.26994	5.48032	5.35562	4.83951	3.72913	4.14544	3.2295	1.99697	2.58857	2.42548	2.52674	1.83975	2.56959
Lrtm2	4.39049	4.51423	5.30977	5.39826	5.60462	5.38869	3.55782	2.65925	3.38248	3.74671	1.05502	1.11426	1.04793	0.98333	1.06847	1.11125
Epb41l4b	4.89943	4.95604	5.23074	5.26994	5.44975	4.743	3.77991	3.73854	3.79637	3.7583	1.5774	1.83731	1.65717	1.65994	1.47417	1.58666
Lrrc4c	4.02472	4.54792	5.56217	5.58961	5.18946	5.58411	0.98333	1.32067	1.04372	1.26923	0.98333	1.05028	1.07917	0.98333	1.01227	1.03587
Rtkn	4.26296	4.55898	5.49319	5.49328	5.22299	5.43122	3.2952	3.59047	3.89802	3.63792	3.09161	2.61092	3.30725	3.57463	2.80419	3.04371
Omd	6.32471	5.32975	4.17497	4.29884	4.89831	5.42995	0.98333	1.10476	0.98333	0.98333	1.05502	1.17552	1.22599	1.29292	1.14886	1.13553
Dzip3	5.13192	5.10303	5.43919	5.35674	4.99499	4.40567	1.46517	2.08197	1.49681	2.27192	3.59096	3.51874	2.99956	2.52674	3.28524	3.18997
Cnksr2	4.46055	4.84751	5.37033	5.33125	5.22149	5.18988	1.46517	1.10476	0.98333	0.98333	0.98333	0.98333	0.98333	0.98333	1.01227	0.98333
Ssbp2	5.19905	4.89191	4.98701	5.0163	5.24541	5.04802	1.82575	3.30391	2.85141	2.94154	2.61045	2.2613	2.96652	2.58479	2.5809	2.67273
Bex1	3.87881	4.5199	5.46494	5.51609	5.19715	5.80502	2.11398	0.98333	1.361	1.50774	1.05502	1.11426	1.16904	1.54767	1.24953	1.08656
Slc7a8	4.14875	4.37102	5.36229	5.39005	5.4277	5.66948	3.23641	1.46374	3.83106	2.5372	1.25093	1.29075	1.57187	1.65994	1.12256	1.37866
Mpv17l	4.26296	4.21201	5.55373	5.35674	5.70078	5.2559	3.8205	2.53512	4.0382	3.17862	1.47657	1.39746	1.65717	1.65994	1.65021	2.13641
Grik2	3.84777	4.03328	6.07224	6.17633	5.72864	4.47383	1.24427	1.7877	2.35167	1.56168	1.31073	1.44799	1.33356	1.42591	1.93351	1.76842
Dio2	3.80531	4.21201	5.26564	5.33125	6.19355	5.51748	2.55992	1.26965	2.0905	1.35319	1.36815	1.58976	1.33356	1.42591	1.9183	1.49581
Jakmip1	4.03394	4.36473	5.37832	5.3398	5.46511	5.7337	2.74	1.50844	2.53113	1.9866	0.98333	0.98333	1.07917	0.98333	0.98333	1.00984
Ankrd13d	4.33933	4.47391	5.48136	5.4856	5.44975	5.07915	3.35169	1.7877	3.5992	3.07116	2.32161	2.14359	1.9554	1.42591	1.88739	1.95732
Tceal5	4.23124	4.54236	5.25004	5.26097	5.23798	5.76729	0.98333	0.98333	1.40771	1.08506	1.47657	1.39746	1.71799	1.42591	1.45322	1.25114
Mast1	3.78361	4.50283	5.64533	5.33125	5.57188	5.4159	0.98333	0.98333	1.53938	1.10941	0.98333	1.17552	1.01599	1.14641	1.14886	1.06143
Atp8a2	3.9777	4.58625	5.38627	5.49328	5.43941	5.36363	2.65276	1.10476	1.45295	1.6306	1.8834	1.94679	2.21654	2.52674	2.00725	2.08747
Faah	3.86853	4.28041	5.49171	5.52361	5.6921	5.38739	4.10969	3.00954	3.98529	3.24607	0.98333	1.29075	1.01599	0.98333	1.04064	1.11125
Rpusd1	4.85849	4.98502	5.13398	4.96196	5.18328	5.10963	2.46068	2.96212	1.31274	2.5372	3.63841	3.69645	3.5496	3.21905	3.69976	3.37977
Slc25a18	4.09689	4.30688	5.47987	5.67316	5.64115	5.02465	1.6567	1.36996	1.361	1.03509	0.98333	0.98333	0.98333	0.98333	1.04064	0.98333
Stac2	4.23124	4.54236	5.43613	5.14869	5.4778	5.38476	1.6567	1.21675	2.35167	1.29069	1.05502	1.17552	1.01599	1.29292	1.09577	1.1594
Elovl4	4.27856	4.69047	5.28957	4.81028	5.41983	5.72855	1.6567	1.82352	2.14665	1.20289	0.98333	0.98333	1.01599	0.98333	1.01227	1.00984
Rprm	3.42554	4.31994	5.37033	5.56794	5.63097	5.87391	2.90007	2.05208	3.39413	3.41675	0.98333	0.98333	1.07917	0.98333	1.06847	0.98333
Slc1a4	3.9291	4.42641	5.44985	5.45444	5.5766	5.34487	3.77991	3.04031	3.79637	3.46	2.37861	2.17393	2.59719	2.74612	1.77367	2.31708
Ak5	4.14023	4.55346	5.32142	5.22451	5.30782	5.6313	1.82575	1.04532	0.98333	0.98333	1.12332	1.11426	1.1978	1.14641	1.12256	1.206
Tmem14a	4.96839	4.55898	4.94673	4.92834	5.24096	5.53295	3.55782	3.58003	1.40771	3.59546	2.63405	2.75836	2.817	2.98041	2.6924	2.51512
Larp6	4.72821	4.26023	5.08012	5.21524	5.32477	5.56456	1.46517	1.36996	2.03208	2.79911	1.05502	1.29075	1.43365	1.54767	1.34362	1.47693
Slc6a7	3.85819	3.97669	5.65194	5.5752	5.60578	5.50427	0.98333	0.98333	0.98333	0.98333	0.98333	1.05028	0.98333	0.98333	0.98333	1.00984
Pex5l	4.23923	4.94344	5.26045	5.35674	5.16458	5.19587	0.98333	1.04532	0.98333	1.13335	1.05502	0.98333	1.07917	0.98333	1.04064	1.11125
Ankrd45	3.81605	4.20499	5.68067	5.62501	5.64453	5.17782	1.24427	1.5518	1.87474	1.35319	1.25093	1.29075	1.25364	1.14641	1.17469	1.31631
Wwox	4.46738	4.47974	4.89195	5.12909	5.37036	5.80306	1.82575	2.11124	2.00195	2.03825	2.70262	2.75836	2.94124	3.02303	2.79589	2.72166
Sox9	4.57237	4.22595	5.2448	5.30529	5.84968	4.92175	0.98333	1.5518	2.22699	2.57266	0.98333	1.23429	1.43365	1.29292	1.27363	1.29491
Dtnb	4.57237	4.46806	5.28447	5.19654	5.41983	5.17782	3.97233	2.59852	4.09639	3.69535	2.68013	2.99767	2.93271	2.74612	3.06121	2.88808
Klhdc7a	5.61619	4.88314	4.70377	4.70833	5.31632	4.88513	2.11398	2.61905	2.30308	2.48232	1.42338	1.17552	1.33356	0.98333	1.41038	1.29491
Sel1l3	3.9291	4.23287	5.60231	5.51609	5.50902	5.32314	2.46068	1.32067	1.04372	1.45171	1.12332	1.05028	1.30741	0.98333	1.12256	1.22875
Dclk2	3.9291	4.38972	5.53239	5.65272	5.5201	5.07428	2.11398	2.13994	1.80666	2.32487	2.91018	2.51937	2.42548	1.95228	2.5809	2.81481
Pnck	4.03394	4.63409	5.30642	5.35674	5.442	5.32314	0.98333	1.21675	1.04372	1.47063	1.47657	1.75942	1.52725	1.42591	1.55508	1.18289
Asic1	3.64604	4.08008	5.53383	5.53109	5.65462	5.59435	0.98333	0.98333	0.98333	1.18008	1.36815	1.05028	1.16904	0.98333	1.12256	1.03587
N4bp2l1	4.60368	4.19084	5.34445	5.25194	5.54922	5.0694	4.17376	3.45999	4.28332	4.68981	2.03293	1.91121	2.05306	1.76411	1.8558	2.09986
Atl1	4.61601	5.21211	5.05441	4.91696	5.27913	4.91631	0.98333	2.51335	0.98333	1.00944	3.57885	3.65404	3.46342	3.68491	3.23087	3.49215
Itgb8	4.79482	4.90929	5.46944	5.47787	5.26164	4.076	2.11398	1.26965	0.98333	0.98333	1.52787	1.11426	1.30741	1.29292	1.29734	1.47693
St6galnac5	4.33933	3.99309	5.43919	5.28773	5.52865	5.40042	0.98333	1.41761	0.98333	1.54392	0.98333	0.98333	0.98333	1.14641	0.98333	0.98333
Peg10	4.52083	5.09925	4.80686	4.93963	5.49786	5.11596	2.23904	3.05545	0.98333	1.03509	1.9601	2.42161	2.46149	2.58479	2.50148	2.76899
Ss18l1	3.98723	4.20499	5.48433	5.55332	5.45104	5.2969	3.40605	2.39929	3.75181	3.53382	2.48627	1.98151	2.23053	2.58479	2.24527	2.26301
Tecpr2	4.50765	4.64968	5.33955	5.3398	5.13447	4.99917	1.82575	2.77354	2.35167	1.61367	3.93294	3.51874	3.32039	2.9365	3.64537	3.97834
Megf10	4.40478	4.37728	5.41764	5.43861	5.62528	4.69303	0.98333	1.04532	0.98333	0.98333	1.05502	0.98333	1.04793	1.14641	1.01227	1.13553
Whrn	4.34675	4.40205	5.25872	5.30529	5.36081	5.26448	1.24427	1.46374	1.69812	1.4893	2.58645	2.87376	2.70127	2.46626	2.71017	2.14839
Pde8b	4.31684	4.25344	5.54523	5.40642	5.41983	4.98713	3.8205	4.2862	3.5992	5.109	1.42338	1.63409	1.38447	1.14641	1.49483	1.35817
Bmp5	6.32283	5.76165	4.2845	3.9868	4.36039	5.19737	3.11112	3.26536	4.00061	3.7311	1.05502	1.23429	1.10976	1.54767	1.14886	1.1594
Mob3b	5.55665	5.47691	4.58447	4.90549	4.50121	4.88328	3.77991	3.83821	4.35061	3.75445	2.35039	2.31674	2.62921	2.79612	2.61903	2.51512
Hr	4.55966	4.70049	5.14152	5.12909	5.24096	5.1128	4.2351	2.69836	2.85141	4.08119	2.81013	2.77825	2.38854	2.19524	1.94856	2.14839
Dpy19l3	4.31684	4.60771	5.11689	5.21524	5.38255	5.21074	3.73814	3.11448	3.27322	3.94914	2.32161	2.99767	3.19763	3.10466	2.89246	3.05011
Gpc3	6.50297	5.92011	3.96598	4.26334	4.2494	4.94328	3.45843	3.80276	3.04111	3.08963	1.47657	1.54404	2.02124	2.46626	1.77367	2.06236
Dusp14	3.7945	4.60771	5.28787	5.07891	5.38659	5.66948	4.75826	2.89636	4.0603	4.03745	1.18853	1.54404	1.30741	1.29292	1.09577	1.1594
Pla2g4a	5.90462	5.88539	4.32476	4.38397	4.54765	4.77136	2.82225	3.22575	1.04372	2.33523	3.26791	3.27462	3.92553	3.65812	3.72183	3.62669
Fgf9	3.6095	3.99309	5.49466	5.4856	5.60924	5.6202	0.98333	1.04532	2.67172	2.10031	1.92226	1.94679	2.24438	1.65994	1.79047	1.56894
Tspyl5	4.08807	4.41428	5.20581	5.19654	5.26895	5.63351	1.82575	1.41761	1.73521	1.71236	1.71655	1.58976	1.9887	1.76411	1.77367	1.84403
Col25a1	5.12331	4.47391	4.92507	5.02692	4.79873	5.41718	0.98333	1.36996	1.45295	1.52595	1.67165	1.87474	2.09951	2.26792	2.61903	2.82231
Atat1	4.09689	4.30688	5.25352	5.29654	5.32477	5.48604	2.82225	2.89636	2.85141	2.96841	2.68013	3.24634	2.817	2.40313	2.65618	2.63917
Mpp3	4.03394	4.48555	5.31477	5.3398	5.50283	5.07753	1.97705	3.23907	3.65834	3.16126	3.09161	2.42161	2.53094	2.33711	2.78755	2.72166
Kcnj13	6.09067	5.41436	3.88303	4.0297	4.83072	5.46635	0.98333	1.50844	1.8411	1.71236	0.98333	0.98333	0.98333	0.98333	0.98333	0.98333
Gfra4	4.46055	4.37728	5.19499	5.06866	5.3785	5.22253	1.6567	1.46374	0.98333	0.98333	1.5774	1.63409	1.52725	2.26792	1.45322	1.65543
Cemip	5.66746	5.59172	4.63338	4.51052	4.63855	4.63025	3.2952	0.98333	0.98333	1.10941	1.05502	0.98333	1.04793	0.98333	0.98333	1.18289
Proser2	5.51774	5.35851	4.40206	4.58432	4.97545	4.80703	3.35169	2.80971	3.7244	3.7698	2.53723	2.01542	2.42548	2.33711	2.13116	2.19534
Sgms2	5.67926	6.19808	4.55092	4.84672	3.83801	4.52946	1.24427	1.67456	1.15741	1.29069	3.36983	2.44667	2.42548	2.79612	2.53178	2.82231
NA	4.35413	4.12541	5.64135	5.43063	5.29784	4.77337	0.98333	1.21675	1.21107	1.31182	1.62529	1.29075	1.1978	1.42591	1.27363	1.33739
Car13	6.93084	6.12184	3.36398	3.75079	4.08011	5.34487	1.6567	1.21675	1.2628	1.00944	1.9601	2.01542	2.25809	2.19524	1.82351	2.28488
Rab30	4.7619	4.74957	5.17494	5.1192	5.13126	4.62138	2.23904	2.67894	1.77138	1.66386	2.98551	2.71775	2.79834	3.3587	2.73643	3.05011
Kcnq5	4.31684	4.85201	5.20401	5.00559	4.90396	5.26732	1.46517	1.8926	1.10169	1.74381	1.31073	1.23429	1.10976	1.42591	0.98333	1.13553
B4galt2	4.25509	4.43243	5.18955	5.3398	5.36355	4.95393	3.60505	2.30107	3.70583	3.0271	2.20038	2.79786	3.37806	2.69432	2.68343	3.10031
Ppargc1a	4.31684	4.01734	5.37513	5.22451	5.44459	5.13792	2.35411	1.50844	2.83441	2.44454	3.63841	3.44602	3.48691	3.5457	3.3937	3.65215
Clec2l	4.09689	4.17656	5.20041	5.40642	5.3064	5.3286	0.98333	0.98333	2.0905	0.98333	1.05502	1.05028	0.98333	1.14641	1.04064	1.06143
Plch2	3.91918	4.6393	5.52953	5.36514	5.29355	4.76331	2.23904	1.04532	1.66004	1.54392	0.98333	0.98333	0.98333	0.98333	1.01227	0.98333
Fmn2	3.68168	4.08008	5.49024	5.42261	5.59184	5.24004	0.98333	1.16184	0.98333	1.35319	0.98333	0.98333	1.01599	0.98333	0.98333	1.03587
Dock7	5.01571	4.96438	5.1731	5.04794	5.05715	4.23285	2.35411	2.51335	0.98333	2.02551	2.78926	3.17313	2.77945	2.46626	2.77915	3.02434
Lin7b	3.29355	3.4679	5.58997	5.7066	5.74026	5.677	1.24427	0.98333	0.98333	1.52595	0.98333	0.98333	0.98333	0.98333	1.04064	1.03587
Rhobtb3	4.32438	4.219	5.49759	5.37349	5.40264	4.59441	2.11398	2.75511	1.53938	1.4893	2.65727	2.69701	3.51003	3.81187	3.01906	3.53384
Neto2	3.78361	3.95174	5.48284	5.65272	5.3429	5.18084	1.82575	2.446	2.91745	2.59869	2.65727	2.01542	2.41327	2.52674	1.9928	2.2957
Thrb	4.68203	4.49709	5.03026	4.96196	5.21089	5.00772	3.23641	2.13994	2.83441	2.84333	2.26227	2.31674	2.67083	2.74612	2.51165	2.51512
Gdf11	4.30927	4.35842	5.12451	4.96196	5.45617	5.17327	2.11398	1.59389	0.98333	2.02551	1.5774	1.67709	1.79529	2.33711	1.79047	1.67213
Lgi4	3.7392	4.04905	5.74266	5.68663	5.53473	4.62582	2.55992	1.36996	2.7463	2.26109	1.62529	1.54404	1.90398	1.76411	1.75667	1.73703
Col13a1	5.41561	5.14399	4.36071	4.49529	4.62949	5.32997	2.55992	2.37536	3.11334	2.5372	3.41139	3.51874	3.23279	3.10466	2.48092	3.27984
Frmd5	4.61601	4.66512	5.18226	5.37349	4.60195	4.91994	1.24427	1.46374	2.32758	1.18008	3.31247	3.45839	3.51003	3.42376	3.50479	3.20152
Ptpn13	5.61926	5.3004	4.41455	4.70833	4.61119	4.70148	3.60505	3.36595	3.18212	2.7916	1.52787	1.49681	1.35924	1.86126	1.47417	1.45781
Lurap1	4.91947	5.19803	4.79974	4.56986	4.97366	4.86271	2.46068	3.29117	1.80666	2.43494	2.92939	3.01453	2.98314	3.21905	3.18712	3.31215
Tceal1	5.13192	4.74474	4.79258	4.65453	4.65874	5.33133	0.98333	2.37536	1.40771	1.57922	3.61488	3.38248	3.66737	3.45523	3.43169	3.54295
Shroom1	4.92939	5.4534	4.74144	4.87052	4.55725	4.75116	1.46517	2.59852	2.11885	1.43254	1.84346	2.34368	2.35063	2.40313	2.31661	2.38953
Usp53	5.28266	6.01148	4.62803	4.68168	4.44807	4.23866	2.11398	2.65925	1.40771	2.95503	2.76809	2.99767	3.05562	3.76242	3.50987	3.90256
Sv2c	3.59711	4.14021	5.36873	5.3818	5.43161	5.36363	1.46517	1.10476	1.87474	0.98333	0.98333	1.05028	0.98333	0.98333	1.01227	0.98333
Ankrd6	4.48093	4.73502	5.02823	5.00559	5.02468	5.00601	3.69513	1.59389	3.09918	2.47297	1.9601	2.23276	2.88046	3.06442	2.24527	2.78442
Bcl11a	3.7945	4.23287	5.30809	5.27886	5.35395	5.29411	2.11398	1.21675	1.04372	2.2057	1.05502	1.23429	1.28078	0.98333	1.01227	1.06143
Eya1	6.01351	5.32652	4.26048	4.3335	4.58798	4.73684	1.46517	1.41761	1.49681	1.50774	1.62529	1.63409	1.88642	1.65994	2.61903	2.52434
Gpld1	4.11439	4.23287	5.25004	5.19654	5.4778	4.98194	2.35411	2.05208	1.77138	1.68021	1.99697	2.2613	1.93847	1.76411	2.00725	1.92982
Ache	3.13117	3.82923	5.54381	5.4856	5.81012	5.44638	1.24427	1.10476	0.98333	1.06029	1.25093	1.94679	2.20242	2.0379	1.57461	1.67213
Wfikkn2	6.2053	5.16223	4.08797	3.87362	4.54765	5.36629	0.98333	1.41761	0.98333	1.50774	1.67165	1.39746	1.81398	1.54767	1.55508	1.68863
Mtx3	4.47417	4.38351	5.37992	5.4701	5.09385	4.43383	3.23641	3.025	2.46642	3.20711	3.09161	3.08008	3.0158	3.29057	2.91562	2.96461
Arhgap39	3.90919	4.62359	5.18591	5.30529	5.39464	4.81484	3.55782	2.75511	2.9335	3.00131	2.06801	2.34368	2.0842	2.46626	2.19566	2.22957
Zfr2	4.30165	3.95174	5.42999	5.36514	5.14881	5.03304	1.97705	1.41761	3.09918	1.78973	1.42338	1.29075	1.43365	1.29292	1.14886	1.39886
Hcn1	3.39723	4.42641	5.47987	5.30529	5.34429	5.27584	1.46517	0.98333	1.40771	0.98333	1.18853	1.11426	1.25364	0.98333	1.14886	1.11125
Entpd6	4.67615	4.38972	4.97441	5.00559	5.14722	5.03471	3.89841	2.49125	3.92235	3.03348	3.1253	3.0312	3.17612	3.10466	2.77915	2.65605
Cobl	4.57237	4.6393	4.92942	4.93963	4.87357	5.21812	3.73814	2.9939	2.91745	3.45526	1.47657	1.58976	1.79529	1.54767	1.66851	1.65543
Osr1	6.08624	5.86772	3.55661	3.75079	4.84057	5.05628	3.89841	2.446	3.22187	3.26786	1.31073	1.67709	1.63631	1.65994	1.53527	1.78386
Clstn2	3.75043	4.08008	5.40986	5.29654	5.30924	5.30385	2.74	2.61905	3.24777	1.9055	1.25093	1.23429	1.1397	1.14641	1.14886	1.22875
Cacna1b	4.15721	4.47974	5.27594	5.56065	5.02985	4.6012	0.98333	1.32067	0.98333	0.98333	1.76011	1.75942	1.40927	1.86126	1.72205	1.73703
Col12a1	5.7141	5.70555	4.3148	4.17054	4.81081	4.37694	4.89758	4.40917	3.24777	3.86226	1.80239	1.58976	1.50442	1.14641	1.73946	1.85869
Kirrel3	3.21464	3.96842	5.49466	5.44655	5.40131	5.56687	1.6567	1.71327	1.69812	1.29069	2.20038	1.83731	1.83243	1.95228	3.01906	2.11214
Rtn4rl1	4.46055	4.45035	4.96807	4.88227	5.24541	5.07266	3.04414	3.08526	2.90122	3.39215	1.8834	1.87474	2.4733	2.52674	2.06364	2.14839
Fndc10	4.95389	4.49709	4.99327	4.90549	4.83861	4.88513	2.9739	2.77354	4.07484	3.78122	2.51198	2.14359	2.93271	3.18192	2.46006	2.59608
Frzb	4.94414	4.15486	4.98282	4.76021	4.68523	5.53414	0.98333	1.46374	0.98333	1.06029	2.06801	1.63409	2.23053	1.86126	1.49483	1.63855
Kl	5.60076	5.4534	4.12644	4.18958	4.47867	5.15031	0.98333	1.59389	0.98333	1.52595	1.12332	1.34509	1.43365	0.98333	1.22501	1.56894
Xrcc5	4.74515	4.21201	4.90529	4.87052	5.07228	5.14102	2.82225	2.82746	3.42851	3.05244	2.58645	2.63293	3.16887	3.603	2.55163	2.80727
Tram1l1	3.41145	3.63394	5.40361	5.50092	5.23649	5.75618	1.46517	3.58003	2.94937	2.49161	1.18853	1.05028	1.45763	1.14641	1.12256	1.37866
Megf11	4.24719	4.02533	5.08988	5.33125	5.06557	5.18235	1.24427	1.10476	1.21107	1.03509	1.05502	1.05028	1.07917	0.98333	0.98333	1.08656
Cpne5	3.53351	4.21201	5.46043	5.3398	5.26749	5.12227	1.46517	1.32067	3.04111	3.21274	0.98333	1.05028	0.98333	0.98333	1.09577	1.00984
Clvs1	3.87881	4.48555	5.19318	5.08909	5.04697	5.24004	0.98333	0.98333	1.10169	0.98333	1.05502	1.34509	1.07917	1.29292	1.22501	1.18289
Bhlhe22	4.13167	4.53117	4.83501	4.99481	5.11674	5.28148	1.6567	1.32067	1.49681	1.20289	1.25093	1.44799	1.28078	1.29292	1.12256	1.43842
Sh3gl3	4.80563	4.30031	4.82802	4.81028	5.00904	5.13636	3.60505	2.87944	2.57272	2.49161	1.67165	1.71884	2.4733	2.58479	1.9782	2.0108
Cd83	4.18231	4.68544	4.88523	5.03747	4.80277	5.25015	3.73814	2.22275	2.2528	2.57266	2.74659	2.71775	2.84454	3.21905	2.13116	2.88808
Scai	4.47417	4.47391	5.49171	5.21524	5.05715	4.1302	2.11398	2.30107	2.48832	2.5372	3.47812	2.83631	3.294	3.3587	3.11557	3.2468
Shc2	4.66432	4.49709	5.10922	4.98394	4.86588	4.70358	1.82575	1.21675	2.06159	2.2057	1.80239	1.91121	2.15922	1.54767	1.94856	2.26301
Syt3	3.7392	3.86531	5.26391	5.23371	5.43422	5.27866	1.46517	1.32067	1.80666	1.22535	1.18853	0.98333	1.30741	1.14641	1.06847	1.11125
Ankrd34a	3.6699	4.11796	5.06237	5.08909	5.37985	5.49093	0.98333	1.26965	0.98333	0.98333	1.31073	1.67709	1.45763	1.29292	1.55508	1.51445
Abca9	6.0594	5.71793	3.97866	4.15124	4.0085	4.87209	0.98333	2.02156	2.17393	1.43254	2.23165	2.20365	2.35063	2.40313	2.24527	2.55166
Wscd2	3.84777	4.16936	5.15647	5.00559	5.13607	5.4514	1.24427	1.16184	2.03208	1.75928	1.12332	0.98333	1.01599	0.98333	0.98333	1.03587
Abcg4	3.81605	3.99309	5.20401	5.4701	5.10861	5.14568	0.98333	0.98333	0.98333	0.98333	1.05502	0.98333	1.04793	1.14641	1.01227	0.98333
Sox8	3.7945	4.0093	5.21298	5.14869	5.46001	5.05628	0.98333	2.59852	1.73521	1.50774	0.98333	0.98333	1.04793	0.98333	1.09577	1.03587
Slc7a4	3.98723	3.83834	5.12831	5.43063	5.0264	5.26305	3.77991	1.7877	3.31057	3.0207	1.18853	1.23429	1.54974	1.14641	1.20007	1.31631
Fat3	3.7392	4.28041	5.40361	5.4856	5.11186	4.63688	2.35411	1.99039	1.97119	2.42527	1.05502	1.05028	1.01599	0.98333	1.04064	1.206
NA	4.2232	3.93486	4.94242	5.30529	4.96107	5.26732	0.98333	1.71327	1.04372	1.64732	3.07446	3.232	3.52145	3.25525	3.11557	3.0047
B3galt1	3.93895	4.01734	5.20401	5.26994	5.18018	5.0179	1.6567	1.26965	0.98333	0.98333	1.05502	1.17552	1.35924	0.98333	1.17469	1.39886
Rgs7	3.98723	4.50854	5.05839	4.84672	5.03844	5.17023	0.98333	1.04532	0.98333	0.98333	0.98333	1.23429	1.10976	1.42591	1.01227	1.25114
Amy1	4.80023	4.54792	4.88523	5.03747	4.67204	4.6609	2.82225	2.08197	0.98333	1.13335	2.13571	3.04768	2.37601	2.19524	2.0774	2.12433
Elavl2	4.06126	4.28041	4.95102	5.18709	5.19562	4.9145	0.98333	1.10476	1.69812	1.35319	0.98333	0.98333	0.98333	0.98333	1.04064	1.06143
Ankrd13b	4.07918	4.47974	5.16388	5.34829	4.97902	4.53183	2.55992	3.11448	2.03208	2.08811	2.92939	3.12736	2.60794	2.74612	3.17437	2.93725
Gprc5c	5.64356	4.98912	4.51947	4.40041	4.54525	4.43889	1.97705	2.16808	2.81722	2.74574	2.43345	2.17393	2.72122	2.74612	2.351	2.45851
Itih3	3.02417	3.89179	5.62532	5.50852	5.46384	5.01959	1.6567	1.41761	2.03208	1.03509	1.36815	1.63409	1.54974	1.54767	1.49483	1.31631
Tmem150c	3.71646	3.85637	5.09571	5.26097	5.26017	5.34217	2.23904	1.63479	2.94937	1.94662	1.84346	1.75942	1.698	1.65994	2.14429	1.8732
Fam69b	4.00609	4.00121	5.09959	5.10923	5.21393	5.10167	1.24427	1.50844	1.69812	1.57922	2.20038	2.04854	2.36338	2.40313	2.11791	1.92982
Dennd6b	3.62178	4.06465	5.93916	6.04134	5.12159	3.73695	3.40605	2.05208	2.37536	2.1363	2.61045	2.49554	2.0842	2.0379	1.9928	2.06236
Mpped2	5.54057	5.02544	4.46646	4.07137	4.63403	4.743	3.04414	3.65153	3.04111	3.13778	2.68013	3.06397	2.8893	2.79612	2.60009	2.56959
Zfhx2	4.21511	4.31994	5.11689	4.72148	5.13607	4.89989	2.35411	3.2123	3.01117	3.98577	2.68013	2.42161	2.49663	2.6406	2.89246	2.82976
Sec14l2	3.53351	4.36473	5.10922	4.93963	5.2335	5.21665	2.82225	3.025	2.72801	2.78406	3.4911	2.96334	2.95814	2.58479	3.18076	2.67273
Galnt17	3.77263	4.24662	5.03634	4.87052	5.37036	5.10007	1.6567	1.16184	2.06159	1.35319	1.47657	1.34509	1.52725	1.42591	1.59389	1.37866
Necab3	3.41145	3.79223	5.16018	5.25194	5.442	5.30107	0.98333	1.16184	1.04372	0.98333	1.92226	2.28929	2.17376	1.29292	1.79047	1.95732
Zfp612	4.50102	4.34571	4.89195	4.70833	5.06389	4.80507	1.24427	1.63479	1.04372	1.15691	2.56205	1.63409	2.48501	1.65994	1.9183	1.97088
Kcnn2	3.58461	3.70534	5.34934	5.45444	5.4172	4.78136	0.98333	0.98333	0.98333	0.98333	1.71655	1.83731	1.9554	1.65994	1.57461	1.65543
Pak6	3.69337	4.28041	4.94026	5.22451	5.10534	4.96274	1.97705	1.59389	2.35167	1.68021	1.71655	1.91121	2.23053	1.86126	1.65021	1.75281
Nkain4	4.86884	4.69047	4.57059	4.54049	5.01427	4.51994	3.17513	2.32626	2.79981	3.62109	1.5774	1.71884	1.93847	1.76411	1.80709	2.04964
Baiap3	4.43293	4.61302	4.88299	4.76021	4.69395	4.79129	1.46517	1.32067	1.62093	1.35319	1.05502	1.34509	1.1397	0.98333	1.17469	1.11125
Lss	4.48093	4.28707	4.98701	5.03747	4.87357	4.50312	3.40605	2.94596	2.22699	1.94662	1.9601	1.91121	2.21654	2.11871	2.0774	1.99761
Lama1	5.369	5.04523	4.37994	4.11186	4.49123	4.76331	2.55992	2.32626	2.81722	1.43254	1.05502	0.98333	1.01599	0.98333	0.98333	1.00984
A2m	4.68788	4.71539	4.60914	4.54049	4.66319	4.92536	0.98333	0.98333	0.98333	1.41311	2.87099	3.65404	3.50428	3.51617	3.23701	3.80376
Unc5c	4.95874	4.71044	4.46045	4.65453	4.52095	4.81679	2.90007	1.50844	2.46642	2.06339	1.12332	0.98333	1.30741	1.29292	1.01227	1.03587
Fam169a	3.80531	4.31994	4.9891	5.21524	5.02813	4.73067	0.98333	1.10476	0.98333	1.08506	0.98333	1.17552	1.04793	0.98333	0.98333	1.03587
Erich3	5.35435	5.80176	4.41144	4.26334	4.36859	3.813	2.55992	3.42544	2.2528	2.60727	1.52787	1.34509	1.22599	1.54767	1.36622	1.08656
Plppr5	3.53351	4.00121	5.02823	5.15839	5.13447	5.13011	0.98333	0.98333	0.98333	0.98333	0.98333	0.98333	1.25364	1.14641	1.22501	1.35817
Fahd2a	4.57237	4.13283	4.76358	4.90549	4.77632	4.83418	3.93584	2.87944	2.59307	3.29995	2.87099	3.06397	2.9155	2.58479	2.46006	2.22957
Pcyt1b	3.21464	3.98491	5.17126	4.92834	5.26749	5.41333	1.82575	1.26965	0.98333	1.4893	0.98333	1.11426	0.98333	0.98333	0.98333	0.98333
St8sia1	3.77263	4.35208	4.85348	4.82253	5.15514	4.99917	2.55992	1.46374	0.98333	1.10941	0.98333	0.98333	1.01599	0.98333	1.04064	1.31631
Dact1	5.67337	4.56995	4.08015	4.20838	4.8327	4.57385	3.2952	2.55656	3.155	3.284	2.23165	2.14359	2.31169	2.26792	2.04974	2.33815
Pamr1	5.31706	4.9136	4.2845	4.22693	4.40622	4.77537	1.46517	1.99039	2.48832	1.66386	1.36815	1.29075	1.48121	1.54767	1.51519	1.37866
Extl1	3.19833	3.98491	5.1207	5.30529	5.16144	5.14413	1.24427	1.26965	2.46642	1.86316	2.13571	2.79786	2.817	3.02303	2.11791	2.43914
Shisal1	3.78361	4.15486	5.01394	4.72148	5.3007	4.93971	1.24427	1.32067	0.98333	1.33266	1.18853	1.11426	1.16904	1.29292	1.04064	1.11125
Rab40b	3.98723	3.63394	5.28787	5.07891	4.93188	4.97847	1.97705	2.27544	2.44419	2.84333	2.40629	2.04854	2.25809	1.86126	2.33963	2.30643
Lrrc10b	3.83727	4.06465	5.09765	4.88227	5.29641	4.6236	3.77991	3.5267	4.13159	3.26244	1.12332	1.17552	1.1397	1.14641	1.14886	1.13553
Kcnh1	3.50726	3.9005	4.87849	4.81028	5.18483	5.48727	3.2952	4.33665	3.22187	4.08733	1.5774	1.49681	1.7377	1.76411	1.70442	1.62146
Fbln7	5.76483	5.00537	4.00367	3.49931	4.28158	5.21222	0.98333	1.10476	0.98333	0.98333	1.18853	1.54404	1.40927	1.29292	1.57461	1.45781
Grik3	3.85819	4.34571	4.99743	4.99481	4.77015	4.78335	1.82575	0.98333	0.98333	2.58139	0.98333	1.17552	1.25364	0.98333	1.04064	1.39886
B230217C12Rik	3.9777	4.13283	4.86717	4.97299	4.88885	4.88513	0.98333	1.32067	1.04372	0.98333	1.25093	1.63409	1.65717	1.14641	1.36622	1.51445
Bicd1	3.90919	3.93486	5.3181	5.26994	5.11024	4.17639	1.46517	1.82352	2.70949	2.52819	1.80239	1.75942	2.38854	2.0379	2.55163	2.44886
Gpr27	4.39049	4.45035	4.56219	4.52558	4.8208	4.95746	2.74	1.92594	0.98333	2.44454	2.61045	2.67596	2.67083	2.19524	2.52175	2.13641
Gpr22	3.3537	3.80157	4.91191	5.0163	5.26749	5.33133	0.98333	0.98333	0.98333	1.00944	2.74659	2.20365	2.8893	2.74612	2.41742	2.02386
Trim46	3.86853	4.27371	4.98282	4.96196	4.95019	4.54597	1.97705	1.50844	0.98333	0.98333	1.52787	1.63409	1.43365	1.76411	1.49483	1.53284
Gpr85	3.69337	3.85637	4.94458	4.97299	5.01601	5.08724	0.98333	1.04532	2.30308	1.33266	1.05502	0.98333	0.98333	0.98333	1.01227	1.00984
Fcho1	3.94874	3.73489	5.52953	5.314	4.91892	4.1113	1.82575	1.41761	0.98333	0.98333	1.18853	1.63409	1.54974	2.0379	1.14886	1.51445
Klhl29	4.21511	4.24662	4.72649	4.85867	5.00027	4.5007	2.90007	2.02156	2.2007	3.43131	1.25093	1.29075	1.1978	0.98333	1.55508	1.25114
Cdh22	3.49396	3.93486	5.03634	4.96196	5.03157	5.08077	1.46517	1.04532	1.21107	1.78973	1.67165	1.44799	1.40927	1.54767	1.47417	1.22875
Gpr153	4.46055	4.19084	4.79974	4.77289	4.82874	4.46641	3.04414	2.94596	2.94937	2.41554	2.61045	2.61092	2.65017	2.9365	2.54174	2.17205
Chrnb2	3.39723	3.88301	5.05441	4.87052	5.22299	5.08077	0.98333	1.82352	0.98333	1.20289	1.31073	1.34509	1.1978	1.29292	1.17469	1.22875
Srrm4	3.53351	4.09535	5.05041	5.20592	5.09385	4.51755	0.98333	0.98333	0.98333	0.98333	2.10226	1.67709	1.9554	2.0379	1.70442	1.62146
Gfra2	3.89914	4.23976	4.86034	4.66817	4.8068	5.00089	4.04264	2.32626	3.45098	2.79911	1.31073	1.05028	1.25364	1.54767	1.17469	1.06143
Vstm2b	4.14023	4.16936	4.81159	4.46435	4.94655	4.93255	1.82575	1.04532	1.45295	1.08506	0.98333	0.98333	0.98333	0.98333	1.01227	0.98333
Zmat4	3.42554	4.14021	4.87623	4.90549	4.89831	5.15647	1.24427	0.98333	1.80666	1.45171	0.98333	0.98333	1.01599	0.98333	0.98333	1.03587
Med12l	3.93895	4.33288	5.12641	4.83468	4.91892	4.22408	1.97705	1.32067	1.69812	1.52595	1.36815	1.94679	1.698	1.42591	1.59389	1.551
Zfyve28	3.59711	4.04905	5.28617	5.66638	4.77838	3.9924	1.24427	1.32067	0.98333	0.98333	1.05502	1.17552	1.22599	1.29292	1.20007	1.13553
Syt9	4.39049	3.97669	4.57059	4.59864	4.88314	4.93435	1.6567	1.04532	2.69073	1.22535	0.98333	0.98333	1.04793	0.98333	0.98333	1.03587
Myoc	2.09535	2.54746	6.54735	6.57787	6.03699	3.50567	0.98333	0.98333	0.98333	1.00944	1.42338	1.79889	1.59367	2.11871	1.49483	1.72108
Bicdl1	4.48766	4.67022	4.74392	4.46435	4.72406	4.21526	2.55992	2.02156	1.62093	1.74381	3.31247	3.06397	2.94971	2.79612	3.142	2.91638
Fam110b	4.174	4.28707	4.63071	4.31628	4.87165	5.00431	2.65276	1.50844	1.45295	1.86316	1.52787	1.79889	1.97215	2.11871	1.53527	1.53284
Npy1r	5.08832	4.65999	4.45139	4.44863	3.89962	4.72239	1.97705	1.59389	0.98333	1.66386	1.12332	1.05028	1.1978	1.42591	1.12256	1.25114
Medag	4.811	4.59702	4.23957	4.07137	4.54284	5.00601	3.23641	2.27544	1.58073	1.56168	1.99697	1.87474	2.29848	2.26792	2.60009	2.25195
Tmem25	4.00609	3.98491	4.90529	4.90549	4.8327	4.59668	0.98333	1.10476	0.98333	1.03509	1.67165	1.67709	1.40927	1.54767	1.38847	1.53284
Mtmr7	3.71646	3.94332	4.88299	5.0163	4.70262	4.95569	2.23904	1.26965	1.40771	1.35319	1.12332	1.29075	1.50442	1.29292	1.09577	1.58666
Csmd1	3.75043	3.99309	5.35097	5.40642	5.03501	3.67395	2.74	1.10476	3.20874	3.0835	0.98333	0.98333	1.16904	1.14641	1.09577	1.03587
Tmem121b	3.572	4.08008	4.98492	4.88227	4.86201	4.81289	1.24427	1.32067	1.21107	1.75928	0.98333	0.98333	0.98333	0.98333	0.98333	0.98333
Grem2	4.76744	4.42036	4.39262	4.46435	4.26705	4.87209	3.93584	3.25227	3.37074	3.67918	0.98333	1.17552	0.98333	0.98333	0.98333	1.00984
Sidt1	4.11439	4.31343	4.61726	4.65453	4.71552	4.7613	1.46517	1.50844	1.04372	1.94662	1.52787	1.54404	2.09951	2.69432	1.43196	1.99761
Zfp536	4.66432	4.16213	4.6546	4.59864	4.42206	4.6609	1.6567	0.98333	0.98333	0.98333	1.25093	1.17552	1.1978	0.98333	1.38847	1.22875
Arhgap42	4.84284	4.42036	4.70377	4.59864	4.466	4.10494	3.23641	3.42544	3.18212	3.50658	2.61045	2.14359	2.63973	2.58479	2.53178	2.56959
Rragb	4.21511	4.54236	4.83501	4.82253	4.44031	4.27591	0.98333	1.32067	0.98333	1.24746	1.42338	1.23429	1.48121	1.29292	1.34362	1.43842
Sox10	2.78297	3.6853	5.09571	5.18709	4.89453	5.475	0.98333	0.98333	0.98333	0.98333	0.98333	0.98333	1.07917	0.98333	1.01227	1.08656
Nanos1	4.14023	4.76398	4.54809	4.3335	4.62265	4.70148	1.97705	2.19567	2.0905	2.1481	1.84346	1.34509	1.79529	1.86126	1.59389	1.91587
Mrgprf	6.3926	5.23986	3.35104	3.1171	4.37402	4.55766	0.98333	1.21675	0.98333	0.98333	1.12332	1.05028	1.28078	1.29292	1.17469	1.18289
Nudt11	3.54646	4.16936	4.80211	4.77289	4.95383	4.78534	0.98333	1.10476	2.11885	1.00944	1.92226	2.1126	2.31169	2.11871	1.9183	2.52434
Ccdc92b	3.80531	3.84738	4.68327	4.83468	4.84841	5.00431	0.98333	1.04532	0.98333	1.03509	1.05502	1.11426	1.07917	1.14641	1.27363	1.13553
Pcnx2	3.24672	4.03328	5.06633	5.02692	5.00554	4.63688	1.82575	1.26965	0.98333	1.20289	0.98333	1.11426	1.1397	0.98333	0.98333	1.13553
Mmp24	3.70496	4.33931	4.72899	4.96196	4.78043	4.49343	1.6567	1.21675	1.66004	1.56168	1.18853	1.11426	1.1978	1.42591	1.17469	1.13553
Susd2	4.78939	4.79704	4.20044	3.9868	4.39824	4.8361	2.11398	2.37536	2.2528	1.83424	2.43345	2.28929	2.56444	2.9365	2.31661	2.25195
Fbxl2	3.72787	4.06465	4.97862	4.79792	4.68959	4.74504	1.97705	1.46374	0.98333	1.43254	1.71655	1.91121	1.7377	2.0379	1.57461	1.70494
Msi1	3.6095	3.4679	4.94673	5.0992	5.3064	4.56462	2.35411	1.04532	1.66004	1.10941	0.98333	0.98333	1.07917	0.98333	0.98333	0.98333
B4galnt4	3.30882	4.19084	5.14901	4.72148	4.96468	4.64566	0.98333	1.04532	0.98333	1.08506	1.18853	1.11426	1.33356	1.29292	1.36622	1.1594
Dpf1	3.42554	3.86531	4.95744	4.92834	5.12321	4.63908	1.97705	1.21675	1.93975	1.96007	1.05502	1.17552	1.01599	0.98333	1.06847	1.13553
Ripor2	4.20698	4.29371	4.6781	4.78546	4.65651	4.29558	3.85998	3.65153	1.97119	2.44454	1.62529	2.17393	2.11467	1.54767	2.40656	2.78442
Cacna1h	3.75043	3.5698	5.25526	5.23371	4.85231	4.2531	1.82575	1.46374	0.98333	1.13335	1.62529	1.44799	1.54974	1.42591	1.12256	1.49581
Tmem56	3.59711	4.19794	4.9316	4.72148	4.93372	4.51755	1.97705	2.32626	2.32758	2.25018	1.99697	2.04854	2.51959	2.0379	2.39562	2.44886
Lingo3	2.96755	3.89179	4.93377	4.93963	5.01775	5.11596	0.98333	0.98333	1.45295	0.98333	1.25093	1.39746	1.45763	1.14641	1.36622	1.37866
Hnmt	5.30187	4.56995	4.28109	3.84987	4.48873	4.37166	1.24427	1.50844	1.49681	1.68021	1.80239	1.67709	1.63631	1.86126	1.9782	1.51445
Rimklb	3.2625	3.82007	5.23074	5.14869	4.94837	4.43636	2.23904	1.32067	1.62093	1.94662	0.98333	0.98333	0.98333	0.98333	0.98333	1.00984
Syt17	3.48053	3.63394	4.83501	4.81028	5.15356	4.91813	2.55992	1.5518	2.44419	2.67409	1.12332	1.39746	1.1397	1.14641	1.09577	1.08656
Efna3	3.32394	3.69535	4.95102	4.77289	5.10371	4.98194	1.6567	0.98333	1.49681	0.98333	1.47657	1.39746	1.16904	1.14641	1.20007	1.27319
Maneal	3.38287	3.89179	4.74392	4.87052	5.06725	4.86271	0.98333	1.32067	0.98333	0.98333	1.52787	1.63409	1.67773	1.14641	1.59389	1.82922
Sowaha	3.7945	4.3959	4.51367	4.52558	4.85814	4.72653	1.46517	0.98333	0.98333	0.98333	0.98333	1.05028	1.01599	1.29292	1.04064	1.00984
Trpc3	3.14825	3.50267	5.31144	5.50852	4.94837	4.35033	1.82575	1.46374	2.06159	2.44454	2.40629	2.49554	2.23053	2.6406	2.18299	2.12433
Cacna2d3	3.19833	3.62345	5.18591	5.06866	4.82279	4.86835	0.98333	1.16184	2.14665	1.22535	0.98333	1.05028	1.04793	0.98333	1.34362	1.39886
Slit2	4.80023	4.71539	4.44836	3.96487	4.43512	4.40308	3.2952	2.91308	2.53113	2.63269	1.71655	1.79889	1.88642	1.42591	1.51519	1.60416
C530008M17Rik	4.27078	4.79704	4.51367	4.36734	4.22253	4.58074	0.98333	1.16184	1.58073	1.13335	1.05502	1.17552	1.01599	1.29292	1.38847	1.25114
Fam19a1	3.68168	3.72511	4.92069	4.7345	4.75565	4.89989	2.35411	1.5518	1.8411	1.89152	1.05502	0.98333	1.01599	0.98333	0.98333	1.00984
Meis3	4.02472	3.79223	4.74392	4.84672	4.83467	4.45896	3.04414	2.22275	3.47311	2.64106	2.13571	1.87474	1.79529	1.86126	1.93351	1.49581
Bmpr1b	2.90861	2.77311	5.74884	5.52361	5.80811	3.88893	0.98333	2.05208	1.04372	1.57922	0.98333	0.98333	0.98333	0.98333	0.98333	0.98333
Lrrn1	3.83727	3.85637	4.75869	4.59864	4.75356	4.79524	0.98333	1.04532	0.98333	0.98333	3.75063	2.28929	3.03982	2.89121	2.96827	3.73393
Prdm6	5.70835	4.92647	3.6599	3.33799	4.16724	4.77937	3.11112	2.94596	2.9335	3.36713	0.98333	1.11426	1.01599	0.98333	0.98333	1.00984
Sorcs2	3.46698	3.75426	4.94888	4.72148	4.86008	4.81873	2.55992	2.19567	2.90122	1.31182	1.76011	1.67709	2.21654	2.0379	1.49483	1.68863
Rorb	3.3537	3.87419	4.90529	5.19654	4.92077	4.27024	0.98333	1.16184	0.98333	1.10941	1.12332	1.05028	1.1397	1.29292	1.12256	1.18289
Cbs	4.07918	3.95174	4.77331	4.64076	4.58095	4.46145	1.97705	1.71327	1.97119	1.08506	1.12332	1.11426	1.07917	0.98333	1.01227	1.11125
Nacad	3.18183	3.75426	5.11114	4.91696	4.77838	4.7286	1.82575	1.21675	0.98333	1.59655	1.18853	1.34509	1.16904	1.65994	1.32067	1.18289
Dact2	4.14023	3.99309	4.52235	4.46435	4.53315	4.77337	0.98333	0.98333	0.98333	1.00944	1.31073	1.11426	1.48121	1.42591	1.82351	1.45781
Iglon5	3.36836	3.28022	5.02008	4.96196	5.05207	4.6824	0.98333	0.98333	0.98333	1.00944	0.98333	0.98333	1.01599	0.98333	0.98333	1.00984
Cldn10	2.84715	3.04883	5.22544	5.0163	5.60578	4.61244	2.23904	2.11124	2.94937	2.62426	0.98333	1.11426	0.98333	1.14641	1.01227	0.98333
Hs6st2	4.27856	4.50283	4.50786	4.43274	4.23155	4.37958	0.98333	1.10476	0.98333	1.22535	1.80239	1.94679	2.37601	2.0379	2.17021	2.72166
Shisa9	3.30882	3.98491	4.73647	4.81028	4.82874	4.65003	1.82575	2.53512	1.49681	1.29069	1.31073	1.34509	1.33356	1.14641	1.49483	1.551
Aox3	5.71123	5.4415	3.53961	3.1171	4.07009	4.41597	2.74	2.89636	2.39867	2.84333	1.25093	1.29075	1.16904	1.14641	1.14886	1.13553
Igsf11	2.73853	3.21182	5.3926	5.41454	5.32055	4.17639	2.11398	1.16184	2.39867	1.41311	0.98333	0.98333	1.01599	0.98333	1.04064	1.03587
Bdh2	5.49788	4.47391	3.72151	4.05069	3.89585	4.57615	2.46068	1.21675	2.03208	1.96007	1.12332	1.05028	1.1397	1.29292	1.06847	1.11125
Abcd2	3.39723	3.82007	4.82335	4.70833	4.89642	4.5623	1.6567	1.95852	2.11885	1.91933	1.31073	1.44799	1.38447	1.14641	1.43196	1.551
Gk	4.41187	4.18372	4.63071	4.61281	4.50617	3.84766	2.82225	2.05208	2.55208	2.68223	2.89072	2.7382	2.7603	3.14381	2.48092	2.52434
Mkx	4.68788	4.51423	4.18958	3.94259	4.35215	4.45147	1.24427	1.04532	1.31274	1.08506	0.98333	0.98333	1.01599	1.29292	0.98333	1.03587
Rasal1	3.59711	3.85637	4.85577	4.56986	4.63855	4.57385	2.23904	1.21675	1.73521	0.98333	0.98333	0.98333	0.98333	0.98333	1.01227	0.98333
Napepld	5.45733	5.06087	3.60646	3.64439	4.03963	4.27308	1.24427	1.41761	0.98333	1.24746	2.70262	2.44667	2.60794	2.79612	2.52175	2.74552
Lcat	3.36836	3.80157	4.88523	4.79792	4.7431	4.46641	0.98333	1.50844	1.73521	1.6306	1.31073	1.44799	1.22599	0.98333	1.27363	1.31631
Ephx4	3.46698	3.52539	4.75132	4.65453	4.79671	4.85894	1.24427	1.21675	1.04372	1.37344	1.12332	0.98333	1.10976	1.14641	1.14886	0.98333
Flrt3	4.19881	4.55346	4.08797	4.2812	4.08343	4.81484	2.35411	2.22275	3.41714	3.11991	1.5774	1.58976	1.88642	1.86126	1.55508	1.81426
Tubg2	3.32394	3.71526	4.69099	4.83468	4.77427	4.67598	1.82575	1.10476	1.361	1.68021	1.84346	1.54404	1.9554	2.11871	1.38847	1.45781
Hook1	3.49396	4.07239	5.17126	5.22451	4.43252	3.59453	2.11398	2.11124	3.48405	1.61367	1.84346	1.94679	1.97215	2.26792	2.06364	2.14839
Slc9b2	5.1784	4.78296	3.55661	3.9868	3.69763	4.78534	0.98333	1.10476	1.90761	1.64732	1.12332	0.98333	1.22599	0.98333	1.06847	1.11125
Chrd	4.51426	4.23287	4.41455	4.70833	4.40622	3.67824	1.82575	1.32067	0.98333	0.98333	1.67165	1.71884	1.33356	1.54767	1.38847	1.22875
Slc16a6	5.19494	4.219	4.03232	4.0297	4.1766	4.25884	2.35411	1.5518	1.87474	1.18008	2.13571	1.83731	1.88642	1.54767	2.04974	1.78386
Galnt13	4.32438	4.14755	4.41455	4.47991	4.18281	4.36103	0.98333	1.10476	1.66004	1.43254	0.98333	0.98333	0.98333	0.98333	0.98333	1.00984
Fads6	3.4533	3.66497	4.74639	4.54049	4.92819	4.56462	1.82575	1.63479	3.5891	2.48232	1.42338	1.11426	1.54974	1.29292	1.38847	1.25114
Ankrd24	3.48053	3.94332	4.88074	4.84672	4.68304	4.05637	1.97705	2.42284	1.2628	2.29333	2.87099	2.96334	2.89808	2.84445	2.56145	2.42935
Trpm3	4.72821	4.59702	4.18958	4.20838	4.03963	4.12393	0.98333	1.46374	2.72801	1.03509	2.58645	2.69701	2.66054	2.58479	3.05427	3.29609
Zkscan2	4.49435	3.76385	4.63338	4.66817	4.31871	3.93981	2.11398	1.67456	3.35891	1.72817	1.52787	1.49681	1.43365	1.29292	1.72205	1.62146
Zfp940	3.43948	3.63394	4.71896	4.85867	4.61808	4.53656	1.6567	2.69836	2.11885	3.13778	2.29225	2.23276	2.33777	2.33711	2.68343	2.48709
Fam19a2	4.14875	4.27371	4.2879	4.22693	4.40887	4.45896	0.98333	0.98333	0.98333	0.98333	0.98333	0.98333	1.10976	1.14641	0.98333	0.98333
Ugt8a	2.92852	3.5915	4.96807	5.0163	4.44549	4.83418	1.24427	1.04532	0.98333	0.98333	0.98333	1.11426	1.01599	0.98333	1.01227	1.11125
Lrrc73	3.38287	3.63394	4.55375	4.76021	4.7431	4.70988	2.11398	1.71327	2.55208	2.1363	1.05502	1.05028	1.16904	0.98333	1.14886	1.13553
Mdga2	3.23077	3.61288	4.77815	5.03747	4.96288	4.11447	0.98333	1.04532	0.98333	1.08506	1.76011	1.23429	1.35924	0.98333	1.45322	1.41877
Tmem198	3.04257	3.89179	4.59274	4.55525	4.94289	4.70358	1.24427	1.36996	0.98333	0.98333	0.98333	0.98333	0.98333	0.98333	1.06847	1.03587
Tnfrsf11b	6.17019	5.4174	3.37041	3.37173	3.26029	4.1302	1.46517	2.77354	1.58073	1.59655	1.12332	1.05028	1.01599	0.98333	1.04064	0.98333
Trpc1	3.41145	3.71526	4.79258	5.03747	4.71338	4.04646	2.23904	2.37536	1.87474	3.10182	2.35039	2.17393	2.24438	2.26792	2.26944	2.56959
Slain1	3.59711	4.18372	4.54809	4.36734	4.52828	4.48855	0.98333	1.41761	0.98333	1.35319	1.05502	0.98333	1.30741	1.29292	0.98333	1.11125
Amt	4.15721	3.98491	4.32807	4.54049	4.69177	4.00269	2.74	1.59389	1.93975	2.07581	1.18853	1.29075	1.28078	1.29292	1.45322	1.27319
Klhdc8a	4.61601	3.93486	4.41144	3.84987	4.23752	4.65221	2.82225	2.446	2.85141	2.30392	2.40629	2.54281	2.17376	2.6406	2.77071	1.98431
Tmem163	2.90861	3.28022	4.70122	4.76021	4.75147	5.28711	3.40605	2.13994	1.8411	2.44454	1.12332	1.11426	1.1978	1.14641	1.32067	1.33739
Shisa6	3.23077	3.84738	4.44227	4.56986	4.66541	4.92716	0.98333	1.21675	0.98333	0.98333	1.31073	1.11426	1.25364	1.29292	1.20007	1.03587
Ppp4r4	4.09689	3.79223	4.61185	4.77289	4.466	3.92546	3.17513	1.82352	0.98333	2.07581	1.12332	1.17552	1.50442	1.14641	1.53527	1.27319
Nr4a2	3.6699	4.38351	4.25355	4.31628	4.22253	4.81679	2.46068	2.61905	2.22699	2.21695	2.06801	1.91121	2.17376	2.40313	2.36229	2.681
Gspt2	3.72787	3.6853	4.40832	4.52558	4.40887	4.85136	2.65276	1.82352	1.8411	2.79911	1.62529	1.44799	1.65717	1.65994	1.55508	1.58666
Gjc3	3.30882	3.85637	4.90086	5.0163	4.3494	4.16727	0.98333	1.04532	0.98333	0.98333	0.98333	0.98333	0.98333	0.98333	1.04064	1.03587
Gfra1	2.90861	3.45612	4.84196	4.64076	4.94472	4.80115	2.9739	2.37536	3.52699	2.82874	1.42338	1.67709	1.9887	2.11871	1.68658	1.551
Astn2	3.07866	3.79223	4.53098	4.51052	4.76602	4.90904	3.23641	2.02156	2.63293	3.36207	1.9601	1.94679	2.28514	1.65994	2.351	2.4965
Six1	5.3246	4.37728	3.40211	3.37173	3.89206	5.21074	1.82575	1.71327	3.29823	1.84877	1.42338	1.05028	1.1978	1.42591	1.53527	1.18289
NA	3.21464	3.50267	4.72147	4.95084	4.58564	4.58303	1.46517	1.21675	0.98333	0.98333	2.10226	2.2613	2.7603	2.84445	2.30496	2.17205
Slc19a1	5.16587	4.60237	3.91415	4.17054	3.65806	4.04646	1.6567	1.36996	0.98333	1.61367	1.31073	1.98151	2.03724	1.54767	1.63168	1.72108
Cacna1d	3.63396	3.98491	5.01804	4.83468	4.50369	3.55778	3.2952	2.08197	2.57272	2.5372	1.18853	1.39746	1.25364	0.98333	1.17469	1.18289
C1qtnf7	5.23147	4.41428	3.70635	3.4047	4.15149	4.61244	2.23904	2.42284	1.87474	3.10182	2.06801	2.23276	2.41327	2.40313	2.03572	2.32766
Kcnc4	3.59711	4.3959	4.47543	4.40041	4.18591	4.44896	0.98333	0.98333	1.04372	0.98333	1.76011	2.04854	1.81398	1.86126	1.73946	2.12433
Mdga1	3.3389	3.61288	4.57616	4.54049	4.52828	4.90356	1.24427	1.10476	0.98333	1.03509	1.92226	1.49681	2.05306	1.65994	1.73946	1.58666
Rnf165	3.38287	3.84738	4.58447	4.35052	4.74938	4.56924	2.11398	1.41761	3.22187	2.07581	1.80239	1.44799	1.45763	0.98333	1.57461	1.95732
Arsg	3.86853	3.90917	4.47543	4.40041	4.3549	4.45147	1.82575	2.4688	2.22699	1.10941	1.80239	1.54404	2.03724	1.76411	1.63168	1.73703
Lrrtm3	3.07866	3.62345	4.67551	5.0163	4.30739	4.70148	0.98333	0.98333	0.98333	0.98333	0.98333	1.05028	1.04793	0.98333	1.01227	1.06143
Tmem28	3.87881	3.89179	4.27426	4.35052	4.49373	4.49099	3.11112	2.08197	3.69646	3.50658	0.98333	0.98333	0.98333	0.98333	1.04064	0.98333
Slc25a27	3.59711	3.45612	5.05041	4.89393	4.59963	3.76946	1.82575	1.46374	1.45295	1.6306	1.84346	2.17393	1.92133	1.65994	1.79047	1.76842
Slc8a3	3.32394	3.62345	4.57894	4.61281	4.47108	4.72653	0.98333	1.10476	0.98333	1.41311	1.05502	0.98333	1.01599	0.98333	1.04064	1.03587
Tiam2	3.68168	3.91779	4.53385	4.61281	4.466	4.10813	0.98333	1.10476	1.2628	0.98333	1.36815	1.44799	1.25364	1.42591	1.32067	1.56894
Ptpro	3.13117	2.86506	4.88748	4.70833	4.95383	4.76331	3.35169	1.5518	2.46642	2.35573	1.31073	1.83731	1.40927	1.65994	1.14886	1.18289
Dync2h1	4.15721	4.09535	4.41766	4.47991	4.56202	3.58999	2.90007	3.025	3.68702	2.59006	2.10226	2.04854	2.03724	2.19524	1.77367	2.14839
Mblac2	3.98723	4.23976	4.2845	4.46435	4.1766	4.13332	2.74	1.92594	3.01117	2.82874	1.9601	2.37013	2.66054	2.46626	2.47053	2.86649
Znrf3	4.31684	4.50283	4.25702	4.24525	4.34386	3.61704	2.90007	3.53753	2.35167	3.07116	2.20038	2.23276	2.38854	2.11871	2.11791	2.57848
Lmod1	4.90949	4.3959	4.07622	3.84987	3.99445	4.00951	2.35411	2.82746	1.361	2.34551	1.62529	1.29075	1.88642	1.76411	1.43196	1.73703
Tspan33	3.16514	3.16916	4.70122	4.85867	4.77838	4.5623	1.6567	1.32067	0.98333	0.98333	1.18853	1.17552	1.28078	1.54767	1.14886	1.08656
Plekhf1	5.369	4.219	3.60101	3.49931	4.38214	4.13955	1.6567	2.11124	1.69812	2.22812	3.07446	2.77825	2.94124	2.9365	3.01191	2.9981
Slc29a4	3.38287	3.82007	4.54525	4.46435	4.45578	4.51755	3.17513	1.50844	2.06159	2.98824	2.70262	2.47131	2.73108	2.52674	2.18299	2.87372
Angptl7	5.47437	4.79704	3.29134	3.1171	3.79407	4.67813	1.6567	1.8926	1.66004	1.68021	1.52787	1.29075	1.93847	1.76411	1.41038	1.99761
Slco4a1	5.29805	4.16936	3.50498	3.67173	4.09335	4.40308	2.23904	1.10476	0.98333	1.74381	0.98333	1.05028	1.01599	1.14641	0.98333	1.00984
Lrfn1	3.19833	3.37085	4.45139	4.35052	4.86395	4.89068	1.46517	1.95852	1.66004	1.68021	0.98333	1.05028	1.30741	0.98333	1.09577	1.1594
Asphd1	3.18183	3.51408	4.47841	4.58432	4.4609	4.82067	1.24427	0.98333	0.98333	0.98333	1.12332	1.17552	1.38447	0.98333	1.14886	1.31631
Efhd1	3.71646	3.50267	4.48138	4.15124	4.58095	4.58303	0.98333	1.10476	0.98333	0.98333	1.25093	1.49681	1.75715	1.76411	1.53527	1.70494
Trim66	3.2625	3.82923	4.53956	4.59864	4.42991	4.33412	0.98333	1.16184	0.98333	1.33266	1.18853	1.05028	1.28078	1.29292	1.06847	1.08656
Map6d1	3.43948	3.72511	4.48435	4.09175	4.60658	4.64127	0.98333	0.98333	0.98333	0.98333	1.05502	0.98333	1.10976	1.14641	1.01227	0.98333
Moxd1	5.07944	4.29371	3.59004	3.49931	4.39824	4.08571	1.24427	1.71327	0.98333	0.98333	1.12332	1.39746	1.28078	1.42591	1.24953	1.206
Trpm2	3.04257	3.78283	4.59823	4.84672	4.57151	4.08248	2.55992	1.46374	1.31274	1.68021	1.05502	1.05028	1.01599	0.98333	0.98333	1.03587
Mfsd4a	3.32394	3.3067	4.64403	4.76021	4.53558	4.33683	1.6567	1.50844	1.04372	1.18008	2.03293	1.44799	2.68105	2.40313	2.60959	2.53351
Plpp7	3.83727	3.94332	4.22547	4.13169	4.17971	4.49828	0.98333	1.32067	0.98333	1.22535	2.48627	3.31602	2.77945	2.52674	3.03325	2.72166
Ttll11	3.02417	3.23957	4.67291	4.56986	4.72193	4.55299	2.35411	1.50844	2.96507	2.42527	1.25093	1.29075	1.16904	1.65994	1.27363	1.22875
Evi2a	2.66921	2.98468	4.82569	4.85867	4.57151	4.85705	2.82225	1.71327	2.2007	1.91933	1.47657	1.29075	1.61515	1.54767	1.09577	1.22875
Grin3a	2.35284	3.23957	4.94026	4.74741	4.81881	4.6609	1.46517	1.75096	1.80666	2.01266	1.31073	1.34509	1.43365	1.29292	1.27363	1.60416
Slitrk4	3.19833	3.62345	4.71138	4.52558	4.42206	4.2617	0.98333	0.98333	1.10169	0.98333	1.05502	1.23429	1.28078	1.42591	1.04064	1.22875
Twist1	5.09274	4.27371	3.51662	3.1171	4.13558	4.59668	0.98333	1.04532	0.98333	0.98333	1.42338	2.04854	2.21654	1.95228	1.96346	2.0108
Ddit4l	3.30882	3.74461	4.64668	4.3335	4.21649	4.46393	2.35411	1.7877	2.91745	1.89152	2.13571	2.65461	2.7699	2.46626	1.79047	2.4965
Slc6a15	2.94817	3.63394	4.65196	4.56986	4.51111	4.39789	1.82575	1.5518	0.98333	1.13335	0.98333	0.98333	0.98333	0.98333	1.04064	1.00984
Tom1l1	3.75043	3.06444	4.63872	4.66817	4.41152	4.12078	2.65276	2.19567	2.32758	1.57922	2.03293	2.08093	2.28514	2.33711	2.30496	2.43914
Zdbf2	3.04257	3.75426	4.45744	4.44863	4.51849	4.4134	1.24427	1.21675	2.06159	2.87918	1.05502	0.98333	1.25364	1.14641	1.12256	1.206
Spred3	3.6095	3.4679	4.38946	4.79792	4.28447	4.05307	1.6567	1.5518	2.2007	2.02551	1.67165	1.58976	1.85066	1.54767	1.57461	1.95732
Pdgfrl	5.25138	4.37102	3.39583	3.49931	3.96953	4.06294	1.24427	1.50844	1.04372	1.29069	1.62529	1.94679	2.44959	2.79612	1.87168	2.48709
Kcne4	4.50102	3.78283	3.67035	3.84987	3.92577	4.79327	2.90007	1.63479	0.98333	3.07734	1.71655	1.34509	1.35924	1.65994	1.29734	1.35817
4931428F04Rik	3.58461	3.76385	4.30812	4.44863	4.22855	4.17335	2.55992	2.19567	2.27816	1.74381	2.10226	2.28929	2.23053	1.86126	1.93351	1.8732
Erbb4	3.21464	3.79223	4.37356	4.51052	4.62721	3.97508	0.98333	1.16184	0.98333	1.03509	1.52787	1.49681	1.63631	1.95228	1.66851	1.58666
Tlcd1	3.81605	3.42019	4.06041	4.64076	4.34109	4.20043	2.23904	2.11124	1.15741	1.91933	1.67165	1.58976	1.7377	1.14641	1.90293	1.73703
Wnt7b	2.78297	3.23957	4.6677	4.7345	4.79469	4.21526	3.23641	1.99039	1.49681	1.89152	0.98333	1.05028	0.98333	0.98333	1.01227	0.98333
Npas2	2.90861	3.80157	4.33794	4.58432	4.81081	3.97508	1.24427	1.21675	2.22699	1.10941	1.31073	1.34509	1.16904	1.65994	1.06847	1.31631
Wdr34	3.78361	3.83834	4.37994	4.13169	4.19515	4.08893	2.74	2.57769	2.03208	2.68223	2.58645	2.2613	2.46149	2.6406	2.02155	2.22957
Ndst3	3.11388	3.5698	4.9075	4.56986	4.49373	3.74923	0.98333	1.21675	0.98333	0.98333	1.05502	0.98333	0.98333	0.98333	0.98333	1.00984
Rpgr	3.3389	3.51408	4.76845	4.89393	4.10648	3.77748	1.6567	2.79174	0.98333	2.1363	2.58645	2.44667	2.70127	2.9365	2.44952	2.50584
Tmem91	2.76092	3.09514	4.58171	4.41666	4.66319	4.87209	1.97705	0.98333	2.88481	1.64732	1.05502	0.98333	1.04793	1.14641	1.04064	1.06143
Zfp385b	3.43948	3.49117	4.48138	4.22693	4.28736	4.44896	0.98333	1.32067	1.49681	1.13335	1.31073	1.39746	1.65717	1.14641	1.36622	1.39886
Ralgps1	3.6699	3.83834	4.61996	4.56986	4.28158	3.39543	2.82225	1.99039	1.361	2.21695	2.43345	2.1126	2.02124	2.0379	2.36229	2.34858
Lix1	3.02417	3.44424	4.53098	4.46435	4.84449	4.05966	1.24427	2.08197	2.00195	1.22535	1.12332	1.34509	1.35924	1.29292	1.34362	1.47693
H2-Q1	5.74251	4.79236	3.10354	2.99252	3.50789	4.15194	0.98333	1.04532	0.98333	1.41311	0.98333	0.98333	0.98333	0.98333	0.98333	1.00984
AI854703	3.14825	3.53662	4.37994	3.9868	4.62494	4.59668	2.23904	1.36996	1.93975	1.37344	1.25093	1.44799	1.54974	1.86126	1.43196	1.18289
Gpr83	2.92852	2.95151	4.75624	4.81028	4.31871	4.47875	1.46517	1.04532	1.8411	1.31182	0.98333	0.98333	0.98333	0.98333	1.01227	1.00984
Clic6	4.02472	3.35825	4.16021	4.26334	4.09664	4.33412	3.40605	3.09995	2.94937	3.50658	0.98333	1.05028	1.04793	0.98333	1.09577	1.06143
Bmp2	4.29399	4.08774	3.58452	4.00841	3.8102	4.40308	2.11398	2.94596	2.03208	2.98166	1.84346	2.08093	1.85066	1.95228	1.47417	2.18374
Gls2	3.04257	3.5915	4.55657	4.36734	4.40887	4.2182	1.24427	1.26965	0.98333	0.98333	1.62529	1.39746	1.40927	1.65994	1.63168	1.37866
Sema4g	3.39723	3.69535	4.43616	4.11186	4.59498	3.94338	2.23904	1.21675	1.04372	0.98333	1.05502	0.98333	1.04793	0.98333	1.01227	1.06143
Fam184a	3.41145	3.4679	4.47245	4.46435	4.46854	3.88893	2.55992	1.7877	3.07044	2.50084	1.05502	1.17552	1.10976	1.14641	1.01227	1.13553
Esrrg	3.52045	3.73489	4.2845	4.18958	4.09335	4.33683	1.24427	1.46374	1.31274	1.03509	2.26227	2.54281	2.68105	2.58479	2.49123	2.66441
Slc2a12	5.11898	4.50854	3.42699	3.5591	3.41071	4.12706	2.55992	1.59389	2.0905	1.22535	1.47657	1.54404	1.88642	1.54767	1.38847	1.58666
Prelid3a	3.3537	3.53662	4.38312	4.17054	4.39557	4.28437	1.46517	1.10476	1.93975	1.74381	1.05502	1.05028	1.04793	1.14641	0.98333	1.03587
Wnt7a	2.78297	3.40801	4.65723	4.31628	4.88695	4.06294	3.8205	1.95852	3.46209	3.14957	1.12332	0.98333	1.01599	1.29292	1.04064	1.06143
Egfl8	3.59711	4.35842	3.82339	4.05069	3.83012	4.42109	2.23904	3.5158	2.50988	2.32487	1.52787	1.79889	1.59367	1.29292	1.65021	1.37866
Arxes1	2.80468	2.98468	4.49909	4.54049	4.68741	4.52471	0.98333	0.98333	0.98333	1.37344	1.05502	1.05028	1.07917	1.54767	0.98333	1.13553
Zfhx4	4.73388	4.23976	3.67555	3.87362	3.68893	3.78941	1.46517	1.32067	1.53938	1.47063	1.31073	1.29075	1.07917	1.14641	1.04064	1.25114
Nat8f4	3.69337	3.75426	4.31813	3.9868	4.29884	3.94338	0.98333	1.5518	0.98333	1.00944	1.05502	1.44799	1.33356	1.76411	1.29734	1.551
Wnt5b	4.71106	4.26023	3.80453	3.69857	3.55173	3.95402	1.6567	1.32067	1.15741	1.29069	1.47657	1.63409	1.71799	1.76411	1.38847	1.60416
Phkg1	3.09638	3.21182	4.87623	4.65453	4.54042	3.57627	1.82575	1.10476	1.58073	1.69637	2.92939	2.87376	2.7699	2.6406	2.51165	2.11214
B3galt2	3.13117	3.67517	4.41455	3.82573	4.54525	4.35301	0.98333	1.16184	1.62093	1.00944	1.36815	1.49681	1.59367	1.29292	1.55508	1.70494
Rundc3b	3.39723	3.43226	4.19683	4.46435	4.12916	4.29278	0.98333	1.16184	0.98333	1.33266	2.13571	1.83731	2.48501	2.69432	2.18299	2.72966
Six2	5.15324	4.19084	3.27773	3.1171	3.4779	4.66523	0.98333	1.04532	0.98333	0.98333	1.47657	1.05028	1.25364	1.76411	1.34362	1.22875
Col4a6	4.30927	4.42036	3.47548	3.61652	3.73613	4.28437	1.97705	2.39929	0.98333	1.64732	1.31073	1.11426	1.30741	0.98333	1.22501	1.58666
Sdk1	4.67025	4.0093	3.59553	3.37173	3.83012	4.35569	1.97705	1.41761	2.2007	1.84877	2.13571	1.44799	1.86865	2.0379	1.53527	2.06236
Enox1	3.27811	3.40801	4.41455	4.18958	4.31871	4.21526	0.98333	0.98333	0.98333	0.98333	1.05502	0.98333	0.98333	0.98333	1.24953	1.06143
Fgf14	3.32394	3.98491	4.06041	3.91996	4.21043	4.30946	0.98333	0.98333	0.98333	0.98333	1.76011	1.63409	2.63973	2.74612	1.66851	2.06236
Plk5	3.23077	3.77337	4.64668	4.35052	4.23752	3.56243	2.35411	0.98333	0.98333	1.00944	1.12332	1.05028	1.35924	0.98333	1.06847	1.06143
Slc35g1	5.4912	4.75919	2.9996	2.80768	3.46267	4.27308	1.24427	1.63479	2.57272	1.13335	2.48627	1.71884	1.81398	2.19524	2.06364	2.0108
Ccl27a	3.19833	3.11025	4.38946	4.70833	4.22253	4.14885	2.23904	1.36996	1.90761	2.06339	1.31073	1.05028	1.22599	1.14641	1.36622	1.18289
Drd2	2.90861	3.44424	4.46346	4.43274	4.26705	4.25884	0.98333	0.98333	0.98333	0.98333	1.47657	1.23429	1.90398	1.95228	1.53527	1.43842
Rgs14	2.90861	3.47958	4.47543	4.66817	4.00149	4.23576	3.40605	1.85847	2.96507	2.90026	1.47657	1.17552	1.1978	1.42591	1.20007	1.53284
Izumo4	3.49396	3.14001	4.94888	4.90549	4.14832	3.06966	3.04414	1.63479	2.61314	2.56387	1.84346	1.44799	1.88642	1.95228	1.61291	1.551
Tpbg	3.63396	3.91779	3.9532	3.49931	4.13877	4.54832	1.46517	2.49125	0.98333	1.74381	1.05502	1.39746	1.92133	1.65994	1.17469	1.84403
Ptgfr	5.41913	4.62885	3.22197	3.15634	3.20035	4.05307	2.35411	2.80971	2.17393	3.36713	2.03293	1.71884	2.23053	2.0379	2.351	2.64763
Cib2	3.41145	3.09514	4.18958	4.35052	4.3494	4.26455	1.6567	2.27544	3.02622	2.12441	1.12332	1.29075	1.43365	0.98333	1.41038	1.43842
Sgtb	4.01543	4.31994	3.6599	4.0297	3.95509	3.66102	0.98333	2.05208	1.04372	1.89152	2.37861	2.44667	2.28514	1.86126	2.40656	2.76899
1500009L16Rik	4.43293	3.98491	3.55097	3.43693	4.10974	4.07274	2.46068	2.57769	1.40771	2.06339	1.42338	1.49681	1.71799	1.65994	1.41038	1.56894
Itga10	4.60986	3.9005	3.56224	3.84987	3.72341	3.93623	2.90007	1.50844	0.98333	1.54392	1.47657	1.83731	1.28078	1.14641	1.51519	1.31631
Efs	4.61601	4.26023	3.70635	3.75079	3.71058	3.52484	1.6567	1.41761	2.44419	1.10941	2.89072	1.39746	1.43365	1.54767	1.24953	1.35817
Trmt9b	3.3389	3.53662	4.30141	4.18958	4.06674	4.07924	2.11398	1.63479	1.31274	2.51002	1.8834	1.44799	1.88642	1.65994	2.15731	2.30643
Arhgap24	4.10567	3.67517	3.4146	4.11186	3.92577	4.27591	2.55992	2.16808	2.32758	2.05088	1.80239	1.94679	2.03724	1.65994	2.13116	2.08747
Ssc5d	3.49396	3.4679	3.85122	4.44863	3.98026	4.25884	2.82225	1.75096	3.35891	2.47297	1.62529	1.54404	1.88642	1.42591	1.47417	1.49581
Mrap	5.08389	3.61288	3.25012	3.19455	4.04304	4.23576	1.46517	1.04532	1.21107	1.33266	2.51198	2.31674	2.38854	2.33711	2.13116	1.79914
Cdh20	2.73853	2.67489	4.42076	4.55525	4.55485	4.47383	0.98333	1.04532	0.98333	1.45171	1.05502	0.98333	1.07917	1.14641	1.12256	1.11125
Adcy8	2.80468	2.98468	4.64137	4.40041	4.4273	4.09215	2.55992	2.73644	2.88481	2.22812	1.05502	1.05028	0.98333	0.98333	1.12256	1.00984
Grip2	3.23077	3.35825	4.55375	4.41666	4.25236	3.52959	0.98333	1.04532	0.98333	1.45171	2.10226	2.58857	1.65717	1.42591	1.83975	1.78386
S1pr5	2.94817	2.95151	4.30812	4.35052	4.03277	4.74504	1.6567	1.21675	1.40771	1.50774	1.12332	1.11426	1.04793	1.14641	1.06847	1.08656
Gldc	2.76092	2.73462	4.67291	4.65453	5.0264	3.4715	1.24427	2.30107	0.98333	1.33266	2.43345	2.65461	2.56444	3.3587	2.64698	2.82231
Carmil3	3.29355	3.50267	4.75378	4.82253	4.12594	2.80539	0.98333	1.04532	0.98333	1.10941	1.25093	1.49681	1.35924	1.29292	1.38847	1.27319
Tmem132c	3.96811	3.88301	3.69616	3.5881	3.88446	4.28156	2.23904	1.5518	2.39867	1.78973	1.12332	0.98333	1.1978	0.98333	0.98333	1.08656
Lrrc55	2.51968	3.14001	4.55375	4.36734	4.33831	4.35301	0.98333	0.98333	1.77138	0.98333	2.29225	2.37013	2.55336	2.26792	1.96346	2.42935
Fam241b	3.95846	3.54777	3.86038	3.89698	3.88827	4.076	1.46517	1.26965	0.98333	1.74381	1.52787	1.63409	1.35924	1.65994	1.49483	1.43842
Rhof	3.29355	3.58069	3.94461	3.89698	4.13558	4.33412	1.6567	1.50844	2.06159	1.20289	1.12332	1.34509	1.38447	1.42591	1.34362	1.43842
Ryr3	3.95846	4.33931	4.34448	4.35052	3.84585	2.33727	1.46517	1.10476	1.69812	1.54392	1.12332	1.34509	1.10976	0.98333	1.06847	1.1594
Sfrp4	4.96839	4.67022	2.90539	2.75751	3.89206	3.97508	1.24427	1.04532	1.62093	1.20289	0.98333	1.05028	1.07917	0.98333	1.17469	1.03587
Gjc2	2.94817	3.04883	4.30477	4.51052	3.97669	4.37166	3.2952	1.95852	1.62093	2.51002	1.92226	1.29075	2.15922	2.11871	1.43196	1.82922
Cyp7b1	3.77263	3.70534	3.92292	3.87362	4.00149	3.87406	2.11398	1.71327	2.17393	1.6306	1.62529	1.91121	1.9887	1.76411	1.63168	1.49581
Nwd2	3.04257	3.71526	4.22901	3.82573	4.29024	4.03981	0.98333	1.10476	2.03208	1.29069	0.98333	0.98333	0.98333	0.98333	0.98333	0.98333
Zfp831	3.3537	3.73489	4.03637	3.67173	4.26705	4.06948	2.82225	1.82352	2.00195	2.54614	0.98333	1.05028	1.16904	1.42591	1.12256	1.00984
Slc14a1	2.26158	2.45579	4.89418	4.66817	5.11024	3.73695	1.6567	1.04532	0.98333	1.29069	0.98333	0.98333	1.10976	0.98333	1.04064	1.06143
Adam12	4.66432	4.4444	3.15656	3.07675	3.44211	4.33412	1.82575	1.59389	1.69812	1.81955	1.76011	2.54281	2.8077	2.98041	1.83975	2.42935
Ryr1	3.62178	4.19084	4.49909	4.59864	3.61738	2.55803	1.6567	1.36996	1.93975	1.52595	0.98333	1.05028	1.01599	0.98333	1.01227	0.98333
Sh3rf3	3.3537	3.54777	4.06438	3.7762	4.06338	4.2674	3.11112	1.59389	1.69812	2.01266	1.05502	0.98333	1.25364	1.42591	1.24953	1.03587
Grik4	2.5457	2.8106	4.53098	4.79792	4.4429	3.89999	1.97705	0.98333	2.2528	1.20289	1.05502	1.05028	0.98333	0.98333	0.98333	0.98333
9330182L06Rik	2.84715	3.28022	4.25007	4.31628	4.15149	4.16115	3.65079	2.63929	3.02622	2.51914	1.18853	1.17552	1.28078	1.29292	1.20007	1.43842
Slc16a7	3.23077	3.15466	4.22192	4.3335	3.86142	4.19446	3.17513	2.82746	2.91745	2.15981	1.5774	1.63409	2.28514	1.86126	1.65021	1.90179
Btbd11	3.18183	3.25325	4.05244	4.15124	4.16096	4.18846	1.6567	1.26965	1.21107	1.18008	1.25093	1.34509	1.93847	1.29292	1.24953	1.27319
Tvp23a	3.16514	3.3067	4.17129	4.00841	4.40622	3.90731	1.82575	1.32067	0.98333	0.98333	1.31073	1.34509	1.28078	0.98333	1.17469	1.206
Dclk3	2.82608	3.22576	4.2879	4.05069	4.21649	4.34764	0.98333	1.16184	1.8411	1.4893	0.98333	1.05028	1.01599	0.98333	0.98333	1.08656
Sarm1	3.21464	3.44424	3.92728	4.0297	4.02588	4.28156	0.98333	1.10476	0.98333	0.98333	1.18853	1.05028	1.1397	0.98333	1.14886	1.13553
Foxred2	2.88841	3.00099	4.30141	4.44863	4.22855	4.02978	1.24427	1.67456	1.21107	1.06029	1.18853	1.39746	1.57187	1.29292	1.20007	1.53284
Grin2d	2.94817	3.14001	4.0404	4.0297	4.26997	4.4134	1.82575	2.27544	1.15741	1.71236	1.36815	1.29075	1.40927	1.65994	1.34362	1.63855
Pkib	3.16514	3.29352	3.86494	4.11186	4.18899	4.21526	2.11398	1.63479	1.40771	1.10941	1.12332	1.11426	1.1978	1.14641	1.04064	1.13553
Nudt10	3.32394	3.40801	3.93597	3.9868	4.04985	4.1302	0.98333	1.16184	0.98333	0.98333	1.92226	2.14359	1.86865	2.26792	1.93351	1.95732
Xk	3.38287	3.4679	3.71648	4.00841	4.08343	4.17335	1.24427	1.26965	0.98333	1.66386	1.84346	1.87474	1.75715	2.0379	1.49483	1.91587
Arntl	3.24672	3.89179	4.09186	3.91996	4.13558	3.49599	1.97705	1.26965	0.98333	0.98333	2.85099	2.99767	2.15922	1.14641	2.39562	3.04371
Phgdh	3.02417	2.88277	4.11883	4.44863	3.99092	4.31498	1.46517	1.36996	2.30308	1.89152	1.12332	0.98333	1.1978	1.14641	1.12256	1.08656
Sytl2	3.07866	3.88301	4.00367	4.29884	3.84976	3.65233	0.98333	2.05208	0.98333	1.43254	1.18853	1.11426	1.1978	1.42591	1.32067	1.551
Nrip2	2.78297	2.79198	4.36071	4.7345	4.1766	3.91096	0.98333	0.98333	1.04372	1.00944	1.05502	0.98333	1.40927	1.42591	1.06847	1.06143
Pxylp1	3.42554	3.50267	3.88751	3.87362	4.11299	3.95402	2.90007	1.95852	2.37536	2.21695	1.52787	1.17552	2.02124	2.0379	1.68658	1.82922
Shd	3.00554	3.15466	4.14155	4.47991	4.13237	3.83236	1.24427	1.04532	1.77138	1.00944	0.98333	1.05028	1.33356	1.42591	1.22501	1.13553
Pcdh20	2.5457	3.00099	4.30477	4.49529	4.21649	4.16421	1.24427	2.4688	1.77138	2.56387	1.12332	1.11426	1.16904	1.65994	1.32067	1.45781
Ankrd35	3.91918	3.70534	3.81869	3.5591	3.97311	3.73695	2.35411	1.26965	1.58073	2.18294	1.80239	1.58976	1.25364	1.29292	1.55508	1.22875
Rpp25	2.51968	2.8106	4.2879	4.31628	4.11948	4.63025	0.98333	1.04532	0.98333	1.20289	1.05502	1.05028	1.25364	1.14641	1.12256	1.13553
NA	3.04257	3.29352	4.35748	4.09175	4.07678	3.82077	0.98333	1.10476	1.2628	1.03509	1.12332	1.05028	1.1397	1.42591	1.22501	1.1594
Camk1g	2.80468	3.53662	3.97022	3.72491	4.07344	4.56924	0.98333	0.98333	0.98333	0.98333	1.05502	1.11426	1.01599	0.98333	0.98333	0.98333
9330151L19Rik	3.43948	3.25325	4.08406	4.29884	3.90339	3.66965	2.9739	1.63479	3.155	2.68223	2.03293	1.67709	1.67773	1.14641	1.9183	1.67213
5330417C22Rik	3.02417	3.18352	4.30477	4.09175	4.09993	3.9146	3.04414	3.15722	3.70583	2.80657	0.98333	0.98333	0.98333	0.98333	0.98333	0.98333
Zfp692	3.11388	3.19774	4.90307	4.61281	3.98737	2.78168	1.82575	2.16808	1.2628	1.45171	2.87099	2.91026	2.40096	2.58479	2.24527	2.22957
Lypd6b	3.59711	3.12521	3.74148	3.91996	3.96232	4.2123	1.97705	1.8926	2.27816	1.54392	0.98333	0.98333	1.01599	0.98333	1.04064	0.98333
Cgref1	2.64534	2.84714	4.18594	4.09175	4.4273	4.32321	1.97705	1.26965	0.98333	1.00944	1.31073	1.75942	1.81398	1.95228	1.9183	1.92982
Zfp941	2.82608	3.29352	4.14155	4.3335	3.98737	3.92185	1.46517	1.59389	1.40771	1.24746	1.36815	1.05028	1.40927	1.14641	1.06847	1.08656
Nog	2.71579	3.00099	4.09962	4.41666	4.18281	4.07924	2.11398	3.29117	2.57272	2.96174	1.67165	2.01542	2.20242	2.11871	1.41038	2.22957
Irak1bp1	3.70496	3.77337	3.93163	3.91996	3.58023	3.55312	2.23904	1.16184	1.40771	1.13335	1.8834	1.71884	2.18817	2.52674	1.63168	1.70494
Htr1b	3.54646	3.86531	3.76606	3.80118	3.60356	3.8362	1.97705	1.26965	1.93975	1.56168	0.98333	0.98333	0.98333	0.98333	0.98333	1.06143
Abcc8	3.19833	3.29352	4.53671	4.13169	4.10321	3.12095	0.98333	0.98333	1.45295	0.98333	2.37861	2.71775	2.49663	2.46626	2.22068	2.22957
Ephb2	3.49396	3.66497	3.6227	3.94259	3.58493	4.05637	2.23904	1.36996	0.98333	1.29069	1.18853	0.98333	1.10976	0.98333	1.06847	1.27319
Nxph3	3.27811	3.11025	3.90974	3.67173	4.12272	4.2674	2.82225	1.59389	3.79637	1.84877	1.12332	0.98333	1.16904	1.14641	1.04064	1.13553
Hhip	4.99224	4.17656	2.94037	2.99252	3.23063	3.96459	4.14208	3.14311	2.14665	2.80657	0.98333	1.11426	0.98333	0.98333	0.98333	1.00984
Smarca1	3.89914	3.82923	3.97444	3.87362	3.41071	3.29293	0.98333	1.26965	0.98333	0.98333	1.52787	1.23429	1.38447	1.54767	1.32067	1.551
Hapln1	2.66921	2.98468	4.11883	4.31628	4.49373	3.67824	0.98333	1.75096	0.98333	1.26923	1.84346	2.20365	2.4733	2.11871	1.65021	2.18374
Il13ra2	4.62824	4.65999	2.7855	2.53736	3.44211	4.19745	1.97705	1.04532	0.98333	0.98333	1.42338	1.17552	1.30741	1.54767	1.17469	1.45781
Col26a1	4.14023	3.88301	3.57342	3.69857	3.19421	3.75736	0.98333	1.21675	1.49681	1.39341	0.98333	1.05028	1.1397	0.98333	0.98333	0.98333
Plxna3	3.32394	3.45612	4.16761	4.41666	3.83801	3.04331	2.9739	1.63479	1.2628	1.99969	1.36815	1.34509	1.28078	1.14641	1.34362	1.18289
Opn3	4.27856	3.6547	3.17869	3.37173	3.66695	4.08893	1.46517	1.92594	2.00195	1.83424	2.29225	2.14359	2.56444	2.58479	2.41742	2.35892
Wnk3	3.02417	3.34553	3.80927	3.91996	4.23752	3.89999	0.98333	0.98333	1.40771	0.98333	0.98333	1.05028	1.04793	0.98333	0.98333	0.98333
Pip5k1b	3.43948	3.77337	3.77577	3.82573	3.66695	3.73695	2.65276	1.82352	1.69812	1.41311	2.29225	2.34368	2.21654	1.95228	1.9782	2.28488
Hrasls	2.5457	2.98468	4.22547	3.84987	4.37944	4.20638	0.98333	0.98333	0.98333	1.00944	2.06801	2.34368	2.56444	2.98041	2.29322	1.82922
Gal3st3	3.3389	3.55882	3.59004	3.75079	4.00149	3.94338	0.98333	1.04532	0.98333	1.13335	1.18853	1.71884	2.05306	2.19524	1.66851	1.39886
Gm5124	2.38202	2.79198	4.04844	4.18958	4.20434	4.50795	0.98333	1.59389	2.27816	1.08506	1.92226	1.87474	1.65717	1.65994	1.65021	1.41877
AI504432	3.13117	3.16916	3.99122	4.24525	3.84193	3.74106	2.35411	1.99039	2.7463	1.57922	1.12332	0.98333	1.25364	1.14641	1.12256	1.29491
Rad54b	4.27078	4.84751	3.70126	3.64439	2.66559	2.98914	0.98333	1.26965	0.98333	2.02551	1.25093	1.67709	1.33356	2.0379	1.01227	1.75281
Olfml1	4.80023	4.3959	2.96605	3.19455	3.25441	3.50083	0.98333	1.32067	1.2628	1.57922	1.05502	1.44799	1.50442	1.76411	1.47417	1.29491
Snai1	4.71106	3.94332	3.10354	2.99252	3.50293	3.85147	3.2952	2.4688	1.53938	2.40574	2.26227	1.79889	2.0842	2.19524	1.83975	1.60416
Crtam	2.59638	2.91755	4.08406	4.07137	4.34386	4.05966	2.35411	0.98333	1.77138	1.15691	0.98333	0.98333	0.98333	0.98333	0.98333	1.13553
Hsf4	3.06073	3.04883	4.07229	4.20838	3.99445	3.68251	1.24427	2.37536	3.37074	3.27326	1.31073	1.63409	1.75715	1.14641	1.65021	1.43842
Col11a2	2.49318	3.16916	4.59274	4.55525	4.02933	3.18862	3.69513	1.04532	2.11885	2.18294	1.9601	1.98151	1.50442	1.29292	1.41038	1.58666
Serpina1b	4.36148	3.64436	2.56793	2.75751	3.90714	4.78534	1.46517	0.98333	0.98333	1.80472	2.4601	2.67596	2.24438	2.89121	1.87168	2.76899
Shisa3	4.80563	3.63394	3.17135	3.15634	3.51774	3.71208	0.98333	0.98333	1.2628	0.98333	0.98333	1.44799	1.33356	1.42591	1.24953	1.00984
Ttc8	4.14023	3.43226	3.99538	3.37173	3.8142	3.19462	0.98333	1.63479	0.98333	0.98333	2.78926	2.1126	2.33777	2.33711	2.60009	2.26301
Klhl32	2.66921	3.11025	4.05244	4.2812	4.27579	3.54375	1.24427	1.16184	1.45295	1.24746	1.31073	1.44799	1.25364	1.65994	1.57461	1.18289
Flrt1	3.70496	3.70534	3.46951	3.52952	3.58961	3.92906	0.98333	0.98333	1.10169	0.98333	1.12332	1.05028	1.10976	1.14641	1.06847	1.03587
P2ry14	3.29355	2.5695	4.42385	4.70833	3.95509	2.96828	1.97705	1.92594	3.05585	1.99969	1.18853	1.23429	1.30741	1.29292	1.14886	1.1594
Glt1d1	2.62107	2.95151	4.10733	4.11186	4.07344	4.0163	1.46517	1.21675	1.93975	1.33266	0.98333	0.98333	0.98333	0.98333	0.98333	0.98333
Kcnk5	4.99697	3.70534	2.54539	3.19455	3.12496	4.28999	2.35411	3.05545	1.2628	1.71236	2.43345	1.87474	2.24438	2.33711	2.14429	2.12433
6430571L13Rik	3.58461	3.16916	3.842	3.4047	3.95509	3.87032	1.6567	1.04532	1.93975	2.17142	1.80239	1.44799	1.38447	1.54767	1.29734	1.31631
B3gnt9	3.7392	3.54777	3.46951	3.72491	3.53241	3.76544	1.97705	2.19567	1.69812	1.24746	2.1684	1.94679	2.17376	2.52674	1.77367	2.27399
Scn3a	2.64534	3.15466	4.45139	4.3335	3.92947	3.25326	2.35411	1.99039	2.11885	2.18294	1.42338	1.44799	1.77635	1.95228	1.32067	1.68863
Rab36	3.23077	3.2668	3.98704	3.84987	3.98737	3.43143	1.97705	1.75096	2.42161	1.61367	1.31073	1.39746	1.07917	1.14641	1.14886	1.1594
Plxnb3	2.94817	3.29352	4.42385	4.26334	3.66695	3.13349	1.46517	1.26965	0.98333	1.15691	1.25093	1.23429	1.30741	1.14641	1.09577	1.35817
Fkbp1b	3.02417	3.22576	3.86948	3.5591	3.93683	4.05307	0.98333	2.30107	1.31274	1.80472	2.10226	2.37013	2.18817	2.26792	2.04974	2.13641
Inha	3.07866	3.18352	4.45442	4.05069	3.84585	3.04331	0.98333	1.26965	0.98333	0.98333	1.31073	1.67709	1.25364	1.29292	1.41038	1.27319
Rec8	2.84715	3.16916	4.47841	4.20838	3.58493	3.36384	2.23904	1.75096	1.93975	2.59869	1.25093	1.39746	1.40927	1.95228	1.22501	1.27319
Zscan18	3.04257	2.96819	4.10733	3.9868	3.87299	3.64359	0.98333	1.63479	0.98333	1.24746	1.12332	1.54404	1.50442	1.54767	1.45322	1.551
Tox	2.78297	2.93463	3.94461	3.89698	4.18591	3.86281	1.97705	2.05208	2.37536	2.2057	1.05502	1.11426	1.52725	1.54767	1.24953	1.27319
Cilp2	3.63396	3.35825	3.74643	3.30345	3.1378	4.42365	0.98333	1.16184	1.49681	1.47063	1.25093	1.11426	1.30741	1.54767	1.61291	1.37866
Slc22a4	3.6095	3.85637	3.57898	3.5881	3.59427	3.36915	1.6567	0.98333	1.04372	1.31182	1.52787	1.44799	1.48121	1.29292	1.49483	1.47693
Prr36	2.32306	2.77311	4.06438	4.09175	4.02242	4.31498	3.35169	2.02156	2.63293	2.51914	1.05502	1.11426	1.01599	0.98333	1.01227	1.00984
Cox6b2	4.73388	3.91779	3.11124	2.90306	3.31785	3.55778	1.46517	1.75096	3.01117	1.81955	1.52787	1.29075	1.698	1.14641	1.14886	1.31631
Nat8f1	3.7945	3.52539	3.79022	3.15634	3.46777	3.76544	1.82575	1.21675	2.48832	1.37344	1.52787	1.29075	1.43365	1.54767	1.38847	1.43842
Rimkla	2.51968	2.8106	4.17497	3.82573	4.26705	3.80909	1.82575	0.98333	0.98333	0.98333	1.05502	1.11426	1.1397	0.98333	1.12256	1.11125
Myl6b	2.82608	3.04883	3.67555	3.7762	4.25825	3.78545	0.98333	1.10476	1.87474	1.03509	1.25093	1.29075	1.28078	1.29292	1.29734	1.08656
Tmem132d	2.80468	3.11025	3.80453	3.5591	3.89962	4.11763	2.65276	2.08197	3.43979	3.06494	0.98333	0.98333	0.98333	0.98333	0.98333	0.98333
Dlk2	2.73853	2.96819	4.00367	4.17054	3.84193	3.55312	0.98333	0.98333	0.98333	0.98333	1.52787	1.63409	1.67773	1.95228	2.00725	1.78386
Ankrd42	2.86793	2.91755	3.86948	4.0297	3.66251	3.91823	1.46517	3.2123	2.00195	2.78406	1.05502	1.63409	1.92133	1.54767	1.55508	1.82922
Wdr54	3.32394	2.90027	3.77092	3.64439	3.92577	3.69948	1.6567	1.46374	1.87474	1.4893	1.52787	1.23429	1.25364	1.14641	1.61291	1.18289
Lypd6	3.3389	3.16916	3.74643	3.37173	4.16096	3.4715	0.98333	1.16184	0.98333	1.00944	1.05502	1.11426	1.40927	1.86126	1.29734	1.43842
Etnk2	4.33933	3.72511	3.5224	3.07675	3.3122	3.28171	0.98333	1.41761	0.98333	1.33266	1.18853	1.58976	1.45763	1.42591	1.36622	1.60416
Prrx2	4.52083	3.95174	3.08803	2.75751	3.45756	3.4715	1.46517	1.04532	0.98333	1.13335	1.05502	0.98333	1.07917	0.98333	0.98333	1.03587
Fras1	3.29355	3.82007	3.80927	3.61652	3.60356	3.08911	2.55992	1.8926	2.00195	2.82874	1.05502	1.17552	1.1978	0.98333	1.17469	1.206
Traip	2.49318	2.91755	4.25702	4.38397	3.97311	3.17048	2.23904	1.26965	1.80666	1.84877	2.32161	2.56587	2.46149	2.52674	1.66851	2.30643
Rhpn1	3.77263	3.22576	3.7806	3.46846	3.62652	3.28733	1.46517	1.36996	1.45295	1.86316	1.25093	1.05028	1.1397	1.54767	1.14886	1.06143
Vps37d	2.49318	2.65442	4.06041	3.69857	4.20128	4.04977	3.04414	1.7877	2.50988	3.35699	1.36815	1.75942	1.61515	1.76411	1.72205	1.85869
Tenm3	2.59638	2.75399	4.01602	4.13169	4.11299	3.53433	1.82575	1.41761	0.98333	2.02551	1.36815	1.17552	1.50442	1.42591	1.47417	1.56894
Fam229b	3.23077	2.90027	3.79022	3.82573	3.56129	3.813	1.24427	1.41761	0.98333	0.98333	1.52787	1.54404	1.77635	1.76411	1.45322	1.49581
Kcng1	2.32306	2.8106	3.82806	3.9868	4.04985	4.04314	1.6567	1.32067	0.98333	1.69637	0.98333	0.98333	0.98333	0.98333	0.98333	1.00984
Shisa8	2.29265	2.27986	4.16391	4.07137	3.94781	4.2674	1.97705	0.98333	1.04372	1.00944	0.98333	0.98333	1.04793	0.98333	1.01227	0.98333
Ano4	2.94817	3.09514	4.12644	4.20838	3.61738	2.91115	0.98333	0.98333	0.98333	0.98333	1.42338	1.54404	1.40927	1.65994	1.22501	1.31631
Kcnj12	2.98667	3.49117	3.68589	3.4047	3.6536	3.66965	1.82575	1.32067	2.46642	2.54614	2.03293	2.04854	1.9554	1.95228	2.06364	1.81426
Car12	2.19737	2.79198	4.10348	4.24525	3.73191	3.77347	0.98333	1.16184	1.45295	1.33266	1.05502	1.17552	1.04793	0.98333	0.98333	1.03587
Vps51	2.84715	3.09514	3.9403	4.07137	3.51282	3.35316	2.23904	1.59389	1.77138	1.06029	1.67165	1.87474	1.25364	1.42591	1.51519	1.31631
Flywch2	3.07866	3.07987	3.5453	3.5591	3.83407	3.69948	1.97705	1.21675	0.98333	0.98333	1.42338	1.98151	1.63631	1.29292	1.57461	1.45781
Pfkfb4	3.18183	3.25325	3.92728	3.69857	3.77775	2.91842	2.74	3.31653	1.58073	2.17142	1.47657	1.75942	1.67773	1.42591	1.65021	1.551
Kcna4	2.57126	2.96819	3.81399	3.7762	3.55173	4.02978	0.98333	0.98333	0.98333	0.98333	1.12332	0.98333	1.30741	1.14641	1.06847	1.06143
Trhde	2.69269	3.18352	3.68589	3.80118	3.48294	3.85904	0.98333	0.98333	0.98333	0.98333	1.05502	1.05028	1.04793	1.14641	1.01227	1.00984
Slitrk2	2.59638	2.75399	4.11501	3.84987	4.21346	3.10193	0.98333	0.98333	0.98333	0.98333	1.12332	1.05028	1.38447	1.14641	1.04064	1.47693
Hmgcll1	3.06073	2.67489	3.85122	3.91996	3.83801	3.23591	2.11398	1.71327	0.98333	1.81955	1.12332	1.23429	1.43365	1.54767	1.51519	1.78386
Adgrv1	4.59747	4.34571	2.57907	2.53736	2.98273	3.50567	1.6567	1.16184	0.98333	1.24746	0.98333	1.11426	1.10976	0.98333	1.01227	1.06143
Kif17	2.84715	3.21182	3.82806	3.87362	3.61279	3.05655	0.98333	0.98333	1.53938	0.98333	0.98333	0.98333	1.01599	0.98333	1.09577	1.06143
Ptprn2	3.46698	3.84738	3.30482	2.94848	3.37862	3.46158	0.98333	0.98333	0.98333	0.98333	0.98333	0.98333	0.98333	0.98333	1.01227	1.03587
Grhl1	3.04257	2.73462	3.76606	4.05069	3.61279	3.18862	3.04414	2.24934	3.07044	3.23504	1.05502	1.11426	1.16904	0.98333	1.17469	1.27319
Rasl10a	2.19737	2.91755	3.69616	3.49931	4.19208	3.87032	1.24427	1.41761	1.80666	1.61367	1.36815	1.58976	1.43365	1.65994	1.68658	1.31631
Fcrls	2.29265	2.63365	3.90089	4.07137	3.48294	3.96459	2.90007	1.5518	2.0905	1.45171	1.67165	1.83731	1.83243	2.11871	1.55508	1.63855
Otud7a	2.46618	2.98468	3.67555	3.52952	3.84976	3.80909	1.6567	1.16184	0.98333	1.47063	0.98333	0.98333	1.10976	0.98333	0.98333	0.98333
Ikzf4	2.84715	3.37085	3.57898	3.5881	3.6356	3.2704	2.35411	1.32067	2.03208	2.43494	1.47657	1.58976	1.57187	0.98333	1.88739	1.81426
Pacrg	2.38202	2.40767	3.88751	4.15124	3.74035	3.71626	1.24427	1.21675	1.62093	1.08506	1.05502	0.98333	1.04793	1.14641	1.12256	1.08656
Entpd3	3.06073	2.71498	3.60646	3.52952	3.62652	3.73695	1.24427	1.59389	1.40771	1.33266	0.98333	0.98333	0.98333	0.98333	0.98333	0.98333
Chst8	2.38202	2.77311	3.80927	3.67173	3.79407	3.8362	3.65079	1.46374	1.8411	2.07581	0.98333	0.98333	0.98333	0.98333	0.98333	1.06143
Zfp286	2.82608	2.8106	3.94461	3.87362	3.37862	3.42634	2.46068	1.75096	2.81722	1.57922	1.67165	1.54404	1.85066	1.86126	1.61291	2.11214
Eomes	2.51968	2.8106	3.69616	3.61652	3.72767	3.8778	1.46517	1.10476	2.2007	1.77458	1.05502	1.05028	0.98333	0.98333	1.01227	1.03587
Mttp	3.14825	2.8106	3.70635	3.5881	3.60356	3.32609	1.82575	1.5518	1.77138	1.61367	1.80239	1.98151	2.0842	1.76411	1.87168	1.94364
Ccdc148	3.04257	2.5695	3.81869	3.52952	3.74035	3.47643	1.46517	1.21675	0.98333	1.56168	1.31073	1.17552	1.35924	1.29292	1.43196	1.49581
Ccdc30	3.16514	2.63365	3.79022	3.91996	3.30652	3.30407	1.24427	2.08197	1.2628	1.41311	1.12332	1.17552	1.16904	1.14641	1.14886	1.00984
Anxa8	4.47417	3.62345	2.70643	3.1171	2.62968	3.56243	1.46517	2.61905	2.81722	1.78973	2.20038	1.54404	1.97215	1.95228	1.47417	1.85869
Slc29a2	2.43867	3.03306	3.76117	3.5591	3.85754	3.43143	1.82575	1.46374	0.98333	1.24746	2.13571	2.42161	2.00506	2.33711	1.65021	1.81426
Gpr173	2.76092	3.00099	3.47548	3.61652	3.64912	3.54844	1.24427	1.36996	1.62093	1.24746	1.31073	1.23429	1.1978	1.14641	1.27363	1.27319
Rab37	2.32306	2.71498	3.91854	3.96487	3.69763	3.41611	1.24427	1.10476	0.98333	0.98333	1.5774	1.23429	1.35924	1.14641	1.38847	1.39886
Lacc1	3.85819	3.43226	2.77585	3.46846	3.20645	3.28733	1.97705	1.50844	1.53938	1.39341	1.80239	1.75942	1.65717	2.19524	1.53527	1.67213
2019-03-04	2.76092	3.2668	3.35753	3.46846	3.50293	3.66102	2.23904	1.95852	2.11885	2.06339	0.98333	0.98333	0.98333	0.98333	0.98333	0.98333
Cdhr1	2.88841	2.75399	3.74643	3.5591	3.40541	3.63479	0.98333	0.98333	1.04372	1.29069	1.05502	1.23429	1.35924	1.42591	1.63168	1.90179
Lrp1b	3.09638	3.77337	3.53961	3.72491	3.18805	2.6128	0.98333	0.98333	0.98333	0.98333	0.98333	1.05028	0.98333	0.98333	1.06847	0.98333
Acss3	4.34675	3.81085	2.9317	2.90306	2.84074	3.09553	2.23904	1.7877	2.72801	2.64106	1.36815	1.11426	1.1978	1.29292	1.14886	1.33739
Fam222a	2.29265	3.15466	3.63343	3.4047	3.57552	3.84003	2.11398	1.41761	1.8411	1.78973	1.42338	1.29075	1.54974	1.14641	1.63168	1.63855
Satb2	2.76092	3.4679	3.50498	3.03525	3.4779	3.64359	0.98333	2.05208	0.98333	1.20289	1.52787	1.58976	1.48121	1.42591	1.57461	1.79914
Chadl	2.92852	2.82898	3.56784	3.64439	3.51282	3.39543	2.46068	1.36996	1.21107	1.24746	1.36815	1.67709	1.61515	1.29292	1.57461	1.43842
Wdr86	4.15721	3.64436	3.02426	3.23177	2.76826	3.02996	1.24427	1.10476	0.98333	1.00944	0.98333	1.17552	1.16904	0.98333	1.12256	1.06143
Rasgef1c	2.41062	2.61258	3.83272	3.87362	3.51282	3.55312	0.98333	0.98333	0.98333	1.00944	0.98333	1.05028	1.04793	0.98333	1.01227	1.08656
Zc3h12b	2.76092	3.25325	3.35753	3.43693	3.3732	3.59906	1.24427	1.85847	2.00195	1.26923	1.42338	1.34509	1.65717	1.42591	1.38847	1.43842
Gca	3.36836	3.29352	3.38317	3.61652	3.36776	2.74945	2.23904	1.8926	1.58073	2.21695	1.9601	1.87474	1.83243	2.11871	1.79047	1.76842
Sat2	3.43948	2.91755	3.60101	3.26805	3.24257	3.30407	2.23904	1.16184	0.98333	1.68021	1.36815	1.17552	2.0842	2.40313	1.70442	1.45781
Prkn	2.29265	2.61258	3.66513	4.0297	3.96953	3.19462	1.46517	1.67456	0.98333	1.47063	1.62529	1.94679	2.15922	1.95228	1.53527	1.98431
Rnf32	2.59638	2.67489	3.79022	4.05069	3.67137	2.96828	1.6567	1.10476	2.72801	2.28267	1.25093	1.34509	1.1397	1.14641	1.22501	1.206
Slc2a6	2.51968	2.54746	3.97022	3.69857	3.69328	3.25899	2.90007	1.46374	1.40771	1.00944	1.31073	1.11426	1.28078	0.98333	1.06847	1.03587
Siglech	2.09535	2.5695	3.75627	3.80118	3.61279	3.77748	2.23904	1.41761	2.63293	2.36587	0.98333	1.05028	1.10976	0.98333	0.98333	1.03587
Gabrg3	2.26158	2.77311	3.83272	3.61652	3.54692	3.57627	0.98333	0.98333	0.98333	0.98333	0.98333	0.98333	1.01599	0.98333	1.01227	0.98333
Fmn1	4.08807	3.62345	2.90539	3.33799	2.98983	2.63943	1.82575	1.67456	2.03208	1.9866	1.36815	1.17552	1.22599	1.29292	1.24953	1.18289
Fzd9	3.6699	2.45579	3.29134	3.52952	3.55173	3.04994	2.11398	1.16184	0.98333	0.98333	1.25093	1.05028	1.30741	1.42591	1.24953	1.25114
Sox6	2.26158	2.19735	3.97444	3.82573	4.08011	3.20059	1.97705	1.75096	1.361	1.99969	1.5774	2.01542	2.24438	1.86126	1.8558	2.07497
Aspg	4.0431	2.98468	3.186	3.03525	3.3122	2.97527	3.55782	1.32067	1.58073	1.41311	1.25093	1.17552	1.01599	0.98333	1.14886	0.98333
Paqr6	3.04257	2.86506	3.40837	3.4047	3.6356	3.15825	0.98333	1.10476	1.8411	1.83424	1.05502	1.11426	1.16904	1.42591	1.06847	1.03587
Mmp16	3.23077	3.2668	3.04047	2.99252	3.33468	3.64796	1.82575	1.63479	2.30308	2.76885	0.98333	0.98333	1.01599	1.14641	1.04064	1.08656
Hcn4	2.05967	2.5695	3.71142	3.87362	3.58961	3.7079	1.46517	1.46374	0.98333	0.98333	1.71655	1.63409	1.81398	1.54767	1.66851	1.37866
Foxo6	2.26158	2.43193	3.64407	3.5591	3.71915	3.89263	2.23904	2.69836	2.59307	2.1481	1.18853	1.39746	1.43365	1.29292	1.27363	1.49581
2810459M11Rik	1.78169	2.52508	3.99538	4.17054	4.12272	2.90385	1.46517	1.04532	2.11885	1.31182	1.18853	0.98333	1.01599	0.98333	0.98333	0.98333
Plch1	2.19737	2.93463	3.75136	3.61652	3.45756	3.52007	0.98333	1.82352	1.58073	0.98333	0.98333	1.05028	0.98333	1.14641	0.98333	0.98333
Slit1	2.22983	2.79198	3.93597	3.46846	3.68017	3.33155	0.98333	1.04532	0.98333	0.98333	0.98333	0.98333	1.01599	0.98333	1.01227	1.00984
Lrfn3	2.29265	3.18352	3.59553	3.19455	3.80216	3.30407	1.46517	2.19567	1.97119	1.33266	1.84346	1.54404	1.85066	1.95228	2.20822	2.02386
Sox21	2.02309	2.86506	3.70126	3.61652	4.3494	2.81321	1.46517	1.50844	0.98333	0.98333	1.12332	1.05028	1.04793	0.98333	1.01227	1.00984
Ccdc74a	2.62107	2.43193	3.77577	3.89698	3.74035	2.89651	1.97705	1.10476	1.361	1.35319	0.98333	1.05028	0.98333	1.14641	1.06847	1.00984
Lrrc75b	2.59638	2.95151	3.38952	3.7762	3.57552	3.04994	1.46517	1.5518	1.93975	1.50774	0.98333	1.05028	1.38447	1.29292	1.17469	1.13553
Nos1ap	3.02417	3.54777	3.22906	3.19455	3.21254	3.12095	2.55992	1.41761	3.19549	2.40574	1.18853	0.98333	1.33356	1.14641	1.12256	1.39886
Gstm6	3.27811	2.95151	3.11124	2.70554	3.50293	3.74923	0.98333	1.71327	0.98333	0.98333	1.18853	1.44799	1.40927	1.29292	1.24953	1.22875
Hs3st3a1	4.09689	3.6853	2.64416	2.53736	3.13139	3.19462	0.98333	1.50844	0.98333	1.35319	1.05502	1.11426	1.1397	1.65994	1.09577	1.39886
P2ry12	2.26158	2.73462	3.66513	3.64439	3.48294	3.46655	0.98333	0.98333	1.69812	0.98333	1.18853	1.11426	1.07917	0.98333	1.01227	1.11125
Gm973	2.86793	2.50235	3.81869	3.69857	3.45756	2.85924	1.46517	1.95852	2.69073	1.81955	0.98333	0.98333	0.98333	0.98333	1.01227	0.98333
Epha3	3.48053	3.5698	3.04047	3.03525	3.10548	2.95421	2.46068	1.21675	1.2628	1.41311	0.98333	0.98333	1.10976	0.98333	1.04064	1.11125
Colca2	3.43948	3.80157	2.96605	2.94848	2.80092	3.22423	1.97705	1.50844	2.27816	1.13335	1.05502	0.98333	1.25364	1.54767	1.22501	1.206
Pld5	2.35284	2.96819	3.42699	3.30345	3.58023	3.46158	1.97705	1.04532	0.98333	1.13335	1.31073	1.39746	1.43365	0.98333	1.29734	1.62146
Rhov	2.09535	2.1396	3.61189	3.5881	4.06338	3.57627	1.97705	1.67456	2.83441	1.72817	0.98333	1.05028	0.98333	0.98333	0.98333	1.00984
Hectd2	2.57126	2.79198	3.55097	3.89698	3.41071	2.83641	0.98333	1.36996	0.98333	0.98333	2.26227	1.83731	2.33777	1.54767	2.00725	2.26301
Smim10l2a	2.59638	2.40767	3.48736	3.26805	3.58023	3.71208	1.24427	1.10476	1.62093	1.56168	1.05502	1.05028	1.04793	0.98333	0.98333	1.06143
Arhgef19	2.86793	2.43193	3.5339	3.49931	4.02588	2.68274	3.23641	1.7877	2.2528	1.74381	1.76011	1.39746	1.10976	1.29292	1.9928	1.29491
Clec11a	3.83727	3.19774	3.01609	2.20443	3.112	3.62149	0.98333	1.7877	0.98333	1.29069	1.18853	1.11426	1.25364	0.98333	1.22501	1.18289
Sema5b	1.90743	2.5695	3.73651	3.75079	3.37862	3.64359	0.98333	0.98333	0.98333	1.06029	1.05502	1.23429	1.1978	1.54767	1.20007	1.22875
Ydjc	2.26158	2.65442	3.44536	3.7762	3.56605	3.2704	2.11398	2.08197	2.35167	1.83424	1.42338	1.54404	1.67773	1.29292	1.70442	1.551
Zfp811	2.5457	2.67489	3.60101	3.69857	3.2951	3.12723	0.98333	1.32067	1.40771	1.66386	1.31073	1.11426	1.22599	0.98333	1.06847	1.13553
Cited1	3.07866	2.25288	2.92299	3.19455	3.66251	3.77347	2.11398	1.10476	1.87474	2.26109	1.05502	0.98333	0.98333	1.14641	1.04064	1.06143
Ttll3	2.64534	2.40767	3.97866	4.09175	3.33468	2.42151	2.46068	1.92594	2.94937	2.45408	1.18853	1.44799	1.01599	1.14641	1.36622	1.11125
Nphp4	2.94817	2.69508	3.71648	3.64439	3.50293	2.36944	0.98333	1.5518	1.04372	1.08506	2.06801	1.34509	1.48121	0.98333	1.22501	1.551
Ngfr	3.42554	3.22576	2.86955	2.80768	2.87948	3.66102	1.24427	1.21675	0.98333	1.15691	0.98333	0.98333	1.07917	1.14641	1.06847	1.08656
Ngb	3.11388	2.65442	3.03239	3.15634	3.57079	3.33155	2.46068	1.67456	3.63889	2.28267	0.98333	1.05028	0.98333	1.14641	1.06847	1.00984
Sowahb	2.62107	3.35825	3.04047	3.33799	3.20645	3.28733	2.46068	1.5518	1.93975	2.48232	0.98333	0.98333	0.98333	0.98333	0.98333	0.98333
Mchr1	2.57126	2.47926	3.46951	3.37173	3.41071	3.53905	1.24427	2.22275	2.22699	1.33266	0.98333	1.05028	1.01599	0.98333	1.14886	0.98333
Chrdl1	2.26158	2.63365	3.33799	3.64439	3.68456	3.2704	1.24427	1.85847	1.80666	1.15691	1.18853	1.11426	1.43365	1.54767	1.24953	1.37866
Pm20d1	3.54646	2.93463	2.71656	2.70554	3.65806	3.23591	1.24427	1.21675	1.40771	0.98333	1.76011	1.11426	1.83243	1.54767	1.70442	1.45781
Tmem45a	4.18231	3.83834	2.43936	2.12752	2.71784	3.4566	1.97705	3.09995	1.58073	1.50774	1.05502	1.58976	1.90398	2.26792	1.61291	1.70494
Ypel1	2.43867	2.88277	3.5339	3.4047	3.45243	3.04331	2.11398	1.32067	2.32758	1.9055	1.5774	1.91121	2.02124	1.14641	1.47417	1.70494
Ankrd55	2.82608	2.82898	3.14161	3.37173	3.28359	3.23591	1.6567	1.10476	1.361	1.18008	1.05502	1.05028	1.16904	1.14641	1.14886	1.11125
9530077C05Rik	3.21464	2.8106	3.33799	3.07675	3.42126	2.81321	0.98333	1.59389	0.98333	1.06029	1.52787	1.44799	1.35924	1.54767	1.34362	1.53284
Arhgef33	2.29265	2.88277	3.44536	3.1171	3.44728	3.46655	0.98333	1.16184	2.00195	0.98333	0.98333	1.11426	1.1397	0.98333	1.06847	0.98333
Vwc2	3.4533	2.3579	2.96605	3.33799	3.3732	3.13972	0.98333	1.26965	0.98333	0.98333	1.05502	1.63409	2.18817	1.86126	1.01227	1.49581
Pls1	2.73853	2.91755	3.37681	3.19455	3.22462	3.17048	1.82575	2.16808	2.63293	1.83424	0.98333	0.98333	1.04793	0.98333	0.98333	1.03587
Kcnd1	2.43867	2.63365	3.37041	3.43693	3.55173	3.13972	3.35169	1.10476	2.32758	2.08811	1.05502	1.05028	1.1978	0.98333	1.12256	1.06143
Nme5	2.16415	2.383	3.34453	3.61652	3.32348	3.69948	1.82575	1.7877	1.15741	1.29069	1.25093	1.17552	1.25364	1.54767	1.12256	1.22875
Col9a3	2.16415	2.67489	3.87401	3.75079	3.11849	2.94	0.98333	1.10476	0.98333	1.10941	1.05502	1.05028	1.16904	0.98333	0.98333	0.98333
Grem1	3.84777	3.82007	2.46361	2.27745	3.23661	2.87426	2.46068	1.04532	1.53938	0.98333	0.98333	0.98333	0.98333	0.98333	0.98333	0.98333
Rnf180	1.86672	2.3579	3.50498	4.11186	3.64012	3.02323	1.24427	1.21675	1.49681	0.98333	1.12332	1.11426	1.04793	1.14641	1.04064	1.08656
A930033H14Rik	3.3389	3.2668	3.08803	2.99252	2.22278	3.46655	0.98333	1.36996	0.98333	1.08506	1.67165	1.63409	1.90398	2.11871	1.55508	1.76842
Shox2	2.09535	2.19735	3.15656	3.33799	3.80216	3.78545	1.24427	1.10476	0.98333	0.98333	1.05502	1.05028	1.10976	0.98333	1.24953	1.06143
Rnf43	3.7392	3.25325	2.62279	2.65163	2.75165	3.34239	2.65276	1.92594	2.63293	2.15981	0.98333	0.98333	1.10976	0.98333	1.01227	1.03587
B3gat2	2.32306	2.73462	3.08803	3.46846	3.42126	3.28171	0.98333	1.67456	0.98333	1.15691	1.67165	1.54404	1.22599	0.98333	1.36622	1.22875
Tmem117	3.6095	3.00099	2.73659	2.99252	2.86411	3.1083	1.46517	1.41761	0.98333	1.26923	1.47657	1.58976	1.97215	1.86126	1.79047	1.70494
Trim67	2.43867	2.93463	3.39583	3.19455	3.11849	3.19462	1.6567	1.10476	2.96507	1.29069	1.05502	1.17552	1.07917	0.98333	1.36622	1.06143
NA	2.19737	1.98423	4.19321	4.20838	3.28936	2.4009	0.98333	1.50844	1.77138	1.45171	1.18853	1.54404	1.16904	1.29292	1.20007	1.37866
AA414768	3.06073	2.86506	2.95754	2.90306	3.07242	3.39021	1.6567	2.24934	0.98333	1.08506	1.18853	1.67709	1.71799	1.65994	1.94856	1.91587
Dpyd	3.93895	3.11025	2.84207	2.53736	2.87948	2.94	0.98333	1.67456	1.90761	1.41311	1.52787	1.67709	1.698	1.65994	1.79047	1.67213
Zfp454	2.64534	2.73462	3.21485	3.15634	3.23063	3.25326	0.98333	1.99039	2.50988	1.15691	1.31073	1.58976	1.35924	1.42591	1.57461	1.43842
NA	1.98556	2.10984	4.16021	4.41666	3.2778	2.2707	0.98333	0.98333	0.98333	1.22535	1.18853	1.49681	1.45763	1.54767	1.20007	1.31631
Cited4	3.4533	3.01712	2.91422	2.47664	3.17565	3.17048	0.98333	1.36996	0.98333	1.59655	1.36815	1.54404	1.698	1.54767	1.79047	1.49581
Hrh1	1.98556	2.33235	3.26399	3.4047	3.76539	3.41611	1.46517	1.41761	1.53938	1.10941	0.98333	1.11426	1.01599	1.29292	1.17469	1.08656
Ccdc39	2.69269	2.3579	3.91415	3.61652	3.34579	2.22455	2.74	1.7877	1.73521	1.52595	1.05502	1.17552	1.1978	1.29292	1.14886	1.1594
Pfn4	2.16415	2.50235	3.31818	3.46846	3.22462	3.4715	0.98333	0.98333	1.2628	1.26923	1.25093	1.29075	1.35924	0.98333	1.36622	1.11125
Slc46a1	2.92852	2.73462	2.79508	3.1171	3.27199	3.29851	2.11398	1.21675	2.2528	2.01266	1.36815	1.49681	1.50442	0.98333	1.57461	1.25114
Relt	2.73853	2.50235	3.04047	2.94848	3.51774	3.34778	1.82575	1.63479	1.45295	1.47063	1.18853	1.39746	1.28078	1.76411	1.12256	1.18289
Ptger3	3.8267	2.86506	2.77585	2.34694	2.83286	3.4365	2.90007	1.7877	0.98333	1.47063	0.98333	1.05028	1.01599	0.98333	0.98333	1.11125
Pnpla3	2.19737	2.45579	3.92728	4.05069	3.32348	2.12757	2.11398	1.26965	1.31274	0.98333	1.12332	1.05028	1.10976	0.98333	1.06847	1.00984
Acvr1c	2.02309	2.82898	3.45144	3.4047	3.3732	2.98914	0.98333	1.16184	1.77138	1.26923	1.05502	0.98333	1.1397	0.98333	1.06847	0.98333
Vstm5	2.49318	2.40767	3.45749	3.19455	3.34024	3.17048	0.98333	1.26965	1.2628	1.13335	2.06801	2.17393	1.9554	2.11871	1.45322	2.18374
AW551984	2.05967	2.30634	3.34453	3.5591	3.31785	3.4365	0.98333	0.98333	0.98333	0.98333	0.98333	1.05028	1.04793	0.98333	0.98333	1.03587
Col11a1	3.30882	2.8106	3.21485	3.46846	2.82494	2.38	2.23904	0.98333	0.98333	0.98333	1.25093	0.98333	1.01599	0.98333	1.01227	0.98333
Ebf4	2.98667	2.40767	3.31152	3.33799	3.27199	2.65691	1.82575	1.5518	1.8411	1.4893	1.52787	1.67709	1.54974	1.65994	1.43196	1.58666
Gsdme	2.94817	3.03306	3.08021	3.15634	2.95398	2.78963	1.24427	1.21675	0.98333	1.10941	1.05502	1.11426	1.1397	1.29292	1.14886	0.98333
Hebp2	2.96755	2.71498	2.8046	2.80768	3.12496	3.53905	1.6567	1.10476	2.0905	1.56168	1.18853	1.63409	1.698	1.76411	1.12256	1.31631
Atp13a4	2.32306	2.47926	3.61731	3.52952	3.33468	2.6128	1.97705	1.21675	0.98333	1.66386	0.98333	0.98333	0.98333	1.14641	0.98333	0.98333
NA	2.43867	2.52508	3.08803	3.26805	3.53726	3.01648	1.46517	2.67894	0.98333	1.22535	0.98333	0.98333	0.98333	0.98333	0.98333	1.00984
NA	2.73853	4.04119	2.69624	2.53736	2.93203	2.88172	1.24427	1.16184	1.45295	1.59655	1.18853	0.98333	1.04793	0.98333	1.01227	1.13553
Thbs4	2.19737	1.88229	3.59004	3.82573	3.58493	2.69971	2.65276	2.22275	1.8411	1.03509	1.71655	1.17552	2.00506	1.76411	1.36622	1.37866
2019-03-01	1.98556	3.06444	2.9996	3.07675	3.2951	3.33698	2.35411	1.95852	3.20874	2.41554	1.12332	1.17552	1.22599	1.14641	1.06847	1.1594
1700048O20Rik	2.19737	2.10984	3.71648	3.5881	2.98273	3.07617	0.98333	1.82352	1.10169	1.75928	1.05502	1.17552	1.40927	1.54767	1.06847	1.11125
2810021J22Rik	3.36836	2.63365	3.06445	2.80768	2.92464	2.85924	0.98333	1.32067	1.73521	1.29069	1.36815	1.11426	1.22599	0.98333	1.09577	1.25114
Cdh19	2.69269	2.54746	3.35753	3.69857	3.28936	2.06347	1.24427	1.04532	0.98333	1.06029	1.5774	1.34509	1.57187	1.14641	1.59389	1.37866
Slc39a2	1.78169	2.10984	4.23957	4.00841	3.56605	1.94038	1.46517	1.04532	2.65245	1.74381	1.05502	1.29075	1.01599	1.29292	1.04064	1.06143
A2ml1	2.13016	1.98423	3.25708	3.1171	3.36776	3.78941	0.98333	2.53512	3.04111	1.96007	0.98333	0.98333	0.98333	1.29292	0.98333	0.98333
Gpr135	2.35284	2.07945	3.31152	3.15634	3.33468	3.37972	0.98333	1.10476	0.98333	1.15691	1.18853	1.29075	1.25364	1.29292	1.32067	1.35817
Gm11627	2.76092	2.69508	2.7855	2.80768	3.56129	2.98914	1.6567	1.36996	1.04372	1.20289	0.98333	1.11426	1.04793	1.29292	1.12256	1.06143
Htr7	2.26158	2.1396	3.04047	3.23177	3.4265	3.48624	0.98333	0.98333	0.98333	1.08506	1.12332	1.17552	1.1978	1.42591	1.09577	1.18289
Gp1bb	1.64393	2.07945	3.60101	3.33799	3.49297	3.35851	1.24427	1.59389	1.97119	1.13335	0.98333	0.98333	1.01599	1.14641	1.06847	1.00984
Peli3	3.00554	2.71498	2.84207	2.90306	3.00393	3.04331	0.98333	1.21675	0.98333	0.98333	1.12332	1.11426	1.1978	1.14641	1.12256	1.206
Grip1	2.22983	2.5695	3.44536	3.43693	2.91721	2.89651	1.24427	1.10476	0.98333	1.08506	1.12332	1.05028	0.98333	0.98333	1.09577	1.00984
Cdkl4	2.26158	2.10984	3.1491	3.23177	3.46267	3.25899	1.6567	1.85847	1.10169	0.98333	1.05502	0.98333	1.07917	0.98333	1.01227	1.00984
Shc4	2.05967	2.61258	3.20769	3.43693	3.04541	3.08911	1.6567	1.21675	1.40771	1.50774	1.31073	1.23429	1.25364	0.98333	1.32067	1.33739
Trem2	2.05967	1.95105	3.27773	3.26805	3.41071	3.44155	2.9739	1.46374	2.72801	1.31182	1.05502	1.23429	1.50442	1.14641	1.17469	1.08656
Zfp385c	2.64534	2.5695	2.85129	3.15634	2.91721	3.24172	1.24427	0.98333	0.98333	0.98333	1.05502	1.05028	1.10976	0.98333	1.06847	1.13553
Pcbd1	1.98556	2.19735	3.04851	3.23177	3.38939	3.52484	1.46517	1.7877	0.98333	1.35319	1.42338	1.11426	1.22599	1.54767	1.20007	1.41877
Cpz	3.42554	3.3067	2.36409	2.53736	2.40379	3.28733	1.46517	1.26965	0.98333	1.15691	1.31073	1.05028	1.07917	1.29292	1.04064	1.18289
Elfn2	2.5457	2.67489	2.9317	3.03525	3.14418	2.96828	0.98333	0.98333	0.98333	0.98333	1.05502	0.98333	1.07917	0.98333	1.14886	1.03587
Syt14	2.09535	2.67489	3.35104	3.03525	3.15053	2.98222	1.6567	1.26965	1.8411	1.72817	0.98333	0.98333	0.98333	0.98333	0.98333	0.98333
Gli2	2.82608	2.45579	2.88758	2.53736	3.65806	2.86677	1.24427	1.5518	1.58073	1.4893	1.12332	1.44799	1.28078	1.14641	1.53527	1.39886
Ninl	3.16514	3.01712	2.92299	3.1171	2.72637	2.23623	1.6567	1.75096	0.98333	1.13335	1.67165	1.49681	1.43365	1.76411	1.75667	1.67213
Tmem266	2.5457	2.67489	3.29134	2.80768	3.15685	2.69971	0.98333	0.98333	0.98333	0.98333	1.12332	1.29075	1.1397	1.29292	1.22501	1.206
Cfap300	3.21464	2.50235	2.79508	2.94848	2.73484	2.85924	1.46517	1.71327	1.53938	1.35319	1.31073	1.34509	1.57187	1.76411	1.36622	1.45781
F5	2.5457	3.43226	2.77585	2.70554	2.82494	2.74945	1.46517	1.26965	1.73521	1.20289	0.98333	0.98333	1.01599	0.98333	0.98333	1.06143
Zfp783	2.5457	2.65442	3.29134	3.07675	2.92464	2.52984	1.24427	1.16184	0.98333	1.78973	1.31073	1.75942	1.65717	1.14641	1.38847	1.82922
Otof	2.38202	2.77311	3.45749	3.03525	3.05221	2.31542	1.24427	1.21675	1.8411	1.89152	0.98333	0.98333	0.98333	0.98333	0.98333	0.98333
Arhgap36	1.94702	2.10984	2.99129	3.07675	3.15053	3.72871	0.98333	1.10476	0.98333	0.98333	0.98333	0.98333	0.98333	0.98333	1.01227	0.98333
Psma8	3.55929	3.16916	2.59012	2.65163	2.29335	2.72479	0.98333	1.59389	1.58073	1.24746	1.62529	1.91121	1.85066	1.29292	2.00725	1.68863
1700003E16Rik	1.98556	2.47926	3.33799	2.65163	3.4265	3.09553	0.98333	1.21675	1.21107	1.59655	0.98333	1.05028	1.04793	0.98333	1.01227	0.98333
Tnfaip6	2.26158	2.82898	2.8046	3.07675	2.9969	2.98222	1.24427	0.98333	0.98333	1.24746	1.18853	1.23429	1.52725	1.54767	1.14886	1.41877
1700088E04Rik	2.80468	2.3579	2.98292	3.07675	2.84857	2.87426	1.46517	2.11124	1.58073	1.72817	1.67165	1.54404	1.63631	1.29292	1.27363	1.41877
Rgs11	2.16415	2.67489	3.57898	3.7762	2.96843	1.77412	1.46517	1.32067	1.10169	0.98333	0.98333	0.98333	0.98333	0.98333	1.04064	0.98333
Ggt1	2.02309	1.81009	3.6227	3.89698	3.24257	2.32639	2.11398	1.16184	3.46209	2.63269	0.98333	0.98333	0.98333	0.98333	0.98333	0.98333
Lor	2.05967	2.1396	2.88758	2.70554	3.42126	3.66102	0.98333	1.21675	1.04372	0.98333	1.36815	1.54404	2.0842	1.29292	1.77367	1.90179
Fbxo16	2.57126	2.01667	2.98292	2.85615	3.10548	3.30407	0.98333	1.36996	2.30308	1.83424	0.98333	1.05028	1.04793	1.14641	1.04064	1.00984
Kctd8	2.32306	2.5695	3.08803	2.94848	3.01093	2.86677	2.11398	1.10476	2.00195	1.69637	0.98333	1.05028	1.01599	0.98333	1.01227	1.06143
Cideb	2.5457	2.16877	2.79508	3.07675	3.20035	2.92565	1.24427	1.04532	1.66004	1.18008	1.05502	1.17552	1.07917	1.29292	1.24953	1.206
Runx2	2.90861	2.54746	3.08021	2.99252	2.76826	2.39049	2.55992	1.63479	1.62093	2.07581	1.05502	1.17552	1.01599	1.42591	1.09577	1.1594
Gcnt4	1.86672	1.98423	3.39583	3.64439	3.41071	2.34807	0.98333	0.98333	0.98333	0.98333	0.98333	1.05028	1.07917	0.98333	1.04064	1.206
Gpr68	2.22983	2.5912	2.61198	2.85615	3.41599	2.89651	1.6567	1.85847	0.98333	1.37344	1.12332	0.98333	1.16904	1.14641	1.17469	1.08656
Spsb4	2.22983	2.5912	2.96605	2.70554	3.18805	2.91115	1.46517	0.98333	1.31274	0.98333	1.8834	1.75942	1.83243	1.95228	1.32067	1.49581
Lmntd1	3.88901	3.21182	2.54539	1.86863	2.39312	2.68274	2.35411	2.08197	0.98333	2.2057	1.31073	1.17552	1.25364	0.98333	1.41038	1.73703
Dgki	2.29265	2.50235	2.99129	2.99252	2.93203	2.82871	1.24427	0.98333	0.98333	1.00944	0.98333	0.98333	1.01599	0.98333	1.04064	1.03587
Sbsn	2.13016	2.50235	3.25012	3.15634	3.04541	2.44182	1.24427	1.46374	1.80666	1.31182	1.12332	1.23429	1.40927	1.42591	1.20007	1.29491
Gal3st1	1.86672	2.52508	3.16397	3.30345	2.87181	2.77369	2.23904	1.92594	0.98333	1.9055	0.98333	0.98333	1.01599	0.98333	1.09577	1.00984
Pcdh15	2.26158	2.45579	3.22197	3.52952	2.91721	2.11497	0.98333	0.98333	0.98333	0.98333	0.98333	0.98333	1.01599	0.98333	1.04064	1.00984
Lin7a	2.29265	2.52508	2.71656	2.90306	2.78468	3.20654	0.98333	0.98333	0.98333	0.98333	0.98333	1.05028	1.01599	0.98333	1.06847	1.00984
Mas1	2.19737	2.43193	3.21485	2.99252	2.6567	2.92565	0.98333	0.98333	0.98333	0.98333	1.18853	1.17552	0.98333	0.98333	1.09577	1.03587
Frem2	2.62107	3.19774	2.79508	3.1171	2.46621	2.21278	0.98333	0.98333	0.98333	1.31182	1.84346	1.49681	1.9554	1.42591	1.24953	1.39886
Slc27a2	2.57126	1.95105	2.86045	2.94848	3.07909	2.98222	1.46517	1.36996	0.98333	0.98333	0.98333	0.98333	1.07917	0.98333	1.04064	1.03587
Ndufa13	1.49161	2.01667	3.25708	2.90306	3.53241	3.18862	1.6567	1.21675	1.40771	1.80472	1.05502	1.23429	1.40927	1.76411	1.24953	1.37866
Tmem200a	1.90743	1.81009	2.97451	2.94848	3.22462	3.49112	1.97705	1.50844	1.58073	1.47063	0.98333	0.98333	1.01599	0.98333	0.98333	1.06143
Frmpd1	2.35284	2.30634	2.90539	2.41325	3.41071	2.92565	0.98333	1.16184	0.98333	0.98333	0.98333	0.98333	1.07917	0.98333	1.09577	1.03587
Col22a1	2.78297	2.73462	2.71656	2.34694	2.80092	2.92565	0.98333	1.21675	0.98333	1.57922	1.31073	1.17552	1.25364	1.29292	1.38847	1.206
Omp	1.94702	2.22538	2.71656	2.80768	3.11849	3.40063	1.46517	1.21675	1.45295	1.96007	0.98333	1.11426	1.07917	1.14641	0.98333	1.11125
Vipr2	1.64393	2.30634	3.09581	3.46846	3.03858	2.6482	1.46517	1.36996	1.80666	1.06029	1.36815	1.54404	1.698	1.76411	1.43196	1.68863
Dnah1	2.05967	2.10984	3.07235	3.23177	2.9969	2.72479	2.82225	2.02156	1.58073	2.38594	0.98333	1.05028	1.01599	0.98333	1.04064	1.03587
Ptpn22	2.51968	2.5912	3.1491	3.4047	2.80897	1.67464	2.9739	2.11124	0.98333	1.50774	1.12332	1.23429	1.1978	1.29292	1.01227	1.206
Bco2	3.02417	2.93463	2.53399	2.75751	2.4249	2.4317	2.65276	1.26965	2.57272	2.51002	1.05502	1.11426	1.04793	0.98333	1.06847	1.08656
Tfap2a	2.86793	2.96819	2.43936	2.41325	2.46621	2.91842	1.46517	1.21675	1.2628	1.89152	0.98333	0.98333	0.98333	0.98333	0.98333	1.06143
Gpr176	2.26158	2.40767	2.77585	2.34694	3.32348	2.92565	1.6567	1.32067	0.98333	1.35319	1.05502	1.05028	1.04793	0.98333	1.01227	0.98333
Chdh	1.78169	2.43193	3.2981	3.19455	2.91721	2.4009	0.98333	1.26965	0.98333	0.98333	1.05502	0.98333	1.04793	0.98333	1.01227	1.03587
Capn6	3.14825	2.77311	2.76613	2.20443	2.47636	2.63061	1.24427	1.10476	0.98333	1.03509	1.05502	1.17552	1.30741	1.29292	1.38847	1.56894
Lrrc3	2.19737	2.33235	2.7855	2.85615	2.92464	2.85924	1.6567	1.59389	0.98333	1.77458	1.47657	1.23429	1.28078	1.65994	1.20007	1.31631
Zfp618	2.88841	2.47926	2.94898	2.47664	2.60215	2.55803	0.98333	1.36996	1.04372	1.24746	1.36815	1.05028	1.45763	1.65994	1.22501	1.45781
Pigz	2.09535	1.98423	3.2005	2.94848	2.90974	2.81321	0.98333	1.21675	0.98333	0.98333	1.12332	1.11426	1.04793	0.98333	1.14886	0.98333
Adamts20	1.86672	2.30634	3.33799	3.64439	2.98273	1.75801	1.6567	1.36996	0.98333	0.98333	0.98333	0.98333	1.07917	0.98333	0.98333	1.08656
Frmd3	2.22983	2.22538	2.90539	3.03525	3.18805	2.30437	1.24427	1.16184	0.98333	1.77458	1.25093	1.11426	1.22599	1.14641	1.70442	1.18289
Fam198a	1.86672	1.95105	3.14161	3.33799	3.36229	2.20091	1.82575	1.63479	2.32758	1.84877	0.98333	1.05028	1.01599	0.98333	1.01227	1.03587
Mpzl3	3.24672	2.91755	2.46361	2.04628	2.47636	2.70812	2.23904	1.85847	0.98333	1.6306	1.36815	1.49681	1.45763	1.42591	1.32067	1.37866
Robo3	2.13016	1.98423	3.5224	3.61652	2.90224	1.67464	1.6567	1.04532	1.40771	1.06029	1.18853	1.17552	1.04793	0.98333	0.98333	0.98333
Tacr1	2.02309	2.07945	3.04047	2.34694	2.91721	3.39543	1.6567	1.21675	3.23488	1.99969	0.98333	1.17552	1.01599	0.98333	1.06847	1.08656
Sugct	2.64534	2.22538	2.64416	2.47664	3.03172	2.73306	1.6567	1.36996	1.21107	1.75928	1.31073	1.23429	1.30741	1.54767	1.43196	1.25114
Gabrq	1.43704	2.3579	2.79508	2.94848	2.92464	3.28733	0.98333	1.59389	0.98333	1.39341	0.98333	0.98333	1.04793	0.98333	1.01227	1.03587
Efcab1	1.78169	2.10984	2.91422	3.33799	2.84074	2.68274	1.82575	1.21675	0.98333	1.45171	0.98333	0.98333	0.98333	0.98333	0.98333	0.98333
Cercam	2.71579	2.43193	2.9317	2.70554	2.62056	2.2593	0.98333	1.16184	0.98333	0.98333	1.5774	1.29075	1.67773	1.54767	1.77367	1.91587
Prph	1.38033	1.52446	3.2005	3.30345	3.3122	2.90385	1.24427	1.46374	1.31274	1.47063	1.12332	1.05028	1.07917	0.98333	0.98333	1.03587
Kcp	2.02309	2.61258	3.27773	3.1171	2.63874	1.94038	1.82575	1.21675	1.49681	1.35319	1.25093	1.44799	1.35924	1.76411	1.29734	1.27319
Rxfp1	1.98556	2.54746	3.09581	2.70554	2.73484	2.51074	1.46517	1.16184	1.62093	1.29069	0.98333	0.98333	1.01599	0.98333	1.22501	1.37866
Cyp4f15	1.98556	2.10984	3.13407	2.85615	3.17565	2.23623	1.82575	1.50844	1.66004	1.71236	0.98333	0.98333	0.98333	0.98333	0.98333	1.00984
Stk32a	1.86672	2.16877	3.02426	2.90306	3.13139	2.39049	2.35411	2.67894	0.98333	2.03825	1.05502	1.11426	1.01599	1.14641	1.09577	0.98333
Rdh5	1.43704	1.88229	3.43314	2.85615	2.92464	2.91842	0.98333	1.67456	0.98333	1.64732	1.18853	1.49681	1.61515	1.29292	1.22501	1.51445
Lair1	1.69132	1.98423	3.25708	3.15634	2.87948	2.44182	2.82225	1.5518	1.73521	1.50774	1.42338	1.23429	1.50442	1.29292	1.14886	1.22875
Gdpd2	1.78169	1.95105	3.48143	3.15634	2.74327	2.2707	1.97705	1.36996	2.39867	1.6306	1.25093	1.67709	1.30741	1.29292	1.75667	1.33739
Gm10037	2.22983	2.3579	2.76613	2.99252	2.55505	2.4816	1.6567	0.98333	1.58073	1.08506	1.42338	1.67709	1.54974	1.76411	1.38847	1.25114
NA	1.98556	1.56889	3.29134	3.9868	2.6567	1.88211	0.98333	1.7877	2.37536	1.80472	1.71655	1.39746	1.38447	0.98333	1.59389	1.60416
B230216N24Rik	2.35284	2.1396	2.97451	2.65163	2.66559	2.54869	0.98333	1.36996	0.98333	1.22535	0.98333	1.11426	1.07917	1.29292	1.01227	1.03587
1700001L19Rik	1.64393	2.16877	2.86045	2.70554	3.04541	2.89651	2.11398	1.10476	3.02622	1.94662	0.98333	0.98333	1.04793	0.98333	0.98333	1.00984
Ctf1	3.52045	2.61258	2.04864	2.20443	2.48643	2.42151	2.11398	1.36996	0.98333	1.69637	1.12332	1.29075	1.50442	1.95228	1.43196	1.35817
Gli1	3.32394	2.33235	2.66522	2.47664	2.31612	2.1647	0.98333	1.32067	0.98333	1.06029	1.05502	1.44799	1.25364	1.54767	1.12256	1.08656
NA	2.22983	2.16877	3.0565	2.59562	2.54545	2.67418	1.82575	1.32067	1.97119	1.37344	1.18853	1.17552	1.16904	1.29292	1.22501	1.29491
Nipal4	1.90743	1.95105	2.60109	2.94848	2.75998	3.02323	0.98333	1.04532	0.98333	1.20289	1.12332	1.34509	1.28078	1.65994	1.32067	1.35817
Sult2b1	1.82483	1.84664	2.68597	2.75751	2.84074	3.14592	1.6567	1.10476	0.98333	1.81955	0.98333	0.98333	0.98333	0.98333	0.98333	1.00984
Serpina9	2.19737	1.65385	3.09581	2.99252	2.47636	2.66557	0.98333	1.63479	0.98333	0.98333	1.05502	1.05028	1.01599	1.14641	0.98333	1.25114
Ranbp17	2.51968	2.27986	2.90539	2.99252	2.41438	1.95459	1.24427	1.41761	1.21107	1.29069	1.67165	1.49681	1.63631	1.76411	1.34362	1.63855
Dhtkd1	2.69269	2.27986	2.91422	3.1171	2.22278	1.82139	2.11398	1.36996	0.98333	1.22535	1.42338	1.23429	1.45763	1.14641	1.51519	1.51445
Cd46	1.43704	1.81009	3.70635	3.67173	3.00393	1.41179	1.6567	1.5518	1.62093	1.66386	1.67165	1.67709	1.28078	1.65994	1.38847	1.31631
Kcns3	2.09535	2.01667	2.73659	3.07675	2.37154	2.71648	1.82575	1.21675	1.21107	1.20289	1.31073	1.79889	1.43365	1.42591	1.29734	1.67213
Sdsl	1.90743	1.91708	3.17135	2.53736	2.83286	2.6128	0.98333	1.41761	1.66004	1.03509	1.12332	1.44799	1.77635	1.86126	1.51519	1.37866
Ccdc151	2.26158	1.73408	2.68597	2.99252	2.62056	2.67418	1.46517	1.50844	3.18212	1.89152	1.12332	1.05028	0.98333	0.98333	1.06847	0.98333
Zfp677	2.38202	2.61258	2.35115	2.85615	2.18616	2.52984	0.98333	1.32067	0.98333	1.29069	1.36815	1.44799	1.38447	1.29292	1.17469	1.95732
Adra1d	2.26158	2.16877	2.40222	2.59562	2.70063	2.75757	0.98333	1.26965	0.98333	0.98333	1.18853	1.05028	1.1978	1.42591	1.04064	1.06143
Flt3	2.05967	2.27986	2.67563	2.75751	2.75998	2.28201	1.6567	1.41761	3.19549	1.35319	1.12332	1.17552	0.98333	0.98333	1.06847	1.00984
Asb16	2.26158	1.91708	2.53399	2.34694	2.7765	2.91842	0.98333	0.98333	0.98333	0.98333	1.05502	1.11426	1.22599	0.98333	1.20007	1.06143
Cdkl1	2.02309	2.30634	2.71656	2.70554	2.4457	2.52984	0.98333	1.04532	1.58073	0.98333	1.67165	1.29075	1.57187	1.29292	1.51519	1.82922
Kcne2	2.05967	1.73408	2.77585	2.12752	2.88711	2.96828	1.24427	1.7877	0.98333	1.13335	0.98333	0.98333	0.98333	0.98333	0.98333	0.98333
Zfp354b	2.35284	2.27986	2.48745	2.75751	2.49644	2.07652	0.98333	1.50844	0.98333	0.98333	1.5774	1.44799	1.57187	1.14641	1.43196	1.551
Acat3	1.78169	1.88229	2.70643	2.90306	2.5646	2.60382	1.97705	1.75096	0.98333	1.24746	1.52787	1.39746	1.10976	1.14641	1.09577	1.03587
Eya4	2.29265	2.0484	2.8046	2.59562	2.62968	2.0503	1.46517	1.04532	0.98333	0.98333	1.05502	1.17552	1.04793	0.98333	0.98333	1.00984
Hpgds	1.64393	2.1396	3.04851	2.90306	2.47636	2.20091	1.97705	1.21675	2.06159	1.84877	1.25093	1.17552	1.25364	0.98333	1.12256	1.06143
Cldn2	3.43948	2.07945	2.22918	2.12752	2.19847	2.28201	2.23904	1.46374	0.98333	1.24746	0.98333	0.98333	0.98333	0.98333	0.98333	0.98333
Cubn	3.46698	2.54746	1.74667	1.96019	2.04333	2.58568	0.98333	1.32067	1.04372	1.03509	1.12332	1.63409	1.75715	1.54767	1.49483	1.43842
Pbx4	1.78169	1.95105	2.49923	2.70554	3.01093	2.4009	2.55992	1.16184	1.53938	1.61367	0.98333	1.05028	0.98333	0.98333	0.98333	1.03587
Thsd7b	1.98556	1.98423	2.74651	2.34694	2.62056	2.6482	0.98333	0.98333	0.98333	1.24746	0.98333	1.05028	1.01599	0.98333	1.14886	1.06143
Bbox1	1.98556	2.1396	2.51091	2.80768	2.61138	2.2707	0.98333	2.80971	1.04372	1.71236	0.98333	0.98333	0.98333	0.98333	0.98333	0.98333
Adra2b	2.94817	2.27986	2.06457	1.77087	2.17375	3.06312	0.98333	1.26965	0.98333	1.00944	1.62529	1.49681	1.67773	1.65994	1.29734	1.75281
Mok	1.73721	2.19735	3.1265	2.75751	2.30478	2.08945	1.6567	1.8926	1.31274	1.69637	1.05502	1.23429	1.04793	1.29292	1.09577	1.11125
Zfp599	1.82483	2.01667	2.72661	2.53736	2.4457	2.6128	0.98333	1.10476	0.98333	0.98333	1.18853	1.23429	1.10976	1.14641	1.06847	1.25114
Ace2	0.98333	1.22462	3.71648	3.75079	3.02482	1.43224	2.55992	1.82352	2.00195	2.2057	1.12332	0.98333	1.07917	1.14641	1.09577	1.06143
NA	1.90743	1.88229	2.69624	2.75751	2.75998	2.12757	0.98333	1.63479	0.98333	0.98333	1.42338	1.54404	1.45763	1.65994	1.43196	1.25114
Rps6ka6	1.86672	2.1396	2.85129	2.53736	2.48643	2.22455	1.46517	1.04532	1.62093	1.6306	0.98333	1.23429	1.1978	1.14641	0.98333	1.206
Syne4	2.09535	1.73408	3.08021	2.80768	2.54545	1.82139	1.6567	1.36996	2.00195	1.83424	0.98333	0.98333	1.04793	0.98333	0.98333	1.03587
Hs3st5	2.02309	2.30634	2.42709	2.47664	2.32738	2.4816	0.98333	0.98333	0.98333	0.98333	1.18853	1.29075	1.07917	1.14641	1.06847	1.1594
Egfem1	1.69132	1.98423	2.56793	2.99252	2.38237	2.38	1.46517	1.21675	1.73521	1.4893	1.42338	0.98333	1.30741	1.14641	1.34362	1.08656
Prr16	2.16415	1.98423	2.45154	2.12752	2.64775	2.57652	1.46517	1.16184	0.98333	1.20289	0.98333	0.98333	1.01599	1.14641	1.01227	0.98333
Bnc2	3.41145	2.45579	1.7066	1.77087	1.97341	2.51074	1.46517	1.21675	1.40771	1.54392	0.98333	0.98333	0.98333	0.98333	1.09577	1.03587
Saxo2	2.22983	1.77259	2.41471	2.70554	2.41438	2.21278	1.6567	1.67456	2.2528	1.39341	1.05502	1.05028	1.1978	1.14641	1.17469	1.06143
Gpr75	1.78169	1.84664	2.54539	2.34694	2.58349	2.63061	0.98333	0.98333	0.98333	0.98333	1.12332	0.98333	0.98333	0.98333	1.04064	0.98333
Capn3	1.69132	2.01667	2.68597	2.34694	2.49644	2.46185	1.6567	0.98333	0.98333	1.13335	1.31073	1.17552	1.1397	0.98333	1.12256	1.206
Pla2g4e	1.78169	1.77259	3.01609	2.94848	2.45599	1.70857	0.98333	0.98333	0.98333	0.98333	1.42338	1.34509	1.28078	1.54767	1.32067	1.45781
Prcd	1.38033	1.91708	2.51091	2.80768	2.81698	2.24781	0.98333	1.67456	0.98333	1.18008	1.05502	1.11426	1.07917	1.14641	1.12256	1.25114
Zfp786	1.54419	1.88229	2.45154	3.1171	2.23479	2.42151	1.46517	1.16184	2.0905	1.33266	1.12332	1.34509	1.28078	0.98333	1.36622	1.25114
D7Ertd443e	1.43704	2.1396	2.38962	2.70554	2.71784	2.24781	0.98333	0.98333	1.62093	1.00944	1.05502	1.11426	1.1397	1.42591	1.09577	1.00984
Pipox	1.82483	1.88229	2.85129	2.80768	2.12299	2.08945	0.98333	1.16184	1.361	0.98333	0.98333	0.98333	1.1397	1.54767	1.06847	1.03587
Ntn5	2.29265	2.25288	1.80476	2.04628	2.54545	2.59477	2.11398	1.04532	1.58073	1.33266	0.98333	0.98333	0.98333	0.98333	1.01227	0.98333
Gm5148	1.86672	2.07945	2.43936	2.41325	2.28183	2.4009	0.98333	1.10476	1.53938	1.4893	0.98333	0.98333	0.98333	0.98333	1.04064	1.11125
Cth	1.69132	2.16877	2.29821	2.20443	2.68322	2.42151	0.98333	1.59389	1.49681	1.4893	0.98333	1.05028	1.38447	0.98333	1.34362	1.41877
Ovgp1	1.90743	1.81009	2.86955	2.90306	2.4249	1.5492	1.24427	1.36996	1.87474	1.56168	1.05502	1.39746	1.16904	0.98333	1.01227	1.1594
Oxtr	2.13016	1.88229	2.21497	2.12752	2.4249	2.66557	0.98333	1.10476	1.21107	0.98333	1.31073	1.29075	1.38447	1.95228	1.36622	1.39886
NA	1.78169	2.22538	2.33809	2.75751	2.24669	2.08945	0.98333	0.98333	0.98333	0.98333	0.98333	0.98333	0.98333	0.98333	1.01227	0.98333
Adap2	3.09638	2.30634	2.40222	2.34694	1.85398	1.41179	0.98333	1.36996	1.45295	1.41311	1.12332	1.39746	1.33356	1.29292	1.63168	1.29491
Fstl4	1.49161	1.81009	2.59012	2.47664	2.28183	2.76565	0.98333	0.98333	1.04372	0.98333	0.98333	1.05028	0.98333	1.14641	1.01227	0.98333
Fam71e1	1.82483	1.73408	2.57907	2.70554	2.41438	2.12757	1.46517	1.26965	1.73521	1.50774	1.25093	1.05028	1.22599	1.54767	1.01227	1.1594
P2ry13	1.19544	2.25288	2.52249	2.12752	2.39312	2.86677	1.46517	1.16184	1.80666	1.26923	0.98333	1.05028	1.1397	1.42591	1.04064	1.00984
Sytl1	2.19737	2.47926	2.32492	2.27745	1.97341	2.08945	1.82575	1.21675	2.55208	1.78973	0.98333	1.11426	0.98333	1.14641	0.98333	1.00984
Katnal2	1.78169	2.1396	2.31163	2.27745	2.62968	2.20091	2.35411	1.36996	1.90761	1.20289	1.05502	1.05028	1.16904	1.14641	0.98333	1.06143
Hkdc1	2.02309	2.10984	2.46361	2.12752	2.23479	2.30437	1.97705	1.59389	1.87474	1.84877	0.98333	1.05028	0.98333	0.98333	1.01227	0.98333
Faxc	2.22983	2.5695	2.17147	1.96019	2.37154	1.94038	1.46517	1.21675	1.66004	1.47063	0.98333	1.17552	1.07917	0.98333	0.98333	1.06143
Efhc2	2.66921	2.77311	1.93184	2.20443	1.92978	1.67464	0.98333	1.10476	0.98333	1.13335	1.12332	1.05028	1.01599	1.29292	1.06847	1.08656
Upb1	2.96755	1.88229	2.06457	1.666	2.23479	2.35879	1.82575	1.04532	0.98333	1.87741	1.12332	0.98333	1.07917	1.29292	1.04064	1.03587
Dgkg	2.35284	3.03306	1.84222	2.20443	1.85398	1.85207	1.24427	0.98333	1.15741	0.98333	0.98333	0.98333	1.04793	1.14641	0.98333	1.00984
Thpo	2.13016	2.0484	2.48745	2.59562	2.4249	1.43224	0.98333	1.04532	0.98333	1.31182	1.18853	1.05028	1.04793	0.98333	1.01227	1.03587
Pla2g3	1.54419	1.47862	2.70643	2.59562	2.90224	1.88211	1.46517	1.04532	0.98333	0.98333	1.12332	1.23429	1.07917	0.98333	1.06847	1.06143
Pdzrn4	1.90743	1.98423	2.42709	2.04628	2.36062	2.33727	0.98333	0.98333	0.98333	0.98333	1.31073	0.98333	1.1397	0.98333	1.09577	1.18289
Ppil6	1.82483	1.95105	2.33809	2.47664	2.31612	2.14005	1.82575	1.21675	0.98333	1.10941	0.98333	0.98333	1.1978	1.42591	1.17469	1.13553
Esyt3	2.43867	2.5912	1.8606	2.27745	1.89994	1.96866	1.6567	1.67456	1.58073	1.22535	1.18853	1.11426	1.07917	0.98333	1.01227	1.1594
Zim1	2.02309	2.1396	2.20061	1.86863	2.67443	2.10227	0.98333	1.10476	0.98333	1.33266	1.52787	1.23429	1.10976	1.14641	1.14886	1.29491
Prlr	1.43704	1.612	2.42709	2.65163	2.4457	2.41124	1.24427	1.04532	0.98333	1.69637	1.25093	1.58976	1.25364	0.98333	1.34362	1.29491
Vash2	1.69132	1.73408	2.28466	2.59562	2.24669	2.36944	0.98333	0.98333	0.98333	1.06029	1.12332	1.05028	1.33356	0.98333	1.01227	1.13553
Cstad	2.09535	1.65385	2.15668	2.20443	2.5646	2.23623	0.98333	0.98333	0.98333	2.02551	0.98333	0.98333	1.38447	1.14641	1.06847	1.1594
P4ha3	1.49161	1.56889	2.36409	2.70554	2.38237	2.36944	1.46517	1.10476	0.98333	0.98333	1.12332	1.11426	1.28078	1.42591	1.12256	1.08656
BC025920	1.73721	1.88229	2.32492	2.47664	2.33854	2.11497	0.98333	1.10476	0.98333	0.98333	1.31073	1.29075	1.52725	1.29292	1.34362	1.60416
Trp63	2.22983	1.95105	2.18612	2.20443	2.37154	1.82139	0.98333	0.98333	0.98333	1.31182	0.98333	0.98333	1.10976	0.98333	1.04064	1.03587
Grp	1.86672	1.77259	2.14173	2.20443	2.24669	2.49138	1.24427	2.37536	0.98333	1.15691	0.98333	1.23429	0.98333	0.98333	0.98333	0.98333
Fam131c	1.78169	1.47862	2.18612	2.27745	2.37154	2.58568	0.98333	0.98333	0.98333	0.98333	1.36815	1.29075	1.16904	1.29292	1.17469	1.18289
Efcab12	1.82483	1.47862	2.71656	2.65163	2.2585	1.72524	1.82575	0.98333	2.06159	1.31182	0.98333	1.05028	1.07917	0.98333	0.98333	1.08656
Dyrk3	1.32129	1.73408	2.06457	2.47664	2.32738	2.63943	0.98333	1.10476	1.80666	0.98333	1.18853	1.29075	1.22599	1.29292	1.06847	1.08656
Spag4	1.94702	1.88229	2.35115	2.41325	2.09692	1.86717	1.24427	1.32067	0.98333	0.98333	1.25093	1.44799	1.22599	0.98333	1.17469	1.206
Mum1l1	2.16415	2.5695	2.01622	1.96019	1.79034	1.92603	0.98333	1.21675	0.98333	0.98333	1.12332	1.11426	1.45763	1.42591	1.22501	1.33739
Kcna1	1.69132	2.0484	2.11136	2.20443	2.13584	2.08945	0.98333	1.16184	0.98333	0.98333	0.98333	0.98333	1.01599	0.98333	0.98333	0.98333
Prtg	1.94702	1.77259	2.06457	2.27745	2.38237	1.82139	0.98333	0.98333	1.10169	1.03509	1.25093	1.11426	1.07917	1.42591	1.41038	1.31631
Samd11	1.32129	1.98423	2.29821	2.53736	2.05691	2.01005	1.6567	1.21675	1.04372	0.98333	1.36815	1.29075	1.07917	0.98333	1.12256	0.98333
Zbtb8b	2.02309	1.77259	2.22918	1.43019	2.30478	2.41124	0.98333	1.16184	0.98333	0.98333	1.12332	0.98333	1.04793	0.98333	1.32067	1.08656
Sntg2	2.13016	2.07945	2.15668	1.96019	1.88478	1.8969	0.98333	1.26965	0.98333	1.50774	1.36815	1.23429	1.22599	1.29292	1.34362	1.25114
Gm38402	1.73721	1.612	2.33809	2.20443	2.24669	1.95459	0.98333	1.21675	0.98333	1.29069	1.12332	1.23429	1.16904	0.98333	1.29734	1.11125
Ppp1r3f	1.78169	1.56889	1.94912	2.27745	2.30478	2.15243	1.24427	1.32067	0.98333	1.61367	0.98333	1.11426	1.04793	0.98333	1.09577	1.03587
Ano2	1.49161	1.52446	2.55671	2.04628	2.4249	1.95459	1.6567	0.98333	0.98333	1.24746	1.18853	1.17552	1.45763	1.42591	1.29734	1.1594
Agbl2	2.16415	1.88229	2.20061	2.41325	1.89994	1.41179	1.82575	1.5518	1.21107	1.20289	1.12332	1.05028	1.1397	1.14641	1.09577	1.03587
Gpr137c	2.26158	2.19735	1.99973	2.04628	1.63598	1.58616	1.24427	1.26965	0.98333	0.98333	0.98333	1.11426	1.10976	0.98333	1.12256	1.31631
Map3k13	2.13016	2.25288	1.8606	1.86863	1.65397	1.86717	0.98333	1.21675	0.98333	1.45171	1.05502	1.11426	1.1397	0.98333	1.41038	1.49581
Tomm6os	1.73721	1.56889	2.11136	2.34694	2.02961	1.70857	0.98333	1.32067	0.98333	1.20289	1.05502	1.17552	1.10976	1.14641	1.14886	1.06143
Crb2	1.43704	1.81009	1.96619	2.41325	1.95901	1.74171	0.98333	1.16184	0.98333	1.33266	1.05502	1.05028	1.10976	0.98333	1.04064	1.11125
Ttc34	1.54419	1.38232	2.15668	2.12752	2.09692	1.95459	1.46517	1.46374	0.98333	1.29069	1.05502	1.17552	0.98333	1.14641	1.09577	1.1594
Phtf1os	1.64393	1.52446	2.06457	1.96019	1.82251	1.98259	1.24427	1.21675	1.40771	1.33266	1.12332	1.17552	1.1397	0.98333	1.22501	1.206
Gdf1	1.98556	2.43193	1.68614	1.86863	1.5425	1.47229	0.98333	0.98333	0.98333	0.98333	1.12332	0.98333	1.04793	0.98333	1.01227	1.03587
NA	1.78169	1.52446	2.03252	1.96019	1.68929	1.86717	0.98333	1.04532	0.98333	0.98333	0.98333	1.05028	1.38447	1.14641	1.22501	1.13553
Avil	2.22983	2.19735	1.62296	1.55291	1.94447	1.16536	0.98333	1.32067	0.98333	1.00944	1.36815	1.34509	1.1397	1.14641	1.06847	1.1594
9030612E09Rik	2.02309	1.43127	1.8606	1.55291	2.02961	1.79005	0.98333	1.04532	0.98333	1.13335	1.36815	1.39746	1.22599	0.98333	1.22501	1.13553
Actn3	1.78169	1.612	1.43956	1.77087	2.11001	1.67464	0.98333	1.10476	0.98333	0.98333	1.05502	0.98333	0.98333	1.42591	1.06847	1.18289
Atp2a1	1.82483	1.43127	1.43956	1.43019	2.05691	2.06347	1.24427	1.10476	1.58073	0.98333	0.98333	1.05028	0.98333	0.98333	1.04064	1.13553
Ccno	1.32129	1.27912	1.98306	2.12752	1.37907	1.95459	1.24427	1.36996	0.98333	1.24746	0.98333	1.17552	1.07917	0.98333	0.98333	1.06143
Fbxw10	1.59492	1.65385	1.4638	1.55291	1.50335	1.4919	0.98333	0.98333	0.98333	1.15691	1.12332	0.98333	1.04793	0.98333	0.98333	1.00984
