# Supplementary material for: Endothelial heterogeneity across distinct vascular beds during homeostasis and inflammation
Source: eLife journal article supplement (doi:10.7554/elife.51413), 2020-01-16
Supplement: supp [file elife-51413-supp-v1.zip › elife_poa_e51413_Supplementary_file_2.xlsx]

## Sheet: Most LogFC Ribotag Lung EC gene
	0L2_S	0La_S	0L6_	0L7_	0H1_S	0H2_S	0H_S	0H_S.1	0H6_	0H7_	0B1_S	0B2_S	0B_S	0B_S.1	0B6_	0B7_
Sftpc	13.2835	10.7645	13.1278	12.9525	-1.52343	5.37081	-1.38484	-1.04771	-0.817005	-1.48555	-0.835841	-1.56872	0.163978	0.268059	-0.0172606	0.304076
Ager	9.08203	7.49125	9.49893	9.62728	-0.864286	1.74247	-0.611457	-0.473252	-0.539932	-0.327263	-1.50838	-0.345575	1.37356	1.26334	0.194216	-0.0457847
Slc6a2	7.56061	9.06019	9.30438	8.67979	-2.01667	3.0242	-2.01667	-2.01667	-2.01667	-2.01667	-0.195312	-1.22741	0.741484	-0.462639	0.242574	0.789418
Chil3	7.91709	4.81302	9.42653	4.51878	-2.01667	2.33239	-2.01667	-2.01667	-2.01667	-1.64182	-1.50838	-0.345575	0.0404743	-2.01667	0.289363	-0.226307
Wfdc2	10.5567	6.8113	10.1358	9.6257	-1.15654	0.458399	-1.22365	-1.04771	-0.539932	-0.989199	2.8767	2.42649	1.9891	1.52559	2.66242	2.8011
NA	12.4135	6.84981	13.6621	12.4142	3.94079	3.59448	5.41796	5.51334	5.51085	4.64981	0.113882	5.22527	4.99402	4.95941	3.91329	4.90256
Clec7a	8.04892	2.27726	7.98561	5.24722	0.206265	-0.14484	0.0238576	0.516171	-1.16025	-0.262385	-1.50838	-2.01667	0.277738	0.268059	-0.943081	-0.859942
Muc1	8.40643	4.76777	8.15002	7.09834	0.327029	0.356267	-0.0418523	0.516171	0.0119157	-0.262385	0.681688	0.502674	-0.0254829	-0.0515152	-0.135888	-0.432692
Retnla	8.23685	3.55969	7.30492	6.07799	-0.0706064	0.356267	0.83691	1.09759	-0.626509	0.306824	-1.13327	-2.01667	-0.81388	-2.01667	-1.3107	-2.01667
NA	9.21928	8.97216	9.0109	7.11497	-0.864286	3.70249	-1.22365	0.255258	0.410107	-0.704298	-0.589372	0.0798758	1.23958	1.84673	1.30455	1.44142
Lyz1	6.5414	5.7589	5.85096	6.40809	-0.0706064	0.727475	-0.182995	0.737046	-2.01667	-1.48555	-2.01667	-1.56872	-2.01667	-2.01667	-2.01667	-2.01667
NA	7.49316	5.79092	8.10113	7.8787	0.541898	1.26723	1.65271	0.516171	0.855607	0.578804	-0.589372	-0.0484876	0.103547	-1.0398	-0.650369	-0.226307
Hoxa5	8.05105	7.54588	9.58496	8.49202	1.75264	2.86595	2.12646	2.7302	2.11549	2.09756	-2.01667	-2.01667	-0.500768	-1.0398	0.334682	-2.01667
Krt7	6.91388	5.32512	7.21586	7.04884	-0.231908	-0.14484	-1.07867	-2.01667	-0.539932	0.429713	1.08807	-1.56872	-0.409871	-0.0515152	-0.650369	0.258998
Hp	7.29495	6.7877	7.92218	6.34989	-0.0706064	1.20982	-0.339459	-0.473252	1.06347	-0.262385	-1.13327	-0.345575	-0.324363	0.529523	0.822187	0.212465
Nkx2-1	7.33052	5.39524	5.98982	6.2972	-2.01667	0.127362	-2.01667	-2.01667	-2.01667	-2.01667	-1.50838	-1.22741	0.780608	-0.0515152	0.542103	0.789418
Ltb	7.27318	2.73777	6.4824	6.6247	-0.413542	-0.919068	-0.714852	-1.04771	0.452959	-0.541485	-1.13327	-2.01667	-0.500768	0.750792	0.194216	-0.360566
Sox11	8.42465	6.79673	11.3475	10.8199	-0.413542	-0.00232876	0.598952	0.255258	-0.817005	0.895475	2.47775	3.0764	4.49133	4.7053	4.87097	4.44508
Hoxb4	8.20271	5.99515	9.73329	9.03654	2.58225	2.53298	2.84258	2.09404	3.01062	2.91508	-1.50838	-2.01667	0.0404743	0.942594	1.02933	-0.859942
Hpgd	8.86997	12.5732	8.03712	9.45688	3.71595	5.84154	4.38468	4.7666	4.19809	3.90191	2.60696	2.0725	2.80803	3.18585	2.15672	2.6951
Baz1a	9.27876	3.68181	11.148	9.90748	4.38521	4.22133	3.50305	3.3144	4.08003	4.17508	1.40478	1.94345	1.565	1.74742	1.71767	1.37958
NA	7.01353	1.04959	9.08057	7.91239	0.813998	0.127362	1.00903	0.737046	1.29308	0.429713	1.08807	0.675177	1.49616	1.26334	1.78452	2.46635
Pax5	5.47703	3.24001	6.55682	6.30908	-2.01667	-1.2011	-1.07867	-0.473252	-0.718615	-1.8171	-1.13327	0.306708	0.277738	-1.0398	-0.0753554	-0.0457847
Slco2a1	9.91129	10.9519	12.306	11.8642	4.32847	5.88345	5.74828	5.64196	5.2382	5.55316	4.54958	3.77123	3.21028	3.06732	3.1546	4.28284
Hotairm1	6.69666	2.30287	6.82224	6.40871	0.206265	0.356267	0.0867046	0.737046	0.0681271	0.0754309	-2.01667	-2.01667	-0.409871	-0.0515152	-0.483753	-0.588754
Gpx3	12.1644	8.81338	11.5196	11.4161	4.58613	4.80477	5.48073	5.41276	5.41793	5.45167	4.14388	3.72289	3.96327	3.89164	4.58949	4.42991
Tbx2	9.65979	8.2399	9.56771	10.3086	2.90683	3.08932	3.16732	2.87682	2.67277	2.59445	-0.195312	-0.189397	4.40633	4.31229	3.50612	0.9681
Prx	9.42084	10.6308	8.97888	9.66992	3.94079	5.10163	3.65594	3.70308	3.96631	3.8515	1.71107	2.24671	0.701269	-1.0398	0.884467	0.471501
Slc17a9	5.47703	1.22055	7.39315	5.32336	-0.864286	0.458399	0.0867046	-2.01667	-0.237782	-0.327263	-0.378929	-2.01667	0.573427	0.750792	-0.564657	-0.508614
Emp2	11.776	9.41046	14.2304	13.7673	7.57765	7.38717	7.13195	7.21986	7.25626	7.48683	6.25431	6.38795	5.9428	5.92555	5.76079	6.23816
Hba-a2	8.52016	1.71596	7.4763	7.38807	-1.15654	-0.683257	2.38586	2.01179	0.410107	1.52944	-2.01667	1.09536	1.37356	1.40041	1.16097	2.14568
Jchain	6.895	6.19811	5.97827	4.716	-2.01667	0.643238	-0.946936	0.255258	-0.817005	-1.09821	-0.0324478	0.408016	0.891991	0.268059	0.653601	-0.76377
Mir6236	11.9076	7.78267	13.2543	11.4544	5.16613	5.19705	6.2544	6.30012	6.62758	5.24126	2.27491	6.17271	5.57942	5.42076	5.29877	6.43085
Atp6v1c2	5.67817	2.2512	5.06446	4.74154	-2.01667	-1.2011	-2.01667	-2.01667	-2.01667	-2.01667	-1.50838	-1.22741	0.103547	0.268059	-0.0753554	-0.588754
Adrb2	9.11504	9.76946	11.7793	10.9761	4.94809	4.75044	5.01128	5.2785	4.97521	4.71772	4.85031	4.13855	4.25481	4.22269	4.15353	4.48722
Itih4	6.38103	2.5149	6.4451	5.03958	-0.413542	0.643238	-0.110699	1.38581	0.887198	0.26342	-1.50838	-2.01667	-1.37703	-2.01667	-0.741497	-1.46965
Gramd2	7.29495	4.79509	6.50271	6.88661	-2.01667	-0.683257	-2.01667	-2.01667	-2.01667	-1.64182	0.480538	1.26699	1.83036	2.10924	1.70046	1.04977
Gata3	7.50254	6.83672	9.12689	9.07065	1.35835	3.3639	2.92228	2.62346	3.72104	3.6216	-0.589372	0.408016	1.65197	1.40041	1.47615	1.91813
Scn7a	7.98115	9.0644	7.59709	8.40525	2.65327	3.63866	2.38586	2.56697	2.00464	1.87051	2.70259	2.86104	1.44836	1.52559	1.30455	2.33133
Saa3	7.03956	1.79025	5.91096	4.29822	-1.15654	-1.2011	-0.946936	0.516171	-0.626509	-1.21613	1.08807	-1.56872	-0.409871	0.942594	0.334682	0.347789
NA	17.7665	13.2746	18.1076	17.2828	12.0413	10.9362	11.5356	11.5639	11.9458	11.021	9.77919	12.5917	11.0434	11.0519	10.5754	11.442
Atp2a3	11.6723	10.7603	12.9349	12.4083	5.72598	6.54104	6.66033	6.56096	6.26837	6.46745	5.54195	6.18347	6.37061	6.51045	6.09793	6.12416
Cfap46	5.5022	1.27331	7.17425	4.63025	-1.52343	-0.683257	-1.38484	-2.01667	-1.79992	-1.8171	-0.378929	0.0798758	1.02827	1.26334	1.59266	0.258998
NA	4.44663	7.77469	2.6237	1.45348	-0.621382	0.643238	-0.714852	-1.04771	-0.922599	-0.620596	0.480538	1.72525	0.277738	-0.462639	0.542103	1.17639
Scgb3a1	8.50623	5.72616	8.15388	7.17749	0.541898	1.89596	1.69367	1.38581	0.823308	1.13105	1.88422	1.80171	2.31644	2.26098	2.71478	3.23855
NA	7.68673	2.05421	7.32559	6.4892	-0.413542	0.458399	1.67333	1.38581	0.612674	0.578804	-0.195312	-0.0484876	1.29468	0.750792	2.27769	2.36363
Krt18	7.02226	4.6279	7.39243	7.4063	-0.413542	-0.683257	0.90824	-0.473252	0.0119157	0.506184	0.246726	0.408016	2.1321	2.74573	2.02468	2.58068
Lars2	15.3453	11.3787	15.2894	14.3583	9.54993	8.99003	9.37554	9.35312	9.91355	8.70293	7.13793	10.0775	8.05323	8.00684	7.55719	8.45392
Glb1l2	3.2114	5.47624	4.34782	5.30371	-1.52343	0.127362	-1.774	-2.01667	-0.922599	-1.48555	-1.50838	-0.345575	-0.0946006	0.750792	-0.564657	-0.360566
Hba-a1	8.44264	2.40097	7.33694	7.18467	-1.52343	0.246349	2.45895	3.05167	0.855607	1.96837	-2.01667	1.72525	2.08599	2.02693	1.89454	2.66085
Gmfg	6.71292	6.07534	6.91002	7.11385	1.70886	1.85909	1.91762	2.62346	1.29308	1.61826	-0.835841	-1.22741	0.741484	0.750792	0.617384	0.00969611
Epcam	4.64047	2.64071	3.78344	4.60265	-2.01667	-1.2011	-1.774	-2.01667	-2.01667	-1.8171	-0.589372	-0.951592	-1.37703	-2.01667	-0.407146	0.656684
Aldh1a7	5.18224	4.18705	5.07535	5.21953	-2.01667	-1.2011	-1.774	-1.04771	-1.44492	-1.48555	0.368363	0.829239	-0.243641	0.268059	-0.0753554	0.11464
Cbr2	6.3044	7.93013	7.51481	5.78769	1.17742	2.8091	2.18508	2.24569	1.24512	1.37487	1.84284	1.72525	1.84889	1.40041	0.944169	1.24735
Spn	4.87052	3.42627	5.2328	4.84123	-1.15654	-0.302987	-0.259107	-0.0634934	-0.626509	-0.541485	-1.50838	-0.189397	-0.701787	0.529523	-1.05553	-0.76377
Ccl6	7.9077	4.07263	7.92569	5.07091	2.37376	2.5562	2.25516	2.3829	1.96077	2.03441	-0.195312	-0.720139	1.58724	0.750792	1.28159	0.995841
H2-DMb1	8.26653	5.57411	8.04591	7.67914	2.76438	1.7824	0.598952	1.38581	1.68332	0.837459	3.58996	3.1659	2.08599	1.26334	2.72333	3.033
Cebpb	9.81915	5.32824	9.48317	9.33432	3.28032	3.07332	3.52023	3.75457	3.10096	2.80587	4.556	3.30374	3.91134	3.61003	4.40528	5.00167
NA	8.37271	3.7944	9.73028	9.08425	2.67619	2.68818	2.66862	2.01179	2.89882	2.79066	3.67494	3.58907	3.48949	3.7189	4.23347	4.72541
Itgal	5.45141	2.75642	3.63431	4.56573	-0.0706064	-0.480629	-1.38484	-0.473252	-1.16025	-0.704298	-2.01667	-0.520735	-0.500768	0.529523	-0.741497	-0.962986
Wdfy4	6.56548	3.49452	4.37157	4.59404	0.206265	0.246349	-0.259107	-1.04771	-1.29557	-0.989199	0.368363	-0.720139	0.659901	1.74742	0.194216	-0.962986
Cdhr3	5.97643	2.81098	5.03501	4.71004	-0.864286	-0.683257	-0.826232	-2.01667	-0.718615	-1.21613	-1.50838	-0.520735	1.32145	0.942594	0.853663	0.00969611
Il3ra	9.66885	6.45948	10.6771	9.6177	4.96214	4.88031	5.36823	5.2608	5.48914	5.15779	2.14475	2.8788	3.17401	2.84515	2.89199	3.30104
Hilpda	8.90578	9.18139	9.62365	10.0282	4.45974	5.1095	4.32402	4.56505	4.14354	4.38203	4.27411	4.15322	3.61385	3.61003	3.79262	4.47249
Dynlrb2	5.68918	3.42627	5.46584	5.18843	-2.01667	-2.01667	-2.01667	-2.01667	-2.01667	-2.01667	-1.13327	-0.189397	1.565	1.11186	0.884467	1.55766
Rtkn2	6.3674	4.89948	6.49192	7.00976	1.79514	1.85909	1.35376	1.62592	1.03554	1.2909	-0.589372	0.90051	1.49616	0.268059	1.10974	1.57616
Laptm5	9.63796	5.18068	9.22368	7.83852	1.83641	2.09934	2.11143	1.73248	2.07492	1.41509	3.62699	3.79947	4.41568	4.31229	4.63322	4.59997
Ccdc180	4.36665	1.92826	5.32997	3.43177	-1.52343	-2.01667	-1.56634	-2.01667	-1.79992	-1.48555	-0.835841	-1.22741	0.891991	0.529523	-0.0172606	-1.32535
Aard	6.3878	7.30504	5.59254	6.0803	-1.52343	0.553777	-0.826232	-1.04771	-2.01667	-1.34456	2.2113	1.94345	2.34282	2.69332	2.09221	2.0026
Cd300ld	4.66297	0.923221	5.19335	5.03958	-0.231908	0.643238	0.0867046	0.516171	0.12223	-0.140777	-2.01667	-2.01667	-0.500768	-0.0515152	-0.838771	-1.81041
Mmp3	6.31153	2.4704	4.38913	4.87713	0.728875	0.553777	0.641438	1.51085	0.224706	0.578804	-0.378929	-0.951592	-0.500768	-0.462639	-1.80527	-0.588754
Lat2	5.43843	1.99261	5.1528	5.12416	-0.864286	-0.302987	0.0867046	-0.0634934	-1.16025	-0.2003	-0.589372	-0.720139	1.15278	0.268059	0.944169	-0.588754
Hoxa7	5.65591	3.73921	5.68787	5.87016	1.83641	1.37563	0.722831	0.516171	2.53994	0.468455	-2.01667	-2.01667	-1.37703	-2.01667	-1.62093	-1.62999
Plcb2	5.31602	3.59121	4.43495	4.35023	-0.0706064	-0.14484	-0.424552	-2.01667	-1.44492	-1.48555	-1.13327	-0.0484876	1.02827	-0.462639	-0.199072	0.548449
Taf3	8.41971	5.31572	10.7021	9.81671	4.47289	4.3331	4.53027	4.4604	4.75318	4.6477	4.44285	4.51863	4.24085	4.49177	4.7756	4.78624
Gna14	4.44663	5.38927	4.11433	4.34767	-1.52343	0.643238	-1.38484	-0.0634934	-1.29557	-1.8171	0.938958	0.675177	-0.701787	-0.0515152	0.0385851	0.11464
Tmem100	7.00475	11.6419	7.77797	8.24895	2.45551	5.28307	3.86759	4.18817	3.72978	5.00146	5.89561	5.51083	4.77903	4.98143	5.2916	5.53822
Crb3	4.31076	1.99261	4.74337	4.20808	-2.01667	-1.2011	-2.01667	-2.01667	-1.79992	-1.8171	-2.01667	-0.520735	0.383179	0.529523	0.242574	0.258998
Ccdc68	4.90867	5.9714	4.32366	5.38823	0.206265	0.356267	0.415268	-1.04771	0.273337	0.26342	1.34676	0.675177	0.277738	1.26334	0.0923493	0.0631221
Pde3a	8.55516	8.3341	10.0827	10.0229	4.41276	4.96516	5.24277	5.02954	5.3287	5.72199	1.61602	2.51999	4.40945	4.02484	3.26991	2.21813
Glrx5	10.2481	7.03213	11.293	10.385	5.45825	5.79837	5.64896	5.6351	5.45133	5.09882	4.9216	5.12095	5.43055	5.32067	5.60421	5.6924
NA	3.38383	0.710121	7.23136	5.84409	-0.0706064	-1.552	-0.826232	0.255258	-0.380961	-0.793157	-0.0324478	-0.345575	2.66899	2.1871	2.02468	1.22408
Irf4	4.5944	1.51155	4.47388	3.1324	-0.621382	-0.14484	-1.38484	-1.04771	0.224706	-1.09821	-1.50838	-1.22741	-0.324363	-0.462639	-1.17748	-0.859942
Egfl6	5.28734	2.5149	4.2293	4.59188	-2.01667	-1.552	-2.01667	-2.01667	-1.79992	-2.01667	-1.13327	-0.520735	0.331422	1.52559	0.757097	0.6215
Cyp2f2	9.41918	8.55595	9.45183	8.80934	-1.52343	-0.14484	-1.56634	-1.04771	-2.01667	-2.01667	6.20005	5.76351	3.31393	3.25979	5.03268	5.6635
Arhgap45	6.96003	4.20753	7.53862	6.66479	1.91559	2.68818	1.30172	0.928552	1.73632	0.951248	0.938958	1.64451	2.92614	2.4623	2.32337	1.76534
NA	10.01	5.43051	9.86687	8.2675	3.3814	2.06738	1.88262	2.7302	2.10209	1.68558	2.24345	4.00748	6.27966	6.32914	4.94041	1.94684
Shroom3	7.92409	8.48188	7.96916	8.50412	4.26186	4.41159	3.82214	3.96592	4.27175	3.88768	2.50454	2.2191	1.8116	2.1871	1.81682	2.22986
BC005561	5.42533	2.71887	7.28473	6.13173	0.970512	0.643238	1.21998	1.51085	0.978023	1.511	1.01544	0.591502	1.67291	1.40041	1.62949	2.26448
Hoxb5	5.85467	5.97339	6.20013	6.65965	1.61709	2.24935	2.30887	2.31592	2.81917	2.04727	-2.01667	-2.01667	0.85581	-1.0398	0.723417	-1.32535
2310033P09Rik	8.46682	4.86121	10.1306	9.49123	4.29184	4.2783	4.53591	4.71555	4.33897	4.13048	4.2663	3.90722	4.18726	3.93742	4.44715	4.6791
Runx1	5.35799	3.39089	4.98198	4.18248	-0.231908	-0.302987	-0.0418523	0.255258	-0.237782	-0.262385	-0.0324478	-0.720139	0.659901	-0.0515152	0.580235	0.11464
NA	7.84267	3.27924	7.83675	7.11196	1.41394	2.24935	2.03381	1.62592	1.77061	1.4734	2.11029	1.87432	3.10633	2.69332	3.61574	3.47374
Chchd2	10.5842	6.63731	11.8892	10.8036	5.51972	5.67121	5.88275	5.75372	5.59696	5.05654	5.61444	5.44977	6.29071	6.29438	6.77199	7.19524
Gprc5a	7.4224	6.82462	7.47356	7.39582	3.39528	2.92066	2.8874	2.87682	2.25522	3.02962	2.85605	2.84306	0.818699	1.64076	1.98259	2.72855
Ankrd63	7.50566	7.2955	8.2619	9.24554	-0.621382	0.246349	-0.110699	-0.473252	-0.458258	-0.887851	3.01352	3.71303	4.88605	5.01385	4.72117	5.05868
Cd52	5.89324	3.43787	4.77934	3.97618	0.0744609	0.127362	-0.259107	-0.0634934	-0.718615	-0.793157	-0.589372	-0.345575	1.37356	0.529523	1.0015	0.9681
Ptpn7	4.44663	2.11329	5.46308	4.43936	-0.413542	0.882489	0.260319	0.928552	-0.718615	-0.2003	-1.50838	-0.951592	0.659901	-1.0398	-0.265151	0.258998
St14	6.70752	3.67202	6.41112	5.37197	1.24029	1.42692	1.07251	0.928552	1.29308	0.777012	1.2863	1.83847	1.23958	0.529523	1.81682	1.84376
Psmd1	10.4023	6.89365	12.1296	10.838	6.11158	6.22515	6.44035	6.58249	6.52713	6.44881	6.11353	6.33587	5.91779	5.74425	6.27474	6.58776
Cd72	5.74296	0.365959	2.89357	3.49782	-1.15654	0.458399	-0.714852	0.255258	-0.626509	-1.48555	-0.195312	-0.0484876	0.433144	-1.0398	-0.135888	0.164382
Adam33	4.90867	1.79025	6.93316	5.96578	0.327029	0.954167	0.146928	0.255258	0.612674	-0.262385	-0.589372	0.591502	2.89082	2.63894	1.28159	0.548449
Tnfrsf13b	4.96407	3.32993	4.1491	4.76281	-0.0706064	-0.00232876	-1.22365	-0.473252	-0.718615	-0.620596	-0.378929	-0.189397	0.659901	0.942594	0.617384	-0.226307
Sec62	12.5006	9.85307	14.5581	13.9092	8.45569	8.5552	8.65687	8.61843	8.83765	8.62657	8.97149	8.66869	9.00663	8.97287	9.25403	9.86046
NA	8.93611	4.54449	8.73285	8.51769	3.17163	3.38998	3.48566	3.67663	3.14082	2.61186	3.33034	3.25018	4.40633	4.04589	4.52252	4.79021
Slamf9	5.35799	0.631468	4.47388	4.08455	0.0744609	0.246349	0.598952	0.255258	-0.626509	-0.2003	-1.50838	-0.951592	0.103547	0.750792	-0.135888	-0.432692
Pirb	4.77047	1.37337	4.18976	2.87274	0.0744609	0.246349	-0.259107	-0.473252	-0.922599	-0.793157	-1.50838	-1.22741	-0.167197	-2.01667	0.334682	-1.32535
Krtcap3	5.25809	1.04959	3.7108	3.62148	-1.52343	-0.919068	-2.01667	-1.04771	-1.03654	-1.64182	-2.01667	-1.22741	1.06042	0.942594	0.757097	-0.291875
Mfap2	6.03797	8.75371	6.67965	5.72505	1.66371	2.48539	2.21352	2.24569	2.58879	2.24989	4.10064	3.59981	2.83616	2.4623	2.78177	3.25586
NA	5.5022	3.67202	7.18686	6.17275	1.1117	0.643238	0.873016	1.24888	0.855607	1.10669	2.47775	2.37737	1.73399	1.52559	2.15672	2.05629
Amer1	7.82782	5.72379	10.1652	9.77528	4.28441	4.57965	4.84627	4.90974	5.04164	4.92865	3.52603	4.36961	4.71483	4.59536	4.68882	5.0271
Rps10	7.19429	2.66065	6.9985	6.42638	1.51909	1.82125	1.45251	1.62592	0.887198	0.837459	1.2232	1.83847	2.7599	2.8924	2.68884	2.86266
Inmt	7.49316	7.63489	8.17597	8.40017	0.638414	1.85909	1.21998	1.62592	1.33949	1.08192	5.58337	4.00748	3.10633	3.14741	4.57776	4.00424
Arl4d	10.6377	10.1304	11.3404	11.5486	7.00988	6.76434	6.88138	6.89796	6.81633	6.64071	6.70906	6.52253	5.56968	5.49152	6.22446	6.62654
Fam46c	6.95548	3.60156	7.2134	6.77259	1.61709	1.65913	2.3983	1.73248	2.07492	2.72818	3.18889	2.51999	1.51947	1.40041	1.61119	2.79322
Frrs1	6.95092	3.49452	7.86161	7.44419	2.02675	2.78963	3.49728	3.85234	2.96693	3.65137	1.34676	1.51424	2.11689	1.93964	1.87932	1.37958
Myo1g	4.64047	2.30287	3.4232	2.0267	-0.621382	0.127362	-0.339459	-2.01667	-0.817005	-0.989199	-1.50838	-2.01667	0.433144	-0.0515152	-1.17748	-1.62999
H2-Ab1	8.39975	8.58396	8.23706	8.12306	5.29016	4.69398	4.00002	3.77964	3.98832	3.48184	3.86261	3.10686	3.35987	3.42959	3.38209	2.99913
Cfd	5.01743	4.53372	4.63958	2.61658	0.638414	0.127362	1.37908	1.83172	1.33949	0.218669	-2.01667	-2.01667	-2.01667	-2.01667	-2.01667	-2.01667
Ralbp1	10.1931	8.22617	12.852	12.2528	7.4363	7.59625	7.58632	7.59482	7.96873	7.79425	7.14964	7.15027	6.62018	6.44063	6.92752	7.22814
Lrrc71	4.90867	1.10886	3.10673	2.19543	-1.52343	-1.2011	-1.56634	-2.01667	-1.44492	-1.8171	-0.835841	-0.189397	0.818699	0.268059	-0.199072	-1.07396
Rps24	9.41836	5.65089	9.64771	9.65946	4.19995	4.26427	4.36896	4.16932	4.01359	3.81814	4.33506	4.2722	5.72316	5.63039	5.65534	5.41777
Ccdc85b	11.3072	7.57966	12.0455	11.4412	5.79042	6.76932	7.72118	7.6621	7.28693	6.98267	4.81329	5.83802	6.66399	6.46428	7.19123	7.13219
Eif5b	11.4925	9.09884	13.4151	12.8202	7.76702	7.79417	8.04994	8.17563	8.13338	7.74159	7.10986	7.30029	8.15653	8.11289	8.24204	9.05975
Gm13889	8.08685	6.86708	8.37273	8.54779	1.30053	1.96699	2.30887	1.24888	1.38446	1.54765	2.0388	3.01349	4.96034	5.22238	5.1194	4.8408
Ccar1	8.80191	6.5558	11.6234	11.001	5.96108	6.25916	5.85819	5.88659	6.18265	5.79335	6.00517	5.9989	6.30588	6.12667	6.42701	6.79094
Cybb	6.08037	1.82601	5.79496	4.17961	1.30053	1.32245	1.00903	1.09759	0.686355	1.05672	-0.378929	-0.189397	1.42386	1.93964	-0.0753554	-0.103485
Hsp90aa1	9.42824	5.96138	11.2172	10.5965	5.04811	4.89859	4.61266	4.53592	4.83645	4.75345	5.83095	5.98667	6.37701	6.57704	6.57539	7.13765
Rps18	9.30403	5.62828	10.0611	9.4481	4.65119	5.03707	4.89318	4.79147	4.44095	4.35126	4.71352	4.46674	5.41665	5.29452	5.39149	5.34279
Ly6g6d	5.42533	2.64071	5.23927	5.06626	1.30053	1.08765	1.32797	1.24888	0.365942	1.13105	-2.01667	0.197745	0.927286	0.268059	0.0385851	0.11464
Ehd4	11.0164	11.9311	11.4053	11.8103	7.75832	7.91977	7.97249	7.9691	8.17817	7.71566	6.66966	7.05098	5.41043	5.33784	5.62146	5.9631
Rplp1	11.1799	7.0643	11.4518	10.2717	6.084	6.37305	6.44934	6.66217	6.14884	5.8577	5.51915	5.47334	6.62085	6.60568	6.84575	7.0986
Inpp5d	8.77892	7.85585	9.3505	8.86649	5.24105	5.1822	5.06884	4.95447	5.34586	5.11417	3.28471	3.62107	3.57544	3.55236	3.48617	3.18533
Mapk13	4.02839	1.63764	2.97336	2.10144	-1.52343	-2.01667	-2.01667	-2.01667	-1.44492	-2.01667	-0.589372	-0.345575	-0.597779	-0.0515152	-0.265151	-0.962986
Pttg1	9.57262	8.12079	11.0045	10.2349	5.70385	5.41594	5.82516	5.74738	6.287	5.05335	6.37534	5.22874	5.56968	5.58077	6.26234	5.93202
Cyp2s1	6.75017	3.94021	6.91609	5.63567	-1.52343	0.458399	0.761868	0.255258	0.0119157	0.542951	3.56473	2.93079	2.14715	1.84673	2.27769	2.99226
Rhoh	3.95736	0.548279	4.86969	2.94217	-0.413542	-0.683257	-0.259107	0.255258	-0.539932	0.26342	-1.13327	-0.720139	-0.167197	-0.462639	-0.0172606	-0.226307
Myl6	11.7931	8.52331	11.7032	11.2062	7.15968	7.12424	6.89407	6.85142	6.77366	6.42684	7.48752	7.25086	6.87698	6.89678	6.97615	7.1006
NA	4.47233	-0.0869132	4.16278	3.42693	-2.01667	-0.683257	-0.946936	-0.473252	-0.922599	-1.64182	-1.13327	-0.520735	-0.243641	0.268059	1.0015	0.431431
Mettl24	2.70458	4.01957	3.21574	4.38555	-1.52343	1.26723	-0.110699	0.255258	-1.03654	-0.083612	-0.378929	-0.951592	-0.167197	-2.01667	-0.407146	-0.76377
Irx1	5.41211	2.81098	5.03873	4.4866	-0.621382	-0.302987	0.0238576	-0.473252	-0.458258	-1.09821	-0.835841	0.408016	1.39893	1.52559	1.95383	1.12707
Tcof1	8.70902	4.72105	9.8184	8.71765	4.68548	4.61877	4.68806	4.7666	4.31013	4.53587	4.31251	4.2519	4.58271	4.34663	4.74655	5.00338
Rubcnl	4.09609	1.22055	3.87769	2.90092	-0.413542	-1.2011	-0.946936	-2.01667	-1.03654	-1.64182	-1.13327	-0.189397	0.383179	-0.462639	0.144182	-0.588754
Erich2	4.5944	2.73777	4.7158	4.69604	-0.621382	-0.14484	0.0238576	-0.473252	-0.922599	-0.083612	-0.0324478	0.0798758	1.32145	-0.0515152	1.0015	1.17639
Vav1	6.16949	2.2512	4.77489	4.60906	0.728875	0.246349	-0.611457	1.51085	-0.237782	-0.704298	-0.378929	-0.0484876	1.73399	1.52559	1.66541	1.68241
Ptpru	8.63556	7.36324	9.74981	8.63135	3.07146	3.3639	2.71909	2.7302	3.17961	3.00348	5.87009	5.16504	5.14032	5.24986	5.38073	5.40877
Lyz2	8.61408	8.09766	9.23303	7.61362	4.60416	5.17846	5.11856	5.06056	4.26875	4.35385	2.00168	2.89634	4.20174	4.31229	4.03154	3.13008
Chil1	6.62399	5.775	6.80162	4.25248	-1.52343	1.93191	-1.774	-2.01667	-2.01667	-1.8171	1.15722	2.00941	3.18134	2.8924	3.56435	3.04633
Sh2d4a	5.01743	2.37706	3.17582	4.26879	-0.0706064	0.807063	1.47618	0.737046	0.224706	0.647943	-0.378929	-1.56872	-1.56043	-2.01667	-1.05553	-1.19419
Upf3b	8.07432	5.22823	10.3537	9.58062	4.28441	4.10017	4.33377	4.24328	4.14354	4.01746	4.7698	4.89965	5.86643	5.76978	5.72826	6.02667
NA	7.37889	3.61184	8.18354	7.36297	3.18767	3.15163	3.33201	3.09226	2.67277	2.93597	2.42265	2.71052	3.35339	3.2233	3.63851	3.64119
Foxp1	11.3606	9.13203	12.1528	12.422	6.95705	7.29701	7.27586	7.21067	7.36439	7.5785	7.4892	7.94554	7.56123	7.5292	7.54126	8.1712
Scnn1a	5.64466	4.94491	5.1286	4.75704	0.43846	0.458399	0.415268	1.09759	0.273337	0.542951	1.2863	0.591502	0.891991	1.74742	1.92449	1.8129
Rtf1	9.70114	6.422	11.6342	11.0344	6.59914	6.58545	6.4568	6.63151	6.7149	6.67217	6.11135	6.12887	6.12104	6.03488	6.34564	6.77001
H2-Aa	8.57012	9.08415	8.07965	8.08884	5.19815	4.79991	4.20513	4.15023	3.95889	3.84783	5.00368	4.24507	4.06977	3.98179	4.32052	4.12535
Il21r	4.81133	2.08405	4.85291	4.48428	-1.15654	-0.919068	-0.611457	-0.473252	-1.16025	-1.8171	0.772638	0.591502	1.26739	1.11186	0.853663	1.37958
NA	7.03525	3.7108	6.22153	5.73193	1.79514	2.68818	2.12646	1.51085	1.68332	1.03106	2.07499	1.80171	2.16204	1.11186	2.66242	2.33133
Cfap126	5.51463	2.75642	6.31638	5.70821	-1.15654	-1.2011	-0.0418523	-0.0634934	-0.458258	-0.327263	1.61602	1.60238	2.69993	2.4623	2.28924	2.46635
Amotl1	11.2561	8.74293	12.8912	12.549	8.42558	8.60615	8.31155	8.33951	8.23548	8.35011	7.24703	7.19171	7.07635	7.06347	7.09038	7.30153
Clic3	4.44663	3.72033	4.63468	4.19107	-2.01667	-1.552	-2.01667	-2.01667	-2.01667	-1.21613	0.858194	1.03329	1.21122	1.40041	0.853663	0.910963
NA	5.82505	2.08405	5.33903	4.85569	0.43846	0.127362	0.510031	0.255258	0.365942	-0.2003	0.480538	1.21202	1.34774	1.93964	1.84841	1.51994
Sell	2.18866	2.1976	1.82509	2.92855	-2.01667	-1.552	-0.714852	-2.01667	-2.01667	-1.8171	-2.01667	-0.951592	-0.409871	-1.0398	-1.80527	-0.67361
Dennd1c	4.49759	0.548279	3.48984	3.10239	-0.413542	-0.00232876	-1.56634	-1.04771	-1.03654	-1.48555	-1.13327	-1.22741	0.433144	0.529523	0.0923493	-0.432692
Frg1	10.1188	7.82636	10.5261	10.1626	6.04271	6.10629	6.06254	6.16394	6.34929	5.88927	5.78253	5.60718	5.36288	5.04555	5.86583	5.77677
Spint1	4.92738	2.37706	4.10727	2.93537	-1.52343	-0.919068	-1.56634	-2.01667	-1.29557	-1.21613	-0.835841	-0.520735	1.23958	0.529523	1.13558	1.20043
Fgr	3.8438	0.784707	2.54232	3.23556	-1.15654	-0.14484	-1.07867	-0.473252	-0.922599	-1.21613	-0.835841	-0.520735	-0.597779	-1.0398	-0.943081	-1.07396
Rps9	11.8072	8.69176	12.8752	12.0635	7.96146	8.04611	8.22994	8.22667	7.93983	7.95016	7.54187	7.42865	7.61262	7.69162	7.81751	7.95262
Cd27	3.92049	3.68181	3.63431	2.87274	0.327029	0.246349	1.00903	0.516171	0.12223	0.0243403	-1.13327	-0.951592	-1.56043	-2.01667	-1.62093	-1.07396
Adrb1	5.31602	7.55656	6.26181	6.83141	2.06198	3.19666	2.21352	2.24569	1.6283	0.777012	1.80024	2.51999	3.09861	3.06732	3.64752	3.44384
Cd2	4.33898	2.14195	4.78819	4.11193	0.327029	0.246349	0.555176	0.737046	-0.107538	0.124774	0.113882	0.0798758	-0.0946006	-0.0515152	-0.334402	0.431431
NA	9.1048	4.40959	9.31801	8.40939	3.90243	4.3794	4.40331	4.88685	3.97	3.88411	3.78827	4.2789	4.85202	4.93705	5.06833	5.31002
Hck	5.24323	2.44763	3.97395	3.52974	-0.231908	-0.919068	-0.611457	-2.01667	-0.626509	-0.989199	0.113882	0.197745	1.23958	1.26334	0.542103	1.04977
Luc7l3	10.283	7.74989	12.0857	11.5006	6.1913	6.65028	6.40918	6.49815	6.55813	6.45123	7.04178	6.96424	7.84925	7.88655	7.44542	7.53452
Dync1i2	10.961	8.44318	12.6566	11.545	7.68253	7.65591	7.31903	7.29569	7.70823	7.49007	7.54429	7.57402	7.45829	7.49707	7.53673	7.33585
Lbx2	5.10219	3.2267	4.86552	3.91879	1.35835	1.37563	1.24774	1.51085	1.38446	1.247	-1.13327	-2.01667	-0.500768	-1.0398	-1.3107	-1.07396
Cyp1a1	6.08037	7.56254	5.81025	6.94274	1.66371	4.95646	3.77998	3.41383	3.40367	3.59121	-2.01667	-2.01667	-1.77059	-0.462639	-1.45749	-1.46965
Zbtb20	10.2109	7.59658	12.4581	11.898	7.25028	7.28663	7.40053	7.48097	7.56511	7.48948	6.77791	7.00826	7.81932	7.80709	7.63652	6.93985
Rps21	10.8943	6.87457	10.5562	10.4724	5.82927	6.41016	6.07131	6.03973	5.59935	5.67618	6.08275	5.99076	6.66137	6.61627	6.8166	7.02814
Colq	4.31076	1.82601	4.33579	4.27956	-0.231908	-0.919068	0.598952	-1.04771	-0.107538	-0.083612	-1.50838	-2.01667	1.12264	-0.0515152	1.25826	0.85147
Sash3	4.06264	2.32802	3.57415	3.41232	-2.01667	-1.552	-0.611457	-0.473252	-0.817005	-0.989199	-1.13327	0.0798758	0.103547	0.750792	0.194216	0.11464
Ptprc	6.07199	3.89041	4.45733	3.91188	2.16278	2.43617	1.16279	-1.04771	0.410107	0.578804	-1.13327	0.829239	1.15278	1.26334	0.790009	-0.226307
Akr1c13	4.49759	2.86354	4.48482	4.84486	-0.621382	0.246349	0.313839	1.09759	0.0119157	-1.09821	1.66433	0.591502	0.163978	0.529523	0.723417	0.431431
Wdr89	11.7138	8.31967	11.4319	11.3354	6.72536	7.16635	7.64623	7.54085	7.10578	7.27607	6.32363	6.69155	7.28291	7.14133	7.54066	7.57273
Dyrk2	7.74325	6.7287	9.11506	9.60009	4.45313	4.52773	4.90194	4.75401	4.78916	4.99152	4.10064	4.28557	4.9518	5.19438	4.95137	4.97055
Gpnmb	4.87052	5.10992	4.77934	1.11165	-0.413542	0.356267	0.204737	-0.473252	-0.718615	-0.620596	-0.835841	-0.345575	1.9723	1.74742	2.18174	0.347789
NA	5.03478	2.08405	5.29313	4.91733	1.61709	1.65913	1.32797	1.51085	1.03554	0.866759	0.113882	0.90051	-0.500768	-0.462639	0.0923493	0.69103
Gm16023	1.37794	0.365959	5.04981	3.87685	-0.231908	0.127362	-0.611457	-2.01667	-0.817005	-1.34456	-0.0324478	-0.520735	1.32145	0.268059	0.462676	-0.508614
Nckap5	4.31076	5.82003	5.1286	6.33577	1.1117	2.03468	1.30172	2.01179	0.855607	1.10669	1.75634	2.37737	1.9891	1.74742	1.70046	1.84376
S100a16	12.453	10.2649	12.6347	12.5724	8.90968	9.22664	9.05492	8.99003	8.85048	8.7834	7.18215	7.46216	6.86394	6.81942	7.03268	7.10935
Ptafr	5.16658	-0.553992	3.47894	3.21327	-0.621382	-0.00232876	0.146928	-0.0634934	0.224706	-0.395196	-0.589372	-0.720139	0.481437	1.11186	0.242574	-0.103485
Retnlg	2.94385	1.86091	4.09305	2.31541	-2.01667	-2.01667	-1.774	-2.01667	-1.79992	-1.8171	-1.13327	0.306708	-0.243641	-0.462639	0.914627	-0.163589
Chd7	9.04075	5.26126	10.1673	9.35881	5.38014	5.21904	4.95975	5.03996	5.23359	4.93385	4.64896	4.60117	5.92108	6.02961	5.66535	5.25799
Anp32a	12.3043	10.8995	12.9445	13.2847	8.91571	9.08539	9.1383	9.11903	9.21625	9.03541	8.08547	8.23037	7.91391	7.95214	8.25093	8.48759
Hoxa4	5.24323	5.12076	4.39494	5.62937	1.56892	1.74247	2.24141	2.7302	1.83682	1.91327	-2.01667	-2.01667	0.221979	0.750792	0.853663	-1.07396
Vangl2	7.29495	4.69228	8.54845	7.92187	3.50175	3.29656	3.61921	3.24408	3.78533	4.04975	3.96258	4.31848	3.72333	3.82013	3.67421	3.8264
Rpp25l	9.05144	6.71684	9.53554	9.37953	5.06557	5.06971	5.00925	5.09092	5.0434	4.66865	5.50595	4.94249	5.02897	5.08676	5.42462	5.35355
Hopx	8.99825	9.6842	9.34695	9.62781	5.35196	5.90622	6.17075	6.20616	5.64972	5.14589	4.47028	4.59581	5.38843	5.37158	6.04096	5.57891
Zfhx3	8.22367	6.46799	9.14013	9.009	4.19995	4.55104	4.76454	4.93228	4.95299	4.63924	4.0651	4.1605	5.07887	4.83189	4.87289	4.49696
Tox2	8.04464	8.2428	8.70039	8.51911	4.59216	4.98241	4.93434	5.06056	5.0434	4.78449	2.85605	3.23647	4.36188	4.34663	4.53471	4.50664
Zfp524	6.93252	3.82123	6.532	6.84779	2.82716	3.22591	3.34493	2.7302	2.95952	2.88676	1.88422	2.0725	2.28957	2.79629	1.92449	2.05629
Abcc3	2.86842	4.53912	3.20256	3.69974	0.43846	0.643238	0.260319	-0.0634934	-0.626509	-0.793157	0.584616	-0.720139	-0.167197	0.268059	0.144182	0.69103
Rpsa	4.49759	1.32421	5.94698	4.79506	0.638414	-0.00232876	0.463427	1.51085	0.574372	0.745811	0.938958	1.15487	1.37356	1.40041	1.3494	2.04305
Ly6i	4.70694	0.784707	3.79226	1.22742	0.43846	0.356267	0.146928	-0.0634934	0.574372	0.578804	-0.589372	-0.345575	-1.21434	-1.0398	-1.80527	-0.360566
Psmb10	11.2531	9.67427	11.986	11.1531	8.01749	8.08854	7.82246	7.79099	7.93346	7.25441	7.04178	6.76142	6.94044	6.87341	6.95816	7.13998
Fam124a	7.40248	6.03198	9.26032	8.895	4.57398	4.79015	5.09964	4.99784	4.70302	5.16518	3.33034	3.3298	4.54344	4.42906	4.5564	4.73161
S100a6	11.0893	7.0699	11.1837	11.6284	7.38332	7.34779	7.66372	7.63316	7.28397	7.00302	6.84625	6.30008	6.37381	6.56251	7.5536	7.33313
Pcdhgc4	3.2712	-0.0869132	5.47135	4.21089	-0.864286	-0.683257	-0.714852	-2.01667	-1.29557	-0.083612	0.246726	0.408016	2.00571	2.1871	0.914627	-0.360566
Egfl7	12.7798	10.7946	13.2277	12.4098	9.37232	9.80831	9.49855	9.52929	9.31456	8.95083	7.58485	8.22561	7.65205	7.62673	7.01016	7.05022
Lrrc23	5.47703	2.97922	5.28063	4.97644	-2.01667	-2.01667	-2.01667	-2.01667	-1.79992	-1.64182	1.34676	1.21202	2.7599	2.74573	2.30071	1.76534
Psd4	3.99332	1.86091	2.5631	2.40666	0.206265	-0.480629	-1.07867	-2.01667	-0.817005	-1.34456	-0.195312	-1.56872	-0.0254829	-0.462639	-0.0753554	-0.360566
Pde9a	7.19815	7.24604	8.01088	7.78615	3.56451	3.377	3.64554	3.89885	4.00642	3.80306	2.50454	2.91367	4.56601	4.41294	4.43159	3.96267
Piezo2	4.77047	5.48185	5.93108	6.06404	2.31656	2.09934	2.32199	2.09404	1.6283	1.89915	2.11029	2.0413	1.12264	2.02693	1.51604	1.69938
Sox4	9.59984	5.63837	10.3998	10.0396	6.18931	6.82654	6.6382	6.45211	6.87905	6.4835	4.90159	4.9676	4.2755	4.52213	4.21844	4.88968
Dnah10	3.08382	3.02609	4.30528	3.39757	-1.15654	-0.919068	-1.774	-2.01667	-1.79992	-1.48555	0.113882	-0.520735	1.29468	1.74742	0.242574	-1.46965
S100a9	6.29722	4.05013	6.24583	7.36676	-0.413542	-0.683257	-0.259107	-0.0634934	-1.03654	-0.541485	1.46056	3.64202	3.43536	3.42959	4.5754	3.68018
Phf14	8.75687	6.54913	10.8624	10.085	6.10103	6.06034	6.28236	6.40857	6.18742	5.9615	5.62363	5.71491	6.0785	5.97578	6.04267	6.0055
Ccdc34	6.98703	4.51193	9.29374	9.05957	3.91211	4.12368	4.47261	4.79147	4.25973	4.23249	4.25846	4.26547	4.73986	4.91433	5.27862	5.596
Tbx5	4.85106	3.08631	4.7926	5.60281	1.17742	1.82125	2.41063	2.7302	1.80409	2.31511	-2.01667	-2.01667	-2.01667	-2.01667	-1.62093	-2.01667
Ccdc22	5.16658	1.71596	5.12511	4.84848	-0.231908	0.882489	0.722831	0.516171	0.649985	-0.2003	0.113882	0.0798758	1.565	1.84673	1.93924	1.94684
Card9	4.70694	0.923221	4.59487	3.86974	-0.864286	-0.480629	-1.07867	0.255258	-0.817005	-1.48555	-0.378929	-0.520735	1.44836	2.10924	1.10974	0.757362
Hoxa3	4.09609	4.7815	4.78377	5.8157	1.83641	1.61558	2.33499	2.4469	2.33756	2.74405	-2.01667	-1.22741	-0.409871	-2.01667	-1.17748	-1.32535
Pard6b	4.33898	4.04255	4.84869	5.18557	0.43846	0.127362	0.0238576	-1.04771	0.12223	0.26342	1.56604	1.64451	1.1823	1.74742	1.66541	1.73273
Rps26	8.91284	5.94318	9.65529	9.17537	4.89535	5.14822	5.3249	5.49832	4.87832	5.10191	4.51048	4.93826	5.37252	5.37158	5.53794	5.75867
Tmem256	10.273	6.64359	10.5541	10.0041	6.15301	6.51609	6.37733	6.43248	5.91406	5.84211	6.09161	5.74426	6.25643	6.12172	6.44197	6.7685
NA	5.90273	2.1976	5.55931	4.89824	1.61709	1.37563	1.45251	1.51085	1.03554	1.00495	1.01544	1.37103	1.93811	1.52559	1.87932	2.24149
Nup210	6.68572	5.81559	7.457	6.48688	2.92608	2.22057	1.88262	2.01179	1.97555	2.08515	2.60696	2.86104	4.08548	3.98179	4.23048	3.24435
Tnfsf13b	4.44663	2.68032	2.87706	3.1324	-0.413542	0.246349	-1.07867	0.255258	-0.922599	-0.327263	-1.13327	-0.189397	1.02827	-0.0515152	0.542103	0.212465
Tspan32	4.5468	0.459997	2.77388	2.1609	-1.15654	-0.480629	0.365445	0.516171	-0.718615	-0.541485	-0.378929	-0.951592	0.331422	0.268059	-1.17748	-0.859942
Myo5c	4.06264	5.05824	2.92602	2.29432	0.206265	1.26723	-0.714852	-0.0634934	-0.237782	-0.466487	0.772638	0.829239	0.433144	1.64076	0.42126	-0.588754
Atg101	9.63013	7.09851	9.8309	9.23425	5.89912	5.73365	5.50394	5.5575	5.84837	5.38489	5.35959	5.53902	5.48338	5.37989	5.76804	5.91214
C3	8.40643	6.36388	8.04221	7.53209	4.59216	5.08974	5.03737	5.13044	5.2849	5.12179	-0.835841	-0.345575	2.00571	1.84673	1.76809	0.00969611
Lck	4.25261	2.44763	4.89859	4.0218	-0.413542	-0.14484	0.146928	0.737046	-0.458258	-0.395196	0.113882	0.306708	1.06042	2.26098	0.37862	0.471501
Casz1	6.90447	7.41918	7.88707	7.96421	4.86575	4.95209	4.59655	4.64908	5.18358	5.1384	0.480538	0.306708	1.47246	0.529523	0.853663	0.85147
NA	7.85738	4.48981	8.64512	7.91929	3.63639	3.86007	4.13994	4.09137	3.64915	3.74902	2.95646	3.10686	4.78144	4.69201	4.68006	5.19655
Lpxn	4.33898	-0.380947	2.71938	2.61658	-1.52343	-0.480629	0.0867046	-2.01667	-1.29557	-0.620596	0.246726	-0.720139	0.617312	-0.0515152	-0.0753554	-0.432692
Ppp1r12a	8.63272	6.18955	11.0531	10.6405	6.83634	6.51016	6.4313	6.40857	6.83164	6.74499	6.15638	6.28518	6.29916	6.37144	5.90392	5.96222
Cebpd	7.88396	8.64373	8.24753	9.2402	5.33405	4.63522	4.99294	5.05029	5.94253	5.57995	4.37189	4.23132	4.04588	3.93742	5.23297	5.16636
Lgals3	6.80177	4.13097	5.80372	3.88392	0.327029	1.85909	0.90824	1.83172	1.36215	1.82645	2.79227	2.54244	2.32969	2.10924	2.43162	2.74499
Usf1	9.87622	7.50303	10.3607	9.96397	6.19527	6.5425	6.11342	6.24268	6.34218	5.99257	5.81499	5.69249	6.0785	6.00294	6.21843	6.41295
Ccl9	5.37171	1.27331	4.40073	2.5017	0.813998	0.882489	1.16279	0.255258	0.452959	1.03106	-1.50838	-0.720139	0.701269	1.40041	0.580235	0.69103
Srek1ip1	8.22367	5.4276	10.0573	9.22427	4.81503	4.59094	4.77888	4.96543	4.84049	4.78832	5.1165	5.04828	5.7894	5.82562	6.11427	6.39027
Ankrd44	7.64213	6.9362	9.13103	9.2958	5.40093	5.25141	5.58373	5.6351	5.61947	5.74486	3.96258	3.74242	4.48246	4.42906	3.80072	3.4688
Ace	9.355	11.2711	9.96687	9.96345	7.0641	7.30131	6.65061	6.68557	7.65732	7.08439	7.07343	6.71027	5.21363	5.27682	5.99847	6.25188
NA	4.5224	0.855625	6.12874	4.6758	1.04283	0.356267	1.42845	1.73248	0.452959	0.951248	-0.0324478	0.197745	1.9723	1.93964	1.76809	2.34218
Trir	10.0106	7.42648	10.7052	9.95229	6.24785	6.51165	6.77329	6.76304	6.41646	6.19021	5.52243	5.83575	5.99571	6.04537	6.67841	6.55025
Ptx3	5.01743	3.27924	1.68042	3.68362	-0.231908	1.32245	1.40398	0.255258	0.612674	1.4734	-1.50838	-1.56872	0.103547	0.529523	0.0923493	-1.19419
Cfap100	5.13474	1.92826	5.58747	4.11494	-2.01667	-1.552	-1.56634	-0.473252	-1.79992	-2.01667	1.01544	1.03329	2.63737	2.98251	2.06558	1.33684
Dnah6	6.14572	2.96325	5.90283	4.50508	0.638414	1.20982	0.722831	0.255258	0.823308	0.807552	2.42265	2.32652	2.89973	2.63894	2.07896	1.46145
Tspan8	7.11084	8.14311	6.82547	7.58514	2.22627	3.67093	2.26877	2.17185	2.55968	1.8849	5.50595	5.19014	3.46568	3.63803	3.96825	4.76625
Napsa	4.33898	4.96509	4.98198	4.61758	-1.52343	-0.480629	-1.774	-2.01667	-2.01667	-1.34456	2.2113	3.09171	1.02827	1.40041	1.78452	2.25303
Ccr2	4.09609	2.79302	4.1491	4.16517	0.813998	0.553777	0.146928	0.737046	-0.107538	0.124774	-0.589372	-0.951592	0.961739	1.64076	-0.0753554	-0.588754
Alox5ap	4.85106	4.47299	4.54873	4.19391	0.970512	1.20982	1.19166	1.62592	0.721832	0.389902	0.584616	0.675177	0.995387	0.750792	1.57388	1.35837
Ncf2	4.85106	1.37337	5.50932	4.46554	1.30053	1.20982	1.16279	1.24888	0.756456	1.39512	-0.0324478	0.0798758	1.90308	1.40041	1.18591	0.757362
Scand1	7.95405	4.55519	9.38629	9.23061	2.42877	3.10515	5.48948	5.74102	4.29254	3.89125	1.96358	3.12185	5.24194	5.1754	6.37915	6.26191
Siglece	2.78883	0.0403116	1.51962	1.37531	-1.15654	-1.2011	-0.611457	-2.01667	-1.16025	-1.34456	-2.01667	-2.01667	-0.935421	-2.01667	-1.17748	-1.46965
NA	7.44204	4.39776	7.90244	7.6024	3.52718	3.81265	3.81752	3.85234	2.85156	3.28428	2.93693	3.15137	3.94617	3.74488	4.46254	4.55172
Nfkbia	11.4997	10.4922	12.5824	11.6979	8.79952	8.26802	7.94757	7.97182	8.65844	8.24403	8.88432	8.43213	7.2082	7.24053	7.89897	7.81365
Tmem2	9.26687	9.83152	10.1208	10.3373	7.03225	7.03098	6.99428	6.98407	7.49251	7.40961	4.556	4.76768	4.51182	4.44499	4.71262	4.64008
Tet3	8.3964	7.6011	9.81272	10.0576	6.23247	5.64978	5.76278	5.56473	6.26236	6.09593	4.90159	5.2218	5.94064	5.93122	5.50363	5.14483
Arf5	11.5058	7.91412	12.0652	11.1475	7.60851	7.7407	7.78416	7.6621	7.64928	7.44919	6.9522	7.12353	7.82372	7.92541	8.07745	8.17822
Tjp3	3.32861	1.16578	3.36522	1.63216	-2.01667	-2.01667	-2.01667	-2.01667	-2.01667	-1.8171	-0.589372	-0.189397	0.617312	-0.0515152	0.194216	-0.226307
Hvcn1	5.31602	2.35275	4.44058	3.97287	0.43846	0.356267	0.83691	0.737046	0.574372	0.923631	0.584616	0.675177	1.15278	1.74742	1.05664	1.17639
Dram1	7.21347	5.15631	6.47145	6.40256	3.60089	3.77356	3.46215	3.41383	3.43072	3.5824	2.27491	2.60779	1.39893	2.33125	1.47615	1.98886
Adgrg2	3.48831	0.710121	4.41794	3.29515	-1.15654	0.553777	-0.826232	-1.04771	-1.44492	-0.327263	1.15722	0.591502	-0.167197	0.268059	-0.0172606	0.6215
Sema3c	8.80697	9.7696	10.5104	10.511	0.541898	3.71286	1.90023	2.01179	1.57109	1.49232	7.50587	7.94659	7.36966	7.42659	7.19852	7.47663
Nhlrc2	5.82505	7.56651	5.32693	6.40809	3.79136	3.85071	2.99781	2.96689	3.29598	3.46278	2.93693	3.10686	1.9723	2.52362	2.45233	2.09528
H2-Eb1	7.0179	8.06577	6.55682	6.32085	4.70789	3.97653	3.66111	3.56569	3.19862	3.32179	3.94314	3.48857	3.36631	3.39719	3.51106	3.35023
Rasip1	11.8738	10.5915	12.2551	11.9747	8.95197	9.08938	9.05529	9.03823	9.34056	8.76771	6.76412	7.18637	6.5405	6.54413	6.266	6.41102
Stard9	7.77716	6.4014	8.67406	8.88974	5.58172	5.49917	5.05515	4.89834	5.51465	5.04216	3.33034	3.99939	4.42805	4.08709	3.69608	2.48605
Plvap	8.84804	10.695	9.96224	9.01777	6.72261	6.82893	6.91099	6.91786	7.80496	7.25164	4.81864	4.00748	3.63536	4.08709	4.48784	5.3114
Gpank1	7.88874	5.17723	7.92469	7.70533	4.08477	4.36632	4.25387	4.20678	4.33038	4.05294	3.45915	3.46525	3.92886	3.74488	3.93552	4.07097
Pik3r5	5.42533	1.71596	4.05688	3.40251	1.41394	0.954167	0.83691	1.38581	0.978023	1.61826	0.113882	0.408016	-0.167197	0.529523	0.37862	-0.0457847
Il10ra	5.42533	3.07149	4.62483	4.50966	1.24029	0.882489	0.641438	0.255258	1.55151	0.681309	0.681688	1.09536	1.49616	1.93964	1.59266	1.31498
Kbtbd3	7.17486	4.16627	8.49605	7.16011	3.79136	4.10017	3.68669	3.75457	3.89817	3.24576	3.61475	3.70309	4.07765	3.98179	4.13444	4.49453
Qsox1	10.1747	10.0915	11.2218	10.5261	7.60478	7.36598	7.15779	7.20606	8.1091	7.71667	6.85798	6.75543	5.96738	5.87351	6.3805	6.41937
Acvr2b	4.64047	2.30287	5.94698	5.32985	1.91559	1.61558	1.84676	1.38581	1.6283	1.71809	0.584616	0.90051	2.38151	1.64076	1.53558	1.31498
Dnah5	4.39381	4.52287	3.43452	3.43177	-2.01667	-1.552	-2.01667	-2.01667	-2.01667	-2.01667	0.113882	0.306708	2.35584	2.02693	1.99676	0.724577
Arhgap9	3.88266	2.02374	3.22881	2.90787	-0.231908	0.246349	-0.946936	0.928552	-0.718615	-0.620596	-0.835841	-0.520735	0.103547	0.529523	-0.943081	-0.432692
Abt1	8.14394	5.9513	8.66207	8.4337	4.87568	5.05348	4.94286	4.75401	5.00071	4.73966	4.37189	4.31196	4.25828	4.00348	4.5564	4.5447
Lcp1	8.03389	7.71872	7.53993	7.66714	3.58887	3.93285	4.28099	4.42905	3.22976	3.65977	4.84508	5.3193	4.44337	4.29481	4.67787	3.57836
Smad6	7.51496	10.0041	8.1709	8.60497	5.57869	6.01077	5.8136	5.9038	5.91789	6.69072	4.61249	5.41672	3.93321	3.55236	3.99672	4.34886
NA	7.9403	4.57634	7.64235	7.83305	3.2952	3.33734	3.77998	3.9876	2.93706	2.94973	3.41748	3.35539	4.70215	4.52213	4.78583	4.93158
Pkp3	5.27279	2.5149	5.00115	4.74931	1.04283	1.42692	1.00903	1.38581	0.823308	1.15499	1.15722	1.26699	1.44836	1.11186	1.64757	1.74913
Skap2	8.38798	8.20043	9.06016	9.28916	6.42235	5.99387	5.98114	5.85155	6.19769	5.73595	4.0651	3.83629	4.13915	4.02484	4.04864	4.11274
Larp4b	10.662	7.68869	11.5579	11.189	6.98829	6.85022	7.08847	7.07548	7.0619	6.91985	6.7488	6.91345	7.89314	7.92399	7.7272	8.19757
Mgst2	3.43701	2.2512	3.43452	3.52974	-1.15654	0.127362	-1.22365	-2.01667	-0.307596	-1.21613	0.480538	0.675177	-0.0254829	-0.462639	0.914627	0.390216
Sema3f	9.71265	8.92631	10.5332	9.98633	7.64817	7.64715	7.07157	7.17805	7.23647	7.4155	3.35997	3.66267	3.48358	2.93816	3.56435	3.25012
Rsl24d1	7.89112	6.13892	7.86736	8.1466	4.53062	4.47388	4.64695	4.31363	4.39224	4.25205	4.34991	4.33786	3.93321	3.39719	4.21541	3.94143
Arid3b	4.25261	4.74926	5.39806	5.29046	1.04283	1.89596	0.942625	0.928552	1.42807	1.05672	1.88422	1.9093	2.19137	1.74742	1.92449	1.31498
Lbh	10.0596	8.28275	10.505	10.4316	6.88388	7.32263	7.21825	7.21067	6.98368	6.76506	6.29515	6.14179	5.68758	5.69845	5.83462	5.7986
Mrc1	7.22107	4.08005	7.49872	6.03732	3.47586	3.83181	3.60318	3.87578	2.60788	3.50997	1.2232	1.03329	3.82508	3.91471	3.02235	2.27584
Adamtsl2	7.40915	4.46167	6.85737	6.15531	2.34544	1.96699	2.22754	1.92456	1.19551	1.05672	3.49965	4.10122	4.14666	4.08709	3.19816	3.65431
Hif1an	8.97933	6.5558	9.99821	9.91484	6.24785	6.18847	6.17528	6.23364	6.22885	6.25536	5.53222	5.51367	5.57247	5.52189	5.53309	5.56161
Son	10.9977	8.48852	12.3845	11.4731	7.98918	8.08754	7.77256	7.78171	8.04204	8.0115	7.01641	7.04017	8.40425	8.4534	8.14956	8.00411
Tnrc6a	9.48458	6.25003	10.3945	9.77307	5.80349	5.79594	5.71011	5.64878	5.92266	5.69774	5.53547	5.49076	6.99187	6.89967	6.68444	6.35053
Maml2	8.63841	5.65587	9.73872	9.26793	5.48769	5.60873	5.93492	6.01882	5.87422	5.8038	4.70776	4.62767	5.59322	5.35481	5.21339	4.94231
Spef2	3.92049	1.37337	4.41223	3.17916	-2.01667	-2.01667	-2.01667	-2.01667	-2.01667	-1.48555	-0.195312	-0.0484876	2.14715	1.64076	0.884467	0.510488
Itgb7	5.81504	4.05013	4.26779	3.64249	1.24029	1.61558	1.07251	1.09759	1.17005	0.542951	2.11029	1.26699	1.47246	1.40041	0.822187	1.84376
NA	7.10263	3.40278	6.25064	6.57857	2.72096	2.78963	2.86964	2.67782	1.94585	1.95479	2.89706	2.32652	3.30725	3.33012	3.63399	3.49333
Sema3g	10.4843	10.9842	11.5875	11.7852	8.51171	8.4832	8.51591	8.49613	8.75992	8.52383	6.32551	7.00017	6.86451	6.79165	6.05795	6.60193
Nek5	2.78883	1.16578	3.13477	1.80611	-2.01667	-1.552	-1.56634	-2.01667	-1.79992	-2.01667	-1.13327	-1.56872	0.701269	0.268059	-0.407146	-0.291875
Csrnp1	6.20824	8.9209	7.2507	8.43806	5.79566	4.52185	4.53591	4.64908	5.05039	5.74584	4.556	4.07065	3.3918	3.25979	3.89828	3.85319
Hoxb2	4.31076	4.79509	4.08589	5.269	1.91559	1.85909	2.41063	2.01179	2.34895	2.26097	-1.50838	-2.01667	-0.0254829	0.750792	0.0385851	-1.19419
Ago4	6.4857	4.79509	7.87049	7.68117	3.62465	3.29656	3.43222	3.75457	4.05938	3.82562	3.2376	3.47695	4.2755	4.02484	3.84054	3.63238
Ccdc88b	4.90867	1.86091	4.49025	3.16761	1.30053	0.643238	0.260319	0.255258	-0.539932	-0.327263	-0.195312	-0.0484876	1.34774	1.93964	0.822187	0.724577
Fhad1	5.45141	2.22465	5.62502	4.93787	-0.864286	-0.302987	-2.01667	-2.01667	-1.79992	-1.64182	0.858194	0.675177	2.77934	2.74573	3.08336	3.31762
Spef1	8.41805	5.74028	8.83624	8.89489	5.26014	5.30379	5.43919	5.51334	5.52974	5.68957	3.93331	4.2587	4.51182	4.41294	4.31771	4.34886
Etfb	7.9586	4.23439	7.59015	7.49907	3.72697	4.10017	4.07168	4.22515	3.29009	3.02962	3.5129	3.23647	3.98437	4.02484	4.40262	4.79811
Cdh1	8.91401	6.14601	9.26687	9.16832	-2.01667	0.356267	-2.01667	-2.01667	-1.61153	-1.21613	7.1272	6.55188	5.43669	5.40455	6.20477	6.7835
Psen2	8.20845	6.12642	8.64664	8.21674	5.16208	5.09768	4.79073	4.47582	5.2197	4.77679	4.44976	4.53552	4.25481	4.29481	4.17549	4.50904
Rac2	4.5224	3.57027	3.89419	3.05929	0.327029	-0.14484	0.260319	-1.04771	-0.458258	-0.0286264	-0.589372	0.968425	1.37356	1.64076	0.914627	0.995841
NA	7.9923	5.62828	8.28593	8.33697	4.19995	4.36632	4.05998	4.20678	4.1304	3.47234	4.61863	4.16774	4.70977	4.7053	5.08169	5.38536
Gsta3	4.22264	4.1381	5.74809	4.63025	1.04283	0.643238	1.27499	1.09759	0.948379	0.542951	3.0684	1.15487	1.12264	1.84673	1.66541	1.55766
Btk	2.61512	1.16578	2.92602	2.68298	-1.15654	-1.2011	-0.826232	-0.473252	-1.29557	-0.704298	-1.50838	-1.56872	-0.0946006	-0.462639	-0.0753554	-0.103485
Cadm1	8.85295	7.57966	9.9418	9.56468	1.99064	2.76991	2.86068	2.96689	3.48851	3.10532	4.86071	5.59381	7.13838	7.12164	7.44025	6.9282
Sla	5.28734	2.2512	5.65194	4.8211	0.206265	0.458399	0.204737	-0.0634934	-0.718615	-0.704298	1.61602	1.55898	2.5941	2.69332	2.67128	2.5151
Gpatch3	6.35363	4.01182	6.54772	6.57257	3.28032	3.12081	3.02213	2.96689	3.50896	2.90805	2.58203	2.49717	2.32969	2.33125	2.8221	1.84376
Matn4	6.20058	2.42449	5.46859	5.36945	-2.01667	-1.552	-0.714852	-1.04771	-1.44492	-1.21613	1.01544	1.51424	3.43536	3.42959	3.32709	3.38736
Cox17	5.33014	1.46694	5.8059	4.82845	0.638414	1.08765	0.365445	1.24888	1.36215	0.389902	1.2232	1.15487	3.0514	2.79629	2.24245	1.22408
Rbm47	5.66709	2.91426	4.77934	4.65114	-1.15654	-1.552	-0.946936	-2.01667	-1.29557	-1.34456	3.69833	2.56455	0.433144	1.74742	1.8327	2.13324
Myh14	9.13328	10.1668	8.32827	8.1431	4.07618	4.43056	4.34666	4.29637	3.78113	4.09996	6.507	6.96528	6.64689	6.59501	7.13789	4.5726
Phf20l1	8.02306	5.37426	9.99928	8.82746	5.78516	5.62529	5.35712	5.32181	5.7314	5.95895	4.9315	5.20781	5.80846	5.61639	5.31723	4.18079
Clec1b	3.48831	2.40097	3.38869	3.30573	1.1117	0.643238	0.976209	-0.0634934	0.756456	0.745811	-2.01667	-1.56872	-1.06815	-1.0398	-1.17748	-1.81041
Psmd13	10.6718	8.21904	10.5893	10.2296	7.42535	7.23181	7.13938	7.34691	7.30349	6.76312	6.72338	6.57657	6.22042	6.18001	6.21313	6.33297
Cd84	3.63207	0.459997	3.38869	1.47238	-0.621382	-0.683257	-1.07867	-0.0634934	-1.44492	-0.262385	-1.13327	-0.520735	0.0404743	0.529523	-0.199072	-0.508614
Rhebl1	6.11342	3.72033	6.86366	6.67655	3.13901	2.93844	2.86964	3.24408	2.92188	2.783	2.60696	2.40214	3.2031	3.49228	2.5612	2.5151
Pstpip1	4.98208	1.92826	3.35334	3.78913	-0.864286	0.127362	0.0238576	-0.0634934	-0.458258	-0.2003	0.246726	-0.720139	1.79258	1.84673	1.32715	1.15194
AB124611	3.14902	0.365959	2.07704	2.87274	-1.15654	-1.552	-0.424552	-2.01667	-1.44492	-1.48555	-1.50838	-1.22741	-0.167197	0.942594	-0.334402	-0.67361
Klf2	10.7262	11.8374	12.3706	12.7778	9.22516	8.8526	8.92121	8.93321	9.94965	9.26998	8.51562	8.70305	7.37406	7.41653	8.29082	8.27939
Tifab	3.58572	1.22055	4.12834	3.80412	0.327029	-0.683257	-0.182995	-2.01667	-1.16025	-1.21613	0.246726	0.754263	0.780608	1.26334	0.914627	0.881523
Slc37a1	6.14572	3.29208	4.39494	5.13013	1.41394	1.96699	1.69367	1.51085	1.53166	1.49232	0.681688	1.42036	2.41919	2.74573	2.18174	1.85894
Pex6	9.57707	6.84981	9.81583	9.60605	6.20712	6.28545	6.02292	5.9038	6.30099	5.93494	5.98629	5.89366	6.02044	6.11177	5.93275	5.71865
Ackr2	4.39381	7.10398	5.36589	5.59744	3.23474	3.67093	3.64031	3.75457	3.02489	3.50532	0.368363	-0.345575	1.32145	0.529523	0.884467	1.53893
Otulin	8.32413	6.14954	8.90449	8.40448	5.43156	5.66855	5.36981	5.30464	5.38787	5.08642	4.21857	4.41899	4.25481	4.41294	4.46254	4.35155
Rpl35a	8.33818	4.80856	7.40902	7.3147	3.61282	3.83181	4.00409	4.16932	3.53412	3.35318	3.4315	3.75209	4.6996	4.49177	4.7899	4.8598
Pabpn1	7.95632	4.33709	9.5905	8.07519	3.53973	3.52557	4.34987	4.50618	4.04894	3.99441	3.91346	4.17494	6.53408	6.44063	6.06637	4.80988
Eif4e3	8.8975	4.95705	8.95303	9.17762	5.52604	5.93086	5.87609	5.79119	5.42601	5.77318	4.86588	4.92977	4.95394	4.79507	4.67567	4.88227
Rplp2	9.57633	6.94537	9.18816	9.48186	5.39749	5.4689	5.91015	5.85745	5.42736	5.47802	5.36326	5.36411	6.07752	5.95923	6.34564	6.55899
Ptpn18	6.96003	3.83884	6.16657	5.90448	3.07146	3.1818	4.0243	3.77964	2.98894	3.20045	1.01544	1.51424	2.1321	1.84673	1.89454	2.24149
Cfap65	5.41211	2.77484	4.06418	1.59815	-2.01667	-2.01667	-2.01667	-2.01667	-2.01667	-2.01667	-0.195312	0.408016	2.60504	2.93816	2.06558	-0.103485
Hnrnpm	11.2667	9.36694	11.151	11.4132	8.18913	8.1181	7.92893	7.99342	8.27482	7.80682	7.5362	7.66893	7.03801	7.08651	7.0746	7.23652
Nfe2	2.86842	1.79025	2.24078	2.76191	-1.52343	-1.2011	-0.259107	-2.01667	-1.16025	-1.64182	0.246726	1.15487	-1.37703	-0.462639	-1.3107	-1.07396
Arhgap4	5.10219	1.46694	2.64335	1.94788	-0.621382	0.356267	-1.38484	-2.01667	-1.03654	-0.793157	0.584616	0.197745	1.8116	1.52559	1.18591	-0.163589
Hdgf	11.3372	9.08692	11.5792	11.5165	7.76702	8.00715	7.93935	7.95953	7.82447	7.8439	7.89681	7.87982	7.62072	7.65441	8.03711	8.31027
Emc1	9.45588	6.80795	10.2388	9.89872	6.00021	6.20325	6.29655	6.14959	6.24036	6.03109	5.76325	5.76112	6.57011	6.65104	6.75438	6.64034
Itpr2	9.12013	6.87457	10.6508	9.9911	6.88756	6.94673	6.7613	6.75358	7.45117	7.32076	5.04532	5.2043	5.57386	5.56627	5.64863	5.11984
Ptgfrn	9.61723	10.0893	10.0978	11.0648	7.47684	7.54856	7.41972	7.36979	7.55838	8.00575	6.20005	6.79103	6.09605	6.00832	5.9346	6.5723
Mxra7	9.85256	8.13823	10.4015	9.92426	7.04331	7.38312	7.01412	6.93749	6.97176	7.09758	5.88035	6.5197	5.26108	4.79507	5.51721	5.60729
Snrpe	8.38967	5.50961	8.55365	8.30009	5.02151	4.98241	5.10913	5.20637	4.47773	4.61138	4.34991	4.47843	4.94536	4.53708	4.92568	5.01529
Plac8	3.48831	4.01182	0.751818	1.27124	0.206265	1.7014	-0.110699	-0.0634934	-0.17119	-1.09821	0.113882	-0.345575	-0.243641	-2.01667	-1.17748	-0.291875
Lamc2	6.57738	3.93203	6.0646	6.36703	2.257	1.89596	1.91762	2.62346	1.31647	2.04727	3.10387	2.86104	2.92614	3.18585	3.45573	3.89799
A430005L14Rik	8.17949	5.16681	8.29139	7.96733	4.62787	5.0079	4.66765	4.75401	4.70967	4.41215	4.53666	4.39451	4.32265	4.22269	4.4803	4.47742
Psmg3	7.45176	4.95705	7.23379	7.03023	4.03245	4.14681	3.65594	3.70308	3.52912	3.35318	3.5774	3.1803	3.50125	3.69244	3.86004	3.89799
Spint2	9.16515	6.10657	9.11814	8.9034	5.00802	5.30722	5.49093	5.67574	5.61712	5.23426	5.38143	5.0946	5.39475	5.30329	5.80373	6.0811
Ifi209	2.61512	2.71887	1.95656	2.92855	-0.231908	0.246349	0.365445	-0.0634934	-0.107538	0.578804	-2.01667	-1.56872	-0.0946006	-1.0398	-1.80527	-1.62999
Ubn2	9.01365	6.64859	9.98359	9.60879	5.46484	5.54051	5.46011	5.58621	5.54591	5.3438	5.22918	5.42279	7.00793	6.98116	6.73655	5.84509
Ngdn	9.01911	6.63982	9.60059	8.74	6.007	5.91747	5.91124	6.03973	5.99422	5.61058	5.20896	5.1358	4.9432	5.24076	5.39417	5.24215
Ddah2	10.5787	9.04628	10.5258	10.9377	7.87	7.97681	7.80563	7.78481	7.60633	7.81013	6.21025	6.3582	5.8687	5.90841	5.92814	6.37516
Lpcat1	9.24281	7.52971	9.16817	8.92511	6.07109	6.07247	6.29072	6.08568	6.04675	6.23162	4.57508	4.66396	5.08279	5.05596	5.26258	4.35691
Zfp992	3.63207	0.265362	4.9389	4.35023	0.327029	0.246349	1.52238	2.01179	0.452959	1.31235	-1.13327	0.306708	0.85581	1.40041	-0.741497	0.85147
Arap1	9.48616	6.76945	9.06495	9.13979	5.82927	6.31467	5.977	5.99225	5.63001	5.96743	5.82299	5.30952	5.21898	5.12683	5.15931	5.45197
Hsp90b1	12.398	10.8672	12.8071	12.9183	9.66162	9.53459	9.52361	9.59697	9.54765	9.54984	9.0219	8.69022	8.53548	8.63194	8.64226	8.98677
Ltbp2	4.79104	3.7012	4.75245	3.96288	-1.15654	-0.480629	-0.0418523	0.255258	-0.17119	-0.083612	0.858194	0.306708	2.43153	2.63894	2.23051	1.50071
Lrg1	8.39975	7.80916	8.92621	7.28194	4.75171	4.57965	5.21666	5.28726	6.01672	5.07391	3.98177	4.9551	2.78897	3.02554	5.85129	5.55696
NA	7.02226	3.34233	6.84681	6.85411	2.80654	3.4532	3.55398	2.96689	2.81917	2.48534	3.34523	2.64976	3.49538	3.66549	3.87162	4.04465
Hyi	6.57144	4.06517	7.42472	6.38147	1.24029	2.48539	2.58402	2.01179	2.00464	1.81146	3.8099	2.99733	4.26174	4.27711	4.10204	4.08072
Ccdc28b	7.41579	5.77042	9.05237	7.74861	5.59982	3.61674	3.83135	3.75457	5.45661	3.72522	5.01304	4.05511	4.94751	4.49177	5.2434	5.01019
LOC102634709	7.68123	3.39089	7.02215	5.79145	2.55778	2.78963	3.95861	3.9876	3.52411	3.65977	2.17841	2.16223	3.3338	3.46127	4.13123	4.00765
Brd4	8.69545	7.52428	10.24	10.4303	6.47557	6.522	6.56077	6.58249	6.8367	6.64495	5.65086	5.89584	6.39524	6.25424	6.38185	6.75487
Lrrc36	3.63207	0.365959	3.78344	2.79231	0.541898	0.246349	-0.611457	-0.0634934	0.855607	-0.0286264	-0.835841	-2.01667	-0.243641	0.529523	0.334682	-0.163589
Nkapl	2.78883	1.37337	3.76562	2.71507	-0.231908	-0.14484	0.146928	-0.473252	-0.107538	0.468455	0.246726	-0.720139	-1.37703	0.268059	-0.838771	-0.360566
Smim11	8.31351	6.4552	8.91261	9.46154	5.26014	5.74632	5.59052	5.5575	5.42198	5.05176	5.55482	5.35145	5.08669	5.20377	5.56077	5.79465
Plxna1	7.45499	8.11674	8.02265	8.95889	4.97144	5.05348	4.57753	4.77909	4.67389	4.87379	4.7698	4.94249	5.45192	5.2589	5.55958	5.37748
Gata2	9.57929	9.77275	10.5352	10.7212	7.29631	7.26301	7.24088	7.24033	7.47475	7.60265	7.07678	7.43991	6.2115	6.13651	5.95469	6.48078
Socs7	8.0274	5.79994	9.758	9.02568	4.89535	5.17846	4.81645	5.11082	5.1804	5.59971	5.60209	5.75872	5.92326	5.75707	6.09957	5.99265
Pygo2	9.40424	7.23278	9.82069	9.6705	6.12622	6.39897	6.2484	6.25614	6.41239	6.16094	6.21634	6.13811	5.64714	5.69179	6.00199	6.10677
Cfap44	3.7628	0.631468	3.22881	2.29432	-2.01667	-2.01667	-2.01667	-2.01667	-2.01667	-2.01667	0.480538	0.197745	1.63071	0.268059	0.144182	0.11464
Magohb	6.71831	5.08431	7.41903	7.51823	3.80182	3.68153	3.67652	3.56569	3.43072	3.55566	3.77733	3.54526	3.76782	3.82013	4.08556	4.28846
Brd7	9.81036	6.71803	10.2312	9.93733	6.67363	6.55696	6.58205	6.49815	6.51707	6.27393	6.10042	6.2065	6.54193	6.53299	6.39929	6.54322
Ppp1r35	7.52421	5.30626	7.7724	7.54498	3.21922	3.47773	3.97532	3.47651	3.83071	3.22329	3.58996	3.94985	4.35217	4.66505	5.03612	5.00338
Tcf21	2.30766	3.9238	1.1316	2.06456	0.541898	-0.919068	0.415268	1.38581	-0.046575	0.306824	-0.835841	-0.951592	-1.56043	-2.01667	-0.741497	-1.46965
Slco3a1	8.94647	7.87305	10.0987	9.25716	6.43416	6.26973	6.09156	6.20153	6.3912	6.36273	5.75212	5.3578	5.79896	5.69179	5.8926	6.27188
Rps3a1	9.02455	7.2835	8.79319	9.77194	5.63825	5.84861	6.20479	6.26948	5.75085	5.58877	4.99898	5.41063	5.86074	5.78863	5.73884	5.96222
Rnf8	6.55349	4.05013	6.75158	6.19993	2.67619	3.00745	2.70914	2.92256	2.72615	1.99515	2.70259	2.64976	3.60298	3.46127	3.36581	3.61012
Pde5a	8.61552	6.31439	8.33017	8.58571	3.10563	3.07332	2.93941	2.96689	3.48335	3.47234	6.53162	5.99076	5.53292	5.48383	5.31441	5.70716
Lamb3	4.81133	2.73777	4.57965	4.73177	1.35835	1.61558	2.03381	1.51085	1.17005	1.4734	1.2232	0.197745	1.12264	0.942594	1.16097	1.04977
Yeats4	8.48271	6.12642	9.16243	8.96672	4.95279	5.16719	5.26671	5.36387	5.12516	5.07705	4.66685	5.07933	5.70167	5.58797	6.05711	5.96836
Bcl2l12	7.30214	5.37124	7.39894	7.20211	4.4398	4.12368	4.44589	4.52113	4.1337	4.09688	3.17228	3.41745	3.21743	3.2233	3.13552	3.10482
2410022M11Rik	5.43843	2.05421	5.63732	4.93617	1.1117	1.74247	2.30887	2.3829	1.51153	1.3335	2.17841	1.37103	2.26219	0.942594	1.89454	2.38477
Atf4	10.8133	9.34187	11.2397	11.3124	7.41687	7.53329	7.56716	7.52241	7.18258	7.40243	7.19351	7.57539	8.03691	7.95214	8.00396	8.44199
Bst1	5.15075	5.79544	5.01629	3.96622	2.09637	2.5562	2.09624	2.4469	2.54984	1.8849	2.2113	2.98098	0.277738	0.268059	1.25826	1.17639
Klf7	9.0705	8.35069	10.4933	10.3569	7.02223	7.01116	7.08173	6.98676	7.21562	7.48121	5.80425	6.17091	5.98633	6.019	5.85226	5.91214
Rbm10	7.52728	4.5868	7.457	7.4933	4.15171	3.73338	3.55398	3.50685	3.86285	3.76467	3.6631	3.80877	4.41568	4.12715	4.30068	4.56798
Grrp1	9.25951	6.9031	9.56401	8.70398	5.41462	5.88116	6.19769	6.22909	5.98239	5.62673	5.00368	5.97227	5.38526	5.2857	5.83166	5.70926
NA	3.2114	0.784707	5.17659	4.25794	-0.231908	0.882489	1.24774	1.24888	1.00707	0.429713	0.368363	0.0798758	0.891991	1.11186	1.53558	1.64785
Lysmd1	4.09609	1.75359	4.28666	4.55468	0.327029	-0.302987	0.0238576	-0.473252	0.0681271	0.348961	1.01544	0.675177	1.75378	1.11186	1.75148	1.8129
Med19	8.14594	5.54222	9.20169	8.2414	4.60416	4.67289	5.08817	4.99784	4.97888	5.12634	5.21708	5.38911	5.11567	5.01385	5.21642	5.65592
Pmaip1	6.68021	5.95937	7.40039	7.5256	1.56892	1.26723	1.67333	1.73248	0.273337	0.613788	5.88291	5.3829	3.44756	3.33012	4.67126	3.95209
Ccdc85c	8.4716	6.30175	9.55431	8.94173	5.5386	5.68444	5.45863	5.4287	5.74978	5.60298	5.37782	5.53343	5.65769	5.61639	5.79565	5.36556
S100a13	10.9785	8.58396	11.224	10.5292	7.66831	7.7683	7.76207	7.83799	7.78833	7.40149	7.07007	7.07717	6.93828	6.85266	7.33755	7.72449
Epn3	5.95835	2.71887	5.63732	5.20971	1.35835	1.65913	1.79124	1.62592	1.78745	1.63539	1.2863	1.68544	2.5151	2.74573	3.1546	3.033
Adamts15	6.92323	5.06947	6.79724	6.45398	1.04283	1.7014	1.21998	1.51085	0.721832	1.26912	4.88129	3.65238	3.75314	3.93742	3.74725	4.55639
Ccdc113	3.7628	2.30287	4.60993	3.6632	-2.01667	-2.01667	-2.01667	-2.01667	-2.01667	-2.01667	-1.13327	0.675177	1.65197	2.1871	1.87932	2.3204
Atp7b	3.53784	3.43787	3.53261	3.65908	-2.01667	-1.552	-1.56634	-2.01667	-1.44492	-1.34456	1.40478	0.829239	1.47246	1.84673	1.47615	-0.0457847
Abhd17c	8.18533	6.27289	8.71497	8.3318	4.56172	5.10557	5.07078	5.12066	5.00251	4.8935	4.81864	4.99635	5.13467	5.01385	5.1387	4.9688
Nfatc4	6.66914	4.94083	7.50209	7.38713	3.46274	3.05713	3.21029	3.09226	3.12765	3.37883	5.08579	4.50726	3.65654	3.79548	3.38748	4.04465
Slc26a4	4.79104	-2.01667	3.12082	-1.00031	-1.52343	-1.552	-2.01667	-2.01667	-2.01667	-2.01667	-0.378929	0.197745	1.32145	1.64076	1.43513	0.9681
Pygl	6.26817	3.01064	5.16304	5.59852	1.46748	2.43617	2.49415	2.4469	2.11549	2.3257	1.66433	1.76398	2.82684	2.58243	2.66242	2.24149
Slc5a1	4.31076	0.923221	3.55353	1.71383	-2.01667	-1.552	-1.774	-2.01667	-1.61153	-1.34456	0.368363	0.675177	0.741484	1.26334	1.28159	1.24735
NA	2.70458	1.86091	5.29313	3.69573	1.24029	0.807063	0.873016	1.24888	0.823308	1.20173	1.61602	0.306708	0.383179	-1.0398	0.853663	1.10176
Hoxa2	3.48831	3.44938	0.889821	3.21327	0.206265	0.246349	1.16279	1.38581	0.790269	0.777012	-2.01667	-0.951592	-1.06815	-1.0398	-1.05553	-0.76377
Fibin	5.93081	9.06814	8.26269	8.30784	1.46748	2.57905	2.66862	2.4469	1.59041	2.00836	7.41261	6.32134	4.65028	4.47635	5.48491	5.76876
Il11ra1	8.84436	5.32824	9.45531	8.65118	4.73543	5.2154	5.2701	5.35555	5.18834	4.83169	6.18357	5.56667	5.66685	5.69845	5.94102	5.99179
Nme1	9.46151	5.20804	9.24995	8.59867	4.51799	4.67819	4.57753	4.34756	4.03138	3.76855	5.31111	5.15414	6.3802	6.40442	6.77148	7.00059
Copz1	10.3918	8.10405	10.2461	10.2766	6.84395	6.8061	6.9218	6.94858	6.85629	6.77234	7.19454	7.03919	6.50298	6.51423	6.92475	7.0986
Dcaf13	7.99674	5.33136	7.81146	7.22492	4.37824	4.49206	4.39091	4.38071	4.21996	3.50532	3.84176	3.67288	4.62363	4.63757	4.62868	4.07747
Prss12	4.98208	6.12283	6.26498	5.7858	-1.52343	0.356267	0.260319	-1.04771	-1.16025	0.0754309	2.42265	2.45044	3.88465	4.10726	3.93552	4.263
Adgrl3	5.87409	6.48487	7.56204	6.99391	-2.01667	0.458399	-1.38484	-1.04771	-1.29557	-2.01667	3.7663	4.24507	5.20466	4.93705	4.94772	4.86545
Atp5k	9.61795	5.83984	10.2483	9.06103	5.40779	5.88803	6.04187	6.17815	5.3186	5.16075	5.9934	5.72476	6.74967	6.68162	6.95454	7.15659
Nkd1	8.79301	9.03486	8.77549	9.42737	2.58225	3.79324	3.06957	3.05167	2.66367	3.34799	6.91898	7.73135	6.14184	6.28112	6.50156	6.77702
Tmem221	3.53784	4.42716	3.27992	3.89447	0.43846	0.553777	0.204737	-0.473252	-0.107538	-0.262385	1.40478	1.83847	0.927286	1.26334	0.757097	1.69938
Snrnp70	10.8814	9.11203	10.7853	10.6724	6.91793	7.02994	6.97157	6.94582	7.26155	6.57732	6.85408	7.22766	8.41963	8.4749	7.78216	6.84723
Ncf1	5.78459	2.32802	4.29289	3.93591	0.638414	0.356267	0.83691	-0.473252	0.0681271	-0.083612	0.858194	1.26699	2.23428	3.02554	2.23051	2.33133
NA	4.5708	0.631468	4.37157	4.55911	0.728875	1.52433	1.69367	1.83172	0.273337	1.65231	-0.378929	0.591502	1.23958	0.750792	0.194216	1.20043
Prdm8	5.72169	4.83073	5.60261	7.00935	-1.52343	-1.2011	-1.38484	-1.04771	-1.03654	-1.64182	2.39429	3.29054	3.95046	3.7189	4.17238	4.80792
Samd5	7.18655	6.78656	8.99115	9.27728	5.74236	5.48411	5.80428	5.76632	5.38649	5.96827	4.37915	4.40067	5.09835	5.26789	5.05824	5.07503
Lgi3	8.72648	4.53912	8.21384	7.62606	0.0744609	-0.00232876	-0.51498	-2.01667	-0.626509	-1.48555	4.4838	4.61713	6.25556	6.1316	6.10039	6.14831
Nox4	4.09609	3.02609	3.03416	3.88745	0.206265	0.246349	1.19166	1.62592	0.494576	1.35433	-0.0324478	0.0798758	-0.324363	1.26334	-0.199072	-0.588754
Irx2	5.57519	3.29208	4.56942	5.23206	-0.621382	0.807063	1.21998	0.928552	0.365942	0.389902	0.584616	1.09536	3.05938	3.02554	3.07671	2.38477
Fam110a	7.06512	6.74046	7.22567	7.2467	3.56451	4.22858	3.82214	3.59424	4.03843	3.46278	4.24263	4.75811	3.7183	3.84436	4.00375	4.39387
Zfp503	6.73433	7.77355	7.51947	7.60668	3.63639	4.06013	3.89419	4.29637	4.56089	3.96423	4.81329	4.62767	4.2755	4.42906	4.69317	5.04048
Tmem160	9.04504	5.83327	9.00593	8.30488	5.10833	5.49617	5.51112	5.46006	5.22589	4.53359	4.50385	4.75811	5.66031	5.73779	5.93091	6.07299
Ube2j2	7.67571	5.4392	8.25633	7.55831	4.37824	4.49206	4.61533	4.11126	4.66024	4.27954	4.0194	4.36961	4.61824	4.31229	4.955	4.72954
Megf6	7.30929	7.0671	8.0156	8.08424	4.93389	4.99095	4.81877	4.72848	4.98254	4.99152	3.84176	3.68302	4.67385	4.62364	4.60113	4.0677
Cnn1	3.14902	2.40097	3.75662	2.65844	0.0744609	-1.2011	0.598952	-0.473252	-0.458258	0.0243403	-2.01667	-0.520735	0.780608	0.750792	1.3929	-1.07396
Serpina3f	2.70458	3.19969	3.51138	2.0267	1.91559	0.727475	-0.339459	-0.0634934	0.855607	0.172485	-0.0324478	-2.01667	-1.77059	-1.0398	-1.17748	-1.07396
Tmem102	2.94385	0.265362	2.43367	3.46517	-2.01667	-2.01667	-1.56634	-2.01667	-1.61153	-2.01667	0.858194	0.306708	-0.0946006	0.750792	0.42126	0.431431
Sertad1	9.25581	7.18194	9.62117	9.20612	6.34758	6.23957	6.36232	6.28269	6.20241	5.84855	5.87523	6.007	5.35318	5.34635	5.861	6.0811
Snx20	3.95736	2.05421	3.21574	2.78477	-0.413542	-0.14484	1.10324	0.255258	-0.107538	0.389902	0.246726	-0.0484876	0.221979	-1.0398	0.884467	0.304076
Ltf	3.99332	3.89883	3.47894	2.1492	-0.231908	0.246349	-0.424552	-0.473252	-0.626509	-0.887851	-0.195312	1.94345	-0.167197	0.750792	1.93924	1.29279
Clec12a	3.43701	0.265362	2.70074	2.35668	-1.15654	-0.683257	0.204737	-2.01667	-0.307596	-1.34456	-1.50838	-0.951592	0.481437	1.11186	-0.135888	-1.07396
Ikzf1	4.28198	2.66065	3.12082	3.15597	-0.621382	-0.683257	-1.07867	-1.04771	-0.922599	-0.395196	0.480538	0.591502	1.1823	1.64076	1.25826	1.31498
Acot1	4.92738	2.37706	6.20509	6.00037	0.43846	1.15003	1.61056	1.62592	0.887198	1.00495	2.72554	2.27381	2.76965	2.52362	3.41411	4.00082
Clec10a	4.02839	0.0403116	3.29242	3.88039	0.206265	-0.480629	0.0238576	-1.04771	-0.17119	-0.083612	0.246726	-0.189397	1.69356	1.74742	0.42126	-0.163589
Cldn5	12.4129	11.601	12.8651	12.4758	8.42431	8.60058	8.61017	8.60446	8.23068	8.83758	9.79944	10.6194	9.59736	9.62844	9.5433	9.90994
Itga3	6.99148	8.3372	7.58952	7.5737	3.95959	4.34648	4.03231	4.03001	4.61849	4.2098	5.22516	5.19724	4.81951	4.80745	5.08002	5.0734
Ripply3	8.08685	8.81282	8.39897	8.13719	5.99793	6.39575	6.1653	6.31735	6.33575	6.07097	3.61475	4.11627	1.9207	1.84673	2.39999	2.98536
Gimap1	8.73845	7.51404	9.43007	9.49996	6.3967	6.60646	6.54547	6.42456	6.58607	6.24563	5.07242	5.63357	5.01057	4.98143	5.06833	5.29614
Aff3	6.39454	7.59852	7.69626	8.31832	0.206265	1.74247	1.04112	1.09759	1.82055	0.26342	5.54518	5.07933	5.59185	5.29452	5.81277	5.97011
Mcrip1	9.85378	7.49473	9.82742	9.31023	6.59463	6.86075	6.68909	6.66554	6.56486	6.27871	6.14791	6.33587	5.9471	5.97028	5.97003	5.93202
NA	5.33014	1.59682	5.26486	5.01562	0.638414	1.08765	1.9348	2.24569	1.57109	0.745811	1.08807	0.754263	1.93811	2.02693	2.8061	2.95034
Lpin1	7.16701	5.12076	8.58986	7.69983	4.78371	4.82403	4.61266	4.31363	4.74458	4.62001	4.90661	4.57962	4.49721	4.32956	4.42112	4.30241
Mfap4	6.26817	5.83546	6.73106	7.84714	1.04283	1.32245	2.32199	2.31592	1.40643	1.71809	5.82033	4.6843	3.54167	3.98179	4.3401	4.74597
Rbm14	8.26101	6.58087	8.19399	8.04256	5.16613	5.15203	4.9322	5.12066	5.07632	4.67695	4.82397	4.81456	4.60195	4.29481	4.92383	5.09921
Cd37	3.88266	2.77484	4.62976	3.37766	-1.52343	0.246349	0.0238576	0.737046	-0.626509	-0.327263	0.113882	-0.0484876	2.03836	2.10924	1.53558	1.37958
Maats1	1.91643	1.42091	3.31709	2.12552	-1.52343	-2.01667	-1.774	-2.01667	-1.79992	-1.8171	-0.589372	-0.951592	0.701269	-0.0515152	0.790009	0.347789
Car3	3.72052	4.3918	4.18306	2.41645	1.1117	-1.2011	1.84676	1.38581	1.6283	1.00495	-0.589372	-0.520735	1.37356	1.40041	0.944169	-0.0457847
Rps14	11.5276	8.48887	11.1929	10.4401	7.81362	8.14467	7.91195	7.87481	7.64698	7.44008	7.53214	7.59365	7.71178	7.68828	8.03325	8.01644
Ak7	3.38383	2.59998	4.52774	3.01487	-2.01667	-2.01667	-2.01667	-2.01667	-2.01667	-1.8171	-0.195312	0.408016	2.10152	2.10924	2.01079	1.24735
Snx8	8.07222	5.57936	7.75332	7.55416	4.66271	4.78524	4.74275	4.86359	4.4249	4.18965	4.61863	4.4726	4.3424	4.31229	4.35117	4.27153
Pou2f2	3.88266	2.17004	5.88024	5.87638	-0.231908	-0.683257	-0.946936	-0.473252	-0.17119	-1.34456	1.2863	1.80171	3.88016	3.2233	3.5452	2.84752
Srp9	9.05782	6.18612	9.40385	9.02668	5.19419	5.60316	5.48657	5.73462	5.3157	5.26209	5.44504	5.55292	6.1725	6.21296	6.5848	6.56826
Slc16a9	6.17732	8.05168	7.3975	7.57725	0.541898	2.24935	1.8648	0.928552	1.86882	1.95479	6.10917	5.82204	4.69449	4.98143	4.76942	5.27365
Upk3b	4.33898	2.97922	3.48984	4.59835	0.206265	0.807063	2.06536	2.78075	1.93077	2.71212	-2.01667	-2.01667	-1.56043	-2.01667	-2.01667	-2.01667
Tap2	10.4552	9.117	10.6809	10.6517	8.2323	8.02442	7.84081	7.82901	8.19108	7.72694	6.49536	6.30337	6.30252	6.26326	6.17471	6.37714
Rpl9	4.5944	1.46694	5.00495	4.96815	-0.231908	0.553777	0.598952	-0.0634934	0.320382	0.837459	1.01544	1.03329	2.84541	2.79629	2.58951	1.74913
Cdca7l	3.8438	5.34375	3.92662	4.83759	2.12996	1.89596	2.69911	3.24408	1.14413	1.89915	0.368363	0.502674	1.06042	1.40041	0.688931	0.212465
Rhoj	9.49089	7.86716	9.62889	9.72992	6.57037	6.96853	7.18048	7.24708	6.64154	7.2747	5.89561	6.29016	4.70469	4.53708	4.30353	4.87295
1810037I17Rik	9.52199	7.16372	9.3138	9.61916	6.09679	6.53082	6.27225	6.30445	6.08897	5.88838	6.31798	6.75061	5.8845	5.95367	6.2594	6.05414
Lrrc14	7.91943	5.71666	8.64968	8.19255	5.01253	4.94331	4.9322	5.07075	5.05735	4.72973	4.9315	4.85549	4.91491	5.10693	5.10966	5.3031
Misp	2.78883	1.46694	2.86037	1.56332	-0.0706064	-0.919068	-0.424552	-0.0634934	-0.380961	-0.541485	-1.13327	-0.720139	-0.243641	-1.0398	0.144182	-0.76377
Nenf	9.12114	6.63857	10.0034	9.3874	5.0699	5.3806	5.90035	6.00294	5.28193	5.33466	6.31798	6.2065	6.70397	6.61979	7.16088	7.12671
Plaur	6.61824	7.58684	6.39092	6.58619	4.63958	4.96516	4.69312	4.7666	4.37005	4.80166	2.58203	3.06093	1.60914	1.26334	1.70046	2.28711
Ttc25	2.78883	1.27331	3.87769	2.46443	-0.864286	-2.01667	-1.774	-1.04771	-1.61153	-1.8171	0.246726	-0.0484876	1.37356	0.750792	0.790009	0.724577
Ndufb7	10.7148	7.49819	10.9155	10.175	7.16476	7.48948	7.44318	7.49428	6.95509	6.68662	6.91649	6.78515	7.45338	7.43858	7.63284	7.96452
NA	5.84487	4.88259	7.04172	7.3065	3.82251	3.86937	3.71183	4.00896	4.06284	3.59559	3.13848	2.78774	3.61385	3.55236	3.40882	3.45886
Nkd2	5.86441	6.3895	7.30492	6.69477	1.66371	0.954167	0.722831	-0.0634934	0.918113	0.613788	5.1165	5.26632	3.95475	3.7704	4.28921	4.71918
Gm12216	3.99332	2.93077	5.12511	4.33223	1.70886	1.7014	1.98516	2.4469	1.49111	1.43479	0.113882	0.0798758	1.21122	1.26334	0.944169	0.431431
Tmem69	7.04813	2.93077	7.2175	6.07103	3.23474	3.50185	3.40164	3.82851	3.23591	2.96335	3.70988	3.70309	3.71325	3.63803	3.5209	3.88692
NA	9.38661	7.66296	9.38337	9.47515	6.821	6.64893	6.19769	6.03973	6.19769	5.83193	6.35156	6.27348	5.76766	5.85574	5.96824	6.14754
NA	3.53784	3.32993	3.20256	3.87685	1.1117	1.89596	1.10324	0.516171	1.49111	0.951248	0.246726	-0.520735	-0.409871	-1.0398	0.37862	0.11464
Cdk11b	10.0696	6.94639	10.0939	9.29961	6.8578	6.72262	6.58953	6.50192	6.92306	6.66124	6.20209	6.43672	6.66334	6.7854	6.28777	6.2526
Psmd4	10.5206	8.59857	11.2579	10.6737	7.49306	7.40167	7.61692	7.6705	7.62255	7.06516	7.42142	7.11793	7.65797	7.70657	7.92929	8.26681
Akap17b	5.05193	1.92826	7.22973	6.30447	1.91559	2.1912	1.95178	1.38581	2.33756	2.50411	3.28471	3.66267	3.82508	4.31229	3.683	3.47866
Cd44	8.17753	5.17376	8.21055	7.55166	5.54795	4.8849	5.29194	5.62822	5.42736	5.50273	3.90344	2.96444	3.73333	4.10726	3.36034	2.67807
Slc29a3	6.37423	4.35556	7.14698	6.14357	2.94507	2.88442	3.10036	2.96689	3.28417	3.1889	3.744	3.57824	3.52449	3.79548	3.66092	3.60111
Hpn	3.32861	0.459997	3.40029	1.93431	0.541898	-0.14484	-0.611457	-1.04771	-0.380961	-0.793157	-0.195312	0.0798758	0.617312	-0.462639	0.542103	-0.76377
Cc2d1b	8.01215	5.00073	8.29061	7.61175	4.62787	4.60214	4.46671	4.4604	4.55598	4.16922	4.94134	4.59581	5.26108	5.22238	4.86132	4.62683
Met	4.88972	3.35462	5.55931	4.72588	0.894376	1.02245	2.21352	2.09404	1.22053	1.81146	1.66433	1.60238	2.35584	2.26098	2.06558	2.72855
Rpn1	10.7198	8.8008	11.1823	10.6352	8.04306	7.90515	8.00208	7.9759	7.96618	7.73441	7.59735	7.34009	7.11369	6.9424	7.28042	7.51818
Lsp1	6.42776	4.17323	5.94302	5.89751	2.82716	2.72962	3.25885	3.05167	2.86749	2.21614	3.5774	3.01349	2.74018	1.93964	3.02235	3.19134
Smarcd2	9.71736	7.79738	9.92973	9.73035	7.32831	7.31243	7.04412	6.97324	7.21173	7.12701	6.06487	5.98462	5.51563	5.36322	5.4141	5.25942
Trim5	4.5468	2.96325	6.20839	5.85763	3.07146	2.93844	2.62694	2.78075	3.30771	2.43732	2.00168	1.97681	2.17678	1.26334	1.55486	2.17024
Nova2	9.53424	7.6101	9.8437	8.94849	6.54258	6.76185	6.41608	6.39647	6.75719	6.40703	5.24117	6.23608	6.02757	6.07127	6.04608	6.29648
Dll1	6.72367	8.32983	7.3727	7.3032	5.33765	5.4411	5.42558	5.49075	5.80768	5.67307	1.92445	2.8788	2.17678	2.4623	2.33457	2.0694
Mms19	8.54914	5.98134	8.38554	8.01825	5.24105	5.31745	5.21842	5.18776	5.4287	5.14888	4.82927	4.61713	5.34341	5.312	5.00316	4.82155
Eef2kmt	6.79669	4.07263	7.719	6.94739	4.22348	4.10017	4.02831	4.13087	3.56375	3.55116	4.44976	4.07835	3.60298	4.06664	3.80877	3.98707
Cracr2a	4.33898	2.14195	3.68259	2.89392	0.43846	-0.302987	-0.424552	0.928552	-0.539932	0.172485	-0.0324478	-0.0484876	1.90308	1.40041	1.53558	0.347789
Dnase2a	6.76064	3.78535	7.95449	6.58727	3.32451	3.48984	3.96281	4.13087	3.45727	3.7172	4.4972	4.10122	4.21609	4.04589	4.04864	4.51385
Armcx4	7.57254	7.8821	7.61959	8.20019	3.44949	4.29909	4.30762	4.34756	3.39271	4.32247	4.77531	5.49365	5.79658	5.73131	5.42199	5.75157
Agpat4	8.91869	8.11267	9.66329	9.09239	5.7342	5.59758	5.71634	5.19709	5.82715	5.55766	6.82914	6.51403	6.25382	6.25875	6.53774	7.05187
Elf3	3.43701	2.11329	4.93492	3.19631	-2.01667	-1.552	-1.56634	-2.01667	-2.01667	-2.01667	3.12128	1.83847	0.528165	1.11186	0.334682	2.3204
Tssc4	9.21358	6.61576	9.08776	8.7537	5.88197	6.0825	5.6632	5.64878	5.72048	5.44075	5.85195	5.7	6.08437	6.00294	6.06805	5.98316
Hdac7	10.4926	8.73149	10.9812	10.8833	8.44698	8.52352	8.13556	8.06654	8.59604	8.50823	6.37171	6.75783	5.83193	5.87351	5.54519	5.45822
Dhrs13	5.64466	4.60235	6.63986	5.63462	3.36739	2.99051	3.27243	3.85234	2.85156	2.97685	2.63147	1.87432	2.97756	2.58243	2.66242	2.70353
Nthl1	5.59872	4.08005	6.3586	5.82951	2.76438	2.53298	2.49415	2.50819	2.53994	2.22748	3.2376	3.20866	3.04338	2.58243	3.11618	3.26159
Mfsd6l	2.78883	0.157221	3.0192	1.776	0.327029	0.127362	-0.339459	0.737046	-0.107538	-0.083612	-2.01667	-1.56872	-0.81388	-1.0398	-1.45749	-0.962986
Prickle2	8.07851	8.09171	9.74556	9.54285	5.55106	5.86032	5.65804	5.71526	5.94629	5.93667	5.58337	5.71491	6.78257	6.85862	6.80003	7.0683
Rpgrip1	2.61512	0.710121	3.88597	2.59949	0.638414	0.458399	0.313839	-0.473252	-0.539932	-0.395196	-0.378929	-0.0484876	0.383179	0.268059	0.194216	-0.226307
Arid1a	9.36189	7.69051	9.70025	9.64307	6.51265	6.76932	6.42447	6.20153	6.72477	6.7326	5.75491	6.15278	6.57985	6.61627	6.38992	6.26191
Clec4a1	3.53784	0.784707	1.85909	2.5647	0.327029	0.553777	-0.339459	0.737046	-0.046575	-0.793157	-1.13327	-0.520735	-0.81388	0.268059	-0.334402	-1.46965
Plekha2	8.82579	9.00641	9.68107	9.46412	6.70182	6.76808	6.64996	6.59314	6.90726	7.00013	6.73049	6.39722	5.43822	5.37989	5.98965	5.92211
Ccpg1	7.07773	6.00688	8.02031	8.27189	4.94809	4.68347	4.5246	4.72848	5.11352	4.66865	4.09184	4.13855	4.87705	4.80745	4.95681	5.20103
Npm1	9.52045	6.87777	9.86295	9.86432	6.35825	6.25028	6.66226	6.6588	6.35988	6.44091	6.33114	6.33908	6.80112	6.80406	6.70777	7.05352
Supt16	9.21928	7.24934	9.743	9.43062	6.53163	6.38769	6.51651	6.37606	6.51959	6.59275	6.04448	6.17451	6.20702	6.32484	6.15115	6.15448
Kmt5c	6.89024	3.95643	7.15812	6.34861	3.84291	3.83181	3.31898	2.78075	3.58317	3.15367	3.65116	3.55634	4.20893	4.47635	3.79667	2.91446
Alas2	4.68512	0.631468	2.49983	1.90679	-1.15654	0.356267	1.42845	0.737046	0.273337	2.07263	-1.13327	0.0798758	-0.409871	-0.462639	-0.483753	0.85147
Ndufa3	10.4484	7.49055	10.6726	9.78812	6.6722	7.09877	6.95797	6.98676	6.59865	6.26914	6.89134	6.91453	7.35637	7.32261	7.89567	8.13852
Aamp	10.6345	8.83246	10.7684	10.4054	7.8284	7.72798	7.4473	7.43831	7.7198	7.22395	7.84993	7.7011	7.10938	7.21055	7.41838	7.33619
9130008F23Rik	2.94385	1.92826	3.7293	3.66731	0.728875	1.15003	1.24774	0.928552	1.22053	1.3335	-0.0324478	-0.720139	-0.701787	-1.0398	-0.334402	-0.859942
Scd1	10.1737	7.36476	9.55057	8.70884	3.07146	4.3331	4.75973	4.80374	4.37841	4.13651	6.44613	6.53658	7.62409	7.52358	7.85688	7.30118
Ubxn10	4.5224	2.42449	4.72965	4.26879	0.638414	0.643238	1.07251	1.51085	0.756456	0.978347	1.84284	-0.345575	1.9723	1.64076	2.16929	2.21813
Ptgir	4.33898	0.459997	2.73777	1.18222	0.206265	-0.14484	1.24774	0.928552	0.365942	0.468455	-0.589372	-1.56872	0.617312	0.529523	-0.135888	-1.19419
Plb1	3.43701	1.04959	3.95835	3.50701	-1.52343	-1.2011	-0.611457	0.255258	-1.44492	-1.09821	1.61602	0.829239	1.29468	1.26334	0.914627	1.33684
Ccdc153	3.92049	3.48337	4.51179	2.87984	-2.01667	-2.01667	-2.01667	-2.01667	-2.01667	-2.01667	0.858194	0.829239	2.62667	2.52362	2.19409	1.82841
Trappc4	8.94876	7.6069	8.85031	9.09391	6.19329	6.40537	6.09443	6.19688	6.15372	5.86588	5.77154	5.89802	5.52574	5.62341	5.76597	5.39711
Mycbp2	9.63583	6.25003	10.4111	10.025	5.93994	5.93751	5.7373	5.66904	5.89671	5.75469	6.6873	7.13003	7.84867	7.91401	7.82572	7.13648
NA	7.30929	6.13	6.93116	7.60695	4.33569	4.63522	4.5046	4.5794	4.45946	4.22967	4.04699	3.94142	3.95902	4.20408	4.28633	4.35423
Zfp688	6.23852	4.82632	6.03329	5.75719	3.13901	3.0242	3.24514	3.34831	3.10096	2.55899	2.81385	2.56455	3.01905	2.8924	3.10314	3.27297
Psmd2	10.2835	7.73174	10.6189	10.0071	7.50511	7.40567	7.30629	7.32153	7.59112	7.15697	7.04748	6.98488	6.90103	6.87929	7.04934	7.10498
Txnl4a	9.46391	7.47656	9.63856	9.20197	6.69903	6.77304	6.54686	6.45988	6.50567	6.23373	5.83359	6.04288	6.22131	6.24061	6.34979	6.23816
Trpm6	5.16658	2.5149	5.36589	4.10891	-0.864286	0.127362	0.0238576	-1.04771	-0.539932	-0.620596	3.0684	3.42955	2.76965	2.33125	2.10535	2.2063
Bik	5.87409	4.76317	4.85291	5.92692	3.69366	3.47773	3.65075	3.24408	3.26626	3.73717	1.15722	-0.189397	0.331422	0.750792	0.37862	1.076
Gsn	10.5125	11.5972	10.1384	10.1954	6.55345	6.52348	6.58953	6.61071	6.50821	6.629	9.3558	9.65479	8.06194	8.05955	8.29942	6.93224
Dok1	5.87409	6.40584	5.7706	6.107	3.75953	3.46551	3.72671	4.11126	4.00642	3.52383	2.97573	2.35217	2.2483	2.58243	2.66242	2.79322
Sppl3	9.12621	8.17379	9.74314	9.69339	6.52848	6.67965	6.62371	6.66554	6.86524	6.79918	6.04904	6.18347	6.37781	6.22685	6.64113	6.552
1110038F14Rik	8.00996	7.32236	8.69687	7.98183	5.99566	5.80808	5.53948	5.66904	6.05112	5.08798	4.64294	4.90832	4.81716	4.67859	4.70616	4.70664
Lyve1	5.24323	9.7673	6.10058	5.91919	6.0205	5.31745	6.13217	6.06033	6.56791	6.72262	2.39429	1.03329	1.06042	0.750792	1.49623	1.40049
C1s1	5.82505	4.32465	4.42363	5.17408	2.60631	2.6237	2.38586	3.09226	2.21843	2.3673	1.61602	2.13294	2.63737	2.4623	1.64757	1.12707
Syt15	6.42776	4.87834	6.6915	6.51392	2.37376	3.19666	3.62451	3.41383	2.78603	3.36862	4.1941	4.78661	3.21743	3.02554	2.62643	3.70561
4933408B17Rik	1.75827	2.82871	2.70074	3.10844	0.541898	0.727475	0.598952	-0.473252	-1.03654	-0.140777	-0.835841	-0.951592	0.701269	-0.0515152	0.617384	-0.859942
Pard3	7.05239	7.0206	8.36794	7.95605	3.75953	4.13914	4.27426	4.0712	4.06284	4.78065	5.67758	5.90454	5.05513	5.0663	5.22095	5.49635
Sh3pxd2a	9.06629	7.95608	9.97961	10.2134	6.94649	7.21458	6.81971	6.67225	7.43422	7.17648	7.07678	6.68652	5.88675	5.8317	5.99583	6.62377
Abcf1	9.76753	7.10762	10.403	9.81509	7.3807	7.42472	7.24562	7.25157	7.37383	7.01615	6.29707	6.35027	6.28986	6.28997	6.41849	6.73031
Gpaa1	8.26286	5.72852	8.2322	7.56603	4.99441	5.10557	4.98265	5.05029	5.14163	4.75932	4.84508	4.59043	5.11567	5.14645	5.00842	4.84462
Ppp1r15a	7.55461	6.68677	7.5736	8.34404	5.02151	5.04119	4.91499	5.09092	4.92092	5.31752	4.9511	4.89529	4.44337	4.55187	4.58246	4.85223
1700017B05Rik	7.4191	6.64484	7.68029	7.17569	5.42142	5.07374	5.05712	5.01905	5.11519	4.96974	2.24345	2.99733	3.6826	3.7189	4.16612	3.63679
Stk4	6.66914	7.91256	7.44025	8.14107	4.59216	4.62428	4.5246	4.53592	4.84251	5.02926	4.99898	4.87332	5.09059	5.03506	5.15142	5.16788
Cep44	6.65237	5.13509	6.40681	7.015	4.15171	3.95048	3.89857	4.00896	3.93264	3.55566	3.78827	3.38054	3.42305	3.46127	3.49618	2.98536
Ptgis	8.52631	6.21506	8.55462	8.16722	5.14575	5.40638	5.2701	5.00849	5.60054	5.49101	6.38978	5.8849	4.45853	4.65138	4.72117	5.11668
Dock2	3.67697	2.66065	3.4569	2.46443	-0.864286	0.127362	-0.110699	0.516171	-1.16025	-0.704298	0.858194	0.306708	1.54242	0.942594	1.05664	0.510488
Brd3	8.16182	6.96855	9.74399	9.11031	6.24976	6.31467	6.08773	5.88659	6.34716	6.24494	5.9157	5.83347	5.97161	5.86761	6.05288	6.0948
Gpsm3	5.91215	3.94021	5.357	5.01078	2.16278	2.33239	2.63748	2.56697	2.44761	2.3673	2.95646	2.74964	2.16204	2.39826	2.45233	2.34218
Slc35e4	7.38567	6.71803	7.78628	7.01581	4.34287	4.06013	4.12505	4.3307	4.23232	3.97772	4.50385	4.7629	4.91271	4.84396	4.88246	4.92257
Col27a1	6.11342	2.89755	5.54371	5.46925	1.17742	2.06738	1.80998	1.83172	1.22053	0.837459	2.2113	2.56455	4.15039	4.10726	3.06331	1.96099
Nsrp1	6.70752	5.97737	8.22936	8.18003	5.35551	5.08974	5.05515	4.95447	5.14816	5.07234	4.65495	4.44902	4.15412	4.52213	4.23944	4.69822
Erbb3	5.55127	3.15821	5.39226	4.82294	0.638414	1.08765	1.47618	1.38581	1.22053	0.923631	1.92445	1.87432	3.45363	3.42959	2.87675	2.80894
Adamtsl5	6.22346	5.39524	6.19181	6.09866	3.68239	3.94169	3.51452	3.09226	3.49877	2.82092	3.45915	2.93079	3.16665	2.8924	2.86134	3.05295
Riiad1	3.48831	1.55481	3.09251	2.95566	-1.52343	-2.01667	-1.38484	-2.01667	-1.29557	-0.989199	0.246726	-0.189397	1.65197	1.26334	1.43513	0.757362
Klf5	5.15075	0.784707	5.25532	3.92908	-0.621382	-1.2011	-1.07867	-1.04771	-1.16025	-0.395196	3.4315	2.49717	1.88524	2.39826	2.61729	2.83221
Cfap161	3.2114	1.22055	3.54311	2.48319	-2.01667	-2.01667	-1.774	-1.04771	-2.01667	-2.01667	0.113882	-0.720139	1.26739	1.74742	1.13558	1.076
Tusc5	2.61512	2.55807	2.29147	2.82208	0.541898	-0.14484	-0.259107	-0.0634934	0.410107	-0.140777	-0.589372	-0.951592	0.528165	0.268059	0.242574	-0.360566
Itgb6	3.32861	1.79025	3.30481	2.08925	1.04283	1.74247	0.682708	0.737046	0.918113	0.429713	-2.01667	-1.56872	-1.37703	-2.01667	-1.62093	-1.32535
Coq8b	6.75017	4.51193	6.84893	6.16042	3.44949	3.07332	3.31243	3.27967	3.78533	3.37374	3.62699	3.56733	3.9025	3.7704	3.92815	3.73059
Hipk2	4.7496	3.73921	5.51733	6.22173	1.83641	2.22057	2.36065	2.50819	2.07492	2.30444	1.80024	2.74964	3.41063	3.14741	3.16718	2.64341
Efcc1	4.70694	2.17004	6.55293	5.52122	1.41394	1.20982	1.63179	2.09404	1.51153	1.39512	3.44539	2.62893	3.48949	3.52263	3.17965	3.48846
Lif	3.38383	1.10886	0.889821	1.08734	-0.413542	-0.14484	-0.339459	-0.0634934	-0.922599	-0.793157	-0.0324478	-1.22741	-0.500768	-0.462639	-0.0172606	-0.962986
Tmcc2	8.76988	9.01297	8.85558	9.42767	5.72598	5.91747	5.87609	5.74102	5.75728	6.01727	5.97914	6.31157	6.76194	6.84066	7.22358	6.68523
Ndufaf8	7.48687	4.18705	7.65329	7.2014	3.12241	3.90598	4.53309	4.49108	4.10711	3.84047	3.25347	4.05511	4.97518	4.60957	5.21793	4.89521
Tsen34	8.41142	6.95651	8.57267	8.48898	5.71772	5.56647	5.6632	5.64878	5.84737	5.41867	5.84673	5.54181	4.88156	4.99232	5.33824	5.48293
Acvrl1	11.1787	11.1552	10.8453	11.2423	8.48681	8.81278	8.32078	8.30214	8.5917	8.60961	8.34967	8.88182	8.09868	8.13639	7.6206	8.16013
Nsmce3	8.36758	6.72634	8.38955	8.67598	5.29016	5.39355	5.56039	5.54293	5.51085	5.26347	5.57707	5.33225	5.38843	5.37158	5.65757	5.90576
Ano6	10.0973	8.36101	10.4622	10.4745	7.81749	7.78006	7.74482	7.74876	8.15605	8.07858	6.93753	7.03028	5.97583	6.12667	5.95651	6.24684
Riox1	7.27684	6.97454	7.30028	7.55332	4.63373	5.28654	4.9471	5.07075	4.55598	4.73966	3.4315	3.78071	4.12021	4.49177	4.4523	4.60673
Fam114a2	8.36587	6.7216	9.44222	9.11059	6.21301	6.31127	6.15526	6.22909	6.13985	6.00826	6.0422	6.16911	5.66293	5.36322	5.76287	5.79465
Cyth4	6.01191	2.88065	4.62976	4.03774	2.09637	2.06738	1.52238	1.24888	1.31647	1.08192	1.96358	2.89634	2.65853	2.63894	2.48284	2.28711
Ppie	8.56415	6.39398	7.89989	7.69355	5.64698	5.48411	5.58645	5.61435	5.33587	5.06288	4.93643	4.88215	4.52051	4.44499	4.554	4.70664
Havcr2	3.2712	0.855625	2.95775	2.32584	-1.15654	-0.919068	-2.01667	-2.01667	-2.01667	-1.21613	-0.835841	-0.0484876	0.780608	0.942594	0.853663	1.4211
Ar	6.02933	3.54903	7.30183	6.71772	2.92608	2.72962	3.35772	3.64968	3.3982	3.37883	2.47775	3.3298	4.27207	4.27711	4.41586	4.55406
Cx3cr1	6.49827	2.55807	7.15213	5.69117	-0.231908	0.882489	0.682708	-0.0634934	-0.237782	-0.083612	2.81385	3.23647	4.53774	4.58101	4.75491	5.21732
Rps8	9.23813	6.87029	8.36498	9.002	5.78252	6.07247	5.73117	5.74102	5.45133	5.39372	5.48593	5.56119	6.33163	6.30751	6.23421	6.36788
Dhrs7b	8.04464	5.6756	7.84897	7.26341	4.71897	4.93004	4.71815	4.64908	4.5287	4.19255	4.75314	4.66396	4.83353	4.71847	4.97839	5.16636
Esrp2	3.08382	2.4704	2.26635	1.20499	-1.15654	-1.2011	-1.38484	-0.473252	-1.61153	-2.01667	-0.0324478	1.55898	-0.243641	0.942594	-0.943081	0.212465
Taf15	9.74661	8.77902	10.2462	10.3701	7.44049	7.27618	7.38381	7.35527	7.49155	7.10105	6.79564	6.90373	7.23309	7.18942	6.95454	7.25852
Chfr	7.54858	5.19443	7.92318	7.74667	4.89535	4.5336	4.68806	4.59361	4.69412	4.86655	4.25846	4.63291	5.21005	4.99232	4.83987	4.0677
Il17rd	7.08608	6.8213	8.40582	8.85686	5.90641	5.82251	5.67348	5.97064	6.0624	6.11894	4.71352	4.90399	4.34566	4.06664	3.9058	3.90897
Phldb3	3.01553	1.22055	2.34044	2.87274	-0.864286	-0.683257	-0.182995	-0.473252	0.410107	0.777012	0.858194	0.0798758	-1.06815	-0.462639	-0.334402	-0.163589
Mycbp	6.57738	4.6279	7.61026	6.69175	4.01457	4.35974	4.10242	3.9876	4.01359	3.86245	3.98177	4.09364	3.95902	3.95978	3.86004	4.08718
Phc2	9.91657	8.45536	10.3028	10.0197	7.43125	7.74513	7.3137	7.33428	7.41403	7.57101	6.81449	7.24488	6.54832	6.38803	6.52984	6.54498
Tsfm	8.16577	6.36236	8.06516	8.12679	5.19815	5.56647	5.55623	5.67574	5.14326	5.10652	4.60013	4.74849	4.81716	4.90284	5.17029	5.03213
Trnau1ap	8.73314	5.60274	8.62549	8.22756	5.98881	6.10826	5.98939	6.05007	5.78794	5.45409	4.97045	4.80994	4.91271	4.98143	5.05316	5.06032
S100a8	4.98208	2.81098	4.82307	6.15385	-2.01667	-1.2011	-1.38484	-2.01667	-1.29557	-0.541485	1.01544	3.29054	3.29379	2.58243	4.44457	3.82253
Cmah	3.48831	3.24001	2.52123	2.06456	0.43846	1.08765	0.90824	1.38581	0.790269	1.22455	-0.835841	-0.189397	-0.409871	0.268059	-1.05553	-1.19419
Samd1	7.8671	6.53299	8.61961	8.69985	5.88444	5.89943	5.21842	5.31325	5.78584	5.63633	5.14657	5.41976	5.06705	5.03506	5.37938	5.64501
Rab20	5.74296	1.82601	5.59758	4.74349	2.98233	3.29656	3.23824	3.09226	2.81917	2.73614	2.14475	1.37103	1.26739	0.268059	0.822187	0.9681
Cavin1	13.5567	12.49	14.7371	13.8589	12.0663	11.8455	11.8229	11.8504	12.2667	11.8089	10.199	10.2784	8.86378	8.85557	9.20769	9.48793
Prkar2a	8.77247	6.84001	9.89941	9.30431	6.21497	6.57838	6.52646	6.43248	6.66849	6.75726	6.33114	6.55188	6.07457	6.0764	6.14002	6.27965
Rpl14	8.98604	6.1844	8.58288	8.46868	5.26393	5.53467	5.53808	5.50585	5.01329	5.05335	5.34855	5.55843	6.13148	6.15601	6.18557	6.34919
Tgif2	4.7496	2.66065	4.72965	5.13754	1.87654	2.22057	2.14134	1.92456	1.49111	2.14617	2.24345	2.13294	1.73399	1.26334	1.66541	1.93256
Ap5b1	4.90867	2.40097	4.49025	3.41232	1.41394	1.42692	1.71372	1.62592	1.49111	1.37487	0.938958	2.19095	1.44836	1.40041	1.21043	0.995841
Pctp	6.47302	4.04255	6.87513	6.58184	3.82251	4.16202	4.41561	4.27889	3.68554	3.95403	3.35997	3.30374	2.69993	2.93816	2.94409	3.28426
Atxn7	6.90918	4.81302	8.33131	8.40586	5.62064	5.34771	5.12793	5.22474	5.33444	5.631	4.23466	4.57962	4.7669	4.89126	4.42375	3.96267
Adgra3	6.60087	8.01342	7.81146	8.21744	5.62064	5.66588	5.22542	5.05029	5.37261	5.41867	4.80793	4.83744	4.868	4.71847	4.65795	4.95473
Cib1	8.63699	6.49323	8.54323	8.01725	5.73692	5.6335	5.63719	5.32181	5.57652	5.27307	5.63579	5.37979	5.28339	5.29452	5.36716	5.60953
Hsd11b1	4.7496	4.39776	6.39961	6.19282	1.87654	2.33239	1.07251	1.09759	1.68332	1.65231	2.67927	3.06093	3.63001	3.91471	3.89071	4.51385
Rpl41	9.30671	6.26314	8.64937	8.37136	5.65853	6.1451	5.95506	6.13994	5.54096	5.35806	5.39223	5.44083	6.04475	6.02961	6.06217	6.11154
Gja5	8.55064	7.23611	8.96942	8.446	6.49504	6.76932	6.52717	6.5896	6.61702	6.63912	4.24263	4.77243	2.65853	2.63894	3.07671	3.49333
NA	4.39381	1.37337	4.11433	3.44618	0.327029	0.553777	-0.0418523	0.516171	0.0681271	-0.327263	1.2863	1.37103	1.77331	1.93964	1.80076	1.40049
Pcyox1l	7.25108	4.5658	7.71204	6.89495	3.88286	4.31279	3.9289	3.85234	3.87077	3.82562	3.63913	3.26376	4.92149	4.80745	5.14029	5.18455
Dnajc1	7.37208	5.95937	8.93571	8.4051	5.62064	5.58069	5.59998	5.5208	5.58135	5.3709	5.50926	5.41672	4.9646	5.26789	5.10966	5.3224
NA	4.5944	1.37337	3.63431	3.64249	0.813998	1.7824	1.10324	1.09759	1.09086	1.31235	0.246726	0.675177	0.331422	1.11186	1.59266	1.4211
Msl1	10.0707	8.07833	11.2481	10.9284	7.61223	8.12345	7.91736	7.97996	8.15544	7.94802	7.15282	7.51421	7.87207	7.90251	7.94285	7.93661
Borcs6	7.36524	5.87013	8.17471	7.65814	4.79946	4.90765	4.9702	5.1009	5.05909	4.85563	4.51048	4.7819	4.47652	4.78258	4.94224	4.98965
C5ar1	3.43701	0.855625	2.87706	2.45496	0.327029	0.356267	0.463427	0.255258	0.452959	0.218669	-0.378929	-0.720139	0.277738	-0.0515152	0.334682	-0.360566
Dok2	3.2712	1.79025	1.43195	1.74525	0.206265	-0.14484	0.0867046	-0.473252	0.0681271	-0.793157	-0.589372	-0.345575	0.617312	-0.0515152	-0.407146	-1.19419
Soga1	6.57738	6.08828	7.44165	7.7681	5.48769	4.99521	4.73786	4.7025	5.01508	5.32677	3.34523	3.30374	3.91574	3.7704	3.58794	3.39779
Snupn	7.12711	4.80408	6.9735	6.67808	3.90243	3.98511	3.88538	3.94391	3.83071	3.31649	4.2663	4.09364	4.24085	3.74488	4.49783	4.12849
Fkbp14	6.57738	7.88104	8.24913	8.1466	5.86212	5.05756	5.08432	5.1009	5.9519	5.93667	5.59587	5.14683	4.14291	4.08709	4.71476	4.64666
P2rx4	6.81187	6.11743	7.90397	6.48455	3.8122	4.06822	4.30432	4.44481	4.03843	4.13048	4.54958	4.46674	4.57994	4.79507	4.41058	4.64227
Unc13d	4.44663	3.1155	4.04215	3.85901	0.728875	1.65913	1.47618	0.928552	2.00464	1.41509	0.113882	1.09536	1.51947	1.74742	1.73467	0.85147
Itga2b	4.64047	1.46694	3.95835	3.34727	0.894376	1.32245	0.313839	1.38581	0.612674	0.468455	1.08807	1.46806	1.49616	1.52559	1.3494	1.35837
Polr3gl	7.49001	6.81019	8.33206	8.30422	5.25253	5.44732	5.57964	5.47548	5.51085	5.59644	5.15504	5.15414	4.88156	4.95941	4.9926	4.74188
Erbb2	7.49316	5.53413	7.63623	7.08995	5.0699	4.97381	4.84172	4.80374	5.1804	5.18567	4.1941	4.10122	3.62465	3.29539	3.66979	3.7592
Gan	7.119	4.985	8.04499	7.69556	4.54936	4.24296	4.30432	4.3307	4.55106	3.92647	4.16921	4.2789	5.47297	5.58077	5.24637	4.80792
Vegfd	1.75827	3.2532	4.32366	4.22767	-0.621382	0.356267	0.0238576	0.516171	0.0119157	-0.262385	1.15722	0.968425	2.1321	2.26098	1.70046	1.55766
Ttc39c	3.48831	5.89138	5.00874	4.10891	1.17742	0.127362	0.83691	0.928552	0.574372	-0.395196	2.65556	2.71052	3.34689	3.49228	3.18585	2.94324
Rara	7.43552	6.92491	6.95985	7.69154	4.82532	4.8096	5.04925	5.13044	5.03813	5.27717	4.53016	4.67924	3.9245	3.91471	4.04183	4.35691
Tuba1b	9.70792	7.64681	9.09625	8.61961	6.70182	6.9793	6.59495	6.47914	6.34716	5.99588	5.88035	6.01304	5.96844	6.019	6.42308	6.38109
Akna	6.22346	5.13152	6.91205	7.29792	4.22348	4.20673	4.34023	4.49108	4.87832	4.36159	3.53905	3.44155	3.3338	3.61003	3.02235	3.38736
Ces1d	5.48967	6.2566	5.50127	5.08018	3.83275	4.37288	4.30432	4.49108	3.46776	3.41399	-2.01667	-1.22741	-1.77059	-2.01667	-1.05553	-1.46965
B3gnt7	1.91643	0.855625	3.41179	1.15908	-2.01667	-1.552	-0.424552	-2.01667	-1.16025	-0.793157	0.858194	-0.520735	0.701269	-1.0398	0.334682	0.304076
Dnali1	3.43701	1.63764	2.8091	2.79231	-1.52343	-0.919068	-1.774	-2.01667	-1.79992	-2.01667	-0.195312	-0.951592	1.8116	1.40041	1.37131	1.20043
Mmp14	8.24805	6.19811	9.22123	9.08789	5.22171	4.70441	5.41796	5.39665	5.03284	5.52012	6.88626	6.56702	5.66031	5.53684	6.40991	7.07481
NA	4.16075	1.51155	2.43367	1.776	0.813998	0.458399	0.260319	1.38581	0.494576	0.124774	0.772638	0.90051	-0.167197	-1.0398	-0.407146	-0.226307
Ucp2	6.31153	11.6232	8.17386	11.849	8.37614	8.35789	7.9782	8.01337	8.32417	8.34133	8.85144	8.82913	7.22336	7.25642	7.71948	8.47023
Enho	7.85982	6.40732	8.13579	7.88356	2.98233	3.377	4.09097	4.18817	3.3761	3.0553	4.2663	4.70436	6.31673	6.08659	6.45998	5.99179
Ldlrap1	8.44589	6.19298	8.89428	8.51754	6.60661	6.61478	6.27141	6.22454	6.28032	6.39954	4.68453	5.02055	4.23733	3.79548	3.63851	4.29126
Ndufa5	10.1579	7.12027	10.2659	10.3308	6.38632	6.78292	7.3669	7.34901	6.50503	6.20391	6.82781	6.47078	7.61228	7.59852	8.07453	8.45282
Agtrap	8.08685	7.13994	9.02267	8.76225	6.00021	5.92641	5.94131	6.03973	6.27511	6.07019	6.30852	5.81514	4.92149	4.98143	5.36306	5.61737
Fam46a	6.75017	3.51657	7.19437	7.1221	2.74283	3.0242	2.98961	3.27967	3.05996	3.28428	5.42765	3.88103	4.11639	4.31229	4.1786	5.30448
Erp29	9.71062	7.8058	10.3032	9.84954	6.97795	6.86888	6.96374	6.9263	6.99279	6.79966	6.91649	6.64302	7.27179	7.29869	7.47924	7.58362
Sbno2	7.43878	5.67805	7.48109	6.84326	4.90022	4.84303	4.32402	4.18817	4.7008	4.78449	4.15237	4.63291	4.25133	4.38017	4.07559	3.47866
Pnp2	2.78883	0.365959	3.07814	1.89283	-0.621382	-0.00232876	-0.51498	-0.473252	0.0119157	-1.48555	-1.13327	0.197745	-0.500768	0.529523	0.580235	0.11464
Dync1h1	11.4613	9.2868	11.6102	11.6486	9.05856	8.94895	8.46858	8.40844	9.0464	8.61501	7.27744	7.7853	9.24733	9.23074	9.03203	7.40052
Nradd	6.02065	4.18705	4.04953	5.3845	1.75264	2.38521	2.22754	2.92256	1.44939	1.43479	3.47278	3.26376	2.53812	2.63894	2.87675	2.47623
Rbm4b	6.80177	4.75855	7.13922	7.11572	3.35324	3.4156	3.6298	3.41383	3.59278	3.1889	4.40781	4.37587	4.42188	4.52213	4.88055	4.88783
Spi1	3.2712	0.98779	3.25459	3.04042	-1.52343	-0.14484	0.0867046	-2.01667	-1.29557	-0.989199	-0.835841	0.754263	1.34774	1.52559	0.580235	1.29279
Katna1	7.66739	5.38329	7.92318	7.74132	5.08711	5.30379	5.1775	5.2785	5.2166	4.84647	4.71924	4.87774	4.36188	4.31229	4.51516	4.40684
Lrrc51	3.01553	2.14195	5.10045	3.96955	0.206265	0.458399	0.641438	0.928552	0.0681271	0.389902	1.80024	1.09536	2.58307	2.1871	1.95383	1.63026
NA	4.92738	-2.01667	-2.01667	4.03774	-2.01667	1.02245	1.79124	1.24888	-2.01667	0.506184	-1.50838	0.591502	1.90308	2.10924	-1.45749	2.30939
NA	4.96407	5.87013	4.13529	4.0218	1.17742	1.52433	1.67333	1.24888	1.14413	0.468455	2.2113	2.62893	3.5071	3.18585	2.95864	3.38211
Krt80	4.39381	5.19443	3.24176	3.75481	1.04283	2.68818	0.761868	-1.04771	1.19551	2.16987	3.7663	2.93079	-0.167197	-1.0398	-0.199072	0.656684
Grtp1	4.16075	5.63586	4.7158	3.85901	0.541898	1.32245	-0.611457	-0.473252	0.12223	-0.887851	3.88317	2.60779	2.66899	3.10792	2.89199	2.55294
1810024B03Rik	3.58572	1.16578	4.35974	3.47925	0.206265	0.356267	0.0867046	1.38581	0.12223	0.26342	0.368363	0.675177	1.71392	1.74742	1.18591	1.68241
Nudt16l1	8.48113	6.0809	9.02805	8.92693	5.42819	5.39355	5.47927	5.36387	5.42467	5.32545	6.28746	6.12887	6.22131	6.22685	6.41783	6.51474
Syk	5.48967	3.76707	4.53301	4.27956	2.80654	3.05713	2.83345	2.09404	1.94585	2.62049	-0.589372	1.68544	1.65197	2.33125	1.08343	0.995841
A4galt	7.6646	7.76781	7.66475	7.70857	3.63639	4.14681	3.9289	4.29637	3.58798	4.01746	6.6975	6.47225	4.8242	5.03506	5.24637	5.35757
Pex11g	4.79104	3.51657	4.81443	4.50048	2.42877	2.24935	2.59487	2.31592	1.96077	1.8849	2.14475	1.55898	1.42386	1.26334	1.45578	1.35837
Plscr3	8.86755	9.15242	8.92671	9.30225	7.26264	7.22729	7.11791	7.03441	7.07739	7.13418	6.0238	5.68494	5.07297	4.93705	5.05992	5.3224
NA	6.16949	4.653	5.82753	5.88786	3.26529	3.24032	2.70914	2.67782	2.85156	2.61186	3.63913	3.31683	3.18134	2.69332	3.48617	3.88321
AA986860	3.43701	4.53372	4.69241	4.50278	1.79514	1.7824	1.19166	1.62592	1.93077	2.00836	1.75634	1.42036	2.27594	2.10924	2.18174	1.69938
Hey1	9.27602	8.87229	9.80647	9.50535	7.48983	7.43962	7.35458	7.34691	7.52174	7.2083	6.1627	6.4049	5.86984	5.80107	5.7814	5.80645
Prdm1	5.79481	4.26727	5.90079	7.6229	4.45974	4.96082	4.50172	4.67603	4.52117	4.84463	0.858194	1.03329	2.43153	1.93964	1.41417	1.51994
Birc2	8.25177	6.16881	8.42368	8.44196	5.93994	5.93086	5.66835	5.78501	5.83324	5.49219	5.50595	5.3704	5.13278	5.2857	4.92383	4.78426
Ddx28	6.96003	4.41547	7.14956	6.86219	4.12697	4.10017	4.2297	3.85234	4.07318	3.76855	3.97221	3.79947	3.95046	4.49177	4.14083	4.60898
Egflam	6.5414	6.7786	7.65873	7.78803	2.37376	2.8283	2.50569	3.3144	2.06113	1.78101	5.63579	5.4994	5.4428	5.55897	5.36306	5.92302
Mal2	8.18144	5.69265	8.47256	8.13144	-2.01667	0.458399	-2.01667	-2.01667	-1.44492	-1.34456	5.70671	5.3704	6.61003	6.59143	6.68444	6.7949
Ankrd33b	7.07773	8.17249	7.29408	8.08481	4.97606	5.86265	5.26162	5.35555	4.48291	5.66788	4.98002	5.56119	4.87479	4.93705	4.88246	4.94053
Ephb3	5.85467	4.15226	5.6855	5.81293	0.638414	0.643238	1.32797	1.09759	0.649985	0.578804	2.45047	2.99733	4.02973	4.32956	4.35393	3.78328
6820408C15Rik	3.88266	0.98779	3.56388	3.23556	-0.413542	0.356267	0.0238576	-2.01667	-0.626509	-0.620596	-0.378929	-0.0484876	2.07029	1.84673	1.78452	1.27025
Cdipt	10.1554	8.14001	10.7833	10.4231	7.95269	7.86562	7.83739	7.84543	7.92087	7.69717	7.1153	7.17294	7.23045	7.2766	7.34656	7.75169
NA	7.73796	6.18095	6.51743	7.56245	4.7678	5.05348	4.51035	4.5794	4.7008	4.66657	4.25057	4.32497	4.34566	4.42906	4.59881	4.93516
Krt19	3.99332	4.20753	4.98198	4.54132	0.638414	0.954167	1.27499	1.92456	1.36215	1.81146	3.55194	2.0725	1.12264	1.26334	2.06558	2.72026
Pla2g12a	7.36524	4.85257	7.35939	7.48779	4.52432	4.80477	4.79073	4.94341	4.59238	4.51982	4.31251	4.31196	4.2232	4.55187	4.34288	4.36491
Ikbip	7.07773	5.42177	8.08236	8.0719	4.66271	4.64609	4.89537	4.85182	4.76172	4.96805	5.32245	4.92977	4.96884	4.84396	5.11616	5.32923
Mum1	9.11402	6.49045	8.79429	8.33471	6.42573	6.67436	6.28822	6.13022	6.50567	5.96574	5.34114	5.5446	5.64051	5.37158	5.07836	5.1024
Hoga1	1.5806	2.97922	2.47811	1.8645	-0.0706064	-0.302987	-0.424552	-0.0634934	-0.817005	-0.140777	-0.589372	0.502674	0.481437	0.750792	-0.483753	0.258998
Ankrd17	8.37271	6.39695	9.9807	9.11971	6.43584	6.15083	6.32615	6.33013	6.52838	6.37998	6.04676	6.2309	6.68283	6.65789	6.44068	6.79884
Ncf4	2.05896	0.459997	2.16123	1.13556	-0.231908	-0.683257	-0.611457	-1.04771	-0.922599	-1.64182	-1.50838	-2.01667	0.481437	-0.462639	-0.943081	-1.07396
Hoxb3	1.37794	2.59998	3.0192	2.61658	0.541898	0.643238	1.07251	0.516171	0.612674	0.951248	-0.835841	-1.22741	-0.243641	-2.01667	-0.199072	-1.62999
Snrpd1	8.51244	6.9104	8.87882	8.62001	5.65853	5.48108	5.77715	5.83968	5.43539	5.29074	5.64184	5.54737	6.02859	6.0764	6.2762	6.783
Sf3b6	8.88559	7.13994	8.97549	9.2339	6.04711	6.16789	6.1087	6.05007	6.06067	5.88301	6.37352	6.22224	6.28986	6.15601	6.51516	6.68735
Ip6k3	2.18866	3.72033	2.66274	3.24108	0.728875	1.02245	0.942625	1.09759	0.612674	0.542951	0.858194	1.64451	0.221979	-1.0398	0.289363	0.0631221
Lipg	1.14208	3.47213	1.60226	2.5647	-0.0706064	-0.919068	-0.259107	-2.01667	-0.107538	-0.704298	-0.0324478	-0.520735	1.09187	1.11186	0.723417	0.656684
B4galt1	8.5	7.01189	8.92972	8.91067	6.36179	6.34165	6.62371	6.43643	6.64154	6.93721	5.37056	5.62833	4.66604	4.60957	4.55878	5.05043
Bdkrb2	5.66709	5.76352	6.0845	5.73193	3.68239	2.1912	2.83345	2.92256	2.75212	2.75193	5.01304	3.46525	2.28957	2.8924	2.542	3.7098
Pik3cd	7.43878	4.36166	6.29945	6.61145	3.83275	4.71476	4.29437	4.42905	4.52117	4.32247	2.72554	2.58633	4.16155	3.95978	4.06554	3.1175
Psmb4	10.7618	8.9006	11.1955	10.603	8.18664	8.11223	8.21903	8.17327	8.17677	7.63467	7.77766	7.7344	7.93682	7.90539	8.25333	8.48637
Xpnpep2	2.61512	4.53372	3.66347	4.18248	-0.621382	-0.919068	0.0867046	-0.473252	-0.307596	-0.262385	3.17228	2.86104	1.15278	1.52559	0.822187	2.36363
Arap3	10.2275	9.89234	10.4934	10.998	8.84668	8.93822	8.43274	8.51772	8.84885	8.66538	6.36075	6.84057	6.20792	6.28997	5.65199	5.84509
Gpat4	9.25396	7.31215	9.82648	9.46235	6.85027	6.88617	6.81101	6.74406	6.89274	6.7341	6.41117	6.55188	6.63159	6.43666	6.74182	6.80767
Lamtor2	8.8505	7.22945	9.20314	9.39956	5.91847	6.20876	6.1303	6.03973	5.82409	5.58986	6.48699	6.24979	6.56872	6.47208	6.90282	7.23652
Tnfaip2	6.84668	3.42627	5.76164	4.89124	4.32122	3.86937	3.93745	3.75457	3.6629	3.70102	2.72554	2.35217	1.83036	0.750792	0.723417	2.38477
Gigyf1	7.45176	5.88716	7.69684	8.00594	4.70232	5.12122	4.54992	4.85182	5.09335	5.04216	4.4838	4.75331	5.35156	5.55897	5.05486	4.32172
Itga2	1.14208	4.8219	2.77388	2.33619	2.12996	1.74247	1.82849	1.92456	0.686355	1.8849	-1.13327	-2.01667	-0.935421	1.11186	-1.3107	-1.62999
NA	8.9499	7.12656	9.03062	9.13526	6.20319	6.30614	6.36866	6.45211	6.09574	5.9384	6.12003	6.07981	6.08633	6.04014	6.4689	6.67239
Pld4	4.68512	1.55481	3.77455	3.37766	1.41394	0.807063	0.799877	0.255258	-0.046575	0.0243403	0.584616	1.15487	2.19137	1.74742	2.03844	1.78136
Rcc1l	7.17877	4.65797	7.30337	7.11572	4.65696	4.66223	4.74031	4.7413	4.08685	4.28226	4.10064	4.08602	4.36188	4.55187	4.04524	3.78725
Tpm3	9.4901	8.85886	9.63105	9.46132	7.48091	7.32432	7.20857	7.21986	7.53707	7.11256	6.67409	6.82577	5.86074	5.78237	6.13283	6.20956
Hmbox1	8.18533	7.46243	8.62178	9.34957	5.96574	6.06034	5.73485	5.85155	5.89671	5.86588	6.23645	6.19237	6.38893	6.30751	6.08721	6.12416
Kctd2	8.3846	6.49184	8.99426	8.86358	5.6058	5.88116	6.16257	6.06544	5.96769	6.02704	5.39581	5.51935	6.1134	6.1316	6.16062	6.21178
Gon4l	7.4742	5.04692	7.97305	7.70957	4.88555	4.85244	4.76213	4.79147	5.05388	4.77486	4.81864	4.851	5.36127	5.18492	4.84771	4.42736
Mob3c	6.40124	5.04313	6.36305	6.72463	4.24663	4.51594	4.12879	4.24328	4.34752	4.40966	3.10387	3.51151	2.95208	2.26098	2.77356	2.50548
Bst2	11.1416	9.94525	10.6927	11.3434	9.24014	9.29077	9.17401	9.18209	8.7724	8.99296	7.13579	6.84735	6.65547	6.54043	6.551	7.12984
Il6ra	6.52921	4.73052	6.61395	6.98365	3.20353	2.70905	2.97307	2.82958	3.52912	2.91508	4.61249	5.42883	4.04186	3.93742	4.0689	4.21069
Tnrc18	8.44751	6.91871	8.83704	8.9613	6.084	6.08849	5.81708	5.83371	6.41511	6.4293	5.63579	5.8871	5.91669	5.71168	6.07474	5.79663
Mapt	10.0018	9.46676	10.5005	10.5208	3.99648	4.86179	4.54713	4.53592	3.83477	4.01746	6.97631	7.56993	9.02762	9.00816	8.90211	9.09414
Dennd2d	3.7628	1.96079	3.4232	3.00841	1.30053	1.02245	1.61056	0.516171	1.17005	1.31235	-0.0324478	0.0798758	0.277738	-0.462639	0.42126	0.431431
Pim1	6.64674	5.44208	6.70909	6.08798	4.52432	4.41794	4.30762	4.13087	4.57308	4.81487	3.15548	3.46525	2.20581	1.93964	2.16929	2.4056
Col7a1	5.21306	1.04959	3.20256	3.46044	-0.413542	-0.302987	-1.38484	-2.01667	-1.79992	-1.48555	1.40478	0.306708	3.21028	3.63803	1.8327	-0.360566
Arid2	8.42136	6.70369	8.74142	8.65829	5.88689	5.86962	5.68113	5.88659	6.31413	6.05515	5.64485	5.4557	5.8845	5.75067	5.77935	5.75563
Tmem164	8.17753	6.5558	8.73256	8.62925	5.73146	5.92418	5.98939	5.84563	6.13821	6.24145	5.92317	5.77304	5.07691	5.07657	5.37802	5.51084
Depdc7	2.61512	3.01064	3.00408	3.23556	-1.15654	-0.14484	-0.51498	-2.01667	-0.458258	-1.21613	1.08807	0.502674	1.71392	1.26334	1.66541	0.85147
Fignl2	4.81133	3.78535	5.97827	5.88345	3.46274	3.59448	3.32551	3.05167	2.93706	3.66395	1.88422	2.19095	2.50346	1.74742	2.53231	2.2063
Rpa2	7.65341	5.85506	7.54777	7.9074	5.0699	5.19705	5.24621	5.34719	4.92282	5.05812	4.66685	4.91264	4.72489	4.69201	4.52497	4.85033
Setd1a	5.71093	4.55519	6.78513	6.76543	3.61282	3.75361	3.46215	2.87682	3.82257	3.5824	3.25347	3.35539	4.31933	4.41294	3.9392	3.6673
Rbm6	8.42136	6.23349	8.08055	8.32467	5.39403	5.46277	5.49238	5.64878	5.54591	5.41371	5.03617	5.36411	5.8721	5.97028	5.59842	5.05703
Lig1	7.18266	4.8569	8.13579	7.43789	5.49093	5.0453	5.50825	5.66904	4.95299	5.31087	3.99127	3.80877	4.14666	4.16613	3.8287	4.16865
Lrrc32	7.79763	8.59307	8.31417	7.9268	5.60878	6.19588	6.18069	6.23817	6.01225	6.47044	5.36691	5.78486	4.71735	4.84396	4.69752	5.26227
Rnf141	8.33468	8.80501	8.76991	9.12261	6.21105	6.25028	6.23978	6.20616	6.18504	6.51854	6.89388	6.69155	5.99571	6.0815	6.15431	6.16902
Bcl2l1	9.99236	9.89366	11.4348	10.5517	9.24829	8.11517	8.08283	8.06272	8.71455	7.83975	8.34967	8.12504	7.44084	7.42659	7.65868	7.43765
2510039O18Rik	8.49374	7.49542	9.01656	8.91013	6.52375	6.52936	6.47966	6.55007	6.64789	6.60964	5.62972	5.77541	5.37411	5.44473	5.34518	5.54645
Kctd14	2.41759	0.459997	3.76562	3.30045	-2.01667	-2.01667	-1.56634	-1.04771	-2.01667	-1.64182	-0.195312	0.306708	1.51947	1.64076	2.30071	1.02306
Rbm34	7.17094	4.42716	7.47081	6.5813	4.53062	4.3988	4.5246	4.55056	4.28663	4.18965	4.30491	3.99125	4.41878	4.27711	4.19713	4.05787
Dhcr24	7.61643	7.09026	7.98561	7.78118	4.37824	3.83181	4.13252	4.24328	3.802	3.71317	5.27656	5.61515	6.11244	5.96477	6.05457	5.82106
Bmp4	8.97933	7.19738	8.66508	8.88424	5.69826	5.74632	5.68113	5.61435	6.39189	5.82168	7.30054	6.77334	4.73239	4.7053	5.80474	6.87036
Ccr1	-2.01667	0.98779	2.8091	0.78878	-0.864286	-0.683257	-0.424552	-1.04771	-1.61153	-1.48555	-2.01667	-1.22741	0.0404743	-0.462639	-0.483753	-0.962986
Arsj	-2.01667	3.82123	-0.773009	0.411871	-0.621382	-1.2011	-0.51498	-1.04771	-0.718615	0.0243403	-0.835841	-0.520735	0.221979	0.750792	0.0385851	0.757362
Rp9	7.29135	6.08275	8.53009	8.30042	5.40779	5.70796	5.83664	5.98149	5.66802	5.405	4.46347	4.90399	5.00852	5.09688	5.15458	5.20549
Clec14a	9.68062	10.7954	10.9223	10.9525	8.7538	9.12694	8.7903	8.87187	9.3132	9.15908	5.98629	7.19791	5.90346	5.84976	5.92166	6.40133
Epha2	7.1432	6.57431	7.42756	7.40906	5.59682	5.31745	5.27686	5.40473	5.87619	5.54412	2.0388	3.15137	3.23162	3.25979	3.19202	2.02969
Hint2	7.97667	5.81113	8.21917	8.27323	4.73543	4.84303	5.35553	5.44446	4.79125	4.37694	5.28431	4.7629	5.73192	5.83774	5.92537	6.29439
Serpine1	5.62187	7.22694	5.80154	5.62831	5.67	4.36632	4.07555	3.92156	4.89396	4.03369	2.63147	2.45044	0.617312	0.268059	1.87932	0.995841
Wdr83os	7.64213	6.29538	5.87401	6.91062	4.63373	4.8383	4.87103	4.83995	4.33038	4.34867	4.27411	4.357	3.84828	3.98179	3.93184	4.07747
Parp11	5.92151	4.16627	7.4879	7.22353	4.63958	4.44307	4.14733	3.94391	4.49064	4.69951	4.18585	3.63158	4.18726	4.22269	3.86004	3.89799
Dcp2	7.53949	5.79092	8.86424	8.79979	5.93519	5.8926	5.76158	5.62822	6.045	6.46086	5.19259	5.58842	5.42284	5.55163	5.51475	5.28775
Wwc1	7.46783	5.40118	7.04634	7.03699	-1.52343	0.553777	-1.22365	-2.01667	-0.922599	-0.466487	4.49052	4.81456	5.83774	5.71168	5.86776	5.51564
Blmh	8.98492	6.422	9.34695	9.07713	6.87028	6.53521	6.63624	6.62115	6.77945	6.53289	6.13725	5.96189	5.8653	6.02961	5.87353	5.98402
Scx	3.38383	0.365959	3.13477	3.3676	-0.621382	-0.14484	0.313839	0.255258	0.365942	-0.2003	0.246726	-0.720139	0.927286	0.529523	1.75148	1.51994
Sowahc	6.20824	3.67202	6.72301	5.86033	2.80654	2.33239	2.96473	3.27967	2.65452	2.91508	3.45915	3.42955	4.15412	4.24106	4.09876	4.30795
Fam193b	8.60394	4.50091	6.90495	6.55217	4.40592	4.69398	3.74631	3.64968	4.03138	3.56015	4.70199	4.96345	6.12959	5.95367	5.34241	4.07422
Vhl	7.75638	5.23157	8.28319	8.13051	4.77843	5.0121	5.12419	4.80374	5.15629	5.33466	5.59898	5.56119	5.32699	5.19438	5.58676	5.67963
Flywch1	6.60087	3.21326	8.11042	7.23706	4.36419	4.53943	4.33052	4.20678	4.45946	4.85563	5.09463	5.49652	4.34892	4.00348	4.58949	4.58407
St5	7.93799	8.48677	8.45946	9.04376	6.22472	6.56842	6.39761	6.39647	6.34503	6.45605	6.01451	5.8583	5.69784	5.89107	5.65311	5.24648
Rpl27a	8.10545	6.02623	7.56397	8.34276	4.60416	5.0079	5.45863	5.45228	4.92853	4.9965	4.92656	4.97588	5.63518	5.53684	5.65423	5.9534
Eln	9.22023	9.59244	9.85954	9.58517	8.08005	7.38069	7.06036	7.10306	8.38092	7.0624	6.49202	6.94856	5.98946	5.78237	6.57775	6.80081
Gdf9	2.61512	1.04959	3.70146	3.68767	0.541898	0.356267	-0.259107	-0.0634934	0.273337	-0.2003	0.480538	0.675177	1.09187	1.64076	1.0015	1.17639
Batf3	2.18866	-0.226452	2.87706	1.8356	-0.0706064	-0.919068	-0.424552	0.255258	-1.79992	-1.34456	-1.50838	-1.56872	0.103547	1.11186	-0.564657	-0.291875
Lysmd2	7.81783	8.12528	8.25633	8.51996	5.86212	6.0522	5.80661	5.79119	5.81693	5.75371	5.64184	5.51935	5.66685	5.57354	6.04608	5.78773
Ctdspl	7.2399	6.99334	7.86997	8.28046	4.53689	4.98669	5.14833	5.12066	5.71279	5.37982	5.47581	4.94671	5.46399	5.52938	5.47102	5.02205
Emsy	8.65814	6.76945	9.69438	9.31048	5.9423	6.06642	6.14052	6.08568	6.29732	6.0967	6.03073	6.19945	7.17187	7.19178	7.11697	6.98856
Gxylt1	7.13518	6.44805	8.50313	8.52464	5.82415	5.92195	6.0379	6.12534	6.08557	6.45906	4.25057	4.60117	4.6996	4.73152	4.20934	4.18982
Irf1	10.016	9.34804	9.86608	9.76567	8.18714	8.14371	7.93722	7.88784	8.1305	7.87262	6.45645	6.80037	5.5987	5.70508	5.52578	5.88458
H2-DMa	4.5224	5.73794	4.35379	3.97287	2.40153	1.61558	0.942625	1.24888	1.06347	0.978347	3.0684	2.71052	3.00259	2.4623	3.44544	3.20923
Ccl5	1.91643	3.08631	1.79026	2.77719	0.638414	0.246349	1.07251	0.928552	0.0119157	1.247	-0.835841	-0.951592	-0.500768	-0.462639	0.37862	-0.163589
Ctdsp2	10.4027	9.27715	11.0749	11.1733	8.57329	8.93074	8.87578	8.83273	8.9591	8.89826	7.7611	7.98859	6.70334	6.65447	6.69099	6.77202
Ifngr2	7.46783	7.30345	7.9277	8.28414	5.90641	5.83918	5.99759	6.06033	5.53723	5.73893	4.53016	4.62241	4.70215	4.79507	5.01887	4.72747
Pbx2	8.23872	6.38651	9.02103	8.63856	5.71219	5.94412	5.80077	5.75372	5.86731	5.99423	6.00047	6.06825	5.96526	5.93122	6.16768	6.1713
Pcid2	7.4224	5.57411	7.72708	7.31732	4.99896	4.93448	4.78837	4.81591	4.99528	4.87198	5.1165	4.90399	4.52051	4.75728	4.5492	4.30795
Tmem131l	6.28277	3.7944	5.8361	6.03335	3.82251	3.86937	3.91598	4.03001	3.52912	3.43859	1.40478	2.56455	3.59751	3.10792	2.89199	2.04305
Sh3bp2	5.15075	2.81098	4.46287	3.85181	2.40153	1.7824	1.90023	2.09404	1.78745	1.45422	2.30569	1.03329	1.75378	2.26098	1.93924	1.94684
Hemk1	6.02933	2.77484	6.34666	5.67596	2.80654	2.99051	2.79633	3.38144	2.50981	2.26097	2.74812	2.91367	4.18726	4.14677	3.79667	3.31762
Pdia6	10.2495	9.26234	10.9506	10.2387	8.68802	8.37961	8.20891	8.09553	8.53736	8.21192	7.59735	7.2602	6.85022	6.89967	7.13869	7.40828
Tslp	3.01553	0.98779	-0.115187	1.89283	-0.413542	-0.683257	-0.0418523	0.255258	-0.817005	-0.262385	-0.378929	-0.0484876	0.0404743	-0.0515152	-0.838771	-1.46965
Gm11478	9.76493	7.05019	9.15347	9.19372	6.17128	6.32654	6.63163	6.69878	6.25102	6.09361	6.37352	6.35978	7.05855	7.21984	7.09615	7.24521
Gm4841	2.41759	-0.553992	4.12834	2.69107	2.12996	0.882489	0.799877	1.24888	0.918113	0.348961	0.938958	-1.22741	-1.21434	-2.01667	-0.564657	-0.226307
Msr1	3.2712	-0.978432	2.49983	0.985776	0.327029	0.246349	-0.259107	0.255258	1.00707	0.348961	-2.01667	-1.22741	0.221979	-2.01667	-0.0172606	-1.19419
Bola2	8.22556	5.65089	7.75218	7.36265	4.83553	5.2154	4.89537	4.98712	4.73593	4.30919	4.54958	4.75811	5.4819	5.55897	5.64188	5.76775
Mme	4.33898	3.19969	4.01977	3.81156	0.541898	0.807063	0.873016	-0.0634934	0.686355	0.613788	1.66433	1.9093	2.32969	2.02693	2.3567	2.01621
Ogfod2	7.82033	5.62067	7.55492	7.2722	4.35712	4.31959	4.42476	4.42905	4.57065	4.17801	4.70199	4.63291	5.39947	5.36322	5.53915	5.63732
Pbxip1	9.25951	6.52485	9.79553	9.4371	6.30961	6.18661	6.29655	6.25614	6.3655	6.13709	7.32047	6.90914	7.03852	7.15108	7.17963	7.32837
Cog8	7.78743	5.78184	7.74709	7.27993	5.26014	5.08576	5.12606	5.19709	5.30988	4.80923	4.71352	4.64333	4.67125	4.69201	4.94224	4.81961
Capn1	8.33293	6.62974	8.7539	8.36852	6.29303	6.06034	5.58781	5.79734	6.46633	6.12654	6.08275	5.86053	4.99818	5.1754	5.29734	5.49635
Vasn	6.54746	5.03932	6.29945	6.49094	1.35835	1.93191	2.41063	2.17185	1.82055	1.74989	5.00837	4.93402	4.20174	4.16613	4.8101	4.39647
Abcg3	3.80387	2.62049	3.34136	4.95141	1.04283	1.08765	1.52238	1.62592	0.887198	0.837459	2.33583	2.32652	2.00571	1.52559	1.18591	1.48122
Kcnn4	5.05193	2.75642	4.93492	3.88745	1.91559	2.09934	2.33499	2.7302	2.12877	1.95479	2.07499	2.56455	1.42386	1.26334	0.973118	2.26448
Zbtb46	8.4081	7.12117	9.24834	9.52281	6.96172	7.19437	6.98297	7.01343	7.03791	7.45432	5.00837	6.07597	4.98149	4.97046	4.5754	5.23052
Sec61b	7.63362	5.85073	7.49332	7.63369	4.84567	5.25496	5.02137	5.06056	4.85255	4.6477	4.85552	5.08698	4.57994	4.52213	5.09656	5.21585
Nectin1	6.72901	5.23822	6.52274	6.76111	1.91559	2.41092	2.29563	2.3829	2.52997	2.5134	4.54314	4.60651	4.80535	4.66505	4.98373	5.20698
Adgrg6	5.47703	6.09562	5.50127	6.09333	2.28709	2.68818	3.1305	3.17017	3.73413	3.82562	4.3646	4.64852	2.77934	2.79629	2.75701	3.39258
Polr2h	7.22863	4.30577	6.76621	6.51221	3.3814	3.85071	4.04027	4.20678	3.59278	3.27884	4.00071	3.98306	4.45249	4.62364	4.84966	4.72333
Socs1	4.19203	1.71596	3.92662	3.7236	1.04283	1.7014	2.03381	1.73248	1.06347	1.22455	0.584616	0.408016	1.09187	1.40041	1.0015	1.44142
Fam46b	0.508984	1.86091	1.56153	-0.717329	0.327029	-0.683257	-1.22365	-2.01667	-0.046575	-1.48555	-0.835841	-2.01667	-1.21434	-2.01667	-0.199072	-1.62999
Ptpn6	4.39381	1.96079	3.90237	3.96288	-0.864286	0.356267	-0.51498	-0.473252	-0.380961	0.0754309	3.05034	1.60238	2.20581	2.33125	1.8327	1.71615
Arhgap30	3.38383	2.93077	3.68259	3.10844	0.728875	1.26723	0.942625	1.38581	0.756456	0.777012	-0.0324478	0.306708	1.90308	0.942594	0.944169	0.724577
Tbx3	8.5716	9.0529	7.08636	7.88708	6.48372	6.59249	5.93918	5.92643	6.24036	6.69583	5.13376	6.58876	5.00025	5.1754	4.64676	5.44066
C2cd2	8.42465	7.59529	9.78893	9.33028	7.24263	7.36433	6.93414	6.96507	7.55992	7.2706	5.42063	5.89584	5.67725	5.80107	5.46084	5.72488
Cln6	7.0179	5.12435	7.68623	7.16447	4.75171	4.61325	5.18828	5.05029	4.81608	4.9748	4.32758	4.21743	4.25828	4.38017	4.32334	4.54704
Edc4	8.18533	6.04152	7.95645	7.40998	5.81901	5.95727	5.54928	5.42075	5.89087	5.56103	4.99426	4.97588	4.69704	4.41294	4.35117	3.61012
Atp5g3	11.4274	9.03391	11.8349	11.7514	8.56103	8.9536	9.31315	9.3958	8.8052	8.4265	8.73116	8.50361	8.94365	8.97562	9.31837	9.50568
Pomp	10.2008	8.68661	10.5205	10.3227	7.42957	7.37824	7.54321	7.57706	7.15527	6.99723	7.91064	7.8643	7.91666	7.76804	8.16396	8.46544
E030030I06Rik	3.48831	0.365959	3.07814	2.3049	1.61709	0.882489	0.682708	-0.0634934	1.2693	0.777012	-0.0324478	0.306708	-1.21434	-0.462639	-0.943081	-0.360566
Rprml	6.59503	4.79959	6.84999	6.70529	-1.52343	-1.2011	-1.774	-2.01667	-2.01667	-1.64182	3.31529	3.71303	5.28679	5.34635	5.48616	5.77377
Faap20	7.22107	5.91855	7.59015	6.99799	4.40592	4.31959	4.24356	4.56505	4.60905	3.98776	4.69037	4.67417	5.00025	5.10693	5.19507	5.0636
Dusp23	6.65237	6.19811	6.67489	6.46876	3.64802	3.72316	3.93745	3.56569	3.70783	3.32707	4.82397	4.84649	4.07371	3.95978	4.52007	4.76222
Arrdc1	7.18266	4.53912	6.25064	6.40133	4.69673	4.59094	4.40022	4.11126	4.47514	4.27682	3.61475	3.67288	3.47764	3.66549	3.36581	2.6951
Proser3	5.10219	2.69973	3.72008	4.43936	2.09637	1.7824	1.37908	1.24888	1.70121	1.54765	1.88422	1.60238	2.1321	2.52362	2.27769	2.22986
Nectin3	6.77104	7.32626	7.41046	8.04513	5.42481	5.16342	5.35393	5.31325	5.42601	5.73893	4.37189	4.13855	4.97728	5.19438	4.95681	4.58863
Gpx4	8.38291	5.36517	7.62021	6.70429	5.0393	5.44732	5.13909	5.08087	5.02576	4.92865	4.96564	5.10972	4.96672	4.76998	5.16088	4.96705
Guk1	8.69545	7.04166	8.32257	8.39461	5.54795	6.23238	5.89377	5.86918	5.71279	5.55429	5.75769	5.55843	5.96313	5.91415	6.31204	6.09159
Fcer1g	4.87052	3.17217	5.62502	4.08148	1.24029	1.7824	1.79124	1.62592	0.756456	1.10669	1.34676	1.15487	3.15924	3.49228	3.41411	3.34484
Trim8	9.35673	8.67807	8.39644	7.98059	5.41803	5.87424	5.58917	5.74102	5.84837	5.7586	6.68584	6.96735	6.48976	6.41255	6.96494	7.11806
Tmem208	8.14194	5.49023	8.11351	7.51339	5.32321	5.53467	5.02137	5.11082	5.11185	4.88636	5.35224	5.11347	5.3548	5.39638	5.50115	5.48538
Hdac4	7.60776	5.32512	8.3635	8.04059	5.13752	4.86179	4.6906	4.93228	5.27	5.27853	5.52243	5.34827	5.56828	5.55897	5.91048	5.66242
Rbm17	8.37441	7.24356	8.85821	8.70298	6.09892	6.14126	6.13496	6.24268	6.09066	5.76348	5.77704	5.95563	6.02757	6.06613	6.1272	6.35053
Mkrn3	2.86842	1.63764	2.24078	3.84094	0.894376	-0.00232876	0.682708	1.38581	0.823308	0.923631	-0.0324478	-0.0484876	0.433144	0.942594	0.242574	0.11464
Il17re	3.92049	1.63764	3.34136	2.86561	-1.15654	-1.552	-2.01667	-2.01667	-1.44492	-1.64182	2.77037	1.94345	0.780608	0.529523	1.49623	1.74913
Ngrn	7.71661	6.41907	7.6233	7.85459	5.28271	5.49617	5.24277	5.2608	5.20254	5.02926	5.14657	5.03646	4.97728	5.24986	4.95681	4.9688
Zc3h3	2.61512	2.44763	2.8091	2.41645	0.327029	0.246349	0.510031	-1.04771	0.273337	0.0754309	-0.378929	0.0798758	0.741484	1.11186	0.617384	0.304076
Lias	7.59026	5.62067	8.52481	7.55194	5.15394	5.39677	5.25479	5.1498	5.24431	4.94763	5.06794	4.88215	5.48634	5.4605	5.64751	5.68496
Apol9b	3.43701	4.01957	2.5631	3.1618	2.37376	1.26723	1.16279	0.255258	1.36215	0.837459	1.46056	1.83847	0.0404743	0.268059	0.502936	1.12707
Oard1	7.6393	6.15833	7.53468	8.40079	5.25634	5.59478	5.77237	5.83371	5.41657	5.20157	5.37782	5.00042	4.95821	4.94827	4.82407	4.97404
Wdr45	6.80683	5.18757	6.6844	6.8932	4.37123	4.2922	4.2297	4.11126	4.28663	4.08757	4.00071	3.70309	4.25481	4.24106	4.35117	4.29685
Eif2b4	8.41805	6.26802	8.02172	7.71503	5.35905	5.67916	5.43013	5.30464	5.64626	5.05495	5.17602	5.40145	5.61232	5.49917	5.59143	5.6461
Nr1h3	7.16307	3.91553	6.38801	6.53991	4.08477	4.12368	3.77044	3.94391	4.35883	3.85881	4.47028	4.33786	3.7183	3.93742	4.10531	3.75514
Tardbp	9.71937	8.00516	10.0162	9.99595	7.56236	7.49625	7.11697	7.09059	7.23609	7.15549	7.40818	7.31992	7.40295	7.43858	7.03482	7.1512
Prr13	9.98233	7.87891	9.64497	9.5916	7.71402	7.76893	7.55124	7.63659	7.99864	7.5381	6.40051	6.2378	5.80372	5.84976	6.23645	6.32342
Ikbke	3.95736	-0.0869132	3.60454	1.58084	0.0744609	0.807063	0.0867046	-0.0634934	0.174378	-0.0286264	1.46056	0.591502	1.42386	1.52559	0.853663	-0.360566
Kif13a	8.01434	7.95305	9.06495	9.78853	7.06083	7.19159	6.92986	6.98676	7.1742	7.28559	5.71819	5.73941	5.75789	5.79486	5.75456	5.79268
Sdf2	8.60539	6.75212	8.73971	8.58027	6.24402	6.21607	5.91015	5.89809	6.22035	5.88032	6.53487	6.25999	5.69272	5.33784	5.86197	5.98662
Morf4l1	6.92788	5.38628	7.47836	6.93807	4.85575	4.80477	4.9702	4.94341	4.84854	4.77872	4.51707	4.2722	3.82039	3.98179	3.96104	4.07747
Gfod1	7.46783	5.5041	9.25953	8.71071	6.70461	6.32823	5.93812	5.94871	5.9833	6.91722	5.44504	5.66205	5.45947	5.22238	5.69498	5.18756
Tmem268	5.95835	3.19969	6.22153	5.41656	2.90683	2.8283	2.9479	2.67782	2.77763	2.783	3.12128	3.09171	4.0134	3.63803	3.51106	3.75108
Ston2	4.88972	4.88259	5.86985	5.87726	1.24029	1.52433	2.36065	2.50819	1.86882	2.09756	1.92445	3.3298	4.23381	4.39665	4.30922	3.1175
Sdc4	8.92917	6.05288	9.10779	8.46985	3.74876	3.97653	4.39713	4.09137	3.95517	4.23249	6.89514	6.24808	7.07488	7.10919	7.81751	6.42065
Irf5	5.22822	2.69973	4.75245	4.40781	1.70886	1.42692	1.07251	1.09759	0.273337	0.389902	2.81385	3.47695	2.57197	2.26098	2.72333	2.9361
Klhl5	8.28659	9.717	9.45078	10.0739	7.42112	7.60254	7.34095	7.37392	7.33927	7.54746	7.38315	7.73196	6.5582	6.518	6.31558	6.3778
Crip1	10.786	8.59631	10.9658	10.8202	9.11861	9.12402	8.8677	8.87624	8.87617	8.65532	6.69022	6.91022	6.84446	6.98116	6.84624	6.59061
Rps4l	8.55816	7.00216	8.13925	8.89325	6.10948	6.42758	6.22937	6.21997	5.96584	6.11361	5.51915	5.66717	5.67336	5.39638	5.80373	6.33975
Urb1	6.40124	3.24001	5.51999	5.14345	3.65957	3.31028	2.93087	3.2076	2.47904	2.88676	3.68668	3.1659	3.26649	3.2233	3.07003	2.24149
Abtb1	7.16701	5.62321	7.71495	7.66919	5.19021	4.96516	4.79309	4.89834	5.24887	4.63499	4.27411	4.43708	5.42439	5.33784	4.94772	4.51625
Efnb1	7.97217	8.85859	8.99043	8.56811	7.04441	7.14258	6.79522	6.68888	7.16376	7.42846	5.46563	5.41672	4.14291	4.2592	4.25426	4.87482
NA	5.59872	4.64301	5.93108	6.76207	3.69366	3.76362	3.88095	3.56569	3.81848	3.46757	3.6631	3.40525	3.29379	2.8924	3.77217	3.94855
Pigyl	7.06512	4.58158	7.68563	7.08919	4.13526	4.3988	4.41561	4.36423	4.48807	4.16037	4.35727	4.59581	5.07494	4.92574	5.11778	5.27365
Cd74	6.47938	8.64811	7.56655	6.99717	6.27625	5.93308	5.01128	5.02954	4.72067	4.64136	6.00047	5.43484	4.86345	4.87958	5.31441	5.0636
Cops9	8.65814	6.22347	8.14357	8.33229	5.507	5.69232	5.71011	5.73462	5.31134	5.21302	5.59276	5.56393	6.08242	6.14629	6.35323	5.99867
Ramp2	10.4859	12.7362	10.5365	10.8196	9.18977	9.2938	9.30749	9.27758	9.7447	9.35434	9.05115	9.47768	8.40679	8.4094	9.03707	9.26088
Nr6a1	3.63207	2.55807	5.20662	3.63413	0.206265	0.807063	0.598952	1.09759	0.686355	0.745811	1.51426	1.64451	3.00259	3.02554	2.38929	1.87397
C1ra	5.24323	6.01271	5.23603	5.11216	3.23474	2.88442	3.37041	3.38144	3.7034	3.41399	3.01352	3.04529	2.9943	2.69332	3.05657	3.27297
Skap1	2.05896	0.784707	2.68187	1.94788	-2.01667	-2.01667	-1.38484	-2.01667	-2.01667	-1.48555	-1.50838	-0.720139	0.818699	1.11186	0.37862	1.17639
Daam1	7.45176	6.74397	8.37309	8.66934	5.82672	5.59197	5.60803	5.5208	5.50195	5.71295	5.08579	5.59917	6.0834	6.19893	5.80876	5.55463
Aatk	8.15589	6.71684	9.41854	9.02459	3.30993	3.25459	3.45025	3.64968	3.29598	3.34799	5.52896	6.27348	7.75478	7.69162	7.64947	7.39206
Plaa	8.47638	5.65089	9.01986	8.44271	6.30411	6.19773	6.26123	6.25614	6.35353	6.26433	5.46222	5.78486	5.70167	5.68509	5.74619	5.90393
Rgl2	9.22874	7.10943	9.74271	9.02938	7.59429	7.54276	7.11084	7.10802	7.56938	7.2883	5.46563	6.02505	5.92108	5.89687	5.28873	4.82735
Prrc2a	10.0166	8.57512	10.4527	10.5685	8.07251	8.07	7.72951	7.67217	8.06035	7.97728	7.219	7.54164	7.74369	7.81171	7.6684	7.7044
Trp53i13	5.56328	5.01242	7.46047	7.02983	4.43308	4.51594	4.48724	4.55056	4.63952	4.58518	4.15237	4.17494	3.8015	3.84436	4.04183	4.07422
Psmb3	7.81029	6.30016	7.19687	6.95118	4.75171	4.52185	4.91065	4.75401	4.80372	4.26035	4.9315	4.80994	4.83817	4.87958	5.25229	5.4394
Mdp1	8.25917	6.4609	8.74824	8.5174	6.02497	6.29238	6.1247	6.24268	5.95749	5.82355	5.79343	5.79424	5.73566	5.58797	5.80876	5.76674
Sf3a3	8.65253	6.85306	8.37273	8.34147	6.43752	6.18475	6.08965	6.31735	6.22808	5.89106	5.70671	5.46454	5.46699	5.16581	5.56196	5.81426
Psmb1	10.0242	8.33682	10.2982	10.1573	7.46372	7.51192	7.51242	7.53902	7.50498	7.10912	7.48079	7.30522	7.65337	7.5824	7.97764	8.15534
Rab7b	5.76393	1.82601	5.61261	5.13161	0.43846	0.356267	0.260319	0.255258	-0.17119	0.124774	4.89147	4.03149	2.49172	2.63894	3.03613	3.89799
Wdr31	0.859986	0.548279	4.51179	3.62148	-0.864286	-1.552	-0.826232	0.255258	-1.29557	-0.887851	0.858194	1.26699	2.22012	1.40041	2.13126	2.14568
Cd24a	4.61762	7.77412	5.08974	4.08148	3.2952	3.62774	3.81752	3.41383	3.452	3.65137	4.33506	4.94671	3.93321	3.79548	3.98255	4.11274
Rnf144a	8.37952	8.76527	8.76907	9.35658	7.20471	7.2927	7.32922	7.29352	7.46595	7.87194	3.98177	4.03149	4.47949	4.29481	4.44715	4.28846
Rsrp1	10.3387	8.26414	10.2117	10.8732	6.5886	7.63016	6.68846	6.75674	7.51828	8.27389	7.07454	7.48045	9.04542	9.05759	8.22709	7.66957
Trabd	8.30638	6.84764	8.2611	7.92144	6.01376	6.18288	5.97804	6.01882	6.0371	5.92279	5.03157	5.35145	5.29695	5.26789	5.09492	4.84843
Tmcc1	7.04813	5.9144	8.58415	8.21236	5.06557	5.06971	5.11291	5.17836	5.267	5.30419	4.89654	5.26969	6.01122	5.92555	6.2971	5.62294
Abca7	7.72733	4.71153	6.82439	6.6326	4.9668	4.75546	4.79779	4.7413	4.81403	4.6477	3.56473	3.88103	4.67904	5.00312	4.22146	3.26729
Apobec3	7.39913	6.09928	7.33694	6.57147	5.67569	5.35765	5.22542	5.17836	5.33444	5.18131	3.75519	4.07835	3.2802	3.18585	2.76531	3.01278
Lrp4	6.85648	5.55293	7.50209	7.74885	2.37376	2.57905	3.1305	2.7302	3.01062	3.2679	4.85552	4.64333	5.97794	6.06613	6.06469	5.64829
Meis1	5.42533	7.02925	4.66864	6.00848	3.35324	3.75361	3.9544	4.16932	3.88258	3.86971	2.11029	2.60779	4.09327	4.10726	4.19098	3.99396
Junb	7.78999	5.8089	7.32483	7.85751	5.40093	5.10557	5.51255	5.40473	5.53224	5.06288	4.15237	4.77243	4.45551	4.46076	4.8101	5.75563
Taldo1	9.85439	8.05686	9.13819	9.19887	7.06518	6.88731	6.86411	6.93749	7.06794	6.50346	7.12288	6.9538	6.91868	6.73768	6.81809	7.07034
Fkbp11	4.42046	2.30287	3.67306	4.3035	1.04283	0.553777	1.24774	1.09759	0.535026	1.00495	2.07499	1.03329	1.86718	1.74742	2.31208	2.83988
Mettl17	6.59503	4.58158	5.81459	5.95993	2.76438	3.44077	3.06957	3.2076	3.25419	2.99023	3.55194	3.66267	4.17263	4.42906	4.28921	3.56453
Snrpb2	8.32941	7.12835	8.13492	8.7851	5.75048	5.92641	6.05765	6.03973	5.95003	5.87131	5.90569	5.65434	5.76888	5.77609	6.03497	6.36456
Isy1	6.29722	4.87408	7.38077	7.11008	4.33569	4.35313	4.49015	4.5794	4.21063	4.40468	4.53666	4.18211	4.506	4.39665	4.29209	4.60223
Cct8	10.6091	8.68265	10.6271	9.98252	7.7803	7.64106	7.46589	7.56629	7.55255	7.17062	7.81425	7.87374	8.0936	8.11787	8.29888	8.63339
Rassf1	8.80571	7.5777	9.2395	9.08031	7.28518	7.25061	7.15184	7.05766	6.94995	6.981	5.68052	6.21001	5.16825	4.95941	5.41013	5.4731
Irak4	5.80496	4.42716	7.37637	6.34541	4.93389	4.50405	4.36262	4.53592	4.81197	4.55625	4.03786	3.64202	2.5151	2.4623	2.76531	3.11118
Nrde2	7.29855	5.14574	6.4687	6.77068	4.45313	4.59094	4.68044	4.60768	4.77867	4.58077	3.96258	3.93295	4.08938	4.16613	4.03841	4.01106
Dnajc7	9.73737	8.5456	10.0262	10.3437	7.31377	7.16823	7.16327	7.16859	7.19091	6.9124	7.27257	7.27033	7.84953	7.76487	8.04181	8.49914
Med30	6.88546	5.51783	6.39382	7.73522	4.51799	4.69398	5.03338	5.13044	4.30136	4.49892	4.40781	4.16774	4.26863	4.58101	4.57067	4.63568
Tmem212	2.41759	2.42449	2.13371	2.77719	-2.01667	-2.01667	-2.01667	-2.01667	-2.01667	-2.01667	0.113882	-0.520735	1.86718	1.26334	1.45578	1.24735
Slc39a6	6.52921	7.51814	6.95789	7.49098	4.90022	4.32636	4.47261	4.4604	4.55844	4.33301	4.82397	4.70933	5.36288	5.51436	5.27426	5.5812
Smarca2	9.22591	10.1871	9.87909	10.4816	7.08137	7.02267	7.06427	7.10554	7.27355	7.1845	8.20153	8.4029	8.04296	8.14739	8.29638	8.10925
Spa17	4.39381	2.32802	5.67837	5.04116	0.813998	1.42692	2.28226	2.56697	1.85291	1.26912	1.92445	1.60238	3.23866	3.2233	3.28153	3.67161
Siva1	6.59503	4.07263	5.97245	6.23493	3.79136	3.80298	4.01625	4.15023	3.48851	3.52383	3.58996	3.01349	3.66702	3.86819	3.84837	3.63238
Hbs1l	8.11975	5.93092	8.32143	8.22878	5.97501	5.93751	5.79019	5.89809	6.06067	5.75762	5.09463	5.24936	5.49078	5.58077	5.42199	5.21142
Pdcd5	5.86441	2.86354	6.22316	5.75526	1.51909	2.09934	3.9289	4.11126	3.16679	3.24018	1.51426	2.00941	3.49538	3.95978	3.97184	3.93428
Ifrd1	8.0659	7.69353	8.55592	8.91208	6.83507	6.51313	6.31553	6.28707	6.45913	6.21819	5.96234	5.59649	5.61232	5.4605	5.99318	5.6732
Ten1	6.3044	5.22153	6.33764	6.21824	3.91211	3.60566	3.20321	3.41383	3.37052	3.17139	3.68668	3.63158	4.33912	4.2592	4.37577	4.2772
Wrap53	6.61248	4.69228	6.76509	6.71673	4.11024	3.88779	3.77998	3.77964	4.24151	3.95744	3.99127	3.82717	4.30933	4.63757	4.35942	4.58635
Stx3	7.76161	7.36324	8.24069	8.43746	6.08614	6.06844	5.94873	5.91516	6.28995	6.27939	5.08135	5.37354	5.51997	5.65115	5.24933	5.00338
Tbx4	3.2114	3.29208	2.97336	2.63347	-2.01667	-1.552	-1.774	-2.01667	-2.01667	-2.01667	2.24345	2.89634	0.995387	1.52559	0.580235	0.820778
Tap1	8.49844	7.28831	8.27455	8.74329	7.50831	6.64893	6.56836	6.42456	6.71984	6.72062	4.85552	4.2722	4.48838	4.29481	3.81278	4.38078
Pkig	8.64407	6.6819	9.15133	8.29396	6.29858	6.11218	6.53071	6.58605	6.28922	5.76931	6.08053	6.54077	6.00297	5.84377	6.06048	5.93918
Itga4	5.13474	2.22465	3.60454	3.90842	-0.621382	-0.683257	-0.714852	-0.0634934	-0.718615	-0.704298	1.34676	2.62893	3.41063	3.2233	2.71478	1.91813
Slc39a4	1.91643	2.66065	1.98764	0.985776	0.813998	-1.552	0.942625	-0.473252	0.452959	0.613788	-1.13327	-0.520735	-0.324363	0.529523	-0.838771	-1.32535
Retreg2	9.02889	6.69284	9.92271	9.49492	6.84395	7.02475	6.68972	6.65541	6.79671	6.91854	6.94243	6.89612	7.02331	7.0583	7.19123	7.16692
NA	1.91643	-0.553992	2.73777	2.79981	-2.01667	-2.01667	0.761868	-0.0634934	0.273337	-0.466487	-1.13327	-1.22741	0.277738	0.529523	0.884467	0.390216
NA	6.49827	4.30577	6.59263	6.61038	3.44949	3.3639	3.68669	3.77964	3.30771	2.91508	3.30008	3.38054	4.70723	4.46076	4.79194	5.02878
Pfdn5	9.09759	6.21843	8.43782	8.41947	5.76659	5.99387	5.95506	5.6351	5.71389	5.47207	5.80155	5.80821	6.62489	6.51423	6.71046	6.70006
Megf8	8.41805	6.08459	9.83425	9.25997	6.65356	6.41969	6.52221	6.58249	6.77524	6.45666	6.4094	6.46492	6.99811	7.0583	6.80356	6.8899
Ccl7	3.99332	-0.226452	2.29147	0.289341	0.206265	0.246349	-0.182995	-0.0634934	-0.307596	-0.083612	1.40478	1.60238	-0.597779	0.268059	0.144182	0.0631221
Hypk	2.51973	0.923221	4.64446	3.10239	0.541898	0.882489	0.722831	1.24888	0.721832	1.05672	0.113882	0.0798758	2.26219	2.02693	1.51604	0.347789
Bin2	3.67697	1.51155	3.18925	1.87873	-0.0706064	-1.2011	-0.946936	0.255258	-1.79992	-0.541485	-0.0324478	1.31995	1.23958	1.40041	1.02933	2.04305
Chia1	1.5806	2.68032	2.04785	2.54698	-2.01667	-1.552	-2.01667	-2.01667	-2.01667	-2.01667	-0.589372	0.197745	1.29468	2.10924	1.18591	-0.432692
Foxs1	2.86842	-1.24903	3.59449	3.60873	0.206265	-0.480629	0.313839	-1.04771	-0.237782	-0.2003	-0.835841	0.306708	1.84889	2.79629	0.973118	0.212465
2200002D01Rik	5.24323	2.42449	5.87817	5.64298	3.21922	3.44077	3.70183	3.44551	2.86749	3.24018	2.45047	2.64976	2.46794	2.26098	2.86134	2.95742
Nhlrc1	4.92738	5.36821	5.32389	6.14945	2.55778	2.35905	2.38586	2.4469	1.80409	2.06001	3.26918	3.02948	3.86203	4.24106	4.19406	4.23708
B4galt3	6.84668	4.91201	6.61021	6.92055	4.67982	4.04379	4.58026	4.16932	4.57308	5.2116	4.17755	3.83629	3.96752	4.16613	3.84054	3.24435
Acp5	3.01553	1.22055	2.5631	1.03745	-0.864286	-1.552	-0.182995	-2.01667	-0.718615	-0.541485	0.772638	1.26699	0.741484	-0.462639	0.757097	-0.103485
Cmklr1	6.29001	4.89948	6.4783	6.10851	3.8122	4.3794	4.69816	4.49108	3.71665	4.41463	3.7663	3.58907	2.89973	2.39826	2.60809	3.35559
Ptges3	9.30581	7.27544	8.96552	8.77348	6.36532	6.49071	6.48915	6.44036	6.3436	5.98924	6.61079	6.65209	6.5909	6.55151	6.56592	7.08575
Jaml	3.01553	1.63764	2.45606	1.74525	-1.15654	-2.01667	-2.01667	-1.04771	-2.01667	-2.01667	2.07499	1.21202	0.163978	-0.0515152	0.242574	0.995841
Rgs12	8.94072	8.51649	9.12514	9.41743	7.32106	6.88387	6.63952	6.69549	7.02687	6.90138	6.69604	7.39588	6.5909	6.60922	6.34356	6.29369
Scel	1.5806	3.21326	2.01806	2.73085	-1.52343	-1.2011	-1.38484	-2.01667	-1.61153	-1.09821	1.2863	0.675177	1.1823	1.11186	1.30455	1.59442
Nfkbil1	6.52307	5.58198	7.2491	7.47877	4.53062	4.77043	5.03538	4.87527	5.24278	4.60488	3.96258	3.74242	4.43727	4.32956	4.77354	4.98446
Btla	2.70458	1.46694	1.71797	1.98783	-0.0706064	-0.14484	0.0867046	0.737046	0.224706	0.837459	-2.01667	-2.01667	0.103547	-0.0515152	0.37862	-1.32535
Gcc1	6.97359	6.00103	8.15773	8.29164	5.87951	5.76637	5.6722	5.45228	6.11088	6.03674	5.08579	4.97999	4.61283	4.34663	4.54439	5.15871
Emid1	4.70694	3.07149	4.30528	3.8373	1.99064	1.65913	1.80998	1.38581	1.42807	1.54765	0.681688	0.829239	2.81747	2.79629	2.06558	1.98886
Tsc22d3	10.0681	11.1008	11.5358	11.4932	9.3323	8.18573	8.42211	8.45684	9.46231	8.79987	9.84272	8.98482	8.31066	8.28212	9.09902	9.06814
Ogfr	9.26504	7.57835	9.12274	9.0538	7.3894	7.38879	7.21606	7.31297	7.30496	7.07931	5.64184	5.81053	5.5987	5.66482	5.57146	5.40619
Prr3	6.33274	4.31209	6.37043	6.2439	3.0006	3.08932	2.82426	3.13174	3.01062	2.97012	3.61475	3.818	4.66342	4.47635	4.60344	4.40942
2410004P03Rik	3.2712	2.57918	3.44576	1.71383	-2.01667	-2.01667	-1.774	-2.01667	-2.01667	-1.34456	-0.589372	0.306708	2.03836	2.74573	1.75148	1.15194
Ifnlr1	3.2114	2.02374	3.4569	3.63413	1.70886	1.52433	1.32797	1.38581	2.39363	2.02144	-2.01667	-0.720139	-0.597779	0.268059	-0.0753554	-0.360566
Tmem44	8.36244	6.76369	8.76572	8.58068	6.11368	6.23957	6.08195	6.0907	6.16986	6.17492	5.83095	5.87609	6.24423	6.28555	6.06805	5.80743
Yipf2	7.57551	4.95705	7.55427	7.14583	4.70789	4.23579	4.6233	4.50618	4.5312	4.45619	5.32245	5.26969	5.11758	4.97046	5.19507	5.3265
Eif2ak2	6.60087	5.13864	8.17976	8.30158	5.65277	5.46584	5.81244	5.5575	5.69393	6.07255	4.99426	4.89092	4.5234	4.66505	4.35393	5.14483
Hs3st1	7.03525	7.85206	7.19936	7.80816	4.56786	4.85712	4.53027	4.53592	4.67389	4.60052	6.08275	6.43672	4.97728	5.1754	5.51843	5.99609
Nup50	7.55159	5.78866	8.46912	7.80117	5.73965	5.93308	5.581	5.65556	5.82817	5.76153	5.29202	5.22527	5.02694	4.79507	5.17653	5.29335
Dmkn	1.37794	1.75359	2.60378	1.20499	-2.01667	-1.2011	-2.01667	-1.04771	-1.79992	-1.64182	0.113882	-0.0484876	0.995387	-0.462639	0.853663	0.510488
Slc25a37	6.21587	4.43297	6.07368	5.36693	3.46274	3.99364	3.72177	3.44551	3.12103	3.55566	2.89706	3.56733	3.80624	3.46127	3.48115	2.76931
Myo9b	8.44913	5.86369	7.97256	7.719	6.20121	6.0805	5.54928	5.60035	5.84837	5.81418	5.01769	5.18302	5.50252	5.75067	5.05147	4.30795
Bmpr2	9.742	10.7261	10.907	11.7588	8.81154	8.76718	8.79678	8.79403	9.17365	9.24962	8.63026	8.94771	8.49416	8.5615	8.12539	8.43076
Mapk3	10.8475	9.48785	10.8912	10.885	8.701	8.78264	8.82801	8.85058	8.86307	8.70509	8.21679	8.29916	7.65994	7.69162	7.90954	8.00112
NA	5.82505	4.73992	5.7706	6.75726	3.92174	4.05198	3.84504	3.82851	3.42535	2.99023	4.0194	3.94985	3.55865	3.33012	3.66092	4.05457
Chka	7.53949	5.13509	8.04545	7.07921	3.18767	2.70905	2.66862	2.50819	2.95207	3.04252	5.76047	5.84707	6.33902	6.16084	6.15904	4.88968
Il17rc	6.54746	3.83006	7.09263	5.93716	4.20783	4.09225	4.05213	4.29637	4.25368	4.52901	4.21857	4.39451	3.67223	3.49228	3.46595	3.7014
Cep164	5.48967	4.85257	6.40969	6.01252	3.57674	3.2827	3.18178	3.59424	3.55885	3.37883	3.84176	3.64202	3.84828	4.12715	3.69608	3.23855
Cfap206	2.61512	1.16578	2.18824	1.06261	-2.01667	-2.01667	-2.01667	-2.01667	-2.01667	-2.01667	-1.13327	-0.720139	1.26739	0.529523	1.05664	1.02306
Sgsh	5.92151	4.80856	7.12531	6.78162	4.39214	4.3988	4.73296	4.86359	4.42758	4.64348	4.03786	3.61048	3.64599	3.52263	3.7304	3.75108
Rcc2	9.05038	7.51814	9.17092	8.91855	7.04771	6.7976	6.63032	6.62115	6.53276	6.58506	6.36989	6.39876	6.40075	6.53299	6.77816	6.49543
Mepce	8.15192	6.90832	8.21302	8.46559	5.85962	5.98747	6.10301	6.02931	6.29512	6.19816	5.41005	5.66461	5.66031	5.36322	5.69498	5.76574
Col4a4	6.16161	3.65224	5.23603	4.89299	3.47586	3.88779	4.15835	4.00896	4.09025	4.17215	-1.13327	-0.345575	1.39893	-0.462639	0.194216	0.11464
Tekt1	2.05896	1.55481	3.84413	2.82943	-2.01667	-2.01667	-2.01667	-2.01667	-1.79992	-2.01667	-0.195312	-0.720139	2.10152	1.74742	1.89454	2.35295
NA	3.53784	1.10886	2.43367	2.63347	0.638414	0.727475	0.555176	-0.0634934	0.574372	0.506184	-0.589372	0.0798758	0.995387	-0.0515152	1.05664	1.15194
Myrip	6.15369	8.29716	7.87725	7.81188	4.23895	4.91665	4.85081	4.97632	5.3186	5.51666	5.5644	6.56702	5.49078	5.44473	5.91328	6.26048
Polr2l	5.7743	4.20753	5.72292	5.31291	2.90683	3.377	3.18178	3.2076	3.06688	2.87959	3.2376	3.1659	3.01084	3.18585	3.62489	3.26729
Tspan18	7.28773	8.42362	6.79943	7.5572	6.2421	6.51905	6.18608	6.20153	6.15615	6.54823	2.8767	3.48857	3.03531	3.36405	2.68884	3.48357
9430038I01Rik	4.77047	2.4704	5.61261	4.9929	2.80654	2.70905	2.98961	3.05167	2.62672	2.95655	2.36536	2.10303	2.91739	2.58243	2.27769	1.85894
Lpar3	3.01553	2.97922	3.77455	3.23002	-2.01667	-2.01667	-1.38484	-0.473252	-1.79992	-1.8171	3.25347	1.94345	1.15278	-0.0515152	1.16097	2.57149
Sh3bp5l	8.24805	6.88414	8.41299	8.43806	6.37586	6.38282	5.99554	6.01882	6.41172	6.00167	5.59898	5.73698	5.53148	5.45264	5.62716	5.77477
Mcam	9.55919	9.75533	9.72582	10.0088	8.59675	8.58796	8.46987	8.51399	8.39456	8.23071	2.72554	3.91585	6.01942	6.02432	5.10966	4.44508
Ncoa6	7.52421	6.67946	8.37933	8.63934	5.69265	5.87424	5.69507	5.71526	6.06413	5.86407	5.51586	5.7	5.97478	6.11675	5.71333	5.83649
H2-Ob	3.48831	2.57918	1.38604	2.22915	1.61709	1.02245	0.942625	0.516171	1.64687	1.00495	-0.378929	0.197745	-0.324363	-0.462639	-1.3107	-0.103485
Srgap1	5.97643	6.18095	6.53331	7.25661	4.23123	4.3331	4.18013	4.29637	4.02073	4.44166	3.67494	4.04728	5.10029	4.63757	4.82208	4.5447
Trim41	7.88396	6.66472	8.2718	8.29463	5.99793	6.02541	5.73117	5.66904	5.96953	5.67307	5.63276	5.67989	5.65637	5.57354	5.57382	5.65156
Dnah2	4.19203	3.31742	3.22881	3.09631	1.04283	1.65913	1.37908	0.516171	1.14413	1.10669	1.96358	1.68544	1.93811	1.26334	1.86395	0.471501
Psmd9	7.80524	6.78656	7.90295	7.82181	5.51655	5.49917	5.41643	5.39665	5.51465	5.26484	5.73808	5.36726	5.27485	5.52938	5.65423	5.52994
Bcdin3d	4.83133	3.31742	5.64952	5.45981	2.53288	2.22057	2.96473	2.87682	2.50981	2.44706	2.8767	2.42649	3.18134	3.52263	2.95138	3.39779
Twnk	6.25342	3.7108	6.5425	6.38147	4.11863	4.3794	4.25044	4.20678	3.61182	3.94031	3.52603	3.42955	3.72834	3.79548	3.78855	3.61012
Nlrp3	2.30766	0.265362	1.56153	-0.0449609	-2.01667	-0.00232876	-1.38484	-2.01667	-1.61153	-1.64182	-1.13327	-0.520735	-0.81388	0.942594	-0.334402	-0.76377
Tnrc6c	8.21798	7.01963	8.79922	9.07935	6.09041	6.23777	6.06254	6.21997	6.51391	6.36016	5.38143	5.83802	6.79635	6.82552	6.44327	6.38109
Kdm7a	6.97359	5.00464	8.49335	8.40094	5.55106	5.34771	5.52111	5.68903	5.62182	6.12047	5.61751	5.64659	5.37091	5.37989	5.60537	5.40877
Ccdc25	6.78649	6.30016	8.55267	8.62133	5.39403	5.59197	5.37139	5.49075	5.59815	5.50739	5.7409	5.65434	5.74682	5.82562	6.20705	6.45541
Tmem120a	6.57144	3.7944	6.57483	5.70721	3.95022	3.84129	3.86759	4.16932	3.76846	3.44346	4.10064	3.46525	3.85746	3.79548	3.9392	3.8264
Fam98c	7.22863	5.35603	7.10862	6.71574	4.41276	4.55681	4.47554	4.44481	4.48807	3.96762	4.61863	4.29883	5.1252	4.97046	4.84576	4.70664
Pak4	5.72169	7.69353	6.32857	6.47638	4.00555	3.83181	3.92461	3.47651	3.49365	3.57798	5.41005	5.95144	4.47949	4.27711	4.65348	5.36024
Elk4	8.43613	8.25802	9.04523	10.0435	7.16374	7.35857	7.72582	7.72476	7.53645	7.41426	5.96234	6.33587	6.33574	6.45644	5.73673	6.01486
Eif2s3x	3.92049	2.91426	5.21977	4.13287	1.79514	2.30524	2.38586	2.82958	2.14192	2.3257	1.80024	2.32652	2.02213	1.84673	1.70046	1.31498
Plbd1	3.95736	1.32421	3.18925	2.84401	1.79514	2.03468	1.9348	2.09404	1.2693	1.00495	-1.13327	-0.951592	0.0404743	-1.0398	-0.0172606	-0.226307
Ebpl	6.3878	3.42627	7.07465	6.84008	3.61282	3.62774	3.9836	3.92156	3.802	3.36862	4.21046	4.15322	4.68421	4.87958	4.91826	4.9653
Fam189a2	8.9338	6.17749	8.42226	8.121	6.71156	7.08786	6.73947	6.81247	6.99324	6.92203	3.72134	3.75209	4.18361	3.86819	4.37577	3.98014
Prkrip1	6.74491	5.45926	7.30877	7.25286	4.61013	4.63522	4.52176	4.44481	4.57551	4.48008	4.57508	4.52991	4.81951	4.79507	5.1339	5.10559
Maf	7.95176	4.80408	8.89274	8.13312	3.78083	3.48984	4.7231	4.55056	3.94019	4.66865	7.39303	6.73972	5.91449	5.82562	6.24315	6.87877
Ciart	6.42776	5.13864	6.26181	5.44674	1.9536	3.19666	2.70914	2.87682	3.452	2.19319	4.63084	4.51863	4.3651	4.10726	4.55161	3.69295
Fam183b	3.01553	1.16578	3.91858	2.67485	-2.01667	-2.01667	-1.56634	-2.01667	-1.61153	-2.01667	0.368363	-0.189397	1.88524	1.64076	2.23051	2.8011
Dapk2	7.03525	4.51193	5.6592	6.31694	5.03487	5.0079	4.99294	4.85182	5.10683	4.30117	1.51426	1.09536	1.54242	0.529523	1.32715	1.88884
Tmem41a	6.08037	5.55026	6.20509	5.60816	3.78083	3.95922	4.03231	3.56569	3.36492	3.46757	3.28471	3.44155	3.81569	3.7704	4.19098	4.00765
Mpeg1	5.84487	4.36774	5.35997	3.33183	2.16278	1.82125	1.9348	2.62346	1.17005	1.2909	2.0388	2.82485	3.86658	3.52263	3.57383	4.07097
Ccdc61	6.64109	4.77693	6.25224	6.49614	4.47289	4.39236	4.39091	4.36423	4.62084	4.47771	3.44539	3.47695	3.75314	3.42959	3.55959	3.54589
Tmem176a	7.55159	8.50343	6.95985	7.10932	5.41462	5.41276	5.54229	5.49832	5.72267	5.18276	6.27585	6.08173	4.81951	4.80745	5.50115	5.55347
Cdc25a	6.29722	4.67768	6.27289	6.53542	4.35001	4.3794	4.01221	4.13087	3.95517	3.94031	4.03786	3.83629	3.49538	3.66549	3.74306	3.78725
Tnpo2	8.53548	7.17676	9.05191	9.23026	6.10315	6.10629	6.05765	6.14959	6.07274	6.19527	6.44785	6.58741	7.00742	6.84367	7.17808	7.11529
Ttc7	7.05239	4.58158	6.13915	6.10094	4.12697	4.61877	4.15469	4.0712	4.5312	4.03692	4.21857	3.99939	3.63001	4.00348	3.63851	3.54589
Tspan14	8.75294	8.71966	8.73714	9.08895	7.28331	7.2927	7.05349	7.04995	7.3963	7.19501	6.4305	6.48244	5.53578	5.32067	5.57382	5.68176
Phactr1	9.04611	8.48503	10.9208	10.6392	5.78252	5.89716	5.96868	6.05007	5.56801	5.65849	7.74434	7.95551	9.05592	9.10725	9.14337	9.18506
Ssh2	8.01871	7.6642	9.75236	9.60551	7.32288	7.5565	7.46626	7.46367	7.84272	8.01825	5.06794	5.41672	5.66946	5.658	5.50982	4.99481
Samsn1	3.99332	2.30287	3.81843	3.45095	1.1117	1.20982	1.45251	1.24888	0.494576	0.951248	1.15722	1.55898	1.71392	2.4623	1.10974	1.04977
Rangap1	9.12722	7.52155	9.52416	8.92864	6.58709	6.53375	6.29156	6.17343	6.53338	6.27803	6.53487	6.76262	7.12846	7.17755	7.2497	7.66282
Llgl1	7.71122	5.775	8.34187	8.22234	5.51337	5.56074	5.51541	5.28726	5.70948	5.53958	5.50595	5.95981	5.99051	5.93122	5.83758	5.41649
Ntn1	8.54157	8.34801	9.26489	8.83124	6.75526	6.95549	7.21693	7.25157	7.20587	7.38924	6.57175	6.17631	5.55142	5.50678	5.43895	6.08756
Arhgap23	8.1638	8.06577	8.91741	9.3149	6.7753	7.05868	6.81391	6.68557	7.102	7.34308	5.70382	6.2718	6.15307	6.25875	6.16298	5.62405
Rassf7	3.99332	2.35275	2.31616	2.26211	-0.413542	0.807063	0.799877	0.516171	0.918113	0.807552	1.01544	1.26699	0.780608	0.750792	1.30455	1.48122
Fyb	2.18866	1.71596	2.18824	2.61658	0.206265	-0.302987	-0.110699	-1.04771	-0.922599	-0.620596	-0.195312	0.0798758	1.02827	0.942594	0.723417	0.212465
Mtfr1l	8.02957	6.3347	8.52481	8.47718	5.81901	5.89488	6.08388	6.19222	5.89282	5.83749	6.11353	6.01304	5.75421	5.7248	6.06553	5.8384
Tamm41	6.09699	3.87343	6.21825	5.3376	3.28032	3.57188	3.61921	3.64968	3.43607	3.01006	3.18889	2.98098	3.47167	4.24106	3.55001	3.65865
Tbc1d10a	7.53644	6.74514	7.79069	7.32806	6.00926	5.50813	5.2565	4.87527	5.61122	4.96128	5.57391	5.22874	5.0611	4.85593	5.25524	4.694
NA	3.08382	-2.01667	0.334945	3.20764	0.43846	0.356267	-2.01667	-2.01667	0.410107	0.306824	0.681688	0.968425	-2.01667	-2.01667	1.61119	0.6215
Fermt3	4.5224	2.75642	4.12834	3.50701	1.51909	0.246349	1.19166	1.24888	1.09086	0.951248	1.66433	2.16223	2.17678	3.06732	1.90959	1.76534
Ptprk	7.94948	7.20079	8.70857	8.51669	6.18732	6.40857	6.31553	6.48297	6.69663	6.53003	5.63882	5.49365	5.64846	5.60225	5.69281	5.68496
Nudt3	9.89475	7.95557	10.1371	10.0411	7.14538	7.42944	7.23439	7.20606	7.04098	6.9789	7.38945	7.63407	8.0659	8.05825	8.10203	8.26325
Mrpl17	8.63982	5.79994	8.68477	7.8485	6.09679	6.4618	6.57864	6.59314	5.82613	5.77897	5.6893	5.61515	5.55987	5.57354	5.75456	5.7986
Tnfaip8l2	3.14902	0.631468	1.28958	1.92062	-0.0706064	-1.2011	-0.51498	-1.04771	-0.458258	-1.09821	-0.589372	-0.0484876	0.741484	0.942594	0.542103	0.939814
Nr2f6	8.12381	6.17403	7.99949	7.87315	5.5634	5.93086	6.09539	6.06033	6.05547	5.76639	4.97045	5.04435	5.24893	5.19438	5.42068	5.39711
Epb41l2	8.79683	8.61942	9.00356	9.70499	7.48416	7.37743	7.16782	7.21986	7.51796	7.49916	6.72338	6.36451	6.52978	6.71815	6.1272	6.18718
NA	2.18866	0.157221	2.26635	1.54558	0.206265	0.127362	-0.182995	-1.04771	0.12223	-0.327263	0.113882	-0.951592	-0.500768	-2.01667	0.242574	-0.360566
Fpgs	5.64466	4.89948	5.9879	5.31422	3.58887	4.01893	3.77521	3.47651	3.71224	3.6216	3.4315	3.46525	2.81747	3.02554	2.89199	2.54357
Tnfrsf26	4.49759	0.98779	3.25459	2.78477	1.99064	1.08765	1.77224	2.4469	2.36025	2.67947	-0.378929	-0.720139	-1.06815	-0.462639	-1.05553	-0.76377
Plcb3	8.41142	7.80412	8.60058	8.79487	6.37586	6.38607	5.84689	5.65556	6.5618	6.22598	6.89261	6.72261	6.17984	6.00832	6.2638	6.64034
Hbb-bt	5.34413	1.59682	3.85259	4.73373	-0.413542	1.42692	3.38298	2.96689	1.51153	3.53756	1.2863	2.10303	2.27594	1.84673	1.75148	2.5151
Tep1	6.61824	3.74855	5.25212	5.06781	3.48886	3.48984	3.1305	3.80428	3.75568	3.62589	3.38901	3.23647	3.55301	3.61003	3.11618	2.59888
Nudt1	5.73236	3.4608	5.83396	5.12566	3.68239	3.78343	3.59779	3.59424	3.54407	3.22894	2.8767	2.62893	2.40674	3.02554	2.37851	2.61686
Egln2	8.56714	4.99681	9.16201	8.26343	6.57952	6.74426	6.39838	6.35537	6.53151	6.28007	6.19389	6.2785	5.88563	5.75067	5.67089	5.76574
Kit	7.59903	8.69751	6.58503	7.19145	6.28187	6.03577	6.01486	5.89235	5.58858	5.91053	6.0238	5.62571	4.76933	4.50703	4.80205	5.11194
Ss18	8.12584	6.76715	8.25712	8.36789	6.19726	6.28718	6.20833	6.26948	6.17867	6.47342	5.6893	5.83575	5.10029	5.03506	5.35896	5.3589
Ift52	6.41456	4.43297	7.12181	6.81392	4.45974	4.43056	4.50748	4.7413	4.31013	4.31452	4.75872	4.49003	4.24085	4.08709	3.96825	4.15948
Fam222b	6.52921	5.40118	7.56333	7.34898	4.74088	4.97812	4.85758	4.95447	4.8263	5.00146	4.58138	4.93402	4.77419	4.66505	4.61267	4.96354
Trp73	2.70458	1.10886	1.82509	1.13556	-2.01667	-1.552	-2.01667	-2.01667	-1.61153	-2.01667	-0.835841	0.408016	0.741484	1.52559	0.502936	0.258998
Rpl37	4.33898	1.37337	3.24176	2.90787	1.24029	0.954167	1.30172	0.516171	0.756456	0.389902	0.938958	0.754263	1.69356	1.52559	2.02468	1.79722
Clec1a	7.36866	8.237	9.55204	9.15605	8.03644	7.52006	7.50273	7.47523	7.59412	7.67716	3.85222	3.95822	2.81747	3.14741	2.16929	3.08559
Thap3	7.1472	5.07691	6.78513	6.74615	4.48592	4.52773	4.36579	4.34756	4.4168	4.08757	4.31251	4.26547	4.98568	4.99232	4.66684	4.54938
Aif1	4.09609	1.37337	4.34782	3.91534	0.0744609	0.643238	0.682708	0.516171	-0.107538	-0.140777	1.40478	1.09536	2.27594	3.02554	2.93676	2.58981
Pfdn2	9.29325	7.27705	9.18209	9.24622	6.22083	6.32654	6.29987	6.29579	6.12088	5.95469	6.61079	6.3833	7.32652	7.44057	7.68763	7.8134
Kdm6b	7.119	6.17055	7.31567	7.93895	4.84061	4.99095	5.64765	5.47548	5.78375	5.80475	4.25057	4.74849	5.03303	4.98143	4.90705	4.86168
Svbp	6.78649	5.38329	6.77959	6.77877	4.27693	4.68347	4.84854	4.81591	4.84049	4.73966	4.05608	4.29883	3.82975	4.22269	4.04524	4.29963
Mogs	7.22107	5.60274	6.63004	6.23216	5.18623	5.06162	4.69565	4.49108	4.61849	4.39214	3.73272	3.70309	4.21251	4.34663	4.22748	4.03799
Stub1	9.71937	7.61458	9.27201	9.27837	6.88265	6.87582	7.05251	7.07295	6.72039	6.47401	7.00708	6.78515	7.31948	7.2012	7.49055	7.56465
Slc36a2	3.63207	2.27726	3.77455	3.20764	1.79514	0.356267	1.71372	1.38581	1.4704	0.613788	1.56604	0.306708	1.73399	1.11186	1.02933	0.757362
Dbndd2	7.06089	5.40118	8.95794	8.40924	5.36259	5.67652	5.54649	5.36387	5.29082	5.49101	5.01769	5.4557	6.44556	6.52552	6.64113	6.61764
Jun	7.73265	10.5715	8.36831	8.62503	6.95119	7.36516	7.42467	7.36151	7.87975	7.97686	6.49369	6.84622	6.55961	6.53299	6.65348	7.16921
Prkce	8.98604	8.15018	10.4641	10.6188	6.37411	6.90098	6.97728	7.02396	6.6983	6.95863	6.75996	7.40126	8.66135	8.63194	8.54136	9.08701
Apaf1	6.60087	5.45926	7.7763	7.73375	6.1283	5.59758	5.56867	5.74102	5.89476	5.94871	3.8206	3.93295	3.19588	3.66549	3.21643	2.94324
Ebi3	1.91643	0.265362	1.01577	2.0009	-2.01667	-0.919068	-0.826232	-2.01667	-2.01667	-1.8171	0.113882	-1.56872	0.481437	0.750792	0.0385851	-0.432692
Scnm1	7.70582	6.05853	7.81146	7.46586	5.05687	5.25141	5.02739	4.67603	5.14163	4.72374	5.32995	5.14683	5.55424	5.77609	5.68627	5.91578
Tbcc	6.98703	5.60789	7.68977	7.10895	5.45494	5.07776	5.30851	5.2608	5.15629	4.45859	4.30491	4.20341	4.78144	4.83189	4.7169	5.18455
Rbm8a	8.83572	8.09033	8.67794	9.01455	6.69623	6.90098	6.79286	6.82457	6.76092	6.64864	6.5953	6.44717	6.27453	5.99755	6.65404	6.62488
Tmem30b	3.08382	1.51155	3.29242	1.59815	-2.01667	-2.01667	-1.774	-2.01667	-2.01667	-1.64182	3.15548	1.09536	0.103547	-0.0515152	0.580235	0.881523
Brms1	7.65902	5.6484	8.21425	7.36802	5.75048	5.69494	5.60401	5.5208	5.68722	5.5316	4.90661	5.20077	5.05314	5.07657	5.17808	5.36822
Maml3	5.01743	4.15226	5.16644	6.29919	2.65327	3.1818	3.43825	3.62223	2.93706	3.21761	3.17228	3.1803	3.3338	3.66549	3.19202	3.55057
Syngr2	8.61696	7.00995	8.90169	8.2016	6.84142	6.82176	6.6454	6.68225	6.70551	6.57621	6.06036	5.98872	5.3548	5.37989	5.10803	5.55463
Ctsc	7.50566	5.18757	7.34971	7.06799	2.55778	2.64552	3.36408	3.34831	2.6818	2.783	6.10917	6.69907	5.1233	5.1754	4.97302	5.5812
2810408A11Rik	2.70458	0.265362	1.9248	3.20764	-0.621382	0.127362	0.83691	0.928552	0.273337	0.429713	0.113882	-0.189397	1.06042	-0.0515152	0.0923493	0.258998
2019-03-02	9.46631	8.37391	10.0059	10.0217	7.37983	7.34863	7.50561	7.63831	7.58301	7.12056	7.96348	7.39742	7.32817	7.24509	7.74383	7.90518
Mindy1	9.35154	7.55723	8.63717	8.99181	6.71017	6.62305	6.50145	6.33859	6.58487	6.57843	7.04975	7.66254	6.30336	6.2083	6.4198	6.83624
Tnfsf12	7.33403	6.06041	7.84367	7.84329	4.95747	5.38385	5.76639	5.75372	5.32294	5.15334	5.09903	5.23219	5.25589	5.07657	5.29877	5.70716
NA	7.78743	6.8735	7.03894	7.48198	5.67853	5.53759	5.55623	5.48314	5.46448	5.12634	5.31111	5.0085	4.7669	4.80745	5.07001	5.27789
Jpt1	8.90931	7.27705	8.5781	8.00858	6.99628	6.91227	6.88912	6.80943	6.35918	6.74597	5.5644	5.33868	5.14969	5.21311	5.50734	5.50119
D17Wsu92e	9.95125	8.05357	10.5815	10.2837	7.84872	7.95841	7.9057	7.8002	7.98159	7.96717	7.54751	7.8339	7.95697	8.00819	8.07745	8.05939
Atp6ap1	10.2176	9.36637	10.9058	10.5421	7.96379	7.92033	7.8997	7.98131	8.0829	7.89056	8.3529	8.2295	8.46537	8.43656	8.69385	9.12126
Coq7	7.59903	5.15982	8.1969	7.50367	4.98067	4.9389	5.35073	5.4366	4.86251	4.31717	4.93643	4.81456	5.87324	5.78237	5.96644	6.26191
Rab26os	3.32861	-0.0869132	4.06418	3.39757	-1.52343	-0.919068	0.0238576	-2.01667	-1.61153	-0.395196	1.08807	0.502674	2.53812	2.39826	2.66242	1.88884
Fam35a	4.22264	2.75642	4.48482	5.04432	2.50755	2.1912	2.67886	2.17185	2.59837	2.75193	1.84284	1.83847	2.17678	2.10924	2.10535	2.01621
Prcc	8.58639	6.96555	8.61868	8.27172	6.4608	6.5057	6.15434	6.08568	6.46829	6.08273	5.96716	5.90454	6.0009	6.04014	6.14242	6.29299
NA	6.3257	4.7815	6.21004	6.8595	3.94079	4.62428	4.1909	4.27889	3.83071	3.58681	3.97221	4.13116	4.1316	4.27711	4.48282	4.21069
Rsph4a	3.01553	0.855625	2.68187	1.24949	-2.01667	-2.01667	-2.01667	-2.01667	-2.01667	-2.01667	-0.835841	0.197745	0.891991	1.74742	1.41417	1.55766
Tkt	9.65489	8.08895	9.92685	9.71432	7.15867	6.98252	7.01311	6.95959	7.16497	6.74646	7.38315	7.10949	7.9468	7.86746	7.98476	8.13774
H2afv	9.31561	7.03404	8.34187	9.30291	6.65788	6.99638	6.91045	6.80027	6.57702	6.63806	6.82648	6.62735	6.25729	6.4446	6.77918	6.768
Gipc2	4.09609	2.81098	4.33579	4.13879	1.70886	1.52433	2.00156	1.38581	1.06347	1.247	2.60696	1.94345	1.93811	1.64076	2.14405	2.52465
Phip	6.96457	4.33088	8.1785	8.29347	5.30494	5.14439	5.02338	5.13044	5.59098	5.69774	5.69803	5.71491	5.91119	5.80107	5.6753	4.82928
Cd300a	2.78883	-0.750659	0.599203	0.372173	-0.621382	-0.14484	-1.07867	-1.04771	-1.16025	-1.8171	-0.835841	-0.720139	0.573427	-1.0398	0.334682	-0.432692
Epas1	11.6974	13.1489	12.2629	13.086	10.7581	10.8255	10.9602	10.978	11.4744	11.3086	10.0937	10.6107	9.73903	9.65907	9.32865	9.94383
P2rx5	4.5224	0.548279	2.84348	2.53803	1.66371	1.42692	1.30172	2.09404	1.42807	0.951248	0.480538	0.754263	0.383179	1.26334	1.05664	1.02306
Actr8	7.71661	5.83546	8.17597	7.79462	5.507	5.45969	5.44819	5.28726	5.74332	5.3438	5.25307	5.43784	5.72818	5.80107	5.77525	5.71657
Raver2	3.48831	5.52056	3.26731	4.66352	-0.231908	0.727475	-0.339459	-1.04771	-0.307596	-0.466487	2.67927	2.94772	3.68775	3.55236	3.87928	3.20329
Tor1b	8.04464	6.48766	8.25273	8.14144	6.20516	6.15654	6.11719	5.94317	6.12336	5.96574	6.06936	5.81053	5.36931	5.18492	5.24489	5.19954
NA	2.30766	-0.226452	3.98169	2.96903	-0.231908	-0.00232876	0.365445	-0.0634934	0.174378	-0.327263	1.51426	1.80171	1.44836	1.11186	1.23454	0.548449
Rapgef4	8.72113	6.33004	9.78728	8.57796	5.36612	5.18964	5.43618	5.34719	4.98619	4.74953	7.01059	7.37492	7.75816	7.72627	7.6928	7.07156
2019-09-02	3.88266	1.10886	3.48984	3.55655	1.17742	0.954167	1.52238	1.62592	1.6283	1.20173	0.938958	1.03329	1.34774	1.40041	1.08343	1.12707
Rsph1	3.38383	2.89755	4.7158	4.24151	-0.621382	-0.919068	-0.424552	0.737046	-1.03654	-0.395196	0.480538	1.21202	3.3918	3.18585	3.21037	3.14254
Eml4	7.06934	4.87834	7.32407	7.25831	5.10411	5.14056	4.95344	4.93228	5.04164	5.09728	4.7698	4.74849	4.73489	4.52213	4.46509	4.49939
Fam53a	7.28773	6.13892	7.66836	7.7401	5.69265	5.78123	5.62136	5.76004	5.77638	5.4444	4.7698	4.7819	4.87253	4.84396	4.69317	4.50904
Itpripl2	8.68861	9.45343	9.69614	9.8848	8.09872	8.04765	8.11097	8.15423	8.0081	8.40638	6.49202	6.94751	5.67855	5.59512	5.448	5.77277
Esm1	4.79104	7.03021	5.74355	7.00652	5.20998	4.86644	5.37612	5.44446	5.56679	4.53587	3.48628	2.49717	0.995387	1.26334	1.73467	1.94684
Cish	5.48967	7.0002	4.56427	5.55707	4.59216	4.51594	4.34987	4.53592	4.35883	4.79976	2.67927	3.42955	2.83616	1.74742	2.84578	2.80894
Pycr2	7.83774	5.93911	7.56526	7.74643	5.40437	5.46277	5.32815	5.54293	5.34301	5.11265	5.49931	5.36096	5.47446	5.32928	5.49367	5.37087
Ing2	6.16161	4.97309	6.20013	7.4846	3.77022	3.70249	4.21571	4.27889	4.05938	4.17215	4.7698	4.66396	4.63168	4.52213	4.71904	5.04878
Rab29	7.34102	5.27102	7.64174	6.86264	5.20211	5.42542	5.13538	5.13044	5.18676	4.99981	5.34855	5.15414	4.31933	4.18523	4.25721	4.66405
Mblac1	4.09609	3.05651	4.81443	4.39052	1.41394	0.807063	1.9348	2.09404	1.78745	1.63539	2.55666	2.0725	2.49172	2.63894	2.34568	2.89249
Xpot	7.58143	6.38502	8.38591	8.39646	6.19527	6.11999	6.17347	5.90949	5.95842	5.87762	5.70959	5.93244	5.61503	5.34635	5.5891	5.5024
Lgmn	8.24059	6.66842	8.63134	8.02707	5.57869	5.49917	5.95821	5.91516	5.97322	5.96235	5.88546	5.78956	6.19531	6.27667	6.3642	6.46784
Slc15a4	7.15516	4.69712	6.92616	6.72019	4.91475	4.89404	4.22622	4.2612	4.66252	4.53815	4.76427	4.85549	4.25133	4.20408	4.52741	4.74597
Zfp954	5.76393	4.38583	5.59506	5.87638	3.8122	3.69205	3.61921	3.85234	3.93264	4.08134	2.8767	3.54526	2.96912	2.52362	3.08336	2.89249
Phf1	8.28478	6.64108	8.00567	8.07151	5.49738	6.00446	5.68622	5.72819	5.67596	5.55091	5.89561	6.32296	5.86416	5.94809	5.91141	5.79366
Bloc1s4	7.0179	5.34375	6.67489	7.11422	4.79946	4.78032	4.83029	5.03996	4.69635	4.58077	4.23466	4.26547	4.49721	4.47635	4.56355	4.82735
Ddi2	8.091	7.99587	8.36609	8.86067	6.90949	6.8896	6.59899	6.55734	6.90774	6.7839	5.99576	5.9989	5.64449	5.49917	5.51105	5.47556
Epb41	7.82782	9.63449	9.32696	8.35203	7.10689	7.12909	7.25548	7.22444	7.80186	7.83025	5.93798	5.80357	6.50663	6.43666	6.32684	5.89013
Zbtb7a	8.89869	8.00808	9.65424	9.6886	6.57495	6.65835	6.87194	6.83657	7.0944	7.03684	6.8709	7.18459	7.42627	7.40435	7.67997	7.86931
D17H6S53E	7.34102	6.06602	7.43462	7.01379	5.20998	5.10163	5.02939	4.90974	5.36281	4.96805	4.89654	4.95091	4.74234	4.74446	5.12425	5.11352
Gja4	7.22107	7.68138	6.56328	5.79051	5.19021	5.38709	5.69002	5.64878	5.60648	4.80356	4.00071	3.91585	4.78385	4.78258	4.22447	3.69295
Ndufb3	8.48745	6.91871	8.61992	8.95512	6.01376	6.04401	6.38516	6.35537	6.02561	5.6095	6.23645	6.03894	6.52258	6.50286	7.04423	7.16425
Pigc	6.55349	5.64339	7.07556	6.98077	5.11673	5.22991	4.92577	4.72848	5.06255	4.91294	4.53016	4.44306	3.87565	3.46127	4.13123	4.21365
Tagln	7.26952	6.87777	7.66536	7.49011	3.28032	2.90265	4.38155	4.11126	3.44671	3.46278	5.57075	6.10455	6.66137	6.42063	6.21768	4.80401
NA	1.91643	2.02374	3.12082	3.23002	2.02675	1.20982	1.32797	1.09759	1.17005	0.71392	0.368363	0.197745	-1.21434	-0.462639	-1.05553	-0.163589
Dnah9	3.08382	2.17004	3.70146	2.07696	-2.01667	-2.01667	-2.01667	-2.01667	-2.01667	-1.64182	1.34676	1.42036	2.22012	2.10924	2.25429	1.04977
Gpr157	4.87052	2.35275	5.28689	5.06002	3.20353	3.25459	3.58152	3.56569	3.45727	3.56015	1.84284	0.675177	1.29468	1.40041	1.0015	1.15194
Ncbp3	7.00475	6.20661	7.43109	7.64883	5.49738	5.51407	5.58373	5.4366	5.6995	5.66058	4.94623	5.0946	4.3424	4.24106	4.40528	4.05457
Med28	9.2021	7.22359	9.32011	9.14284	6.84648	7.39926	7.19303	7.22215	6.95462	7.05406	6.51196	6.82463	6.55044	6.43666	6.72862	6.79045
Ctsd	11.3023	8.21778	10.7299	9.76884	8.6968	8.59568	8.51787	8.527	8.77174	8.49143	8.33296	7.87706	7.97632	8.01086	8.06658	8.3678
Fahd1	6.6912	5.8977	6.94508	6.81485	4.85072	4.2501	4.56379	4.68933	4.37563	3.74902	5.00368	4.19634	4.66342	4.52213	4.87864	5.13863
Dna2	3.8438	-0.0869132	2.8091	2.5017	1.17742	1.57068	0.873016	0.516171	0.320382	1.511	0.113882	-0.720139	1.23958	1.52559	0.0923493	-0.508614
Usf2	7.44204	5.05824	7.99089	7.92251	5.14985	5.23351	5.51684	5.52821	5.40843	5.41247	5.2008	5.37354	5.58634	5.48383	5.66978	5.65156
Actb	13.6444	12.3871	13.4833	13.1196	11.4855	11.4269	11.3455	11.3543	11.2661	11.0117	11.2548	11.5159	10.6157	10.5726	11.0036	11.427
Gar1	7.46142	6.48905	7.12706	7.43789	5.4483	5.63077	5.61338	5.59329	5.13506	4.69748	4.25846	4.74849	5.00852	4.74446	5.17029	5.30448
Tmem125	4.12878	1.22055	3.87769	3.68362	-1.52343	-0.14484	-1.22365	-0.473252	-1.44492	-1.48555	2.00168	1.87432	2.75007	2.69332	2.36765	2.70353
Stk11ip	6.17732	4.5658	6.14778	6.54047	4.22348	3.87861	3.94171	4.05075	4.02073	4.00103	4.03786	3.63158	4.28233	4.29481	3.8287	3.71398
Mnt	6.91388	6.13892	7.46254	7.83556	5.18623	5.36425	5.2886	5.12066	5.374	5.36706	4.82397	5.34827	5.09254	4.80745	5.05316	5.48782
Bcl9l	7.02226	6.92491	7.2933	7.51596	5.29016	5.31064	5.07467	5.03996	5.72486	5.55878	4.75872	5.31605	4.78865	5.20377	4.90705	5.12456
Rab27a	6.58917	7.99832	6.85737	7.22144	5.75856	5.51407	5.63062	5.88659	6.53214	5.80853	4.71924	4.7629	3.5071	3.42959	3.78448	4.07422
Rem1	3.88266	0.631468	2.64335	2.59087	1.1117	-0.14484	0.682708	0.255258	0.918113	1.08192	0.584616	-0.0484876	2.07029	1.40041	0.542103	0.164382
Zbtb4	8.95447	8.71341	10.1556	10.4875	7.5988	7.83271	7.81087	7.87772	8.09013	8.30517	7.56272	7.68983	7.57625	7.51794	7.4269	7.64075
Arl2bp	8.67207	8.49026	9.86439	10.0088	6.72261	6.72133	7.00855	6.97596	6.9448	7.06832	7.50338	8.01141	7.78846	7.79004	7.69742	7.8366
Cisd3	5.08563	3.35462	6.67608	5.42143	2.53288	3.22591	3.27243	3.09226	2.81096	2.37751	3.77733	3.55634	3.73333	3.66549	4.41058	4.50904
Ptpre	6.41456	3.84756	6.88651	6.00443	4.7678	4.64609	4.43385	4.49108	4.27772	4.69748	2.63147	3.34265	3.86203	4.02484	3.57855	3.43879
