# Supplementary material for: Endothelial heterogeneity across distinct vascular beds during homeostasis and inflammation
Source: eLife journal article supplement (doi:10.7554/elife.51413), 2020-01-16
Supplement: supp [file elife-51413-supp-v1.zip › elife_poa_e51413_Supplementary_file_3.xlsx]

## Sheet: Most LogFC Ribotag Heart EC gen
	0H1_S	0H2_S	0H_S	0H_S.1	0H6_	0H7_	0L2_S	0La_S	0L6_	0L7_	0B1_S	0B2_S	0B_S	0B_S.1	0B6_	0B7_
Myl2	9.16774	9.93293	10.8287	10.8449	9.55298	9.42353	2.23904	1.10476	2.65245	1.61367	1.54419	1.22462	1.36429	1.96019	1.75744	1.43224
Myl3	8.46443	9.26775	9.56102	9.57041	8.61903	8.33842	1.82575	1.04532	1.80666	2.07581	1.54419	1.04754	1.04889	1.14814	1.0929	1.01078
Aqp7	8.86243	8.92473	8.56281	8.6308	9.27864	9.07097	2.55992	2.05208	1.62093	1.39341	0.98333	1.04754	0.98333	1.14814	1.03915	0.98333
Adprhl1	7.4498	6.57756	6.62385	6.6866	6.20097	6.14098	0.98333	1.04532	0.98333	0.98333	1.12814	1.04754	1.17171	1.14814	1.0929	1.06417
Ahsg	5.06198	4.68041	5.10195	5.02232	6.61535	6.59613	0.98333	1.10476	0.98333	1.03509	0.98333	0.98333	0.98333	0.98333	0.98333	1.01078
Slc28a2	6.99533	7.25365	6.78353	6.84938	6.85488	7.07272	1.97705	1.46374	1.04372	1.13335	1.05755	0.98333	1.01648	1.14814	0.98333	1.06417
Xirp2	6.31541	6.62774	6.02614	5.92255	6.29082	5.9802	1.6567	1.26965	1.04372	0.98333	0.98333	0.98333	0.98333	1.14814	1.0929	1.03772
Mb	10.2131	10.6018	10.912	10.9318	10.208	9.65298	4.71585	2.446	4.78141	3.71135	2.13016	1.04754	1.14197	1.29605	1.31267	1.16536
Btnl9	10.0038	9.94741	9.97507	10.0532	9.99131	9.99832	2.9739	4.06463	3.7698	3.41675	1.86672	1.95105	1.53417	1.666	1.70663	1.94038
Ckmt2	7.49883	8.03035	8.33038	8.368	7.55013	7.05969	2.46068	1.67456	3.33494	1.83424	1.05755	0.98333	0.98333	0.98333	0.98333	1.09014
Lrtm1	4.93946	5.32227	5.01575	5.16235	5.06976	4.64809	0.98333	0.98333	0.98333	1.35319	1.05755	0.98333	0.98333	0.98333	0.98333	0.98333
Fabp4	14.3849	14.1522	14.0183	14.0333	14.1558	13.9093	8.37682	7.9449	7.85922	7.49932	3.04257	2.71498	2.04864	2.85615	3.34579	3.79732
Meox2	8.01197	8.57288	8.3935	8.37829	8.43906	8.85495	3.17513	2.73644	2.17393	3.20146	1.05755	1.10901	1.08059	1.43019	1.24307	0.98333
Ckm	7.08583	7.84066	8.25735	8.18892	7.17227	7.48953	2.90007	1.41761	2.8682	2.29333	1.38033	0.98333	1.04889	0.98333	1.37907	1.06417
Actc1	8.85899	9.61926	10.2123	10.213	9.22315	9.21231	4.2351	3.59047	4.43195	3.41187	0.98333	1.04754	0.98333	1.14814	1.06627	0.98333
Pln	8.89576	9.09469	9.47343	9.43839	8.94968	8.62525	1.46517	1.04532	2.81722	1.43254	1.64393	1.38232	3.85581	3.46846	2.80092	1.30496
C1qtnf9	10.2257	9.63417	9.69019	9.70778	10.5081	9.82559	3.69513	2.92961	3.56869	3.17862	3.14825	3.50267	3.42699	3.23177	2.67443	3.40063
Ttn	9.83698	9.00445	7.89866	7.7666	7.97291	7.78736	3.04414	2.57769	3.85653	2.73012	1.19544	1.27912	1.74667	1.96019	1.92978	1.14072
Wt1	6.64221	6.69204	6.16913	6.22139	6.40025	6.2617	1.46517	1.50844	2.79981	2.10031	0.98333	1.04754	1.01648	0.98333	1.03915	0.98333
Tmem182	5.68468	5.41727	5.67375	5.76827	6.05475	5.91858	0.98333	1.21675	2.00195	1.15691	1.05755	1.10901	1.4638	0.98333	1.35727	1.16536
Csrp3	6.42433	6.8935	7.41942	7.34756	6.52473	6.29912	2.65276	1.75096	2.85141	1.77458	1.49161	0.98333	0.98333	1.14814	1.01151	0.98333
Nrap	6.40044	6.74983	6.25115	6.4058	6.024	5.97264	1.97705	1.16184	1.80666	1.59655	1.25974	1.27912	1.41491	1.14814	1.40054	1.25991
Cxcl9	6.92053	6.49284	6.46437	6.3691	6.273	6.57963	1.24427	2.30107	1.58073	1.56168	1.43704	1.10901	1.04889	1.77087	1.19473	1.41179
Nppa	4.81592	4.84029	6.34492	6.35249	7.45023	7.9838	2.11398	1.8926	2.37536	1.20289	1.32129	1.10901	1.57925	0.98333	1.50335	1.65738
Trim54	5.20279	5.34578	4.98309	5.06374	5.02785	4.58558	0.98333	1.04532	1.80666	1.00944	0.98333	0.98333	1.22941	0.98333	1.14471	1.28261
Eda2r	5.53288	5.29492	5.50999	5.35814	5.1238	5.43243	1.24427	1.75096	0.98333	1.03509	1.32129	1.04754	1.04889	0.98333	1.2191	1.32697
Rbp7	9.95133	10.7705	10.3942	10.4287	10.0722	10.606	5.82917	4.98076	5.54231	4.65301	2.38202	2.91755	1.76629	1.77087	2.39312	2.32639
Cd300lg	10.5322	10.4698	10.5019	10.5189	10.859	10.6264	3.04414	6.89041	4.66127	4.04061	3.3537	3.21182	2.49923	2.47664	2.98273	2.80539
Papln	5.24172	5.146	5.13949	4.97969	5.31014	5.6743	0.98333	1.10476	1.40771	1.22535	1.05755	1.43127	1.33831	1.43019	1.06627	1.09014
Tnnt2	9.53691	10.0046	10.0873	10.0981	9.28347	9.0747	4.89758	3.83821	5.32531	4.71184	2.09535	1.81009	2.52249	2.53736	2.84074	2.72479
Obscn	8.66499	8.30079	7.63615	7.68932	7.40798	7.65716	3.11112	1.92594	3.02622	2.05088	2.35284	2.79198	2.40222	2.41325	2.28183	2.50109
Fsd2	4.6052	4.68569	4.76985	4.79529	4.52413	4.48052	0.98333	1.32067	0.98333	1.54392	0.98333	1.22462	1.22941	0.98333	1.03915	1.16536
Tbx20	3.88457	4.00568	4.73839	4.52574	4.24816	4.52714	0.98333	1.21675	1.53938	1.00944	0.98333	0.98333	1.20085	0.98333	1.16993	1.01078
Myh6	10.4154	10.6894	10.2786	10.2779	9.6137	9.81071	3.35169	7.16888	4.57181	4.32161	1.19544	0.98333	1.17171	0.98333	1.14471	1.01078
Hrc	6.9301	7	7.41675	7.41911	6.83578	6.65557	2.65276	1.26965	2.42161	2.17142	1.38033	1.33164	2.52249	2.59562	1.58062	1.28261
Apobec2	4.32248	4.71693	5.38116	5.41525	4.51405	4.3672	1.6567	1.10476	0.98333	1.61367	1.05755	0.98333	1.38982	0.98333	1.0929	1.16536
Gata4	3.78266	4.02245	4.28841	4.23081	3.87543	4.48289	0.98333	1.32067	1.58073	1.20289	0.98333	0.98333	0.98333	0.98333	0.98333	0.98333
Myoz2	6.97353	7.06114	7.78185	7.80679	7.17547	6.83259	3.17513	1.85847	4.05297	2.61579	1.25974	0.98333	1.08059	1.14814	1.24307	1.18958
Rpl3l	5.02228	5.5359	5.60295	5.53787	5.00644	4.84128	0.98333	0.98333	1.93975	1.18008	1.25974	1.16797	1.41491	1.43019	1.48336	1.11565
Myom2	7.23123	6.88664	7.44363	7.51554	6.73195	7.04815	2.35411	1.46374	2.44419	2.68223	2.41062	1.81009	1.62296	2.04628	1.98767	2.0503
Mylk3	6.34253	6.41083	6.88813	6.74186	6.17481	6.2863	2.74	1.67456	2.03208	2.17142	1.19544	1.22462	1.36429	1.96019	1.42169	1.6043
Hfe2	4.98146	5.42359	5.55375	5.46246	5.21064	4.77328	1.6567	0.98333	0.98333	1.45171	0.98333	1.04754	1.64433	1.29605	1.44254	1.32697
Art1	4.30052	4.75255	5.05361	5.07391	4.26929	3.88477	0.98333	1.16184	1.21107	1.45171	1.19544	1.04754	1.14197	1.29605	1.03915	1.18958
Dhrs7c	4.46089	4.4332	4.79123	4.70657	4.04957	3.86312	1.97705	1.04532	1.361	1.20289	0.98333	1.04754	0.98333	0.98333	0.98333	0.98333
Klhl31	3.9234	4.07965	4.23739	4.41809	4.02137	3.78086	0.98333	1.04532	1.04372	1.29069	0.98333	1.04754	1.04889	1.14814	1.19473	1.06417
Ppp1r3a	4.13669	3.88248	4.28171	4.11739	4.14739	3.88477	1.24427	1.04532	1.66004	0.98333	0.98333	1.04754	1.08059	0.98333	1.03915	0.98333
Lrrc39	4.48704	4.85441	4.86031	4.79529	4.53165	4.24142	1.6567	1.04532	0.98333	0.98333	1.12814	1.16797	1.28488	1.43019	1.0929	1.03772
Hspb7	7.40076	7.81322	8.52413	8.57102	7.71242	7.22012	4.29394	2.32626	3.64865	3.23504	2.29265	2.16877	2.14173	1.666	1.88478	2.08945
Mybpc3	8.52919	9.11731	8.69191	8.71363	8.11247	8.00393	4.6271	1.16184	3.83106	3.62531	2.29265	2.383	3.37681	3.49931	2.93938	2.33727
Itgb1bp2	4.6637	5.06737	5.03381	5.39916	4.52413	4.10669	1.46517	0.98333	0.98333	1.10941	0.98333	1.10901	1.5111	1.666	1.40054	1.03772
Trim72	5.10061	5.30523	5.60564	5.71727	5.24153	4.90446	0.98333	1.26965	0.98333	0.98333	1.25974	1.47862	1.4638	2.04628	1.48336	1.23685
Fitm1	2.83071	3.5992	3.82313	4.13692	3.34902	3.01782	1.46517	0.98333	0.98333	0.98333	0.98333	1.04754	1.01648	0.98333	0.98333	1.03772
Tnnc1	7.61754	8.18964	8.90144	8.90522	7.86127	7.4995	3.55782	2.32626	4.4149	4.10863	2.41062	1.81009	2.8328	2.70554	2.49644	2.74128
Tcf15	6.77553	7.66623	8.09343	8.06566	7.80449	7.23002	1.6567	1.71327	3.33494	2.76119	2.43867	2.88277	2.96605	2.75751	2.74327	2.79753
Tnni3	8.14575	8.89772	9.628	9.63495	8.46497	8.21516	5.00714	2.59852	5.84348	4.58301	1.69132	1.27912	2.24325	2.53736	2.2585	1.58616
Ankrd1	8.49777	7.18175	7.16245	7.12599	7.26199	6.73369	3.45843	3.30391	4.14544	3.55614	1.19544	1.43127	1.04889	1.14814	1.19473	1.14072
Myo18b	5.96614	6.03457	5.72774	5.61651	5.22617	5.6312	1.24427	1.36996	0.98333	0.98333	1.78169	1.56889	1.74667	2.34694	1.61776	1.6399
Fam89a	4.65219	4.99274	4.6052	4.48059	4.32802	4.76553	0.98333	1.04532	0.98333	0.98333	1.32129	1.56889	1.4638	1.14814	1.37907	1.69171
Sgca	3.19043	3.58797	3.9886	3.99428	3.25529	3.21866	0.98333	0.98333	0.98333	0.98333	1.05755	1.04754	1.31184	1.14814	1.11904	1.16536
Kcna5	9.22884	7.99255	7.82885	7.78529	8.47475	7.77558	0.98333	1.10476	1.97119	0.98333	4.91449	3.69535	3.86948	3.5591	3.64912	3.85147
Timp4	10.0634	9.63706	9.44569	9.50192	10.3687	10.1955	4.10969	2.9781	3.83106	3.19009	4.43293	4.55346	5.57335	5.69332	5.94317	5.31903
Fabp5	9.45604	8.26512	8.06299	8.13651	8.8877	8.11988	2.82225	3.41374	2.96507	1.94662	3.2625	3.00099	4.23606	4.22693	4.67645	4.39007
Myom1	7.59742	8.06718	7.85673	7.85181	7.15087	7.38361	4.55676	2.13994	3.82246	3.31049	1.59492	1.38232	3.21485	3.03525	2.46621	1.65738
NA	5.32383	7.28178	7.11566	7.21599	5.16143	6.97688	1.82575	1.26965	1.04372	1.10941	1.19544	2.07945	3.29134	2.94848	2.02961	3.37445
Cdh23	4.58717	5.03468	4.90241	4.48059	5.46602	5.18011	1.46517	1.21675	0.98333	1.50774	1.43704	1.27912	1.74667	1.55291	1.61776	1.5492
Txlnb	5.86005	5.96036	6.36882	6.28405	5.98438	6.14398	1.24427	1.26965	1.04372	1.52595	2.05967	2.27986	2.25719	2.53736	2.13584	1.99639
Brip1	4.93471	4.03902	4.3149	3.99428	4.01781	4.26362	1.82575	1.5518	0.98333	1.24746	1.25974	1.22462	1.17171	0.98333	1.14471	1.34865
Pparg	7.31393	7.05504	6.80763	6.76715	7.04894	7.1065	3.2952	3.22575	3.02622	2.27192	1.59492	1.69453	2.37691	3.19455	2.28183	2.06347
Cep55	4.21703	3.64323	3.90388	3.48602	3.01191	3.95124	1.46517	1.10476	0.98333	1.33266	1.12814	1.04754	1.25741	1.14814	1.0929	1.03772
Ulbp1	5.58225	4.76257	5.05361	5.05349	4.97002	5.23592	1.24427	2.55656	2.76436	1.69637	1.12814	1.27912	1.31184	0.98333	0.98333	1.11565
Cox8b	5.42539	6.06726	6.34733	6.16065	5.55968	4.87412	2.55992	1.50844	2.72801	1.74381	1.69132	1.33164	1.78565	1.55291	1.89994	1.96866
Cmya5	7.00442	7.30852	6.78827	6.83151	6.65087	6.77484	2.74	1.71327	2.14665	1.15691	1.94702	2.1396	3.16397	2.94848	2.78468	2.88913
Srl	6.19759	6.54456	7.05261	7.02215	6.34728	6.44891	1.82575	1.59389	2.42161	2.02551	2.05967	1.95105	2.70643	2.70554	2.69195	2.72479
Cox6a2	6.16758	6.82823	7.57067	7.53407	6.47816	6.17065	2.35411	2.05208	3.45098	2.31443	1.69132	1.73408	2.85129	2.27745	2.53578	3.32609
Tcap	9.81891	8.89942	9.05777	9.12595	8.59037	7.87423	6.05858	2.63929	5.89356	4.94787	1.86672	1.65385	2.46361	2.53736	2.87181	2.6482
Aplnr	9.09147	9.45582	9.11353	9.11491	9.08726	9.09641	5.18866	5.98911	5.30078	5.19115	2.57126	3.28022	2.41471	2.47664	1.97341	3.08265
Ifi204	5.42877	5.22419	5.12272	5.35814	5.41681	5.38005	3.11112	1.92594	1.8411	1.91933	1.25974	1.16797	1.22941	1.43019	1.37907	1.25991
Colec11	4.23257	4.65375	4.70872	4.78295	4.86287	4.68351	1.46517	1.21675	1.04372	0.98333	1.32129	1.04754	1.41491	2.12752	1.44254	1.47229
Ebf3	6.22505	6.23133	6.07054	5.98855	6.43607	6.84507	1.24427	1.46374	0.98333	0.98333	1.94702	2.33235	2.53399	2.53736	2.91721	2.74945
Rsad2	8.40822	8.23935	8.33948	8.39157	8.19368	8.6763	4.00791	2.96212	3.23488	4.60458	4.32438	4.26023	3.72151	3.87362	3.112	3.04331
Tmem255b	6.0865	6.4156	5.90821	5.85339	5.90172	5.79543	1.82575	2.87944	0.98333	0.98333	2.19737	2.43193	1.80476	1.96019	1.86946	2.06347
Tfpi2	4.6464	4.33592	4.26482	4.40204	4.23287	4.15796	1.24427	1.32067	1.04372	0.98333	1.64393	1.47862	1.11161	1.666	1.16993	1.28261
Top2a	6.08222	5.3491	5.74853	5.82958	4.7706	6.1007	1.82575	3.09995	2.2528	1.94662	1.38033	1.38232	1.78565	1.666	1.37907	1.67464
Smpx	4.91076	5.3018	5.99576	6.12197	5.32752	4.98516	1.6567	1.36996	2.46642	2.02551	1.05755	1.33164	1.93184	2.20443	1.97341	1.88211
Abra	3.47812	2.89212	2.51959	2.98041	2.80419	2.51512	0.98333	1.04532	0.98333	0.98333	0.98333	1.04754	1.04889	1.14814	1.03915	1.11565
NA	5.64748	5.47018	5.21528	5.16235	5.20439	5.05046	1.24427	1.26965	1.04372	1.00944	1.32129	1.65385	1.87874	2.27745	1.85398	2.21278
Mylk4	5.00428	4.83556	3.81851	4.28435	4.40643	3.98169	1.6567	1.26965	2.22699	1.29069	0.98333	0.98333	1.7066	1.43019	1.33514	1.01078
Lrrc2	4.57503	4.50058	5.09049	5.36644	4.473	4.43723	0.98333	1.16184	0.98333	1.31182	1.38033	1.65385	1.82361	1.666	1.91493	1.39105
Aurkb	4.06035	3.53051	3.73269	3.71121	2.84498	3.81883	1.46517	1.41761	0.98333	1.39341	0.98333	1.04754	1.08059	1.29605	1.2191	1.03772
Smyd1	5.3129	5.72194	5.85955	5.97233	5.49066	5.24012	1.24427	1.41761	1.58073	1.57922	1.73721	1.56889	2.22918	1.96019	2.46621	2.2707
Cd36	12.844	12.569	12.5148	12.5443	12.8638	13.2195	9.12763	10.1508	9.30176	8.91961	1.69132	1.43127	2.01622	2.04628	1.63598	1.85207
Adamts7	4.06035	3.90074	4.06862	3.81187	3.85959	3.71392	1.46517	1.5518	0.98333	1.37344	1.59492	1.16797	1.08059	0.98333	1.0929	1.28261
Pbk	4.46747	4.06354	4.47617	4.43397	3.19976	4.58779	1.46517	1.7877	0.98333	1.08506	1.12814	1.04754	1.48764	1.55291	1.48336	1.25991
Ssu2	5.49471	5.2422	5.37488	5.39105	5.48421	4.9115	2.23904	1.32067	0.98333	1.59655	2.02309	2.19735	1.91436	1.77087	1.56169	1.5678
Sgcg	3.91379	3.98015	4.59982	4.4958	3.69083	3.77314	0.98333	1.21675	0.98333	1.39341	1.38033	1.47862	1.36429	1.14814	1.35727	1.6399
Lmod3	3.10855	3.50687	3.79518	4.05715	3.03325	3.06282	1.46517	1.04532	0.98333	1.06029	1.05755	1.16797	1.22941	1.43019	1.03915	1.09014
Perm1	5.40152	5.69865	5.60161	5.57415	5.07834	4.81897	3.04414	1.92594	2.94937	2.06339	1.43704	1.10901	1.43956	1.29605	1.58062	1.28261
Ntf3	4.88148	5.08743	5.05753	5.34979	5.31451	4.85597	0.98333	1.36996	2.14665	1.84877	1.64393	1.47862	1.72677	1.55291	1.88478	2.12757
Vash1	5.82716	5.51235	5.02581	5.06374	5.12546	6.18889	0.98333	1.5518	1.87474	2.1481	1.98556	2.98468	1.96619	1.29605	1.65397	1.5492
Klhl41	3.10855	3.30235	3.73269	3.95079	3.2247	3.29609	1.46517	1.10476	1.73521	1.33266	0.98333	1.16797	1.04889	1.14814	1.01151	1.06417
Ckap2	4.70329	4.28818	4.6987	4.83171	3.55974	4.45422	1.97705	2.39929	0.98333	1.71236	0.98333	1.04754	1.25741	1.14814	1.28984	1.37
Ifi211	2.65727	2.67596	2.73108	2.69432	2.59053	3.13685	0.98333	1.26965	0.98333	0.98333	1.05755	1.10901	1.01648	0.98333	1.06627	0.98333
Ablim3	9.24066	9.31934	9.26865	9.28925	9.72353	9.59062	3.55782	4.93646	3.85653	3.37217	4.92939	4.68038	5.63869	5.56794	5.52621	5.63682
Tnni3k	3.47812	3.83581	3.72283	4.07751	3.57437	3.38484	1.24427	1.21675	1.62093	1.74381	1.05755	1.04754	1.36429	0.98333	1.16993	1.16536
Corin	4.40711	4.50058	4.94755	5.16235	4.60948	4.67733	1.82575	1.10476	2.11885	1.29069	1.19544	1.612	1.80476	1.77087	1.56169	1.32697
Trim55	2.83071	3.56526	2.95814	3.10466	2.74507	2.80727	1.82575	0.98333	0.98333	0.98333	1.05755	1.04754	0.98333	1.14814	0.98333	0.98333
Popdc2	5.35966	5.76243	5.96263	5.85339	5.60313	5.05683	2.74	2.16808	2.00195	2.26109	2.35284	1.88229	1.53417	1.96019	1.68929	1.74171
Ncapg	3.673	3.11177	3.64143	3.85968	2.4389	3.72195	1.46517	1.46374	0.98333	1.37344	0.98333	1.10901	1.31184	1.14814	0.98333	1.18958
Art3	6.80312	6.83892	6.62053	6.67662	6.73412	6.37564	1.97705	2.24934	2.69073	2.40574	2.02309	1.84664	3.69103	3.69857	3.1378	1.85207
Fam198b	9.00813	8.61011	9.07603	9.06671	8.58511	9.00795	5.14138	6.08076	4.64674	5.42496	4.30165	4.62885	3.79501	3.43693	2.96122	3.46655
Tk1	4.09478	3.26055	3.7522	3.603	2.57121	3.67303	1.46517	1.50844	0.98333	1.35319	1.12814	1.10901	1.31184	1.29605	1.03915	1.11565
Tmc8	4.32972	4.45807	4.06081	4.31896	4.1144	4.16092	1.24427	2.32626	0.98333	1.84877	1.59492	1.27912	1.33831	0.98333	1.19473	1.25991
Fbxo40	4.53171	4.66981	4.88483	5.01178	4.48596	4.47101	1.6567	1.16184	2.32758	1.74381	1.86672	1.47862	1.55689	1.43019	1.68929	1.6043
Pkhd1l1	3.76138	3.96288	4.37908	4.26672	4.28716	4.52024	1.6567	1.95852	1.87474	1.39341	1.32129	1.22462	1.14197	1.77087	1.11904	1.06417
Dlgap5	3.28291	2.58857	2.90682	2.58479	2.11791	2.95782	0.98333	1.32067	0.98333	1.24746	1.05755	1.04754	1.08059	0.98333	1.06627	1.06417
P2ry2	5.87251	5.27756	5.8403	5.75569	5.02431	5.57461	2.46068	2.82746	1.62093	1.72817	1.94702	2.19735	2.21497	2.04628	1.50335	1.91154
Cenpf	5.17892	4.64836	5.25686	5.34979	4.09762	5.35571	1.97705	2.05208	1.2628	3.56056	1.25974	1.22462	1.43956	1.43019	1.40054	1.34865
Adh1	8.40479	7.63181	7.74397	7.85329	9.33905	8.13652	5.04189	4.92414	4.25806	5.15066	3.85819	4.19794	3.27088	3.19455	3.32348	3.59906
Kif20a	4.24795	3.58797	3.77623	3.63083	3.05427	4.24421	0.98333	2.446	0.98333	0.98333	1.25974	1.22462	1.14197	0.98333	1.28984	1.11565
Meox1	8.22754	8.18406	7.94604	7.98442	7.86052	7.75149	3.85998	5.54471	2.2528	4.23296	3.3537	3.74461	3.64407	3.67173	3.09234	4.12078
Zfp979	6.39182	6.377	6.43448	6.45332	6.21193	6.70152	1.6567	2.59852	0.98333	1.15691	3.89914	3.51408	2.53399	2.59562	2.21068	2.6128
Rad51ap1	4.32248	3.72747	3.90388	3.71121	3.86356	3.87399	0.98333	1.36996	0.98333	1.22535	1.49161	1.43127	1.57925	1.29605	1.4631	1.41179
Asb14	3.47812	4.18768	3.85958	3.90595	3.50987	3.3899	2.55992	1.71327	1.73521	1.13335	1.05755	0.98333	0.98333	0.98333	1.01151	0.98333
Ccnb2	4.8913	4.09559	4.79829	4.80754	3.52501	4.67733	2.35411	2.27544	1.66004	2.26109	1.19544	1.10901	1.28488	1.29605	1.44254	1.21341
A530016L24Rik	5.32383	3.08008	3.31383	3.48602	5.95859	2.71362	0.98333	1.16184	2.98061	0.98333	2.46618	1.04754	1.38982	1.43019	1.52306	1.06417
Abcb4	3.54189	4.4015	4.1809	4.33597	4.06346	4.31766	0.98333	1.04532	1.77138	1.00944	1.54419	1.43127	1.87874	1.14814	1.94447	1.5678
Eno3	6.67102	7.55176	7.98135	7.93507	6.73737	7.08484	3.65079	2.27544	3.54799	2.01266	3.6095	3.49117	4.05643	4.36734	3.74035	3.54844
Mlf1	4.31519	4.70659	5.32524	5.23666	4.48853	4.36976	1.97705	2.37536	0.98333	1.59655	1.69132	1.69453	1.94912	1.29605	1.86946	1.79005
Rflnb	9.57208	9.56949	9.2361	9.22282	9.56859	9.5787	3.77991	5.69489	4.74095	3.82598	6.0639	6.69309	5.29802	5.00559	5.49037	5.77532
Lpin3	5.48501	4.58203	4.36012	3.92855	4.92126	3.79997	1.82575	1.99039	1.53938	1.45171	1.82483	1.81009	1.84222	1.14814	1.91493	1.41179
Synpo2l	4.35834	4.60448	4.56989	4.71958	4.0738	4.01479	3.17513	1.21675	1.45295	1.47063	1.25974	1.04754	1.53417	1.77087	1.31267	1.01078
Abcb1b	4.55662	4.33592	4.99951	4.95788	4.79371	4.90798	0.98333	1.82352	0.98333	1.10941	2.09535	1.81009	2.06457	1.96019	1.89994	1.85207
Lnx1	7.19994	6.5818	5.95738	5.78694	7.0185	6.08052	1.46517	1.59389	1.40771	1.93304	2.71579	2.50235	3.72653	3.87362	3.67578	3.17655
Slc26a10	7.21958	7.53724	7.2902	7.38276	6.99875	7.04415	3.60505	2.27544	2.48832	2.49161	3.13117	3.72511	4.50786	4.52558	3.20035	2.99602
Asb10	3.39767	3.66476	3.72776	3.63083	3.38266	3.08792	2.11398	1.04532	1.45295	1.31182	1.25974	1.10901	1.20085	1.43019	1.16993	1.01078
Ttk	3.36983	3.01453	2.94971	3.14381	2.26944	3.08169	0.98333	1.21675	0.98333	1.43254	0.98333	1.16797	1.25741	1.43019	1.03915	1.11565
Kntc1	2.78926	2.34368	2.7699	2.46626	2.06364	3.02434	0.98333	1.16184	0.98333	0.98333	1.05755	1.04754	1.28488	0.98333	1.24307	1.03772
Col4a1	12.0218	11.0266	11.1098	11.089	11.6124	11.4052	7.80628	8.76092	7.87593	7.93191	6.58525	6.48711	7.31475	7.2273	6.66425	6.80401
Lmod2	4.14493	4.54769	5.20823	5.41525	4.69898	4.68762	1.6567	3.89824	1.80666	1.4893	1.25974	0.98333	0.98333	0.98333	1.11904	1.01078
Pimreg	4.48055	3.71721	3.96788	3.92855	2.90022	4.21032	1.82575	2.37536	0.98333	2.05088	1.05755	1.04754	1.08059	1.43019	1.16993	1.21341
Mypn	3.57885	3.90978	3.88632	3.76242	3.65916	3.42479	0.98333	1.21675	1.53938	0.98333	1.25974	1.33164	1.62296	1.55291	1.50335	1.4524
Lama4	8.92685	8.67419	8.68684	8.74101	8.57302	8.67876	4.37793	3.81171	3.20874	3.21274	5.69679	5.75926	5.21298	5.24285	4.86588	5.2659
Eepd1	7.19598	7.02414	6.88978	7.043	7.3293	6.99025	3.11112	2.75511	3.49491	2.77648	3.53351	3.76385	3.82806	3.75079	3.45756	3.67395
Lrrc14b	3.29777	3.232	3.68778	3.57463	3.10217	2.7997	1.46517	0.98333	1.93975	1.10941	1.25974	1.33164	1.11161	1.29605	1.24307	1.18958
Nr5a2	4.44095	4.07162	4.55051	4.55508	4.32226	4.57231	2.35411	2.37536	1.49681	2.18294	1.43704	1.52446	1.31184	1.77087	1.24307	1.21341
Cavin4	3.65003	3.84526	4.10702	3.883	3.67734	3.41491	1.24427	1.46374	1.45295	1.45171	1.12814	1.33164	1.64433	1.666	1.4631	1.32697
Ldb3	6.17766	6.46551	6.43448	6.40177	6.04165	5.97264	3.11112	1.85847	3.28578	3.35699	2.35284	2.16877	3.24314	3.15634	2.91721	2.77369
Kcnj5	3.28291	3.88248	4.28171	3.76242	4.00347	3.77314	1.46517	1.16184	0.98333	1.18008	1.32129	1.16797	1.53417	1.77087	1.75744	1.82139
Fbln2	8.08657	7.85068	7.78452	7.77597	8.4297	7.91732	4.77901	4.56012	3.22187	4.60244	3.98723	4.33931	4.60642	4.85867	3.74455	4.16115
Depp1	9.71847	9.57572	8.31467	8.24962	10.1697	9.67599	6.77833	7.122	5.79818	5.36048	5.66746	5.98713	3.86494	3.9868	4.75773	4.5007
Pclaf	4.22482	3.79735	4.00089	4.19399	3.14853	4.26637	1.6567	1.95852	2.53113	2.32487	0.98333	1.27912	1.17171	1.29605	1.06627	1.28261
Ect2	3.93294	3.58797	3.59895	3.21905	2.82065	4.14606	1.46517	1.5518	0.98333	1.33266	1.38033	1.22462	1.38982	1.77087	1.24307	1.30496
Cav3	3.34143	3.5992	3.69788	3.83597	3.21228	2.67273	2.65276	1.32067	1.2628	1.74381	1.12814	0.98333	1.01648	0.98333	1.06627	1.11565
F2rl3	3.46502	3.58797	3.94262	4.01554	3.35468	3.33854	2.46068	1.46374	1.93975	1.31182	1.05755	0.98333	1.22941	1.55291	1.03915	1.06417
Mest	7.53611	7.23937	7.5028	7.59006	6.89671	7.59369	3.93584	3.58003	1.90761	3.2295	3.23077	3.45612	4.30477	4.22693	4.34386	4.46641
Scn5a	5.17892	5.09538	4.97064	4.9019	4.91361	4.38249	2.35411	2.16808	1.2628	1.59655	1.54419	1.56889	2.04864	2.53736	2.19847	1.91154
Melk	4.27822	3.48284	3.67761	3.99428	2.74507	3.78086	1.6567	1.5518	2.27816	2.07581	1.05755	1.22462	1.28488	1.29605	1.19473	1.18958
Shcbp1	3.87469	3.08008	3.24662	3.06442	2.62841	3.63096	0.98333	1.46374	0.98333	1.74381	0.98333	1.04754	1.4638	1.55291	1.31267	1.21341
Cenpi	2.74659	2.14359	2.41327	2.9365	2.02155	2.85922	1.24427	1.10476	0.98333	0.98333	1.12814	1.10901	1.28488	0.98333	1.11904	1.09014
Enpp3	4.51273	4.44569	5.34627	5.38289	4.4037	5.01818	2.23904	1.8926	1.45295	1.4893	2.49318	2.43193	1.72677	1.96019	1.77399	2.06347
Papss2	7.49158	7.28091	7.60831	7.68601	8.20195	7.6821	3.35169	3.64153	2.69073	3.65042	4.55326	4.22595	4.41455	4.3335	4.66319	4.54832
Fam19a3	3.50397	3.65404	3.47522	3.32504	3.26133	3.28528	1.24427	1.7877	0.98333	0.98333	0.98333	0.98333	1.5111	1.43019	1.40054	1.65738
Xirp1	3.88457	4.21712	3.40913	3.48602	3.30876	3.24121	1.24427	2.08197	0.98333	1.41311	1.19544	1.04754	1.60127	1.77087	1.31267	0.98333
Tmem88	8.13906	8.42581	8.65787	8.67823	8.56098	8.12406	4.81962	6.14411	5.06252	4.05008	4.84807	5.22951	4.24658	3.84987	4.42468	4.51994
NA	5.68186	6.24032	6.61654	6.61527	5.81506	5.39647	1.97705	1.04532	1.69812	1.80472	2.43867	2.383	3.38952	3.1171	3.87682	3.66534
Nos2	6.76086	6.94938	6.59644	6.5512	6.58738	6.80353	2.90007	4.69677	2.00195	2.12441	3.29355	4.03328	2.8046	2.90306	2.85636	3.07617
Bub1	3.60297	2.58857	3.0158	3.42376	2.4282	3.44921	2.46068	1.63479	0.98333	1.24746	0.98333	1.04754	1.04889	0.98333	0.98333	1.09014
Col28a1	3.42499	2.79786	2.817	3.02303	4.04257	3.46845	1.46517	1.04532	0.98333	1.00944	0.98333	1.22462	1.7066	1.55291	1.61776	1.09014
Mycn	6.19363	6.56187	6.03314	6.01518	5.84453	5.21897	2.9739	3.8206	0.98333	2.25018	2.05967	2.93463	2.99129	2.65163	2.6567	2.81321
Gtse1	4.21703	3.66476	3.92982	4.13692	2.98296	3.3899	1.46517	1.8926	1.62093	1.56168	1.59492	1.38232	1.41491	1.55291	1.16993	1.28261
Cdh13	8.66928	8.40478	8.69852	8.68406	8.71196	8.61112	4.26482	4.71596	4.79025	4.63216	3.88901	4.51423	5.55655	5.60388	5.5323	5.80306
Col15a1	8.1922	7.4076	7.74731	7.76503	7.92829	7.44256	4.43133	5.06172	4.47644	3.58247	4.43989	4.07239	4.26739	4.11186	3.74455	4.28999
Ercc6l	3.22192	3.28855	3.25348	3.3916	3.02617	3.44921	1.46517	1.63479	1.10169	1.9055	1.64393	1.27912	1.04889	0.98333	1.11904	1.06417
Slfn9	5.03563	4.77746	5.07508	4.78295	4.34803	5.42506	2.82225	2.37536	2.90122	2.88624	1.78169	1.56889	1.89666	1.43019	1.52306	1.72524
Ccdc80	6.39182	6.66025	6.74326	6.86703	6.68497	6.90013	4.00791	4.31794	3.78757	3.03348	2.76092	2.54746	2.9996	3.49931	3.21254	3.22423
Esco2	2.94834	2.89212	2.62921	2.52674	2.11791	3.11869	1.6567	1.21675	0.98333	1.29069	1.05755	0.98333	1.33831	0.98333	1.2191	1.09014
Trim63	4.88148	5.16122	5.40447	5.35814	4.90592	4.53857	1.24427	0.98333	1.21107	1.15691	3.3389	3.29352	1.91436	1.666	1.89994	2.03701
Hmmr	3.47812	2.34368	2.89808	2.26792	2.24527	3.15477	1.46517	1.32067	1.69812	1.10941	1.05755	1.16797	1.08059	0.98333	1.19473	1.16536
Phf11d	5.99377	5.85663	5.92012	5.75569	5.79021	6.09375	1.82575	4.61737	1.49681	1.94662	2.86793	3.15466	2.06457	2.12752	1.85398	2.20091
Prc1	5.64748	4.79709	5.22404	5.29868	4.3309	5.42875	3.11112	3.18502	2.76436	3.31574	1.49161	1.38232	1.80476	1.43019	1.33514	1.69171
Has3	3.03953	3.74778	3.8819	3.883	4.5856	4.26086	1.46517	1.16184	1.77138	1.20289	1.59492	1.612	1.82361	1.96019	1.58062	1.5492
Lpl	12.0749	11.5911	11.6099	11.6252	12.8807	12.1029	8.39373	10.6719	9.84945	9.4633	4.25509	3.80157	4.66247	4.69507	4.98791	4.94684
Pgam2	5.3129	6.02836	6.35613	6.47266	5.68629	5.53181	3.35169	1.5518	2.30308	2.38594	1.38033	1.98423	3.27773	3.33799	2.93203	3.72871
Mxd3	3.69561	3.75783	3.64666	3.57463	2.54174	3.66888	1.82575	1.26965	0.98333	1.66386	0.98333	1.10901	1.48764	2.04628	1.26664	1.30496
Trdn	5.39117	5.82112	6.26735	6.36082	5.63837	5.51918	0.98333	1.41761	3.26055	2.79911	2.05967	2.40767	3.11124	3.03525	3.13139	3.57627
Knl1	2.32161	2.28929	2.49663	2.58479	1.75667	2.72966	1.24427	1.10476	2.03208	0.98333	0.98333	0.98333	1.01648	0.98333	1.01151	0.98333
Hspg2	10.5126	10.4117	10.5021	10.4978	10.5178	10.5477	8.75479	5.02373	7.92391	7.74348	5.00168	5.5618	6.55865	6.69244	5.88629	5.61574
Nid2	7.5478	6.91387	7.48651	7.41111	6.90203	7.31783	1.97705	2.11124	2.32758	1.68021	4.60986	4.78296	4.61456	4.56986	3.83801	4.55533
Ifit2	8.03763	7.93115	7.80218	7.79454	7.78575	8.23548	3.23641	3.5158	2.32758	2.41554	6.08402	5.45931	4.5678	4.54049	4.48622	4.57845
NA	4.13669	4.95393	4.58901	4.6668	4.59041	4.59656	0.98333	1.26965	0.98333	1.03509	2.38202	2.45579	2.17147	2.34694	1.85398	2.03701
Il27ra	4.53171	4.26723	4.42236	4.598	4.57594	4.6031	2.23904	2.69836	2.27816	1.89152	1.78169	2.0484	1.7066	1.14814	1.68929	1.62221
Fabp3	5.65038	6.09131	6.66497	6.75772	5.84453	5.6151	2.55992	1.26965	2.53113	1.91933	2.64534	2.54746	3.56224	3.46846	3.85754	3.79337
Ripk3	5.50114	5.33575	5.22054	5.12371	5.10209	5.01818	3.17513	4.19342	1.45295	2.47297	1.54419	1.73408	1.36429	1.666	1.37907	1.21341
Iqgap3	3.81399	3.26055	3.35909	3.02303	2.52175	3.83004	1.46517	2.05208	1.8411	1.26923	1.12814	1.27912	1.28488	1.43019	1.24307	1.06417
Plin5	3.3557	3.64323	4.10323	3.9727	3.43169	3.47322	1.82575	1.71327	2.14665	1.94662	1.64393	1.16797	1.36429	1.14814	1.24307	1.5492
Ckap2l	4.25558	3.66476	4.26482	4.1562	3.08184	4.36463	1.82575	1.99039	2.53113	2.46355	1.38033	1.43127	1.55689	1.55291	1.14471	1.25991
Ptger4	4.32248	5.03881	5.32361	5.5231	5.37981	5.70301	3.85998	2.13994	2.44419	3.24056	1.94702	1.88229	1.80476	1.666	2.12299	2.31542
Kif4	4.50635	3.89164	4.03316	3.48602	3.62677	4.12196	2.55992	2.13994	2.03208	2.57266	1.19544	1.22462	1.17171	1.14814	1.48336	1.25991
Cdca3	3.99805	3.38248	3.56624	3.63083	2.60009	3.74186	2.35411	1.32067	2.0905	1.93304	1.25974	1.22462	1.36429	0.98333	1.19473	1.47229
Alpk2	3.42499	3.39541	3.13953	3.5457	3.23087	3.17248	0.98333	0.98333	2.06159	0.98333	1.59492	1.10901	1.62296	1.29605	1.31267	1.77412
Alpk3	4.55043	4.26723	3.63093	3.25525	3.62209	3.22998	2.82225	1.16184	2.37536	1.9866	1.43704	1.22462	1.36429	1.43019	1.0929	1.23685
Col4a2	11.019	10.135	10.4071	10.408	10.8442	10.4823	7.43032	8.58784	7.878	7.71525	5.78135	5.81566	6.98646	6.91184	6.37193	6.51446
Ccna2	6.04968	5.48235	5.83115	5.98317	4.69898	6.04572	3.40605	3.41374	3.20874	4.27393	2.13016	2.10984	2.03252	2.27745	2.02961	1.65738
Lamb1	8.26298	7.99095	8.14071	8.13408	7.87979	7.91184	4.20475	4.75822	4.69461	4.64471	5.06152	5.18738	4.74639	4.93963	4.55006	5.10486
Kif20b	3.79318	3.30235	3.18332	3.57463	2.60959	3.63096	0.98333	1.7877	1.45295	1.13335	1.59492	1.33164	1.78565	1.29605	1.50335	1.14072
Cox7a1	5.78561	6.42824	7.06924	6.92155	6.19783	5.53066	2.82225	1.95852	3.31057	2.06339	3.93895	3.49117	3.24314	3.07675	3.74875	4.23866
Slc25a30	3.68435	3.32956	3.49273	3.21905	3.58885	4.63538	0.98333	2.16808	0.98333	1.20289	2.05967	2.45579	1.28488	1.14814	1.06627	1.18958
Pxdn	9.34579	8.84978	9.00243	9.02931	9.13204	9.07558	5.39088	7.87621	5.86037	6.09402	4.07025	4.28707	5.26908	5.4856	4.78247	4.13332
Gvin1	3.29777	3.17313	2.7603	3.06442	2.99751	3.21866	0.98333	1.63479	0.98333	0.98333	1.32129	1.69453	1.41491	1.29605	1.24307	1.34865
Hspb6	5.57006	5.8378	6.3312	6.3101	6.02754	5.45189	1.82575	2.08197	2.50988	1.57922	3.13117	2.96819	3.48736	3.07675	3.58493	3.74106
Cd247	3.32702	3.26055	3.83233	3.883	4.12106	3.60076	1.46517	2.845	1.15741	1.57922	1.49161	1.33164	1.14197	1.666	1.06627	1.23685
Kdr	10.8054	11.1708	10.863	10.8251	10.9043	11.2304	7.63479	8.90946	7.92843	8.90066	7.14387	7.37821	6.95688	6.82622	6.03699	6.84653
Adamts9	7.10391	6.4609	6.66368	6.5512	6.81745	7.11987	3.85998	4.86521	4.15915	4.50944	2.90861	3.14001	3.42699	3.03525	3.49297	2.81321
Cdca8	4.47402	3.95416	4.15913	4.41809	3.19345	4.29629	2.46068	1.8926	2.42161	2.06339	1.49161	1.65385	1.57925	1.666	1.59931	1.6043
Cdca2	3.42499	2.99767	2.92413	2.74612	2.13116	2.95099	1.82575	1.59389	1.40771	1.15691	1.19544	1.10901	1.36429	1.14814	1.11904	1.09014
AW112010	8.41035	8.64098	8.32489	8.41176	8.39544	8.15148	5.09249	6.5729	4.11761	4.319	5.40853	5.8832	4.67291	4.58432	4.29598	5.00431
Sh3bgr	4.63475	4.98848	5.11896	5.36644	4.23594	3.93404	1.24427	1.26965	1.66004	1.20289	1.69132	1.91708	2.36409	2.70554	2.93938	2.84406
Aqp1	12.9379	12.6376	12.4672	12.4714	13.2354	12.7277	10.8018	10.9004	10.547	11.0729	3.06073	3.00099	2.94037	2.99252	3.58023	3.42634
Gimap4	9.04215	8.77629	8.82285	8.83221	8.65417	8.80982	6.48199	7.68011	5.12325	6.85631	3.30882	3.94332	2.63351	2.65163	2.66559	3.39543
Foxm1	3.88457	3.4949	3.71787	3.78735	2.89246	4.10361	1.6567	1.8926	1.58073	1.68021	1.69132	1.56889	1.31184	1.43019	1.5425	1.70857
1110002E22Rik	3.42499	3.71721	3.81851	3.92855	3.34902	3.2468	1.24427	1.04532	1.93975	1.33266	1.32129	1.56889	1.89666	1.55291	1.65397	1.74171
Gata6	4.9489	4.91853	5.27384	5.14316	5.3347	5.40772	2.23904	3.72913	3.43979	2.46355	2.16415	2.3579	1.62296	1.86863	1.68929	2.06347
Enpp6	5.08357	5.29146	5.7166	5.56697	6.13425	6.21761	1.6567	3.42544	2.88481	2.52819	1.98556	2.54746	3.27773	3.07675	2.86411	3.27606
Gm4070	3.47812	3.2175	2.8893	2.84445	3.04029	3.36445	0.98333	1.67456	0.98333	0.98333	2.05967	1.43127	1.36429	1.43019	1.06627	1.01078
Fam83d	3.4518	2.42161	2.7603	2.79612	2.29322	2.85191	0.98333	1.59389	0.98333	1.15691	1.25974	1.10901	1.31184	1.14814	1.52306	1.28261
Rrm2	4.9952	4.58203	4.51096	4.89043	4.18918	4.88311	2.9739	2.37536	3.11334	2.93474	1.54419	1.56889	1.72677	1.77087	1.88478	1.70857
Cysltr1	5.17087	4.1951	3.99271	3.99428	4.38722	3.99502	2.11398	1.46374	2.81722	2.47297	2.09535	2.19735	1.8606	1.666	1.35727	1.4919
Mgll	11.5615	11.6789	11.2463	11.2338	11.5671	11.5064	9.08662	8.04549	9.06026	8.98307	7.04699	7.73514	7.84942	7.68866	7.97145	7.81597
Tcim	9.49362	8.96623	8.84248	8.84117	9.0091	9.18948	6.5439	7.32151	6.30788	6.37263	6.3618	5.04523	3.85581	4.20838	3.92947	4.70988
Cd109	5.28708	4.7323	5.50856	5.4931	5.04896	5.48297	1.24427	1.5518	1.04372	1.45171	3.75043	3.34553	2.14173	2.20443	2.89469	2.69125
Ift122	7.60789	7.08528	7.10668	7.17169	6.22358	6.65662	2.55992	3.26536	0.98333	2.2057	4.59747	4.58084	4.60914	4.44863	4.34109	4.38746
Cdk1	6.06279	5.32227	5.78452	5.82958	4.72544	5.68462	4.29394	3.67133	3.14125	3.96591	1.54419	1.16797	1.89666	1.14814	1.42169	1.80581
Nusap1	4.49995	4.18023	4.69618	4.55508	3.61739	4.8687	3.2952	2.19567	2.48832	2.26109	1.90743	1.84664	1.62296	1.666	1.28984	1.51125
Ppp1r13l	5.49149	5.05927	4.76985	5.01178	5.33326	5.00835	1.46517	3.05545	0.98333	1.69637	2.82608	3.01712	2.29821	2.27745	2.70063	2.29323
Jph2	5.97078	6.43765	6.27749	6.23957	5.98164	5.4531	4.77901	3.32905	3.05585	4.0279	1.12814	1.10901	3.35753	3.30345	2.43534	1.69171
Dach1	7.82659	6.45319	6.97115	7.14058	6.4287	7.23213	3.93584	5.23798	3.34697	4.09039	4.43293	4.37728	3.93597	3.5591	3.23063	3.19462
Tspan6	7.61235	7.30338	7.58503	7.65755	7.20672	7.56241	3.55782	4.52792	2.79981	3.37217	5.03421	4.98502	4.60914	4.66817	4.34109	4.7613
Dsp	7.57168	7.7018	7.32808	7.44481	7.71021	7.57716	6.19605	4.17966	5.8812	5.7279	2.16415	2.30634	2.63351	2.47664	2.51624	1.85207
Ube2c	4.29313	3.56526	4.3633	4.56953	3.0473	4.32031	2.23904	3.34145	2.2007	1.77458	1.12814	1.52446	1.25741	1.55291	0.98333	1.11565
Fscn1	9.34289	9.24805	9.1687	9.11491	9.16715	9.02145	5.953	6.90197	4.96047	4.47237	5.09715	5.40826	6.42227	6.25527	6.4893	6.83746
Gas2	5.91407	5.75994	6.02413	5.92255	5.43028	5.83858	1.97705	1.67456	1.04372	1.52595	2.86793	2.84714	3.75627	3.89698	3.74875	3.23009
Chek2	5.97078	5.73217	5.54118	5.57415	5.96785	5.62692	2.82225	2.08197	4.62714	2.78406	3.42554	3.14001	2.55671	1.96019	2.53578	2.4317
Myocd	2.26227	2.37013	2.21654	2.0379	1.9782	2.04964	0.98333	1.04532	1.66004	1.35319	0.98333	0.98333	1.14197	1.14814	1.03915	0.98333
Stk10	6.89634	7.06822	6.59913	6.58003	7.04413	6.70913	4.73721	4.2733	3.74273	4.74136	3.55929	4.08008	3.45144	3.23177	3.18805	3.37445
Trip13	3.25274	2.81721	3.17612	3.85968	2.36229	3.2468	0.98333	1.67456	0.98333	1.18008	1.25974	1.52446	1.55689	1.77087	1.40054	1.47229
Neil3	3.10855	2.54281	2.24438	2.46626	1.70442	2.4681	1.24427	1.26965	1.97119	0.98333	1.05755	0.98333	1.11161	1.43019	1.06627	0.98333
Slc2a9	4.00712	3.97154	4.6553	4.84365	3.80688	4.29359	1.97705	3.17118	2.14665	2.43494	1.38033	2.07945	1.66539	1.29605	1.7407	1.5678
Des	7.39732	7.70765	8.32632	8.46392	7.61849	7.53729	5.7578	5.06172	5.57081	5.7377	3.38287	2.71498	5.22011	5.314	4.09335	2.84406
Elf4	5.73466	5.6908	5.46191	5.36644	5.56823	5.87958	3.97233	3.99566	3.63889	3.13185	2.5457	2.86506	1.78565	1.666	1.7407	1.82139
C5ar2	2.94834	2.37013	2.70127	3.68491	2.63773	3.34376	1.82575	1.26965	0.98333	1.37344	1.69132	1.52446	1.20085	1.29605	1.2191	1.30496
Prr11	3.66156	3.08008	3.37806	3.5457	2.46006	3.89902	0.98333	1.7877	2.39867	1.18008	1.49161	1.65385	1.38982	1.29605	1.4631	1.6399
Sgk1	9.86701	9.25605	8.5564	8.58442	9.23997	9.72543	6.74181	6.2532	5.01428	5.50744	7.66611	6.981	5.37033	5.39005	5.95864	5.50909
Tspan12	8.08014	7.93392	7.7265	7.6777	7.86002	8.00022	3.2952	5.03905	3.02622	3.00131	5.60386	6.12742	5.17126	4.99481	4.80075	4.87209
Slc25a13	4.19339	4.13468	4.53932	4.54049	4.1539	3.92363	1.97705	1.21675	0.98333	1.54392	1.82483	2.01667	2.35115	2.47664	2.16122	2.14005
Rassf10	4.45427	5.12674	5.37959	5.39105	5.47645	4.94795	2.90007	2.35102	2.83441	2.28267	3.14825	2.40767	2.37691	2.34694	2.40379	2.91115
Mylip	7.63665	7.52699	7.35665	7.30933	8.09841	7.7099	3.65079	6.0752	3.12736	4.0965	5.16167	5.2637	4.2879	4.56986	4.02242	4.52233
Mgat4a	7.35	6.72059	6.65723	6.64968	6.81334	7.18565	4.20475	3.39004	3.51638	3.0207	3.78361	4.20499	4.52524	4.7345	4.2494	3.97508
Cldn15	5.14235	5.41091	5.41828	5.51566	5.6818	5.23029	4.2351	2.51335	4.25806	4.0247	1.05755	1.04754	1.31184	0.98333	1.24307	1.11565
Phospho1	2.03293	2.49554	2.21654	2.58479	2.04974	2.68923	0.98333	1.16184	0.98333	0.98333	1.54419	1.56889	1.08059	0.98333	1.16993	1.01078
Haspin	3.03953	2.14359	2.65017	2.74612	2.48092	3.01127	0.98333	1.7877	1.45295	1.83424	1.38033	1.27912	1.20085	0.98333	1.03915	1.09014
Fam111a	6.09928	6.18739	6.13143	6.17961	6.03902	6.15664	3.45843	4.64265	4.16596	3.46944	3.02417	3.2668	2.91422	2.85615	2.45599	2.92565
Nuf2	3.9234	3.50687	3.80455	4.09759	3.12223	3.96486	0.98333	1.95852	2.14665	1.47063	1.69132	1.22462	2.09593	1.77087	2.09692	1.62221
Vegfc	6.46931	6.54601	6.53579	6.63944	6.13589	6.52669	1.24427	3.73854	0.98333	1.59655	4.65239	4.59702	4.02011	4.11186	3.34579	4.09215
C1qtnf6	5.53601	5.05927	4.89584	4.74526	5.20595	4.45422	3.04414	1.75096	1.45295	1.57922	3.3389	3.14001	2.38962	2.70554	1.97341	2.4816
Cd274	6.35323	6.73338	6.29755	6.3483	6.43673	7.01295	4.04264	4.73959	3.88982	3.85867	4.06126	4.08008	3.31818	3.4047	2.83286	3.36384
Cdca5	3.14186	2.47131	3.14692	2.79612	2.29322	3.3333	2.35411	1.5518	1.97119	1.77458	0.98333	1.22462	1.14197	0.98333	1.16993	1.01078
Sncaip	6.03425	5.76243	6.60451	6.62568	6.47622	6.6005	3.45843	3.37805	2.67172	2.84333	4.94414	4.16213	3.25012	3.03525	3.47284	3.80518
Tpx2	5.30557	4.61558	4.9748	5.04318	3.98168	5.07263	3.11112	3.30391	2.37536	3.27864	1.94702	1.69453	2.21497	2.12752	2.12299	2.28201
Cyyr1	7.50764	7.73906	7.74427	7.77285	7.6702	8.7147	4.73721	6.28245	4.704	4.35254	5.7141	6.50295	3.84662	4.0297	3.1378	3.30407
Lmcd1	6.25771	6.73846	6.65399	6.61527	6.57833	6.35253	3.04414	4.17966	2.27816	2.7916	4.60368	4.59702	3.62807	3.37173	3.8102	3.89631
Wnt9b	3.4518	3.35626	3.11713	3.21905	2.54174	3.74186	0.98333	1.41761	1.45295	0.98333	1.12814	1.73408	1.66539	1.86863	1.61776	1.88211
Nsl1	3.29777	3.0312	3.48108	3.29057	2.55163	3.3899	0.98333	1.41761	0.98333	1.61367	1.69132	1.47862	1.72677	1.86863	1.24307	1.53035
Ppm1j	4.84655	4.92746	4.62121	4.74526	4.04607	3.89902	2.11398	3.19872	2.0905	1.10941	1.64393	2.1396	2.51091	2.20443	2.46621	2.12757
Rassf9	6.52402	7.06215	6.82387	6.77653	7.52179	7.7157	2.23904	4.9728	3.86493	3.21835	4.9875	5.55077	4.01602	4.29884	3.74875	4.32047
C1qtnf1	5.44887	5.65898	5.24141	5.33296	5.28368	5.79161	2.23904	2.16808	0.98333	1.9055	4.37606	4.04119	2.40222	2.04628	2.53578	3.01648
Bub1b	4.93471	4.02245	4.19879	4.24888	3.55483	4.50402	3.04414	2.05208	2.03208	2.64939	2.26158	1.88229	2.22918	1.86863	1.58062	1.4524
Asb11	3.88457	4.00568	4.19523	4.26672	3.50987	3.3333	1.97705	1.10476	1.77138	1.93304	1.12814	1.38232	2.25719	2.34694	2.11001	2.08945
Ggta1	7.94219	8.02516	7.86572	7.89117	8.32888	8.61098	4.64981	7.35096	4.68042	4.93601	4.65837	4.98502	4.8163	4.93963	4.69177	4.52709
P2ry10b	3.26791	3.11177	2.92413	3.3916	3.05427	3.40994	1.46517	1.04532	1.73521	1.18008	1.94702	2.19735	1.22941	1.14814	1.33514	1.4919
Spc25	4.01613	3.57666	3.76186	3.92855	2.76221	3.84484	2.82225	1.92594	1.90761	2.17142	1.73721	1.38232	1.74667	1.14814	1.59931	1.32697
Nrp2	9.62236	9.18055	9.07397	9.13265	9.2436	9.31245	6.9619	5.61027	7.43706	7.04288	6.08845	6.30702	5.97545	5.97703	6.00317	6.30935
Rnf130	8.26345	8.26512	8.29277	8.40875	8.21581	8.14757	4.37793	6.07706	4.02328	3.85867	6.39796	6.39448	5.36551	5.12909	5.31632	5.50064
Kifc1	3.673	3.04768	3.14692	3.02303	2.61903	3.05648	2.23904	1.95852	1.361	2.21695	1.12814	1.04754	1.43956	1.14814	1.16993	1.37
Asah2	6.11404	5.87059	6.10605	6.04133	6.2259	6.55678	3.35169	3.63146	4.4432	3.80377	3.50726	3.87419	3.13407	3.30345	3.23661	3.33698
Kif23	4.53798	3.98015	3.89513	3.76242	3.48428	4.40264	2.23904	2.53512	1.77138	1.33266	2.13016	2.16877	1.74667	2.12752	1.75744	1.53035
Stx2	6.889	7.25276	6.65464	6.66321	6.98376	7.15814	3.8205	5.04285	3.62907	4.06572	4.57237	4.70548	4.06834	4.2812	3.91089	3.74515
Tmem173	5.87003	5.80425	5.78807	5.87099	5.89105	5.71615	4.20475	3.45999	3.84809	2.62426	3.36836	3.19774	2.64416	3.19455	2.83286	3.08265
Aspm	3.32702	2.67596	2.94124	3.10466	2.18299	3.32277	1.82575	1.75096	1.49681	1.24746	1.43704	1.27912	1.48764	1.29605	1.52306	1.11565
H2-Q5	3.95185	3.0312	2.8077	2.79612	3.16151	3.29609	0.98333	2.87944	0.98333	1.39341	1.64393	1.77259	1.17171	0.98333	1.16993	1.21341
Mastl	2.87099	2.67596	3.25348	2.98041	2.10453	3.56546	0.98333	1.50844	0.98333	1.31182	1.32129	1.56889	1.20085	2.04628	1.28984	1.5678
Asf1b	3.80362	3.40823	3.47522	3.5457	2.36229	3.56546	1.97705	1.5518	2.72801	2.54614	1.54419	1.22462	1.43956	1.14814	1.26664	1.39105
Ska3	2.40629	2.44667	2.62921	2.52674	1.94856	2.6048	0.98333	1.36996	0.98333	1.22535	1.19544	1.16797	1.33831	1.55291	1.26664	1.11565
Ltbp4	10.2788	10.3385	10.2295	10.2474	10.4661	10.4877	6.8922	8.34413	6.8725	6.93462	7.2216	7.84423	8.00593	8.04946	7.21465	7.66998
Prkd1	5.45551	5.54463	4.76024	4.94686	6.29672	6.00923	2.82225	4.2926	1.62093	2.65767	2.76092	3.31976	3.10354	2.99252	3.45243	2.5393
NA	6.52717	6.40124	6.34572	6.3691	6.43339	6.96338	2.35411	5.38007	2.57272	2.58139	4.85329	5.2191	2.20061	2.90306	2.74327	2.94
Rbm20	5.05325	5.03881	4.92838	4.95788	4.36776	4.39512	1.24427	1.04532	1.45295	2.06339	2.66921	3.28022	2.8786	2.99252	2.55505	2.58568
Oasl1	4.70886	4.79221	4.73103	4.81967	4.52162	4.90975	1.24427	2.92961	1.69812	1.84877	2.96755	2.90027	2.33809	2.59562	2.23479	2.4816
Kctd12b	7.57092	7.62221	7.65766	7.57224	7.73863	7.88591	2.90007	4.73959	2.55208	3.80377	5.59454	5.81104	5.32308	5.44655	5.00203	5.47623
Asb2	5.08784	5.49743	5.45299	5.42323	5.00103	4.66278	2.65276	1.46374	2.00195	1.68021	2.82608	2.40767	3.51662	3.67173	3.00393	2.92565
Mki67	6.69506	6.05916	6.48201	6.49175	5.17269	6.52612	4.77901	3.88981	4.54072	5.7484	1.43704	1.10901	2.04864	1.55291	1.63598	2.07652
Ecscr	8.45576	8.40957	8.25393	8.14136	8.09799	7.98568	5.86841	6.76361	5.73548	5.49363	5.29805	6.16228	4.50786	4.31628	4.6498	4.74504
Casp1	4.97223	4.7272	4.08025	4.26672	4.87474	4.16682	1.46517	2.82746	3.16862	1.33266	1.94702	2.27986	2.36409	2.34694	2.24669	2.67418
Naip2	4.30052	4.00568	3.30725	3.3587	3.3937	3.66054	0.98333	2.02156	1.15741	1.29069	2.05967	2.33235	1.57925	2.34694	1.33514	1.80581
Casq2	5.75364	6.07934	6.56022	6.35249	5.93894	5.83395	2.11398	1.63479	4.06759	3.25701	1.73721	2.19735	4.61456	4.65453	4.25531	3.17048
Pole	3.20626	2.77825	3.17612	3.29057	2.33963	2.95099	1.24427	1.63479	0.98333	1.18008	1.38033	1.38232	1.82361	1.666	1.42169	1.41179
Bace2	6.29889	6.43608	7.0298	7.08886	6.58738	6.65976	3.40605	4.90337	3.66796	3.46944	5.00168	4.41428	3.76117	3.4047	3.42126	4.29278
Rrad	4.06904	4.1951	5.39364	5.53787	3.98168	4.35174	3.35169	1.95852	3.23488	2.90722	1.49161	1.77259	2.77585	2.47664	2.4457	1.82139
Ifi203	7.29184	7.38589	7.28602	7.21828	7.3436	7.60921	5.30766	5.95721	5.4449	5.72987	3.63396	3.96842	3.65464	3.72491	2.88711	3.24172
Fli1	7.90992	7.84125	8.08696	8.09467	8.11539	8.37153	4.75826	6.36073	3.39413	2.86495	6.0065	6.8633	4.72147	4.70833	4.77838	5.15185
Cav1	11.8379	11.5502	12.0472	12.057	12.0509	12.3917	8.56626	11.8148	8.08615	8.4607	8.79376	9.25723	7.25957	7.42102	6.99672	7.44476
Tgtp2	4.95828	4.17274	3.9886	3.92855	4.25119	4.71205	0.98333	3.19872	0.98333	0.98333	3.18183	3.2668	1.80476	1.55291	1.4631	1.65738
Jam3	6.83656	7.17427	7.08952	7.06611	6.72595	6.77774	2.9739	3.59047	3.33494	2.58139	4.96357	4.61832	4.9316	4.91696	4.76809	4.44393
Fhl2	7.22444	7.50702	7.74214	7.69921	7.16906	6.77339	2.11398	1.46374	1.45295	1.26923	6.62546	5.4052	4.75624	4.93963	4.94106	4.93435
Pcdh19	6.85048	6.35399	6.66304	6.77028	6.70948	6.8908	3.11112	1.95852	3.04111	3.66692	3.78361	4.28041	5.08794	4.84672	4.53072	4.41853
Klhl4	6.93486	6.26519	6.40318	6.40982	6.12268	6.70305	2.35411	1.82352	0.98333	1.43254	5.32084	5.57548	4.01602	3.89698	3.28936	3.50083
Dysf	8.3749	8.51258	8.31447	8.30248	8.2357	8.2048	6.80386	7.06329	6.32927	6.35237	3.94874	4.48555	4.55375	4.62685	3.88827	3.57167
Ndc80	3.97975	3.50687	3.80922	4.13692	3.19976	3.81508	1.6567	2.67894	2.2528	2.60727	1.49161	1.69453	1.48764	1.55291	1.70663	1.72524
Prelid2	3.19043	3.36943	3.39678	3.65812	3.10889	3.13685	1.24427	0.98333	0.98333	0.98333	2.09535	2.383	1.41491	1.666	1.63598	1.6399
Thrsp	7.96621	6.81385	6.56367	6.66993	7.74538	6.3085	4.91643	4.43255	5.16463	3.81122	4.31684	3.52539	4.59549	4.62685	5.03329	4.6102
Cdc6	3.51672	3.34297	3.39678	3.45523	3.15504	3.52927	2.65276	2.13994	0.98333	1.41311	1.59492	1.33164	1.36429	1.666	1.56169	1.67464
Mcm5	6.11614	5.64551	5.88519	5.78694	5.1088	5.67326	4.2351	3.37805	3.92235	3.88359	3.46698	2.96819	2.88758	2.70554	2.47636	2.85167
Slc15a3	4.82107	4.34262	4.71122	4.70657	4.02137	4.33086	3.11112	3.61111	2.2528	3.03983	1.43704	1.52446	1.84222	2.34694	1.61776	1.51125
Ska1	2.74659	2.28929	2.66054	2.58479	1.8558	2.64763	1.6567	1.26965	2.06159	1.9866	0.98333	1.04754	1.22941	0.98333	1.11904	1.03772
Snai2	5.37375	5.53005	5.56483	5.55975	5.53869	5.39143	3.17513	3.19872	3.63889	3.79254	3.04257	3.67517	2.74651	2.70554	2.27021	2.88172
Mis18bp1	2.68013	2.01542	2.50816	2.40313	1.80709	2.82231	1.46517	1.26965	1.80666	1.66386	1.12814	1.04754	1.28488	1.14814	1.11904	1.11565
Il4i1	3.00374	2.31674	2.63973	2.84445	2.28138	2.22957	1.24427	1.46374	1.40771	1.06029	1.12814	0.98333	1.62296	1.55291	1.37907	1.21341
Gbp9	7.302	7.18641	7.0536	7.15262	6.94957	7.3664	4.26482	5.37706	4.49819	4.58518	5.34326	5.47399	4.0404	4.11186	3.23063	3.52484
Arhgap18	8.14267	7.99414	8.14371	8.21902	7.67953	8.03874	5.21934	4.54947	5.43648	5.78948	6.28664	5.60778	5.07226	5.3398	5.19408	5.42868
Pdgfd	7.39127	7.15348	6.65269	6.72583	7.56119	7.75541	1.6567	4.77661	2.57272	1.31182	5.82716	5.84982	4.72147	4.74741	4.61808	4.8284
Plk4	3.9234	3.31602	3.49273	3.3587	3.2185	3.9917	1.6567	2.27544	1.21107	1.54392	1.98556	2.30634	1.62296	1.55291	1.59931	1.5678
Pdlim3	4.88148	4.8914	5.0712	5.02232	4.89041	4.83944	2.9739	4.07952	2.48832	2.58139	1.54419	1.43127	2.7855	2.94848	2.41438	1.94038
Tmem140	7.86699	8.0005	7.58944	7.60592	7.74807	7.92408	4.32248	6.15996	5.34944	5.31147	5.94673	5.74481	4.16761	4.56986	4.10648	4.92716
Sgo1	2.56205	2.54281	2.78893	2.52674	1.82351	2.59608	1.6567	1.16184	0.98333	1.72817	1.25974	1.27912	1.14197	1.666	1.11904	0.98333
Oas2	6.05625	6.19665	5.12833	4.7705	6.02044	5.75486	4.32248	5.02758	2.9335	2.82874	2.51968	3.15466	2.68597	2.47664	2.12299	2.42151
Rgcc	9.37125	9.01863	8.98526	8.9383	9.17297	8.58105	7.04989	6.60026	6.94653	7.14837	7.07295	5.98508	5.69097	5.65957	5.48535	5.16871
Car8	8.67071	8.77227	8.78308	8.77023	8.60573	8.46235	4.26482	5.20441	4.85066	4.12961	5.57887	6.20338	6.81451	6.76723	6.88548	6.90028
Lsmem1	1.76011	2.14359	2.32479	2.40313	2.04974	1.99761	0.98333	1.04532	0.98333	0.98333	1.25974	1.16797	1.11161	1.29605	1.33514	1.32697
Vim	11.2688	11.1136	11.2732	11.2988	11.3254	11.3707	7.33547	9.59696	7.20388	7.6263	9.24615	9.48335	8.51218	8.5247	8.38123	8.73391
NA	3.19043	3.24634	3.64666	3.73704	3.38266	3.45886	0.98333	1.92594	0.98333	0.98333	1.78169	1.98423	1.82361	2.12752	1.79034	1.74171
Hoxd8	3.61488	3.28855	4.05297	4.30176	3.4687	3.34896	3.45843	2.63929	2.55208	1.87741	1.19544	1.43127	1.04889	0.98333	1.11904	1.11565
Pabpc1l	2.37861	1.98151	2.53094	2.6406	2.52175	2.34858	1.6567	1.10476	1.49681	0.98333	1.25974	1.22462	1.25741	1.29605	1.28984	1.25991
Tpm1	10.091	10.4365	11.1092	11.1215	10.0026	10.2353	6.23411	7.19817	5.90378	5.4005	8.88577	8.84	8.32326	8.30656	8.24803	8.40667
Duox2	2.40629	2.51937	2.77945	3.21905	2.63773	2.62208	2.23904	1.7877	2.35167	1.37344	0.98333	1.16797	1.01648	1.14814	1.0929	1.03772
Prickle3	4.78989	5.09538	4.85355	4.85549	4.8826	5.04085	2.90007	3.42544	2.57272	2.91415	2.84715	3.00099	2.43936	2.12752	2.48643	2.23623
Plxnd1	9.38262	9.41294	9.49332	9.45842	9.27118	9.53167	7.88255	7.09935	7.92793	8.01541	5.46417	5.95819	5.8546	5.71319	5.34705	5.30385
Jam2	9.34177	9.57979	9.77038	9.76225	9.86944	10.0546	5.68273	7.1247	5.59119	5.93622	7.87553	8.22787	7.33871	7.31011	6.97765	7.37253
E2f8	2.26227	2.2613	2.32479	2.46626	2.11791	2.94414	2.11398	1.50844	1.97119	1.26923	1.05755	1.10901	1.01648	0.98333	1.0929	1.03772
Esr1	7.8701	6.96247	7.61665	7.61813	7.1419	6.91423	2.11398	7.05295	2.65245	2.73795	5.85864	4.85201	4.01192	3.94259	3.74035	4.04646
Clca3a1	3.03953	2.69701	3.25348	3.18192	3.56951	3.19576	1.6567	3.00954	0.98333	0.98333	1.05755	1.10901	1.62296	1.666	1.35727	1.11565
Prrg3	7.19796	6.80176	6.79357	6.74505	6.9519	7.31584	4.93503	4.75358	4.49278	4.21344	4.72821	4.46806	4.20763	4.2812	4.13237	4.77136
Etfdh	6.58584	6.67358	6.52235	6.3691	6.38995	6.40839	2.11398	3.2123	2.11885	1.35319	5.29805	5.28716	4.08797	4.11186	3.91462	4.05637
Dchs1	6.71595	6.60147	6.52661	6.44158	6.50895	6.62803	3.50898	4.66257	3.85653	4.50715	4.12305	4.17656	4.25007	4.09175	3.75292	4.13955
Pola2	6.32269	6.40444	6.37985	6.28405	6.11269	6.02312	4.10969	4.60713	5.20155	4.43673	3.16514	3.3327	3.26399	2.99252	3.10548	2.77369
Mall	6.90969	6.87976	6.94648	7.00364	6.78375	7.20442	3.60505	3.91494	3.71515	2.76885	5.22344	6.09171	3.95747	3.82573	4.16096	4.58303
Spdl1	2.72478	2.65461	2.817	2.79612	2.22068	2.89521	1.46517	1.75096	0.98333	1.61367	1.32129	1.27912	1.57925	0.98333	1.40054	1.51125
Lims2	9.78274	9.7403	9.26292	9.25948	9.79632	9.32273	3.45843	7.90104	3.92235	4.04061	7.90095	8.18078	6.86828	6.94023	6.57737	7.21733
Cip2a	4.24028	3.70687	4.01711	4.21252	3.0473	4.08815	2.74	1.26965	2.37536	1.31182	2.09535	1.81009	2.46361	2.47664	1.58062	1.74171
Comp	4.74182	5.00545	5.6814	5.69109	6.11853	6.52152	2.90007	1.21675	2.46642	2.30392	4.18231	3.95174	3.35104	3.23177	3.55173	4.34764
Klk8	6.22116	6.64949	6.10605	6.1749	5.45947	6.16551	4.64981	4.27976	4.76357	4.74525	2.62107	3.31976	2.9996	2.53736	2.74327	3.31512
Kif22	4.71993	4.18768	4.6052	4.7705	3.57437	4.44696	3.2952	2.91308	3.04111	2.74574	1.78169	1.69453	2.21497	2.20443	1.94447	2.01005
Aurka	4.27072	3.36943	3.80922	3.83597	3.075	3.89547	2.11398	2.61905	2.2528	2.95503	1.49161	1.88229	1.38982	1.29605	1.65397	1.82139
Nck1	8.39057	8.6294	8.16912	8.25968	8.44072	8.4916	5.7578	7.65548	4.77252	5.97897	5.88181	6.34104	4.86944	4.82253	4.80277	4.91268
Mybl2	2.76809	2.14359	2.33777	2.40313	1.49483	2.42935	1.24427	1.10476	0.98333	1.52595	1.38033	1.10901	1.48764	1.29605	1.26664	1.03772
Lancl3	3.02175	2.63293	2.36338	2.46626	2.36229	3.02434	0.98333	1.04532	0.98333	0.98333	1.54419	2.1396	1.28488	1.29605	1.37907	1.41179
Fhod3	5.17892	5.47628	5.36382	5.36644	5.395	4.78484	1.24427	1.36996	0.98333	0.98333	2.46618	3.11025	3.86038	3.91996	3.83012	3.69948
Plod1	8.64335	8.48902	8.20917	8.29053	8.84007	8.58188	6.45	6.83774	5.69604	5.95817	5.80848	5.87658	5.79256	5.8571	5.66353	6.03967
Actn2	6.76488	7.33141	7.75156	7.69757	6.56923	7.07742	3.35169	4.10158	2.46642	2.7916	4.63432	4.54236	5.7476	5.8148	6.2873	2.52032
Arhgap10	5.85504	6.1818	5.7228	5.85339	5.75211	5.70808	2.74	3.56953	1.87474	2.34551	4.2232	4.36473	3.65464	3.69857	3.18805	3.42634
Kif14	2.20038	1.75942	2.24438	2.74612	1.70442	2.39959	1.24427	1.50844	1.04372	1.91933	1.19544	0.98333	1.14197	1.14814	1.14471	1.06417
Cavin2	11.3259	11.2799	10.7893	10.8122	11.2089	11.3775	9.05932	9.67379	9.56601	9.77455	8.50512	8.38756	6.45211	6.32582	6.24712	6.66514
Myl1	1.52787	1.83731	2.00506	1.76411	2.03572	2.02386	0.98333	1.04532	0.98333	0.98333	0.98333	0.98333	1.36429	1.14814	1.35727	1.09014
Rad51	3.47812	3.27462	3.63619	3.78735	2.56145	3.47322	2.35411	1.85847	2.37536	2.26109	1.64393	1.47862	1.55689	1.29605	1.77399	1.5492
Mtfr2	2.10226	1.71884	2.21654	2.11871	1.53527	2.2957	0.98333	1.04532	1.53938	1.18008	1.12814	0.98333	1.28488	1.29605	1.26664	0.98333
Gngt2	7.87506	7.98454	7.61032	7.56505	7.74484	7.2416	5.30766	6.89673	6.15029	5.98062	3.90919	4.5754	3.46951	3.72491	3.64912	4.19745
Oip5	2.83071	2.49554	2.40096	2.26792	1.96346	2.57848	0.98333	1.21675	0.98333	1.03509	1.32129	1.52446	1.48764	1.29605	1.50335	1.32697
Il16	6.14106	6.17432	5.97514	5.78694	6.35295	5.94114	3.40605	2.51335	3.5992	2.76885	3.49396	4.10293	4.22547	4.11186	3.97669	4.07924
Fignl1	3.61488	2.87376	3.51003	3.3916	2.77071	3.31747	0.98333	2.39929	0.98333	1.37344	1.78169	1.69453	1.60127	1.666	1.85398	1.75801
Fbn1	6.45943	5.9905	6.42539	6.44942	5.966	6.16329	5.36367	3.45999	3.09918	3.94238	3.96811	4.0093	3.69103	3.07675	3.07909	4.16421
Smtnl2	5.85504	6.01585	6.33848	6.13659	6.30989	6.40777	4.93503	4.20704	5.29147	5.33231	2.19737	1.56889	1.91436	1.77087	2.07037	1.91154
Rftn1	7.93864	8.30935	7.77292	7.7365	8.35859	7.94763	7.04989	6.09915	6.82597	6.71915	3.19833	4.02533	3.64937	3.61652	3.45243	3.62149
S100a10	9.62255	9.4475	9.12866	9.06671	9.4778	9.15381	6.02424	7.33398	5.28523	5.28633	7.90724	7.31685	6.22719	6.24621	7.09176	7.57403
4930578C19Rik	4.84655	5.02223	5.33012	5.25465	4.97186	5.68975	2.35411	2.75511	1.93975	2.75349	3.24672	3.80157	3.20769	2.99252	2.87181	3.19462
Prkch	8.51018	8.1506	8.08239	8.04513	8.38752	8.32099	4.67216	6.20309	5.78718	5.23607	6.3926	6.71302	5.68325	5.67316	5.3064	5.57838
Idh2	8.39748	8.52367	8.85466	8.82244	8.24678	7.98004	5.50735	6.93612	4.5302	4.95964	6.92093	6.38675	5.95742	5.90973	6.13551	5.75314
Cenpa	5.0088	4.54188	4.88924	5.04318	4.27527	4.64809	3.69513	2.94596	3.35891	3.61685	2.22983	2.40767	2.01622	1.96019	2.19847	2.07652
Exo1	2.92939	2.34368	2.56444	2.19524	1.72205	2.6974	1.82575	1.36996	1.87474	1.45171	1.12814	1.22462	1.17171	1.29605	1.2191	1.11565
Plscr2	6.80702	7.05198	6.52235	6.58359	7.01761	6.96465	2.23904	2.71753	1.73521	2.30392	6.41041	5.76643	3.89199	3.80118	3.94416	4.34495
Fut4	2.89072	2.99767	3.39057	2.74612	3.15504	2.87372	1.24427	2.13994	0.98333	1.33266	2.02309	1.52446	1.57925	1.43019	1.4631	1.4919
Ndel1	7.857	7.66356	7.31132	7.25896	7.75451	7.71671	3.17513	4.90337	2.61314	2.2057	5.86124	6.10874	5.52665	5.3818	5.68556	5.85131
E2f7	3.96121	3.8167	3.74735	3.78735	3.7986	4.30968	3.17513	2.37536	2.00195	3.33651	1.19544	2.19735	1.41491	1.96019	1.24307	1.28261
Pirt	1.80239	1.63409	1.90398	1.95228	1.55508	1.76842	0.98333	0.98333	0.98333	0.98333	1.05755	0.98333	1.04889	1.43019	1.19473	1.11565
Sh2b3	7.44063	7.80839	7.74974	7.77285	7.6049	7.96127	3.55782	6.28567	4.39765	4.38032	5.77587	6.1659	5.34771	5.39005	4.95564	5.14413
Cda	3.1253	3.47067	3.65705	3.603	2.96827	3.40496	1.46517	1.71327	1.8411	1.26923	1.25974	1.56889	1.68614	2.41325	2.11001	1.8969
St8sia6	5.57617	5.45173	5.8929	5.86515	6.18914	6.46696	0.98333	1.8926	1.04372	1.52595	4.46055	5.15496	4.02419	3.91996	3.50789	4.09536
Bves	2.37861	2.89212	3.06345	3.06442	3.01906	2.5873	0.98333	0.98333	0.98333	1.13335	1.98556	1.65385	1.4638	1.77087	1.72377	1.47229
Exoc6	6.88409	6.73846	6.70308	6.68991	6.92123	6.82981	4.14208	5.04285	3.16862	3.83331	5.14475	5.16946	4.31146	4.15124	4.15466	4.35301
Sapcd2	2.63405	2.67596	2.7699	2.84445	1.87168	2.48709	1.24427	1.21675	0.98333	1.29069	1.19544	1.22462	1.66539	1.77087	1.42169	1.4524
Atp8b1	5.72371	5.02223	5.40139	5.68446	5.60194	5.89122	4.60404	4.42674	3.22187	4.31639	2.57126	3.22576	2.14173	2.12752	2.49644	2.06347
Rps6ka3	8.18123	8.20211	7.95159	8.00848	7.99754	8.2524	3.89841	6.09915	2.85141	3.66692	6.54066	7.02353	5.80328	5.97703	5.51025	5.44261
Tgtp1	4.18543	3.20287	3.03186	3.02303	3.44767	3.63948	0.98333	1.63479	1.77138	1.00944	2.90861	2.5912	1.55689	1.29605	1.4631	1.5678
Casp7	6.50495	6.39964	6.59035	6.56569	6.49812	6.60919	3.04414	5.75178	1.8411	2.48232	4.811	5.10303	3.62807	4.00841	3.28936	4.03647
Myl7	2.72478	3.95416	4.72116	4.63967	5.40185	5.9557	3.8205	3.71965	4.60225	3.26244	0.98333	1.04754	0.98333	1.14814	0.98333	0.98333
NA	3.47812	3.15804	3.42137	3.3916	3.28524	3.53384	1.24427	1.46374	0.98333	1.18008	2.86793	2.40767	1.31184	1.43019	1.52306	1.74171
Polh	4.21703	4.10349	3.9637	4.41809	3.92953	4.63112	2.11398	2.87944	0.98333	1.59655	3.06073	3.35825	1.7066	1.77087	1.95901	1.74171
Nts	5.10484	4.91853	5.50569	5.40723	4.94959	5.10373	4.29394	3.68112	3.23488	3.29465	1.73721	1.69453	2.72661	2.65163	3.09234	3.02996
Car7	5.50114	5.61819	5.49124	5.24568	5.39638	5.44219	1.24427	1.5518	0.98333	1.13335	3.23077	3.44424	4.26048	4.09175	3.96953	3.80518
Arsa	7.30292	6.90824	6.61321	6.57288	7.19848	6.88276	3.77991	5.57129	4.13853	3.59546	4.88422	4.84751	4.51077	4.7345	4.56915	4.55066
Iigp1	8.54445	7.9144	7.20025	7.17642	7.61966	7.9566	6.27119	6.20139	6.01354	6.15011	5.57887	5.50004	4.2845	4.31628	3.69763	4.20043
Ddias	2.74659	2.67596	2.8536	3.02303	2.04974	2.84457	1.46517	1.71327	1.45295	1.35319	1.49161	1.65385	1.20085	1.43019	1.28984	1.62221
Uhrf1	4.29313	3.64323	4.2984	4.31896	3.03325	4.19597	3.2952	2.77354	2.46642	2.91415	1.98556	2.0484	1.62296	1.43019	1.48336	1.72524
Piwil2	2.70262	2.83631	2.55336	2.40313	2.71898	2.35892	1.46517	1.71327	0.98333	1.18008	1.05755	1.33164	1.7066	1.55291	1.52306	1.16536
Cdc45	4.06035	3.76781	3.89073	3.95079	2.8288	3.42479	1.6567	2.05208	0.98333	2.07581	2.13016	2.54746	1.8606	2.20443	1.97341	1.65738
Trim21	5.34544	5.41727	5.08858	5.28998	5.3532	5.36857	2.11398	3.88134	3.69646	3.21835	3.41145	3.76385	2.86955	2.85615	2.53578	2.80539
Diaph3	3.22192	2.61092	3.27388	2.9365	2.19566	3.24121	1.24427	1.36996	0.98333	0.98333	1.59492	1.33164	1.66539	1.666	2.05691	1.99639
Prag1	6.25581	6.17056	5.97618	6.00459	6.2359	6.33756	2.23904	3.08526	2.94937	2.61579	4.32438	4.73502	4.44532	4.31628	4.11624	4.08248
Cytl1	7.85449	8.14869	8.53209	8.53742	7.85679	8.31552	6.36337	7.36698	5.73319	6.79477	5.47098	5.95401	3.83737	3.7762	3.84585	5.45889
Tmem71	5.73739	5.73217	5.45597	5.46246	5.7734	5.97348	4.14208	4.31794	4.6516	4.71383	2.62107	3.00099	2.27099	2.41325	1.70663	2.22455
Inka1	6.34253	6.60147	6.64292	6.65984	6.3186	6.03688	3.8205	4.50604	3.61918	3.62953	4.27078	4.8156	4.23606	4.3335	4.09335	4.12078
F2r	7.65118	7.39799	7.5107	7.54508	7.43194	8.07312	6.51328	5.68762	6.78564	6.57196	3.14825	3.28022	3.27773	3.37173	3.24257	3.30407
Dtx3l	6.63199	6.68679	6.27158	6.07717	6.77533	6.74901	3.69513	4.45557	2.90122	4.18221	5.10154	5.46226	3.9403	3.80118	3.48796	4.20934
NA	3.0571	3.17313	3.50428	3.603	3.14853	3.59202	0.98333	2.27544	0.98333	1.18008	2.32306	2.54746	1.60127	1.666	1.52306	1.43224
Map3k3	6.30809	6.35399	6.08312	5.95042	6.20959	6.92603	3.69513	5.00436	3.47311	3.81122	4.8893	5.53406	2.97451	2.70554	2.9969	2.74945
Racgap1	5.53601	5.04702	5.23968	5.3414	4.49367	5.30978	3.97233	3.37805	3.55838	3.53382	2.13016	2.47926	3.1491	3.07675	2.74327	3.04331
Klhl24	7.08155	6.92617	6.77759	6.80428	7.19217	7.42513	3.85998	4.56542	3.35891	3.9956	5.49455	5.51147	5.15274	5.24285	4.52584	4.48121
Tnfrsf23	3.29777	2.99767	3.23279	3.5457	3.45295	3.1607	1.97705	2.02156	1.73521	1.87741	1.69132	2.19735	1.53417	1.43019	1.75744	1.5678
Rmi2	1.8834	1.67709	2.35063	1.76411	1.68658	1.98431	1.46517	1.26965	0.98333	1.15691	1.12814	0.98333	1.14197	1.14814	1.11904	1.21341
Samd9l	7.45312	7.32382	6.85466	6.9074	7.20789	7.40436	2.23904	4.11609	2.39867	1.72817	6.04578	5.89415	5.30977	5.27886	4.89264	5.41975
Dsc2	2.65727	2.96334	2.817	2.52674	3.18076	2.88092	0.98333	1.32067	0.98333	0.98333	2.16415	1.65385	1.82361	1.55291	1.5425	1.30496
Cav2	10.2509	10.1929	10.1112	10.1444	10.3189	10.7406	6.25648	9.92735	6.64165	7.06795	8.28527	8.80153	6.85917	6.89454	6.87401	7.30136
Pole2	3.20626	2.89212	3.1905	3.29057	3.06121	3.18997	1.24427	2.35102	1.31274	1.39341	2.19737	1.84664	1.43956	1.43019	1.56169	1.4919
Sparc	12.6152	12.0893	12.1049	12.0971	12.2958	11.9766	7.11661	9.7155	7.28821	6.50529	10.8485	10.6237	10.0451	10.0472	10.2117	10.6204
NA	2.92939	3.45839	2.98314	3.02303	2.96086	4.09745	1.46517	1.63479	1.8411	1.45171	2.43867	2.84714	1.41491	0.98333	1.37907	1.18958
Emp1	9.2569	8.93667	9.05654	9.0175	9.08034	9.43908	5.88764	9.39006	5.06616	5.87806	6.73129	6.82717	4.36393	4.41666	4.4429	5.39782
Aoc3	4.87654	4.23161	4.75299	4.6533	5.93516	5.14317	2.23904	2.02156	2.81722	1.9734	3.11388	2.91755	3.78542	3.5591	3.12496	2.96828
Slfn3	2.48627	2.89212	3.15428	2.74612	2.5809	3.90256	2.11398	1.32067	1.2628	1.43254	1.78169	2.5912	1.31184	1.14814	1.33514	1.43224
Zfp36l2	6.70345	6.63184	6.52164	6.43371	6.78427	6.84046	2.23904	5.03141	3.32281	3.50658	4.91947	5.65749	4.17129	3.87362	4.62037	4.20638
Plk1	3.54189	2.79786	3.07124	3.21905	2.24527	3.38484	2.23904	2.08197	1.53938	2.1481	1.05755	1.27912	1.7066	1.77087	1.70663	1.23685
Ccne2	4.06035	3.71721	3.45153	3.65812	3.075	4.20173	1.24427	1.75096	1.73521	2.33523	1.90743	2.3579	2.41471	2.20443	2.16122	1.82139
NA	5.74011	5.96687	6.00596	5.89414	5.91327	5.75094	1.82575	4.81715	0.98333	2.01266	4.49435	4.58084	3.53961	3.7762	3.66251	3.17655
Cnr2	2.81013	3.78757	3.38433	3.3916	2.6924	3.72995	1.46517	3.63146	1.58073	2.51002	1.05755	0.98333	1.11161	1.14814	0.98333	1.11565
Itpripl1	7.0479	6.7321	6.80004	6.71936	7.21569	6.99772	4.04264	6.14056	5.75367	5.38936	4.29399	4.33288	3.68073	3.30345	3.30082	3.47643
Litaf	7.44397	7.07225	7.34465	7.37043	7.11255	7.31883	4.79946	6.31899	4.66127	3.6751	4.91947	5.20509	4.91191	4.81028	4.70693	4.99746
NA	5.81171	5.35904	5.27046	5.38289	5.53745	5.48534	1.6567	3.45999	1.97119	1.74381	4.31684	4.3959	2.9317	3.37173	3.37862	3.50567
2019-09-10	6.61282	6.14015	6.31488	6.45332	6.2923	6.62856	3.73814	5.33113	4.60225	4.00537	4.8893	4.70049	3.53961	3.5881	3.18805	2.89651
NA	4.68645	4.39507	4.21997	4.23081	4.35086	4.38756	1.6567	2.27544	0.98333	0.98333	3.78361	3.86531	1.74667	1.77087	2.05691	2.03701
Ifih1	6.82891	6.69466	6.63769	6.56569	6.74008	6.88231	4.37793	5.17698	3.35891	4.10863	5.42615	5.17666	4.20044	4.15124	3.61738	4.01968
Brca1	3.14186	2.65461	3.294	2.9365	2.44952	3.38484	1.46517	2.05208	1.10169	2.01266	1.25974	1.52446	1.99973	1.29605	1.75744	1.5678
Ptp4a3	7.93567	8.23081	8.47137	8.40371	8.3877	8.39999	5.48227	7.13543	5.47811	5.7484	5.6822	6.30374	6.07814	6.07757	5.69753	5.94857
Gas6	9.63631	9.75323	9.72395	9.71145	9.64363	9.75671	8.15868	7.43296	7.78708	7.9698	6.89965	7.37899	7.01083	7.00347	7.0138	6.96047
Wasf2	8.52486	8.43915	8.52022	8.5096	8.83019	8.95692	4.37793	7.09203	5.11624	5.36681	7.14918	7.4045	6.2802	6.23709	5.7371	6.27721
Ifngr1	9.12517	8.78584	8.63259	8.67657	9.03148	8.73347	7.12473	6.92997	7.85922	7.71078	5.74812	5.89415	5.2076	5.0992	5.15829	5.22106
Cdkn3	3.07446	2.51937	3.33987	3.32504	1.9928	2.94414	2.11398	1.85847	0.98333	1.68021	1.25974	1.47862	1.4638	1.77087	1.56169	1.65738
Depdc1b	2.81013	2.89212	2.51959	2.52674	2.62841	2.94414	1.24427	1.50844	3.01117	1.89152	1.25974	1.22462	1.20085	1.14814	1.19473	1.39105
Galnt7	5.15056	4.91853	5.0358	5.11388	5.41275	5.36985	2.35411	2.89636	2.76436	2.77648	3.21464	3.5698	3.26399	3.69857	3.31785	2.52984
Plcd1	5.26835	5.34578	4.9748	4.95788	5.40322	5.26647	2.11398	2.9939	1.66004	2.22812	4.19058	3.60223	3.1265	2.94848	3.38939	3.21836
Usp25	7.35534	7.1966	6.85861	6.8255	7.31158	7.48894	4.40488	5.86354	3.65834	3.56056	6.03664	6.11624	4.32476	4.09175	4.27579	4.23576
Igf2r	7.40848	7.28959	7.43271	7.39091	7.61819	7.70129	5.93463	6.03566	4.78584	5.72692	5.42264	5.08784	4.73149	4.58432	4.80277	4.57385
Ctla2b	4.29313	3.86399	3.6725	3.99428	3.69083	4.04394	1.24427	2.92961	0.98333	0.98333	3.19833	3.04883	1.53417	1.666	1.56169	2.0503
NA	3.15823	2.61092	2.8893	2.33711	2.73643	3.98504	1.24427	1.50844	1.40771	1.29069	2.64534	2.65442	1.08059	0.98333	1.11904	1.11565
Tcf19	4.35124	4.23161	4.53651	4.78295	3.78608	4.46862	1.24427	3.08526	1.69812	1.06029	2.90861	2.5912	2.82346	2.65163	2.4249	2.72479
Cfh	8.0753	8.31063	8.5733	8.55296	8.68609	8.76712	3.85998	4.60713	3.63889	2.51002	7.63992	7.85268	6.08987	6.10792	5.91734	6.39583
Smpdl3a	7.5314	7.55968	7.50998	7.44088	7.55813	7.61651	4.10969	6.29527	3.65834	3.71532	5.99475	6.19099	5.17126	5.10923	4.92448	5.2559
Mndal	6.55217	6.72572	6.36487	6.43765	6.74655	6.4337	5.45674	5.87851	4.84643	5.49478	2.80468	2.65442	2.90539	2.65163	2.2585	2.22455
Ctnnbip1	8.23913	8.44421	7.96576	7.96543	8.2195	8.0833	6.32156	4.10158	6.70379	6.42632	5.85084	6.11624	5.73645	5.43063	5.75492	5.74192
Eng	10.8576	10.7968	10.4433	10.4501	11.0526	10.9217	6.69345	10.4068	6.96714	6.70374	8.4025	9.20847	8.15458	8.0125	7.8263	8.11431
Xdh	9.52966	9.51775	8.87539	8.84637	10.2077	9.82285	7.17255	8.38665	6.62938	7.54495	7.42805	7.57553	6.28616	6.29538	7.06175	7.36091
Rnf213	7.42295	7.30253	7.00714	7.19284	7.1606	7.34476	5.9621	5.48445	5.09499	5.41278	4.44681	4.84299	5.12641	5.04794	4.30454	3.88152
Uba7	6.43948	6.1948	5.82541	5.67781	5.88714	5.79447	4.48282	5.12768	3.48405	3.34166	3.86853	4.16213	3.72653	3.37173	3.03858	2.59477
Gimap6	9.51265	9.38687	9.41961	9.4777	9.45196	9.52573	6.81395	8.79346	6.44575	7.64828	7.07964	6.98408	6.56426	6.47685	6.56613	6.92077
Nxpe4	6.74333	6.58745	6.60853	6.79509	6.71224	7.07546	1.6567	4.05713	1.93975	2.1363	5.55024	6.21914	4.79497	4.92834	3.83407	4.28156
NA	3.10855	2.99767	3.0077	2.89121	2.82065	3.0047	1.24427	1.8926	1.21107	1.22535	1.98556	2.30634	1.33831	1.55291	1.40054	1.41179
NA	4.84655	4.69618	4.14074	4.24888	4.37613	3.92014	1.6567	2.37536	1.8411	0.98333	3.68168	3.35825	2.31163	2.12752	2.5646	2.2707
Magix	5.80653	5.98837	5.95949	6.11213	5.94458	5.63865	2.82225	4.00349	3.83106	4.33715	3.76157	4.27371	3.68589	4.07137	3.30652	3.69102
NA	2.91018	2.71775	2.63973	2.69432	2.61903	3.49215	1.82575	2.13994	0.98333	1.52595	1.69132	2.383	1.28488	0.98333	1.19473	1.14072
NA	2.58645	2.37013	2.40096	2.52674	2.63773	2.4195	0.98333	1.5518	0.98333	0.98333	1.59492	1.95105	1.17171	1.29605	1.37907	1.4524
Spaar	5.3877	5.39168	5.47224	5.51566	5.60906	5.74109	2.55992	2.02156	2.8682	3.21274	3.65802	4.26023	3.71648	3.89698	3.19421	3.76544
Itga6	9.75273	9.41473	9.61107	9.6418	9.41366	9.58043	6.8682	8.51748	7.37377	7.80044	6.59619	7.1523	7.23161	7.2904	6.7462	6.95606
Emcn	9.56692	9.55623	9.75444	9.83132	9.42405	9.39278	8.03908	7.75042	7.52442	8.09302	7.09624	7.61514	6.85631	6.76723	6.33617	6.77429
Tinagl1	9.84221	9.46102	9.12913	9.15976	9.97675	9.66892	4.29394	9.53467	5.28523	4.776	6.9662	7.77954	6.71767	6.66888	7.18596	6.99267
Apol10b	6.65236	6.76362	6.29173	6.35249	6.87274	6.33167	5.49486	4.5707	6.07994	5.19968	3.6095	3.94332	2.51091	1.86863	2.46621	2.84406
Phf11c	1.5774	1.79889	1.9554	2.40313	1.66851	1.97088	1.24427	1.04532	1.31274	1.03509	1.05755	1.38232	1.14197	1.14814	1.16993	1.28261
Gpr160	4.86661	4.36251	4.58357	4.56953	5.02962	4.81146	0.98333	1.71327	1.2628	1.00944	3.6095	3.91779	3.1491	3.15634	2.49644	2.94712
Coq8a	5.65903	6.21501	6.2339	6.22595	5.57552	5.49709	2.46068	2.63929	0.98333	1.69637	4.10567	3.9601	4.60914	4.41666	4.64081	4.50312
Ecm2	5.91888	5.90717	6.2648	6.23504	6.27	6.46636	3.2952	2.86232	2.65245	2.50084	5.11464	5.00133	4.38312	4.2812	3.98382	4.03313
Lamc1	8.60131	8.2067	8.6102	8.6213	8.65818	8.75113	5.7261	7.21006	5.6311	6.38391	6.80047	6.58771	6.32803	6.18585	6.08833	6.32105
NA	6.75684	6.58745	7.21878	7.22742	7.12709	7.79905	3.69513	5.35886	3.31057	2.77648	6.49631	6.39448	4.33465	4.15124	4.33831	4.39789
Chst7	5.14235	5.33239	5.39364	5.25465	5.65681	5.42998	3.50898	5.1169	3.84809	3.85867	2.05967	2.19735	2.35115	2.70554	2.53578	2.5673
Myl12a	9.99912	9.64791	9.51419	9.52016	9.72175	9.45876	4.91643	7.57173	5.21474	5.31147	8.80492	8.70343	6.99792	6.94584	7.10244	7.75386
Cenph	2.23165	1.98151	2.57544	2.6406	1.55508	2.33815	1.24427	1.32067	1.87474	1.93304	1.12814	0.98333	1.22941	1.43019	1.14471	1.21341
Ceacam1	5.18692	5.41409	5.22753	5.20924	5.02253	5.81341	1.46517	3.64153	2.37536	1.74381	4.19058	4.93498	3.06445	2.20443	2.51624	3.13972
NA	2.63405	2.47131	2.70127	2.74612	2.59053	2.57848	0.98333	1.75096	1.87474	0.98333	1.64393	2.0484	1.22941	1.29605	1.24307	1.28261
Tnfaip8l1	6.30442	5.63737	5.74975	5.92255	5.70192	5.27878	4.91643	3.59047	4.08924	2.15981	4.14023	3.79223	3.5453	2.85615	3.43693	3.69948
Sox7	8.10937	8.38059	8.22497	8.29706	8.33247	8.29243	5.24939	8.50444	5.89561	6.00029	4.99697	6.13483	4.16391	3.89698	3.75292	4.30115
NA	3.43846	3.53051	3.19763	3.3587	3.01191	3.7847	1.82575	2.446	1.58073	1.06029	2.29265	2.45579	1.64433	1.666	1.24307	1.92603
Slc39a7	3.54189	3.232	2.95814	2.9365	3.30876	3.72995	1.24427	1.92594	1.2628	1.41311	2.49318	2.86506	1.57925	1.43019	1.42169	1.28261
Itga9	6.99305	6.90711	6.64031	6.49932	7.31775	7.36896	5.73675	6.27439	5.33138	5.74549	3.7392	3.97669	3.25012	3.30345	3.34024	3.73695
Crkl	5.09637	5.01386	5.45448	5.4855	5.52621	6.10224	2.35411	4.37939	2.32758	2.30392	4.46738	4.71044	2.71656	2.80768	2.80092	2.69971
Scarb1	7.76312	7.80355	7.78244	7.76973	8.02775	7.78832	4.87848	7.21765	4.79025	4.59168	5.6822	6.32979	5.40204	5.34829	4.94289	5.1626
Fmnl1	6.97237	7.02102	6.45992	6.32295	7.15534	7.15592	3.93584	4.45557	4.11057	3.69132	4.42595	4.9136	5.15647	5.33125	5.3512	5.06285
Ifi44	6.84922	6.66826	6.57536	6.55484	6.23667	6.91423	3.97233	5.77025	3.47311	5.50744	4.77296	4.76875	4.11117	3.9868	3.14418	3.72871
Ehd2	10.8143	10.5532	10.4386	10.4237	11.1957	10.7768	8.69054	10.0733	8.90359	9.20346	7.96623	8.51402	7.01032	6.95143	7.15036	7.53054
Wwtr1	8.46895	8.23576	8.59745	8.59505	8.67213	9.08866	5.14138	6.39536	4.83793	4.94111	7.60786	7.81513	6.149	6.13764	5.93308	6.46383
Apold1	7.83107	7.07426	7.22621	7.27448	7.64789	7.94441	2.65276	3.47133	2.83441	4.06572	6.7732	5.82026	5.72897	5.67316	5.76944	5.82062
Rarres1	3.59096	3.31602	3.28062	3.25525	3.81511	3.60512	1.46517	2.32626	0.98333	1.78973	1.98556	1.95105	1.93184	2.41325	2.13584	1.65738
Troap	2.29225	1.98151	2.14452	2.19524	1.51519	2.3692	1.82575	1.71327	0.98333	1.64732	0.98333	1.04754	1.17171	1.29605	0.98333	0.98333
Galnt15	8.38623	8.53613	8.80836	8.7881	9.09584	8.82634	6.47565	5.95115	7.04214	7.16043	6.74399	6.43105	6.59545	6.53011	6.31653	6.53233
Pcdh12	7.65983	8.20119	7.89317	7.83994	8.02109	7.98902	7.12067	6.41163	6.9485	7.53487	1.59492	1.612	2.72661	2.90306	2.01577	2.73306
Ccng1	7.49239	7.50479	7.53555	7.47965	7.46895	7.41618	4.69417	4.81715	4.11057	3.50658	6.25149	5.95401	5.56077	5.55332	5.59301	5.45265
Ifi207	3.71787	3.73766	3.89951	3.48602	3.8556	3.68953	2.23904	3.35376	2.44419	3.51116	1.12814	1.27912	1.53417	1.55291	1.24307	1.25991
Il15	4.73637	5.12286	4.92623	4.75793	4.86882	4.99514	3.17513	2.96212	2.2007	3.10182	3.54646	3.47958	2.8328	2.70554	2.68322	2.89651
Unc45bos	3.26791	3.57666	3.45749	3.18192	3.38819	3.33854	1.97705	2.32626	2.11885	1.93304	1.82483	1.98423	1.7066	2.04628	1.31267	1.88211
Filip1	6.397	6.22952	6.63965	6.68991	6.00432	6.39651	3.35169	3.34145	2.91745	3.88712	4.78393	4.90496	4.90971	4.82253	4.09335	4.60346
Tgfb1	6.63492	6.86007	7.0741	7.05589	6.80354	7.20622	3.50898	6.7048	3.80512	3.88359	4.62824	5.37737	4.17497	4.22693	4.15466	4.67384
Ccnd1	10.3336	10.4587	10.0387	10.0038	9.41442	10.0574	8.51462	9.767	8.60793	8.559	6.49465	7.12187	5.91958	5.71319	5.18328	6.29197
Arhgap8	3.10855	2.67596	2.73108	2.69432	3.075	2.59608	1.82575	1.95852	1.45295	1.59655	1.59492	2.16877	1.33831	1.14814	1.37907	1.30496
Vsir	8.49455	8.67087	8.41107	8.40371	8.95108	8.34819	6.92515	7.90471	7.15596	7.22175	5.19083	5.92225	5.1786	4.95084	4.66541	4.91631
NA	4.46089	4.18023	4.73839	4.94686	4.58319	5.21043	0.98333	3.68112	1.31274	1.56168	3.93895	4.41428	1.96619	1.86863	2.00179	2.0503
Sema4c	6.66244	7.02934	6.67331	6.59423	6.93405	7.01008	4.87848	5.5844	5.0698	5.72987	4.14023	4.5754	4.40206	4.18958	3.98382	4.05966
NA	3.02175	2.63293	2.36338	3.21905	2.57121	2.65605	1.46517	1.75096	0.98333	0.98333	2.13016	2.0484	1.33831	1.29605	1.44254	1.43224
Aunip	2.26227	1.63409	2.05306	1.86126	1.72205	1.85869	0.98333	1.36996	0.98333	0.98333	1.32129	0.98333	1.25741	1.43019	1.16993	1.11565
Akr1c14	8.07422	7.79869	7.77292	7.80068	7.92306	8.0965	3.85998	4.81715	3.96201	4.70786	6.84961	7.0629	5.9849	5.93251	5.17084	6.03048
Gusb	6.78082	6.46397	6.58219	6.5512	6.35789	6.51749	4.40488	4.11609	4.71332	3.94576	5.09715	4.72524	4.34448	4.43274	4.41416	4.44896
Zfp367	6.37965	6.36882	6.61588	6.64286	6.09505	6.84507	4.40488	4.86521	4.36843	4.07193	4.89943	5.30697	4.13401	4.20838	3.79407	3.77347
NA	3.36983	3.12736	3.0867	3.57463	3.09543	3.73393	0.98333	1.92594	0.98333	1.52595	2.69269	2.67489	1.33831	1.96019	1.65397	1.51125
Nck2	6.78214	6.50184	6.33767	6.41383	6.42803	6.48302	4.26482	4.47259	4.39765	4.21904	4.68203	4.86988	4.19683	4.24525	4.47108	4.55299
Sln	1.47657	2.44667	2.49663	2.33711	3.75217	3.6813	2.35411	2.02156	1.53938	2.2057	0.98333	1.16797	1.36429	1.77087	1.5425	1.4524
Adam17	7.32484	7.27129	6.78886	6.6866	7.37737	7.22649	5.30766	5.28048	5.08783	5.35921	5.08832	5.28716	4.88299	5.05834	4.51604	4.76331
Dhrs3	7.83425	8.30935	8.07514	8.03995	8.28786	7.73867	6.18054	6.53964	5.82208	5.58545	6.47108	6.05898	5.42228	5.42261	5.83201	5.89984
Rps27l	6.67245	6.7822	6.64749	6.70635	5.99891	6.09684	1.82575	5.19076	1.53938	1.84877	5.25532	5.51715	4.32145	4.29884	4.60889	4.75116
Dennd5a	8.89942	8.83502	8.5243	8.58264	8.76274	9.0613	5.64931	7.51741	5.34644	5.60592	7.38546	7.62701	6.43841	6.38071	6.52396	6.33129
Cxcl10	4.05162	4.04724	4.57812	4.46522	3.23087	4.43234	1.46517	3.07043	2.00195	1.96007	3.13117	2.77311	2.32492	2.65163	2.23479	2.08945
NA	2.94834	2.37013	2.68105	2.0379	2.98296	3.46366	0.98333	1.5518	0.98333	1.08506	2.69269	2.19735	1.22941	0.98333	1.48336	1.21341
Cyb5r1	7.11023	7.41079	7.08664	7.06866	7.14231	7.05014	5.76822	4.68708	5.25681	5.41156	5.2194	5.28716	4.73398	4.69507	4.77838	4.91268
Ppic	8.24776	7.59514	7.75308	7.72041	7.59626	7.66161	6.32861	6.24827	5.76044	6.07946	6.04122	5.79944	4.89641	4.83468	4.8208	5.33405
Arrdc4	6.24243	6.28791	6.2138	6.2168	5.8891	6.43553	5.59185	5.21118	4.92479	5.30753	2.22983	2.75399	2.62279	2.12752	2.81698	2.75757
H2-T24	5.99605	6.11104	6.25543	6.19367	5.80579	6.78399	3.17513	5.27402	2.91745	4.52988	4.66432	4.88314	3.76117	4.22693	2.80092	3.78941
Sh2d3c	8.31547	7.7698	7.56689	7.56865	8.1726	7.72123	5.34987	7.68011	5.30078	5.41033	5.87926	5.881	5.04037	4.77289	4.80075	4.8284
Myo1c	9.09333	9.17047	8.58014	8.61347	9.19562	9.11236	6.60908	8.22111	6.46796	6.29581	7.32664	7.59782	6.06136	6.18585	6.0058	6.09282
Ktn1	7.30384	7.51889	7.68996	7.65755	7.58456	7.61705	4.53253	5.69972	3.67752	4.26583	5.66152	5.75686	6.08695	6.07757	5.5588	5.7942
Wdsub1	5.26458	5.63464	5.29229	5.36644	5.63488	5.40523	2.65276	4.17274	2.11885	1.87741	4.38329	4.14755	3.28455	3.5591	3.3732	3.13349
Tpst1	6.40388	6.78466	6.75661	6.86703	6.63118	7.1111	3.65079	3.81171	3.33494	3.36713	5.68513	5.44746	4.80686	4.82253	4.93188	5.17782
Kitl	10.0075	10.0943	10.2033	10.2859	9.93261	10.5494	7.02839	9.60503	7.19559	8.02304	8.32338	9.00042	7.52195	7.50513	6.77165	7.05127
Map3k14	4.48704	4.4206	4.13331	4.21252	4.40097	3.72995	3.60505	2.67894	3.47311	2.814	2.57126	2.16877	2.15668	1.96019	2.21068	1.74171
Ptbp3	8.41589	8.3477	8.38727	8.49453	8.57424	8.9634	6.67143	6.84864	7.5363	7.17457	6.45572	6.70309	5.62935	5.4701	4.95564	5.12855
Pi16	5.07927	5.84253	6.01305	5.95593	4.52162	5.65448	4.26482	2.87944	4.68989	4.1503	3.77263	3.31976	3.71648	3.19455	2.80897	3.34239
Tlr4	4.76338	4.48252	4.31162	4.73248	4.48596	5.13717	3.04414	3.40194	3.39413	3.46944	3.19833	3.01712	2.35115	2.04628	2.27021	2.60382
Galnt10	6.51451	6.559	6.3417	6.42579	6.72977	6.5846	4.00791	4.85659	5.14753	4.85372	4.63432	4.56447	4.24308	4.68168	3.99445	4.13332
Deup1	2.70262	2.2613	2.73108	2.40313	2.33963	1.82922	0.98333	1.41761	0.98333	1.4893	1.25974	1.612	1.41491	1.55291	1.58062	1.41179
Klhl6	5.2908	6.1948	5.75822	5.91125	5.77235	6.37564	3.45843	3.45999	3.43979	3.65457	4.07025	4.71539	4.0404	4.29884	3.4779	4.22408
Lipa	7.48592	6.76984	6.73286	6.70635	7.11255	6.97478	3.45843	5.05421	3.92235	3.08963	5.64356	5.77119	5.18226	5.22451	4.98614	5.03638
Cdc42ep3	6.94078	6.63321	6.42387	6.27966	6.73954	6.68876	5.07582	3.76641	4.15915	4.17934	5.12762	5.2086	4.53385	4.62685	4.26412	4.6609
Micall2	5.68468	5.45482	5.33498	5.38289	5.41411	4.8058	4.6271	2.63929	4.62714	3.52932	2.98667	2.90027	3.51081	3.26805	2.66559	2.94
Mcm6	7.18104	6.86705	6.9908	7.01688	6.26249	6.8515	5.7261	6.06775	5.20486	5.57128	4.52083	4.62359	3.85122	3.80118	2.80897	3.57627
Ets2	9.21178	9.52145	9.61048	9.68681	10.0335	9.90927	7.6433	9.00858	8.36182	8.51283	6.44711	7.02453	6.42998	6.43358	6.42135	6.56742
Alox12	4.6808	5.18749	5.37802	5.53051	5.08856	4.781	3.17513	2.77354	2.50988	1.78973	4.09689	4.14021	3.38317	3.46846	2.62056	2.91842
Shroom4	8.39317	8.18638	8.31303	8.35346	8.7538	8.52859	5.10897	7.14076	5.55014	6.40127	6.38721	6.96239	6.47465	6.39718	6.00405	6.36426
Lmnb1	6.48399	5.84253	6.30748	6.16542	5.71298	6.42941	3.50898	6.05274	3.79637	3.63792	3.86853	3.78283	3.75627	3.64439	3.66695	4.02978
Kif18a	2.89072	2.7382	2.4733	2.40313	2.2574	2.67273	0.98333	2.446	1.10169	0.98333	1.59492	1.56889	1.36429	1.55291	1.24307	1.28261
NA	2.65727	2.14359	2.05306	2.0379	2.11791	2.42935	1.97705	1.36996	1.69812	1.94662	1.12814	1.22462	1.25741	1.14814	1.03915	1.09014
Tmem123	8.1339	8.42463	8.35253	8.38953	8.28248	8.76396	4.64981	6.99228	5.08424	4.73355	7.09844	7.75511	6.13774	6.2325	5.49287	6.05624
Adm	5.67334	5.63737	5.33822	5.25465	5.85555	5.01818	2.55992	2.13994	1.69812	1.74381	4.91947	4.96438	2.85129	2.80768	3.92947	3.51528
Impa2	3.0571	3.11177	3.10958	3.02303	2.3846	2.98479	1.24427	1.46374	0.98333	1.26923	1.78169	1.38232	2.11136	2.34694	1.72377	1.5678
Smtn	7.95513	7.78032	7.80277	7.86505	8.1726	7.57217	5.36367	6.71556	5.47537	5.24159	6.05034	6.53549	5.77086	5.75214	5.16615	5.35696
Tlr2	4.61709	4.1951	4.03714	4.40204	4.42538	4.15499	3.77991	3.11448	3.56869	3.07116	2.05967	2.40767	2.14173	1.55291	1.77399	1.99639
Eva1a	5.34901	5.79208	5.58402	5.51566	5.23079	5.73216	2.65276	3.59047	1.90761	2.68223	2.46618	2.90027	4.49321	4.40041	4.80075	3.30961
Tmem154	4.46747	4.16521	4.58085	4.62592	4.1539	4.77135	2.65276	2.51335	2.2528	1.91933	3.54646	3.70534	2.15668	2.04628	2.34963	2.84406
NA	2.74659	2.91026	2.68105	2.58479	2.79589	3.56992	1.24427	1.16184	1.2628	1.15691	2.66921	2.67489	1.28488	1.29605	1.24307	1.03772
Ddx21	7.10602	6.84718	6.56712	6.69321	6.55517	6.45375	3.97233	5.44475	3.85653	3.72717	5.28266	5.57275	4.67031	4.47991	4.36313	4.50795
Ptprm	8.09403	8.30079	8.04826	8.08087	8.23819	8.41743	5.14138	7.41766	4.75456	5.54474	5.79498	6.57688	6.36871	6.40535	5.98641	5.97581
Ankrd37	5.91648	6.35895	5.44402	5.3414	6.28268	5.69793	3.85998	3.88981	4.21274	3.51116	3.64604	4.79236	3.94891	3.94259	3.96232	3.51528
Lhx6	5.53601	5.92288	5.79162	5.92255	5.6372	6.37245	2.74	4.58643	3.28578	3.71532	3.89914	4.51423	3.55097	3.67173	3.99445	4.54363
Tie1	10.365	10.3248	10.0669	10.0884	10.5368	10.2402	7.78848	10.4354	7.29211	7.84893	7.30776	7.87718	7.40672	7.47634	7.04097	7.37352
Ttf2	4.39334	3.91877	4.00902	4.13692	3.811	3.95124	2.11398	2.51335	1.62093	1.22535	2.82608	2.88277	2.56793	2.65163	2.09692	2.33727
Rps6ka2	5.96846	6.00112	5.93194	5.89414	5.82733	6.28766	4.07655	5.01601	4.08924	4.46531	3.19833	3.78283	3.94891	4.0297	3.75292	3.87406
Adgrg1	9.29117	8.80323	8.66593	8.6824	9.38525	8.97984	6.16487	6.71199	7.25267	6.27981	6.88061	7.17404	7.23028	7.20875	7.14759	7.20364
Cdc42ep1	8.45369	8.72726	8.42443	8.43955	8.74291	8.45695	6.90169	8.0216	6.74302	6.49954	5.78135	6.76646	5.68969	5.4856	5.34013	5.68661
Ackr3	8.0215	7.53578	7.55617	7.53959	7.72859	7.52614	4.71585	6.95138	4.67087	4.72372	6.22355	5.98303	5.53526	5.43063	5.49162	4.97499
Smc2	5.28336	4.97562	5.00155	4.99046	4.95891	5.39897	3.04414	4.06463	2.53113	2.5372	3.18183	3.66497	3.55097	3.03525	3.38401	2.84406
Tedc1	3.03953	2.91026	2.84454	2.84445	2.36229	2.89521	1.97705	1.41761	2.2007	2.08811	1.69132	1.27912	1.5111	1.666	1.61776	1.41179
Kif15	3.23741	2.7382	2.8077	2.84445	2.30496	3.18997	2.9739	1.41761	2.0905	3.04615	0.98333	0.98333	1.14197	0.98333	1.01151	1.06417
Lpar4	4.74182	4.50058	4.66563	4.4958	4.64687	5.0742	0.98333	1.5518	2.2007	2.21695	3.58461	3.2668	3.51662	3.33799	3.06571	3.03665
Ccm2l	6.83147	6.93727	6.85127	6.84345	6.93594	6.83352	3.17513	4.48382	3.64865	3.25155	5.57572	6.11811	5.30306	5.13892	4.54525	4.86835
Dsg2	3.81399	3.58797	3.99271	3.63083	3.67734	4.12499	2.35411	2.27544	2.55208	1.84877	2.94817	2.3579	1.76629	2.04628	2.16122	2.23623
Mrrf	5.15872	5.27756	5.39053	5.4469	5.17269	5.30711	2.23904	4.18656	2.2007	2.29333	4.06126	4.00121	3.20769	3.46846	3.07242	3.69526
Rad54l	3.20626	2.63293	3.02385	3.25525	2.09103	2.83718	2.46068	1.5518	1.80666	1.54392	1.59492	1.69453	1.48764	1.86863	1.67174	1.18958
NA	3.15823	2.79786	3.06345	2.52674	3.19976	3.31747	0.98333	2.16808	0.98333	0.98333	2.49318	2.67489	1.60127	1.14814	1.24307	1.39105
NA	4.75264	4.25309	4.02114	3.71121	4.12769	4.01806	0.98333	2.446	0.98333	1.31182	3.75043	3.37085	2.09593	2.04628	2.4249	2.75757
Vav3	5.23787	5.45482	5.28393	5.34979	5.29991	5.88586	3.35169	4.61737	4.26441	3.98906	2.78297	2.8106	3.28455	3.5591	3.51774	2.92565
1700025G04Rik	6.45778	6.82106	6.63637	6.7226	6.8051	6.97772	4.00791	3.58003	3.11334	2.814	4.54683	4.86988	5.52665	5.27886	5.59767	5.51029
9930111J21Rik2	2.40629	2.20365	1.86865	2.19524	2.00725	3.1666	0.98333	1.21675	1.40771	1.72817	1.73721	2.0484	1.20085	1.29605	1.11904	1.06417
Slc25a31	2.23165	2.28929	1.93847	1.54767	1.72205	2.6974	0.98333	1.50844	0.98333	0.98333	1.12814	1.73408	1.14197	1.29605	1.11904	1.62221
Ilk	8.03984	7.78585	7.46597	7.31363	7.56058	7.20622	2.90007	5.4704	3.89802	2.73795	6.63155	6.48277	5.78776	5.66638	5.87002	5.95034
Nyx	2.65727	2.71775	2.24438	2.46626	2.50148	2.76121	1.6567	2.51335	0.98333	2.23919	1.19544	1.22462	1.33831	0.98333	1.19473	1.39105
Cenpn	2.74659	2.08093	2.79834	3.10466	2.02155	2.71362	1.46517	1.63479	1.49681	1.06029	1.49161	1.65385	1.82361	1.55291	1.58062	1.41179
Ryr2	7.97951	7.58953	7.41866	7.27006	7.16181	6.81391	4.07655	1.85847	3.53753	2.33523	5.66746	6.18387	6.41762	6.2325	6.21416	5.35294
Ces2e	5.58225	5.8729	6.01204	5.89414	5.16627	5.36857	5.59185	3.44857	4.26441	5.62082	1.43704	1.52446	1.36429	1.43019	1.48336	1.5492
Cmpk2	7.54547	7.60631	7.54677	7.68932	7.49481	7.96615	5.36367	6.95138	4.93678	5.91996	5.79226	6.11249	5.14339	5.00559	4.97902	5.10486
NA	3.68435	3.53051	3.0077	3.06442	4.13758	3.72596	0.98333	2.16808	0.98333	1.39341	2.73853	2.90027	1.99973	1.86863	2.08371	2.07652
Mmrn2	9.12074	8.99306	9.15674	9.14537	9.34146	9.06614	8.55126	7.26971	8.01582	7.8289	5.73687	6.38053	6.32885	6.19058	5.68447	6.17551
