# Supplementary material for: Endothelial heterogeneity across distinct vascular beds during homeostasis and inflammation
Source: eLife journal article supplement (doi:10.7554/elife.51413), 2020-01-16
Supplement: supp [file elife-51413-supp-v1.zip › elife_poa_e51413_Supplementary_file_4.xlsx]

## Sheet: RibotagBrainECParenchymalDegs
Ribotag Brain EC Parenchymal Genes
Slc1a2
Gjb2
Snap25
Syt1
Dlgap1
Atp1a3
Kcnj10
Arpp21
Kif5a
Mobp
Unc80
Cplx1
Syn1
Chgb
Dner
Nefm
Iqsec3
Sv2b
Slc13a3
Scn8a
Mt3
Apod
Eno2
Map2
Kif1a
Bsn
3110035E14Rik
Kcnc1
Pacsin1
Gjb6
Jph4
Fut9
Gpr162
Dnajc6
Scn2b
Nap1l5
Fam163b
Scg3
Serpind1
Plppr4
Grin2a
Phyhipl
Map7d2
AI593442
Snph
Nsg2
Glrb
Nfasc
Gpr88
Gabrb3
Tmem229a
Fmod
Gpr158
Sprn
Cend1
Rasgrf1
Slc8a2
2019-09-03
Alx4
Nnat
Kcnh7
Cntn1
Aldoc
Bmp7
Vtn
Cspg5
Plp1
Elmod1
Slc6a20a
Rundc3a
Acsbg1
Golga7b
Ttyh1
Slc6a17
Wasf1
Sptbn4
Ttbk1
Slc6a7
Cadm2
Mbp
Slc4a10
Shank1
Adgrb2
Vsnl1
Nrip3
Sv2a
Aifm3
Slc1a3
Ppp1r1a
Clstn3
Pgbd5
Fam131b
Vat1l
Kcnma1
Bcan
Rims4
Pnmal2
Chst10
Ptn
Syt2
Kcnt1
Rapgefl1
Nos1
Tagln3
S100b
Stmn3
Slc24a2
Cacnb4
Ptprt
Sptbn2
Dock3
Scg5
Dgkb
Adcy1
Kcnk1
Panx2
Pcdh9
Grin2c
Chrm1
Stx1b
Nlgn3
Iglon5
Fbxl16
Abcg4
Sox10
1500015O10Rik
Aldh1a2
Cnksr2
Fmn2
Pianp
Mapk4
Pex5l
Psd
Acsl6
Caskin1
Cdk5r1
Megf10
Nrxn3
Lin7b
Pclo
Aqp4
Ntsr2
Slc17a7
Fgfbp1
Necab1
Agt
Sphkap
Ppp2r2b
Bend6
Astn1
Tmem178b
Celf4
Gria1
Lrrc4c
Ctnnd2
Slc19a3
Wnt6
Syngr3
Dnm1
Phf24
Atp6v1g2
Mag
Arnt2
Ptprn
Bcat1
Gjc3
Cacna1e
Atp2b2
Chl1
Fam169a
Ptprz1
Asic1
Gnal
Opcml
Phyhip
Cnr1
Clip3
Camk2a
Grm4
Snap91
Nrxn1
Coch
Lrrtm3
Lgi1
Trnp1
Lingo1
Ildr2
Edn3
Cntfr
Ano3
Mast1
Napb
St6galnac5
Bcas1
Lypd1
Phactr3
Megf11
Slc22a17
Omd
Dlgap3
Ggt7
Ppp2r2c
Arhgef4
Dclk1
Itpka
Celf5
Fat2
Tubb4a
Slc9a2
Unc13a
Gng7
Fxyd7
Fam19a2
H2-Q1
Cldn11
Slc25a18
Ntm
Ntrk3
Ppfia2
Slc7a11
Brsk1
Sv2c
Ugt8a
Camk4
Ndst3
Cyp46a1
Asgr1
Elavl2
Ckmt1
Syp
Epb41l3
Clec2l
Pak1
Map6d1
Matk
Stum
Erc2
Sez6l
Map1a
Anks1b
Snhg11
Penk
Pglyrp1
Rims3
Lhfpl4
Tceal3
Plppr5
Ypel4
Asphd2
Car11
Cadm3
Rell2
Gabra1
Kcnj13
Hcn1
Tmem198
Drp2
Tspoap1
Slc8a3
Aplp1
Itih2
Shank2
Rgs7
Mrgprf
Kcnab1
Camk1g
Clvs1
Tro
Sowaha
Ak5
Slc35f2
Ccdc92b
Tenm4
Enox1
Kcnh3
Gpm6b
Nrgn
Lrp8
Tnr
Zmat4
Lonrf2
Fgf12
Tub
Faim2
Pcyt1b
Vstm2b
Adra2a
Cacna2d2
9330159F19Rik
Rab15
Cntn2
Ctxn1
Tmem121b
Mkx
2019-09-05
Fam171b
Galnt13
Bmpr1b
Basp1
Fbxo44
Scn2a
Ppfia3
Rorb
Brinp1
Ptprn2
Chd5
Gpr85
Gabrg3
Amph
Wnk3
Kif5c
Wscd2
Zfyve28
Plch2
Fam180a
Galnt16
Ephb6
Ephx4
D430041D05Rik
Mapk10
1810041L15Rik
Agap2
Col8a2
Nrn1
Pcnx2
Pak3
Pde1b
Rab3b
Lrp1b
Tmem88b
Sh3gl2
B3galt1
Elovl4
Slit1
Lrrc4
Syt3
Slc14a1
Adcyap1r1
Chn1
Lsamp
B4galnt4
Ube2ql1
Fam19a5
Cdh20
Bex1
Kcna6
Negr1
Notum
Lrrc4b
Kcnc3
Ankrd45
Rasgef1c
Serp2
Cadm4
Ddc
Kifc2
Stac2
Rnft2
Hepacam
Abat
Gprasp2
Syt5
Rab6b
Kcnab2
Slc35f1
Sel1l3
NA
Myo5a
Nwd1
Shisa6
Gpr83
Trhde
Kcnab3
Rgs17
Islr
Zfp536
Baiap3
Arxes1
Sarm1
Asphd1
Msi1
Begain
Nyap1
Dzank1
Slain1
Rgs4
Tceal5
Kl
Cacna2d3
Rbp4
Sfrp4
Padi2
Rpp25
Slc9b2
Trim66
Ncs1
Myoc
C530008M17Rik
Slc6a15
Flrt1
Cbarp
Nrcam
Bcl11a
Slitrk4
Il18
AW551984
Apc2
Mgat3
Ank2
Prrx2
Fbln7
Itgb8
Morn4
Clcn2
Nwd2
Stra6
Cntnap1
Lingo3
Rnf208
Scn4b
Kif17
Atp1a2
Hpcal4
Ndrg4
Nrip2
Rasal1
Apcdd1
Chrnb2
Kcnq5
Serpini1
St8sia1
Ppp1r1b
Diras2
Atp1b2
Ankrd34a
Pnck
Arhgap36
Adam11
Podxl2
Syt9
Plppr3
Cacna1a
Ngef
Rbfox1
Tpd52l1
Nat8l
Bhlhe22
Tmem151a
Efna3
Gap43
Dclk3
Col26a1
Snca
Sox8
Dcdc2a
Wasf3
Igsf11
Pcdh15
Syt12
F3
Kcna4
Tbx18
Ust
Prkar1b
Rimklb
Shisa8
6030419C18Rik
Hdac11
Dlg4
Cemip
Slc4a4
Id4
Sema4g
Lrrn2
Pde1a
Col9a3
Slco4a1
Dlg2
Car12
Sez6
Mdga2
Tspan33
Mmp24
Rragb
B230217C12Rik
Cacng4
Dpf1
Grik3
Sox9
Sox2
Magi2
Syngap1
Jakmip1
Shisa4
Gria3
Kndc1
NA
Itih5
Wfikkn2
Ppm1e
Adgrv1
Rimkla
Npy1r
Epb41l1
Slc24a3
Kcnmb4
Bche
Cbs
Grik2
Lin7a
Arhgap33
Wdr86
Slc12a5
Ntrk2
S1pr5
Glt1d1
Gabra3
Rbfox3
Prelid3a
Cacna1i
Dact2
Osbp2
Itih3
Tmem59l
Elfn2
Nacad
Gcnt4
Robo1
Sgpp2
Six2
Lcat
Fam19a1
Plk5
Kcng1
Ryr1
Grik4
Clmp
Otud7a
Moxd1
Rasgrp1
Ifitm1
Carmil3
Tmem25
Slitrk2
Cdh22
Ryr3
Dgki
Nmnat2
Itm2a
Tnfrsf11b
Tiam2
Dio2
Dcaf12l1
Ache
Wbscr17
Shisa3
Larp6
Rab11fip4
Ppfia4
Lrfn1
Shox2
Pacrg
Mtmr7
Shd
Kcnn2
Cacna1b
Igdcc4
Sox21
Fat3
Mllt11
Cacna1h
P2ry12
Nalcn
Fcho1
Zfhx4
Mpzl2
Atp10a
Frmpd1
Mal
Entpd3
Trpm2
Grip1
Maneal
Gfra4
Ngfr
Plcxd2
Hcn2
Dbn1
Tyro3
Adcy2
Gsg1l
Atp1b1
Prrt1
Carmil2
Chdh
Syngr1
Abhd3
Rap1gap
Lrrn3
Car13
Zfp385c
Mdk
Tvp23a
Crtam
Rgs11
Bdh2
Wnt5a
NA
Spock2
Mas1
Zfr2
Slc38a1
Dzip1
Zfp385b
Plxnb3
Slc47a1
Crym
Vamp1
Trim46
Kcnip3
Nov
Rnf180
Cacna1g
Prkcb
Htr1b
2810459M11Rik
Ipcef1
Npas2
Inpp5j
Slc4a8
Cpne5
Zfp385a
Hmgcs2
Fam81a
Rtn1
Mark1
Adora1
Smim10l2a
Snx32
Zfp941
Chrd
Lama1
Fjx1
Tmem91
Frzb
Ociad2
Daam2
Plch1
Sfxn5
Srgap3
Arhgef33
NA
Tspyl5
Klhdc7a
Ephb2
Acvr1c
Chd3os
Hcar1
Cd248
Gpr75
Unc5c
Necab3
Pkib
1700003E16Rik
Nat8f4
Pamr1
Myl6b
Kcnd2
Rab3c
Pigz
Srarp
Degs2
Csdc2
Sema5b
Efhd1
Il13ra2
Fgf9
Fndc4
Lrrc73
Srrm4
Ccdc74a
Gls2
Fam84a
Inha
Epdr1
Phgdh
3632451O06Rik
Sptb
Med12l
Grin3a
Zdbf2
Serpinf1
Slc40a1
Foxred2
Sobp
B3galt2
Ccdc136
Lix1
Eomes
Cux2
Fstl4
Abcd2
Shisa9
Gsdme
Stx1a
Slc27a2
Tmem35a
Gdf11
Cyfip2
Htr7
Peli3
Epop
Smarca1
Ggact
Drd2
Gstm5
NA
Syt17
Rasl10b
Cldn10
Grm1
Ogn
Lypd6
Thsd7b
2010300C02Rik
Sytl2
Adamts20
Erbb4
Add2
Scrn1
Scamp5
Eya1
Lypd6b
Btbd11
Lgi4
Tspyl4
Ankrd55
Mdga1
Peg3
Adap1
Col11a1
Slc2a13
Ano4
Ccl27a
Pnpla3
Klhl32
Tmem119
Zfp811
Clstn2
Scara3
Rab37
Hnmt
Olfml1
Cttnbp2
Dkk3
AI464131
Gabrq
Cilp2
Tmem132c
Camk2n1
Fam26e
Clec11a
Pla2g7
Tmem266
Pfn4
Gas7
Grem1
Atp13a4
Olfm1
Mt2
Hrh1
Gabbr1
Fbxl2
F5
Rhof
Asb16
Camkk1
Rhpn1
NA
Arfgef3
Robo3
Susd4
Paqr6
Tubg2
Srcin1
Amt
Atp8a2
Gpr173
Hs3st3a1
Kcna1
Tmem240
Micu3
Gp1bb
Camk1d
Pfn2
Neurl1a
Wnt7b
Kcnd3
Ccdc30
Kcna2
Plekhb1
Efnb3
Pdxk
Vstm4
Six1
Col4a6
Nap1l3
Lzts3
Tram1l1
Kirrel3
Eya4
Pak6
Cdkl4
Reep2
AI854703
Angptl7
Arhgef9
Wnt5b
Crmp1
Syn2
Csmd1
Efcab1
Gm11627
Wnk2
Acsl3
Shc2
Etnk2
Dgkg
Ppp1r9a
Gpld1
Cpz
Fam241b
Zscan18
Gpr176
Otof
Prom1
Adam22
Zfp612
Scn1b
Ahi1
Tmem150c
Nptxr
Ppp4r4
Prph
Gnaz
Zfp365
Slc7a8
Col25a1
Kcnc4
Slc22a4
Cabp1
Epha3
Gpr135
Bcl11b
Rad54b
Ccdc148
Evi2a
B230216N24Rik
Fzd9
Syt11
Olfml3
Trp63
Cpt1c
Fam110b
Dixdc1
Etv1
Aebp1
Rgs7bp
Egfr
Sgip1
Syt14
Arxes2
Camk2b
Gstm6
Prkcz
Adcy5
Fam69b
Plppr2
Slc16a12
Sidt1
Cdhr1
Serpina9
Twist1
Thpo
Arc
Nptx1
Myh10
Wdr54
Lpar1
2810021J22Rik
Nova1
Tfap2a
Sult2b1
Lrrc75b
Abca9
Aox3
Il34
Tmem163
Osbpl1a
NA
Fbln1
Map9
Nanos1
Slc25a27
Prr16
Klhl29
Ttll11
Cacnb1
Kcne2
Egr3
Erich3
Cideb
Cmbl
Samd14
Fzd2
Mapk8ip1
Rab36
Gsta4
Mrvi1
Slc2a12
Tenm3
Itga10
Sphk1
Gstm7
Fads6
Ncdn
Grin2d
Ablim2
Garnl3
Nudt11
Rnf157
Islr2
Zkscan2
Hs3st5
Pld5
Homer1
Ccdc92
Sh3rf3
Tiam1
Slc16a6
Spred3
Dagla
Mchr1
Cited1
Pcdh20
Dact3
Adra1d
Enpp2
Tpbg
Gdf1
Fam184a
Rnf165
Fam213a
Vash2
Pdzrn4
Tmem200a
Tmem191c
Slc39a2
Zfp599
Fam229b
Efhc2
Tlcd1
Enpp1
Isyna1
Zfp831
Ndn
Lrtm2
Gm5148
B3gat2
Rxfp1
Cacna1d
Pla2g3
Gal3st3
Bex2
AI504432
Slc16a11
Omp
Ptpro
Kcnc2
Slc2a6
Shroom1
Cib2
Slc5a6
6430571L13Rik
Gspt2
Whrn
Fn3k
Ankrd35
Plxna3
2019-03-04
Lrp11
Slc7a4
Tmc7
Gm973
Slc2a3
1700048O20Rik
Gm5124
Fbxo16
Cgref1
Mlc1
Arsg
Gpr22
Nme5
Bnc2
Sgms2
Fam20c
Shc4
Apoe
Dennd6b
Sorcs2
Hs6st2
Nat8f1
Dlk2
Grip2
Rasl10a
Nphp4
Ptprd
Cdh19
P2ry14
Dclk2
Igf2
Rhov
Rspo3
Cplx2
Abca2
Ankrd13d
Neto2
Flywch2
Chrdl1
NA
Colca2
Kctd13
Bicd1
Osr1
Afap1l2
Kcne4
Impact
Pipox
Gpr68
Efs
Sorl1
Tnfaip6
Mmp17
Kctd8
Cacnb3
Adcy8
Xk
Akap6
Peg10
Sgsm1
Prdm6
Zbtb8b
9530077C05Rik
Hsf2
Fmn1
D7Ertd443e
Col22a1
Cox6b2
Bmp5
Capn6
Cyp4f15
Tox
Hmgcll1
Pcp4l1
Lmod1
Siglech
Rnd2
Rnf32
Gli1
Foxp2
Myl9
Slc35g1
Amy1
Mpp2
Kctd1
Gdf10
Eml5
Mt1
Fam234b
Trim67
Trpc3
Bbs4
Bri3bp
Fzd7
Map1b
Rtl6
Snap47
Rab40b
Ptpn13
1110051M20Rik
Ogdhl
Vps51
Hcn4
Thy1
Gpc3
Map7
Camk2n2
Rap1gap2
Dusp26
Tmeff2
Nbl1
Pcbd1
Cldn2
1500009L16Rik
2019-09-06
Wnt4
Faah
Sowahb
Sdk1
Ptger3
Zc3h12b
Gpd1
Mmp16
Extl1
Mpv17l
Spire1
Fez1
Prcd
Rec8
Porcn
Dlg3
Fras1
Frmd3
Nudt10
Nr2f1
Herc3
Satb2
Pdgfrl
Slc16a4
Ank3
Flvcr2
Spp1
Cyp7b1
Elovl6
Capn3
Fam222a
Prkar2b
Gli2
P4htm
Tmem184c
Fgf14
Vwc2
Wwox
Arhgap32
Lss
Nkain4
Elovl7
Actr3b
Gal3st1
Pm20d1
Ncam1
Cobl
Sbsn
NA
Chadl
B3galnt1
Slc39a8
Fgf13
Pls1
Hook1
Relt
Slit2
Nipal4
Cap2
Slc16a1
Ndrg3
Tmem56
Crb2
Pcolce
Pdzd4
Ahcyl2
Medag
Sh3gl3
Mfsd4a
Psd3
Thbs2
Tecr
Gprc5c
Bsg
Gfra2
Tcf7
Strip2
Flrt3
Crtc1
Ccdc39
Scn3a
Izumo4
6430573F11Rik
Fam198a
Car2
Arhgap39
Ntn5
B630019K06Rik
Tgfa
Lsr
Meis3
Hspa12a
Rps6ka6
Klc2
Kcnj3
Napepld
Zfp618
Mrap
Slc25a23
Igfbp2
Sfrp1
Faxc
Cds1
Lrp1
Ss18l1
Hapln1
Ndufa13
Rtn4rl1
Ssbp2
Cited4
Gpr27
Thrb
Mapre3
Cit
Ddr1
Gnao1
Steap3
Prr36
P4ha3
Enc1
Syne4
Pcx
Khdrbs3
Gpc6
Kbtbd11
Lrrc55
Sh3bp1
Fam131c
Gfra1
Lgi2
Irak1bp1
P2ry13
Tspan5
Olfm2
Dock7
Rgs14
Ppp1r3f
Sec61a2
Gpr137c
Usp54
Nxph3
Aspg
Gnai1
Epb41l4b
Cstad
Gpt2
Lrp3
Acss3
Cxadr
Tspan3
Chst8
Nat14
Kif21a
4931428F04Rik
Gm38402
Gprasp1
Tmem28
Ssc5d
Susd2
Paqr8
Fzd1
Rundc3b
Clmn
Hebp2
Arhgap44
D430019H16Rik
Dact1
Ankrd6
Adgrl1
Sesn3
Atat1
Rdh5
Tomm6os
Ptbp2
Ramp1
Slc1a4
Pla2g4e
Dnajc27
Zfp783
Proser2
Ocln
Eya2
Zim1
Strbp
Ovgp1
Egfl8
Fbxw10
Upb1
Ikzf4
Mpp3
Prnp
Rab30
Zfp454
Dzip3
C1qtnf7
Park2
Usp11
Stau2
Efcab12
Pbx4
Slc46a1
Trpc1
Pxylp1
Frem2
Gramd1b
Rnf43
Gjc2
P2ry1
Rasd1
Pmm1
Ppil6
NA
Arhgap24
Dyrk3
Samd11
Ttyh2
Eef1a2
Tspyl2
Kcnk2
Tom1l1
Ptk2b
Rida
Prrx1
Lor
Lacc1
Col11a2
Enpp5
Grik5
Nr4a2
Ptprs
Egfem1
Ralgps1
Sat2
Col6a2
Prune2
Col1a2
Vamp2
Pitpnm3
A930033H14Rik
Rasd2
Gpx8
Bdh1
Dmxl2
A2ml1
Lamc3
Sugct
Spag4
9230110C19Rik
Wnt7a
Lrrc10b
Kcp
Tpm2
Alg2
Hrasls
Robo2
Dpyd
Ppm1l
Eml2
Grem2
Lrrc3
NA
Dtna
Runx2
Ece2
Speg
Ebf4
Zfp940
Bex3
Ndrg2
NA
Astn2
Mok
Slc39a10
Tmem117
Prtg
Serping1
Ttll3
Actn3
Tmem14a
Kcnd1
Acat3
Glul
Dusp14
Cth
Nos1ap
Slc6a9
Pde10a
Tmem132d
Apbb1
Nlgn2
Sned1
Cd83
Atp2a1
Fcrls
9330182L06Rik
Klhl23
Ydjc
Dtx4
Hpgds
Fam213b
1500011B03Rik
9330151L19Rik
Zfp677
Adam23
Foxp4
Pld3
Zfp786
Esrrg
Foxo6
Sgtb
Hr
Esyt3
Abcc8
Reps2
Ankrd13b
Slc38a2
Sdc2
Igfbp6
Hsf4
Gas1
Rhobtb3
Dnm3
Ttc3
Clic6
Mum1l1
Mttp
Oscp1
Mboat7
Lynx1
Dhtkd1
Dse
Ckb
Arhgef17
Trim32
Slc7a2
Fzd3
Rragd
Prlr
Aif1l
Prmt8
Vipr2
Ddit4l
Sorbs2
Camta1
B4galt2
Stxbp1
Igsf9b
Ric3
Tnik
Fam71e1
Ninl
Zwint
Phkg1
Gpr153
Trem2
Rcan2
Cubn
Gpcpd1
Ptges
Src
Lmntd1
Ypel1
Inpp5f
Sox6
Plekha5
Adam12
Aqp11
Ptgfr
Ripor2
Zfp354b
Ankrd42
Pllp
Klhdc8a
Tacr1
L1cam
Psat1
Ccno
1700001L19Rik
Tmem8b
Aldh5a1
Magee1
Mras
Colec12
Slc1a1
Frmd5
Adap2
Ankrd24
Kcnh1
Ccdc149
Fbxo34
Metrn
Slc29a2
Emc9
Bbox1
Cercam
1700088E04Rik
NA
Gm10037
Zfp286
Grp
Atl1
Ace2
Dync2h1
Efemp1
Fkbp1b
Sbk1
Hectd2
Trpm3
Cep170b
Zfhx2
Serpina1b
AA414768
Smarcd3
Zfp354c
Lurap1
Ttc34
Fam131a
Polk
B4galt6
Ccdc141
Saxo2
Lrig1
Scai
Ppp3r1
Ptpn22
Cacna2d1
Rgma
Col13a1
Slc16a7
Sec14l2
Map3k13
Col6a1
Hkdc1
Spsb4
Mtx3
Dnah1
Fndc10
Xrcc5
Usp53
Sdsl
Pcdh7
Agbl2
Rpgr
BC025920
Cdkl1
Pip5k1b
NA
Arhgef19
Rtl8c
Thbs4
Sms
5330417C22Rik
B3gnt9
Kcnj12
Ttc8
Kcns3
Gldc
Rcn3
Ldhb
Mpped2
Lrrn1
Ywhag
Ngb
Zfp692
Psma8
Kcnk5
Ahcyl1
A230050P20Rik
Hhip
Katnal2
Abhd12
B4galnt1
Plpp7
Pde4a
Ggt1
Lrfn3
Satb1
Patj
Dtnb
Flt3
Bicdl1
Cpxm1
Snai1
Mpzl3
Tmx2
Ak4
Anxa8
Mblac2
Lancl1
Ctf1
Dnal1
Ccdc151
Tcaf1
Nsmf
Edil3
Dpy19l3
Arntl
Pygo1
Wdr34
Vps37d
N4bp2l1
Praf2
Pde8b
Rtkn
Cdkl5
Abhd8
Mob3b
Tceal1
Slc25a22
Prg4
Hlf
Slc29a4
Bco2
Traip
Sytl1
Avil
Nacc2
Dtx3
Gpd2
Stk39
Smoc2
Bmpr1a
Fahd2a
Acot7
Gca
2019-03-01
Timm8b
Grhl1
Pfkfb4
Gk
Anpep
Cpe
Ppargc1a
Arhgef25
Ano2
Pla2g4a
Oxtr
Stk32a
Scd2
Col12a1
Kalrn
A2m
Aldh7a1
Phtf1os
Ranbp17
Adra2b
9030612E09Rik
Gdpd2
Acot11
Znrf3
Nog
Lair1
Sntg2
C1qb
Vstm5
Tecpr2
Asrgl1
Rbp1
Maob
Opn3
Chn2
Plekhf1
Tmx4
Arhgap42
Col1a1
Bmyc
Tmem45a
Smad3
Entpd6
Hap1
Rpusd1
