# Supplementary material for: Endothelial heterogeneity across distinct vascular beds during homeostasis and inflammation
Source: eLife journal article supplement (doi:10.7554/elife.51413), 2020-01-16
Supplement: supp [file elife-51413-supp-v1.zip › elife_poa_e51413_Supplementary_file_5.xlsx]

## Sheet: RibotagLungECParenchymalDegs
Lung EC Parenchymal Genes
Sftpc
Ager
Slc6a2
Chil3
Wfdc2
NA
Clec7a
Muc1
Retnla
NA
Lyz1
NA
Hoxa5
Krt7
Hp
Nkx2-1
Ltb
Sox11
Hoxb4
Hpgd
Baz1a
NA
Pax5
Slco2a1
Hotairm1
Gpx3
Tbx2
Prx
Slc17a9
Emp2
Hba-a2
Jchain
Mir6236
Atp6v1c2
Adrb2
Itih4
Gramd2
Gata3
Scn7a
Saa3
NA
Cfap46
NA
Scgb3a1
NA
Krt18
Lars2
Glb1l2
Hba-a1
Gmfg
Epcam
Aldh1a7
Cbr2
Spn
Ccl6
H2-DMb1
Cebpb
NA
Itgal
Wdfy4
Cdhr3
Il3ra
Hilpda
Dynlrb2
Rtkn2
Laptm5
Ccdc180
Aard
Cd300ld
Mmp3
Lat2
Hoxa7
Plcb2
Taf3
Gna14
Crb3
Ccdc68
Glrx5
NA
Irf4
Egfl6
Cyp2f2
Arhgap45
NA
Shroom3
BC005561
Hoxb5
2310033P09Rik
Runx1
NA
Chchd2
Gprc5a
Ankrd63
Cd52
Ptpn7
St14
Psmd1
Cd72
Adam33
Tnfrsf13b
Sec62
NA
Slamf9
Pirb
Krtcap3
Mfap2
NA
Amer1
Rps10
Fam46c
Frrs1
Myo1g
H2-Ab1
Cfd
Ralbp1
Lrrc71
Rps24
Ccdc85b
Eif5b
Gm13889
Ccar1
Cybb
Hsp90aa1
Rps18
Ly6g6d
Ehd4
Rplp1
Inpp5d
Mapk13
Pttg1
Cyp2s1
Rhoh
Myl6
NA
Mettl24
Irx1
Tcof1
Rubcnl
Erich2
Vav1
Ptpru
Lyz2
Chil1
Sh2d4a
Upf3b
NA
Foxp1
Scnn1a
Rtf1
H2-Aa
Il21r
NA
Cfap126
Amotl1
Clic3
NA
Sell
Dennd1c
Frg1
Spint1
Fgr
Rps9
Cd27
Adrb1
Cd2
NA
Hck
Luc7l3
Dync1i2
Lbx2
Cyp1a1
Zbtb20
Rps21
Colq
Sash3
Ptprc
Akr1c13
Wdr89
Dyrk2
Gpnmb
NA
Gm16023
Nckap5
S100a16
Ptafr
Retnlg
Chd7
Anp32a
Hoxa4
Vangl2
Rpp25l
Hopx
Zfhx3
Tox2
Zfp524
Abcc3
Rpsa
Ly6i
Psmb10
Fam124a
S100a6
Pcdhgc4
Lrrc23
Psd4
Pde9a
Piezo2
Sox4
Dnah10
S100a9
Phf14
Ccdc34
Tbx5
Ccdc22
Card9
Hoxa3
Pard6b
Rps26
Tmem256
NA
Nup210
Tnfsf13b
Tspan32
Myo5c
Atg101
C3
Lck
NA
Lpxn
Ppp1r12a
Cebpd
Lgals3
Usf1
Ccl9
Srek1ip1
Ankrd44
NA
Trir
Ptx3
Cfap100
Dnah6
Napsa
Ccr2
Alox5ap
Ncf2
Scand1
Siglece
NA
Nfkbia
Tmem2
Tet3
Arf5
Tjp3
Hvcn1
Dram1
Adgrg2
Sema3c
Nhlrc2
H2-Eb1
Stard9
Gpank1
Pik3r5
Il10ra
Kbtbd3
Qsox1
Acvr2b
Dnah5
Arhgap9
Abt1
Lcp1
NA
Pkp3
Skap2
Larp4b
Mgst2
Sema3f
Rsl24d1
Arid3b
Lbh
Mrc1
Adamtsl2
Hif1an
Son
Tnrc6a
Maml2
Spef2
Itgb7
NA
Sema3g
Nek5
Csrnp1
Hoxb2
Ago4
Ccdc88b
Fhad1
Spef1
Etfb
Cdh1
Psen2
Rac2
NA
Gsta3
Btk
Cadm1
Sla
Gpatch3
Matn4
Cox17
Rbm47
Myh14
Phf20l1
Psmd13
Cd84
Rhebl1
Pstpip1
AB124611
Klf2
Tifab
Slc37a1
Pex6
Ackr2
Otulin
Rpl35a
Pabpn1
Eif4e3
Rplp2
Ptpn18
Cfap65
Hnrnpm
Nfe2
Arhgap4
Hdgf
Emc1
Itpr2
Ptgfrn
Mxra7
Snrpe
Lamc2
A430005L14Rik
Psmg3
Spint2
Ifi209
Ubn2
Ngdn
Ddah2
Lpcat1
Zfp992
Arap1
Hsp90b1
Ltbp2
Lrg1
NA
Hyi
Ccdc28b
LOC102634709
Brd4
Lrrc36
Nkapl
Smim11
Plxna1
Gata2
Socs7
Pygo2
Cfap44
Magohb
Brd7
Ppp1r35
Tcf21
Slco3a1
Rps3a1
Rnf8
Pde5a
Lamb3
Yeats4
Bcl2l12
2410022M11Rik
Atf4
Bst1
Klf7
Rbm10
Grrp1
NA
Lysmd1
Med19
Pmaip1
Ccdc85c
Epn3
Adamts15
Ccdc113
Atp7b
Abhd17c
Nfatc4
Slc26a4
Pygl
Slc5a1
NA
Hoxa2
Fibin
Il11ra1
Nme1
Copz1
Dcaf13
Prss12
Adgrl3
Atp5k
Nkd1
Tmem221
Snrnp70
Ncf1
NA
Prdm8
Samd5
Lgi3
Nox4
Irx2
Fam110a
Zfp503
Tmem160
Ube2j2
Megf6
Cnn1
Serpina3f
Tmem102
Sertad1
Snx20
Ltf
Clec12a
Ikzf1
Acot1
Clec10a
Itga3
Ripply3
Gimap1
Aff3
Mcrip1
NA
Lpin1
Mfap4
Rbm14
Cd37
Maats1
Car3
Rps14
Ak7
Snx8
Pou2f2
Srp9
Slc16a9
Upk3b
Tap2
Rpl9
Cdca7l
Rhoj
1810037I17Rik
Lrrc14
Misp
Nenf
Plaur
Ttc25
Ndufb7
NA
Nkd2
Gm12216
Tmem69
NA
NA
Cdk11b
Psmd4
Akap17b
Cd44
Slc29a3
Hpn
Cc2d1b
Met
Rpn1
Lsp1
Smarcd2
Trim5
Nova2
Dll1
Mms19
Eef2kmt
Cracr2a
Dnase2a
Armcx4
Agpat4
Elf3
Tssc4
Hdac7
Dhrs13
Nthl1
Mfsd6l
Prickle2
Rpgrip1
Arid1a
Clec4a1
Plekha2
Ccpg1
Npm1
Supt16
Kmt5c
Alas2
Ndufa3
Aamp
9130008F23Rik
Scd1
Ubxn10
Ptgir
Plb1
Ccdc153
Trappc4
Mycbp2
NA
Zfp688
Psmd2
Txnl4a
Trpm6
Bik
Gsn
Dok1
Sppl3
1110038F14Rik
C1s1
Syt15
4933408B17Rik
Pard3
Sh3pxd2a
Abcf1
Gpaa1
Ppp1r15a
1700017B05Rik
Stk4
Cep44
Dock2
Brd3
Gpsm3
Slc35e4
Col27a1
Nsrp1
Erbb3
Adamtsl5
Riiad1
Klf5
Cfap161
Tusc5
Itgb6
Coq8b
Hipk2
Efcc1
Lif
Tmcc2
Ndufaf8
Tsen34
Nsmce3
Ano6
Riox1
Fam114a2
Cyth4
Ppie
Havcr2
Ar
Cx3cr1
Rps8
Dhrs7b
Esrp2
Taf15
Chfr
Il17rd
Phldb3
Mycbp
Phc2
Tsfm
Trnau1ap
S100a8
Cmah
Samd1
Rab20
Cavin1
Prkar2a
Rpl14
Tgif2
Ap5b1
Pctp
Atxn7
Adgra3
Cib1
Hsd11b1
Rpl41
NA
Pcyox1l
Dnajc1
NA
Msl1
Borcs6
C5ar1
Dok2
Soga1
Snupn
Fkbp14
P2rx4
Unc13d
Itga2b
Polr3gl
Erbb2
Gan
Vegfd
Ttc39c
Rara
Tuba1b
Akna
Ces1d
B3gnt7
Dnali1
Mmp14
NA
Ucp2
Enho
Ldlrap1
Ndufa5
Agtrap
Fam46a
Erp29
Sbno2
Pnp2
Dync1h1
Nradd
Rbm4b
Spi1
Katna1
Lrrc51
NA
NA
Krt80
Grtp1
1810024B03Rik
Nudt16l1
Syk
A4galt
Pex11g
Plscr3
NA
AA986860
Prdm1
Ddx28
Egflam
Mal2
Ankrd33b
Ephb3
6820408C15Rik
Cdipt
NA
Krt19
Pla2g12a
Ikbip
Mum1
Hoga1
Ankrd17
Ncf4
Hoxb3
Snrpd1
Sf3b6
Ip6k3
Lipg
B4galt1
Bdkrb2
Pik3cd
Psmb4
Xpnpep2
Gpat4
Lamtor2
Tnfaip2
Gigyf1
Itga2
NA
Pld4
Rcc1l
Tpm3
Hmbox1
Kctd2
Gon4l
Mob3c
Bst2
Il6ra
Tnrc18
Mapt
Dennd2d
Pim1
Col7a1
Arid2
Tmem164
Depdc7
Fignl2
Rpa2
Setd1a
Rbm6
Lig1
Lrrc32
Rnf141
Bcl2l1
2510039O18Rik
Kctd14
Rbm34
Dhcr24
Ccr1
Arsj
Rp9
Epha2
Hint2
Serpine1
Wdr83os
Parp11
Dcp2
Wwc1
Blmh
Scx
Sowahc
Fam193b
Vhl
Flywch1
St5
Rpl27a
Eln
Gdf9
Batf3
Lysmd2
Ctdspl
Emsy
Gxylt1
Irf1
H2-DMa
Ccl5
Ctdsp2
Ifngr2
Pbx2
Pcid2
Tmem131l
Sh3bp2
Hemk1
Pdia6
Tslp
Gm11478
Gm4841
Msr1
Bola2
Mme
Ogfod2
Pbxip1
Cog8
Capn1
Vasn
Abcg3
Kcnn4
Zbtb46
Sec61b
Nectin1
Adgrg6
Polr2h
Socs1
Fam46b
Ptpn6
Arhgap30
Tbx3
C2cd2
Cln6
Edc4
Atp5g3
Pomp
E030030I06Rik
Rprml
Faap20
Dusp23
Arrdc1
Proser3
Nectin3
Gpx4
Guk1
Fcer1g
Trim8
Tmem208
Hdac4
Rbm17
Mkrn3
Il17re
Ngrn
Zc3h3
Lias
Apol9b
Oard1
Wdr45
Eif2b4
Nr1h3
Tardbp
Prr13
Ikbke
Kif13a
Sdf2
Morf4l1
Gfod1
Tmem268
Ston2
Sdc4
Irf5
Klhl5
Crip1
Rps4l
Urb1
Abtb1
Efnb1
NA
Pigyl
Cd74
Cops9
Ramp2
Nr6a1
C1ra
Skap1
Daam1
Aatk
Plaa
Rgl2
Prrc2a
Trp53i13
Psmb3
Mdp1
Sf3a3
Psmb1
Rab7b
Wdr31
Cd24a
Rnf144a
Rsrp1
Trabd
Tmcc1
Abca7
Apobec3
Lrp4
Meis1
Junb
Taldo1
Fkbp11
Mettl17
Snrpb2
Isy1
Cct8
Rassf1
Irak4
Nrde2
Dnajc7
Med30
Tmem212
Slc39a6
Smarca2
Spa17
Siva1
Hbs1l
Pdcd5
Ifrd1
Ten1
Wrap53
Stx3
Tbx4
Tap1
Pkig
Itga4
Slc39a4
Retreg2
NA
NA
Pfdn5
Megf8
Ccl7
Hypk
Bin2
Chia1
Foxs1
2200002D01Rik
Nhlrc1
B4galt3
Acp5
Ptges3
Jaml
Rgs12
Scel
Nfkbil1
Btla
Gcc1
Emid1
Tsc22d3
Ogfr
Prr3
2410004P03Rik
Ifnlr1
Tmem44
Yipf2
Eif2ak2
Hs3st1
Nup50
Dmkn
Slc25a37
Myo9b
Bmpr2
Mapk3
NA
Chka
Il17rc
Cep164
Cfap206
Sgsh
Rcc2
Mepce
Tekt1
NA
Myrip
Polr2l
Tspan18
9430038I01Rik
Lpar3
Sh3bp5l
Ncoa6
H2-Ob
Srgap1
Trim41
Dnah2
Psmd9
Bcdin3d
Twnk
Nlrp3
Tnrc6c
Kdm7a
Ccdc25
Tmem120a
Fam98c
Pak4
Elk4
Eif2s3x
Plbd1
Ebpl
Fam189a2
Prkrip1
Maf
Ciart
Fam183b
Dapk2
Tmem41a
Mpeg1
Ccdc61
Tmem176a
Cdc25a
Tnpo2
Ttc7
Tspan14
Phactr1
Ssh2
Samsn1
Rangap1
Llgl1
Arhgap23
Rassf7
Fyb
Mtfr1l
Tamm41
Tbc1d10a
NA
Fermt3
Ptprk
Nudt3
Mrpl17
Tnfaip8l2
Nr2f6
Epb41l2
NA
Fpgs
Tnfrsf26
Plcb3
Hbb-bt
Tep1
Nudt1
Egln2
Kit
Ss18
Ift52
Fam222b
Trp73
Rpl37
Thap3
Aif1
Pfdn2
Kdm6b
Svbp
Mogs
Stub1
Slc36a2
Dbndd2
Jun
Prkce
Apaf1
Ebi3
Scnm1
Tbcc
Rbm8a
Tmem30b
Brms1
Maml3
Syngr2
Ctsc
2810408A11Rik
2019-03-02
Mindy1
Tnfsf12
NA
Jpt1
D17Wsu92e
Atp6ap1
Coq7
Rab26os
Fam35a
Prcc
NA
Rsph4a
Tkt
H2afv
Gipc2
Phip
Cd300a
P2rx5
Actr8
Raver2
Tor1b
NA
Rapgef4
2019-09-02
Rsph1
Eml4
Fam53a
Itpripl2
Cish
Pycr2
Ing2
Rab29
Mblac1
Xpot
Lgmn
Slc15a4
Zfp954
Phf1
Bloc1s4
Ddi2
Epb41
Zbtb7a
D17H6S53E
Ndufb3
Pigc
Tagln
NA
Dnah9
Gpr157
Ncbp3
Med28
Ctsd
Fahd1
Dna2
Usf2
Actb
Gar1
Tmem125
Stk11ip
Mnt
Bcl9l
Rab27a
Rem1
Zbtb4
Arl2bp
Cisd3
Ptpre
