# Supplementary material for: Endothelial heterogeneity across distinct vascular beds during homeostasis and inflammation
Source: eLife journal article supplement (doi:10.7554/elife.51413), 2020-01-16
Supplement: supp [file elife-51413-supp-v1.zip › elife_poa_e51413_Supplementary_file_6.xlsx]

## Sheet: RibotagHeartECParenchymalDegs
Ribotag Heart EC Parenchymal Genes
Myl2
Myl3
Adprhl1
Ahsg
Slc28a2
Xirp2
Mb
Ckmt2
Lrtm1
Ckm
Actc1
Pln
C1qtnf9
Ttn
Wt1
Tmem182
Csrp3
Nrap
Cxcl9
Nppa
Trim54
Eda2r
Papln
Tnnt2
Obscn
Fsd2
Tbx20
Myh6
Hrc
Apobec2
Gata4
Myoz2
Rpl3l
Myom2
Mylk3
Hfe2
Art1
Dhrs7c
Klhl31
Ppp1r3a
Lrrc39
Hspb7
Mybpc3
Itgb1bp2
Trim72
Fitm1
Tnnc1
Tnni3
Ankrd1
Myo18b
Fam89a
Sgca
Kcna5
Timp4
Fabp5
Myom1
NA
Cdh23
Txlnb
Brip1
Pparg
Cep55
Ulbp1
Cox8b
Cmya5
Srl
Cox6a2
Tcap
Ifi204
Colec11
Ebf3
Rsad2
Tmem255b
Tfpi2
Top2a
Smpx
Abra
NA
Mylk4
Lrrc2
Aurkb
Smyd1
Adamts7
Pbk
Ssu2
Sgcg
Lmod3
Perm1
Ntf3
Vash1
Klhl41
Ckap2
Ifi211
Ablim3
Tnni3k
Corin
Trim55
Popdc2
Ncapg
Art3
Tk1
Tmc8
Fbxo40
Pkhd1l1
Dlgap5
P2ry2
Cenpf
Kif20a
Zfp979
Rad51ap1
Asb14
Ccnb2
A530016L24Rik
Abcb4
Eno3
Mlf1
Rflnb
Lpin3
Synpo2l
Abcb1b
Lnx1
Slc26a10
Asb10
Ttk
Kntc1
Col4a1
Lmod2
Pimreg
Mypn
Lama4
Eepd1
Lrrc14b
Nr5a2
Cavin4
Ldb3
Kcnj5
Fbln2
8430408G22Rik
Pclaf
Ect2
Cav3
F2rl3
Mest
Scn5a
Melk
Shcbp1
Cenpi
Enpp3
Papss2
Fam19a3
Xirp1
Tmem88
NA
Nos2
Bub1
Col28a1
Mycn
Gtse1
Cdh13
Col15a1
Ercc6l
Slfn9
Ccdc80
Esco2
Trim63
Hmmr
Phf11d
Prc1
Has3
Lpl
Pgam2
Mxd3
Trdn
Knl1
Nid2
Ifit2
NA
Il27ra
Fabp3
Ripk3
Iqgap3
Plin5
Ckap2l
Ptger4
Kif4
Cdca3
Alpk2
Alpk3
Col4a2
Ccna2
Lamb1
Kif20b
Cox7a1
Slc25a30
Pxdn
Gvin1
Hspb6
Cd247
Adamts9
Cdca8
Cdca2
AW112010
Sh3bgr
Foxm1
1110002E22Rik
Gata6
Enpp6
Gm4070
Fam83d
Rrm2
Cysltr1
Tcim
Cd109
Ift122
Cdk1
Nusap1
Ppp1r13l
Jph2
Dach1
Tspan6
Dsp
Ube2c
Fscn1
Gas2
Chek2
Myocd
Stk10
Trip13
Neil3
Slc2a9
Des
Elf4
C5ar2
Prr11
Tspan12
Slc25a13
Rassf10
Mylip
Mgat4a
Cldn15
Phospho1
Haspin
Fam111a
Nuf2
C1qtnf6
Cd274
Cdca5
Sncaip
Tpx2
Cyyr1
Wnt9b
Nsl1
Ppm1j
Rassf9
Bub1b
Asb11
Ggta1
P2ry10b
Spc25
Rnf130
Kifc1
Asah2
Kif23
Stx2
Tmem173
Aspm
H2-Q5
Mastl
Asf1b
Ska3
Ltbp4
Prkd1
NA
Rbm20
Oasl1
Kctd12b
Asb2
Mki67
Casp1
Naip2
Casq2
Pole
Rrad
Ifi203
Tgtp2
Jam3
Pcdh19
Klhl4
Dysf
Ndc80
Prelid2
Thrsp
Cdc6
Mcm5
Slc15a3
Ska1
Snai2
Mis18bp1
Il4i1
Gbp9
Arhgap18
Pdgfd
Plk4
Pdlim3
Tmem140
Sgo1
Oas2
Lsmem1
Vim
NA
Hoxd8
Pabpc1l
Tpm1
Duox2
Prickle3
Plxnd1
Jam2
E2f8
Esr1
Prrg3
Etfdh
Dchs1
Pola2
Spdl1
Lims2
C330027C09Rik
Comp
Kif22
Aurka
Nck1
Mybl2
Lancl3
Fhod3
Plod1
Actn2
Arhgap10
Kif14
Cavin2
Myl1
Rad51
Mtfr2
Gngt2
Oip5
Il16
Fignl1
Fbn1
Smtnl2
Rftn1
4930578C19Rik
Idh2
Cenpa
Exo1
Plscr2
Fut4
Ndel1
E2f7
Pirt
Sh2b3
Cda
St8sia6
Bves
Exoc6
Sapcd2
Atp8b1
Rps6ka3
Tgtp1
Casp7
Myl7
NA
Polh
Nts
Car7
Arsa
Iigp1
Ddias
Uhrf1
Piwil2
Cdc45
Trim21
Diaph3
Prag1
Tmem71
Fam212a
F2r
Dtx3l
NA
Map3k3
Racgap1
Klhl24
Tnfrsf23
Rmi2
Samd9l
Dsc2
Cav2
Pole2
NA
Aoc3
Slfn3
Zfp36l2
Plk1
Ccne2
NA
Cnr2
Itpripl1
Litaf
NA
2019-09-10
NA
Ifih1
Brca1
Ptp4a3
Gas6
Wasf2
Ifngr1
Cdkn3
Depdc1b
Galnt7
Plcd1
Usp25
Igf2r
Ctla2b
NA
Tcf19
Cfh
Smpdl3a
Mndal
Ctnnbip1
Rnf213
Uba7
Gimap6
Nxpe4
NA
NA
Magix
NA
NA
Spaar
Itga6
Tinagl1
Apol10b
Phf11c
Gpr160
Coq8a
Ecm2
Lamc1
NA
Chst7
Myl12a
Cenph
Ceacam1
NA
Tnfaip8l1
NA
Slc39a7
Crkl
Scarb1
Fmnl1
Ifi44
Ehd2
Wwtr1
Rarres1
Troap
Galnt15
Ccng1
Ifi207
Il15
Unc45bos
Filip1
Tgfb1
Ccnd1
Arhgap8
Vsir
NA
Sema4c
NA
Aunip
Akr1c14
Gusb
Zfp367
NA
Nck2
Sln
Adam17
Dhrs3
Rps27l
Dennd5a
Cxcl10
NA
Cyb5r1
Ppic
Arrdc4
H2-T24
Sh2d3c
Myo1c
Ktn1
Wdsub1
Tpst1
Kitl
Map3k14
Ptbp3
Tlr4
Galnt10
Deup1
Klhl6
Lipa
Cdc42ep3
Micall2
Mcm6
Ets2
Alox12
Shroom4
Lmnb1
Kif18a
NA
Tmem123
Adm
Impa2
Smtn
Tlr2
Eva1a
Tmem154
NA
Ddx21
Ptprm
Ankrd37
Lhx6
Ttf2
Rps6ka2
Adgrg1
Cdc42ep1
Smc2
Tedc1
Kif15
Lpar4
Ccm2l
Dsg2
Mrrf
Rad54l
NA
NA
Vav3
1700025G04Rik
9930111J21Rik2
Slc25a31
Ilk
Nyx
Cenpn
Ryr2
Ces2e
Cmpk2
NA
