# Supplementary material for: Endothelial heterogeneity across distinct vascular beds during homeostasis and inflammation
Source: eLife journal article supplement (doi:10.7554/elife.51413), 2020-01-16
Supplement: supp [file elife-51413-supp-v1.zip › elife_poa_e51413_Supplementary_file_7.xlsx]

## Sheet: Fold Change versus Sap30l for R
	RiboTag FC versus Sap30l	Betsholtz FC versus Sap30l	Tabula Muris FC versus Sap30l
A230050P20Rik	1.08378	1.1185	1.48423
Abhd12	1.25389	2.26408	2.12822
Ahcyl1	1.43339	2.15458	1.69572
Apoe	1.81198	3.76502	6.28275
Bmyc	1.08132	1.01475	2.1065
Bsg	1.82034	8.05622	13.2645
Camta1	1.30316	0.942165	0.999035
Car2	1.33002	2.22306	3.23009
Ckb	1.54972	1.12957	2.36786
Dtx3	1.199	1.27816	0.792421
Enpp2	1.43037	2.28956	1.92205
Enpp5	1.28543	2.0783	2.61884
Glul	1.75029	2.50468	5.68705
Gpcpd1	1.27487	4.85356	3.27129
Gpd2	1.24246	2.59081	3.76431
Hsf2	1.06984	0.63977	0.64496
Impact	1.28074	1.7337	1.6684
Inpp5f	1.16298	1.65615	1.44361
Lancl1	1.18435	1.5847	2.23041
Mboat7	1.1749	1.35534	1.70885
Mllt11	1.28095	1.07458	1.77412
Ndrg3	1.43536	2.26524	2.43408
Ndufa13	1.39065	1.22475	1.92065
Ocln	1.16796	3.09175	3.821
Pcp4l1	1.47221	3.9951	7.00473
Pld3	1.33744	2.23814	3.1658
Pllp	1.16466	2.48235	5.08615
Polk	1.10044	2.11347	2.01245
Ppp3r1	1.47459	2.34249	1.48491
Rab6b	1.35926	1.5127	1.47893
Sap30l	1	1	1
Scd2	1.53872	2.04038	1.79873
Slc38a2	1.34454	2.04594	2.26201
Slc39a10	1.26776	3.54085	3.96796
Snap47	1.31896	2.31029	3.02771
Strbp	1.22038	1.29752	1.47195
Stxbp1	1.41696	1.87385	1.74073
Syt11	1.45317	1.28327	1.3342
Tecr	1.37079	2.10158	3.08024
Tiam1	1.22357	1.2056	1.30859
Timm8b	1.20031	1.03398	1.53288
Tmx2	1.1267	1.40437	2.89068
Tmx4	1.30106	1.72735	1.65216
Tspan3	1.40896	2.47119	3.09325
Ttc3	1.42824	2.07907	2.42023
Vamp2	1.526	1.41427	0.960302
Wfdc1	1.34843	3.46048	7.28458
Ywhag	1.5127	1.70873	1.22113
Zwint	1.41979	2.39659	2.44174
