# Supplementary material for: Endothelial heterogeneity across distinct vascular beds during homeostasis and inflammation
Source: eLife journal article supplement (doi:10.7554/elife.51413), 2020-01-16
Supplement: supp [file elife-51413-supp-v1.zip › elife_poa_e51413_Supplementary_file_8.xlsx]

## Sheet: Fold Change versus Sap30l for R
	RiboTag FC versus Sap30l	Betsholtz FC versus Sap30l	Tabula Muris FC versus Sap30l
1110038F14Rik	1.13143	1.40448	2.18057
1810037I17Rik	1.23629	1.07264	1.84252
2310033P09Rik	1.15861	1.33326	1.68163
2510039O18Rik	1.1868	1.34587	2.02293
A4galt	1.09643	1.80054	1.90429
Aamp	1.38236	1.82984	2.6223
Abcf1	1.27917	1.52366	1.33798
Abtb1	1.01989	1.85683	2.4996
Ace	1.37994	4.30711	2.69413
Actb	1.73122	4.50615	7.51388
Actr8	1.05905	1.61488	1.79528
Acvrl1	1.49233	4.82924	5.50893
Adrb2	1.41145	2.38994	3.76671
Agpat4	1.24121	2.2394	2.86792
Agtrap	1.16052	2.18291	2.30452
Amotl1	1.52192	2.24032	2.36656
Ankrd17	1.18545	1.73266	1.29559
Ankrd33b	1.09137	2.24181	2.34524
Ankrd44	1.16035	2.00154	1.85208
Ano6	1.34612	1.91608	1.66656
Anp32a	1.6381	1.16024	1.98978
Apobec3	0.997596	2.03643	1.57129
Arap3	1.4106	2.58818	1.36898
Arf5	1.44028	1.51536	1.24293
Arhgap23	1.20271	1.32466	0.99177
Arid1a	1.2589	2.12311	1.76501
Arid2	1.14634	1.84483	1.27496
Arl2bp	1.27753	2.218	2.26377
Arl4d	1.4701	2.22159	3.41364
Arrdc1	0.909412	1.47418	2.1067
Atf4	1.44247	2.38049	2.36174
Atp2a3	1.5899	2.74516	2.35359
Atp5g3	1.48145	1.19969	1.15073
Atp5k	1.21148	0.462227	0.596809
Atp6ap1	1.39374	2.90203	3.50195
Atxn7	1.02815	1.55731	1.48411
B4galt1	1.17041	2.0831	2.76366
B4galt3	0.936065	1.46519	2.07358
BC005561	0.827577	1.34682	1.81699
Bcl2l1	1.4182	1.78949	2.54461
Birc2	1.11032	1.83115	1.55191
Blmh	1.18429	1.89695	2.1173
Bmpr2	1.45489	4.62075	2.12543
Bola2	1.04358	0.611417	0.933197
Brd3	1.1888	1.45471	1.35512
Brd4	1.27329	1.82285	1.37552
Brd7	1.26763	1.42976	1.25788
Brms1	1.04064	1.89269	2.2572
Bst2	1.45456	2.28705	3.0808
C2cd2	1.22238	1.94863	1.52105
Cadm1	1.24563	2.03466	2.41681
Ccar1	1.30503	1.88754	1.31969
Ccdc28b	1.07257	1.50874	1.72305
Ccdc85b	1.43274	1.49306	2.79787
Ccpg1	1.05488	2.23856	1.68892
Cct8	1.36085	2.06381	2.28697
Cd24a	0.828868	2.24368	2.76507
Cdipt	1.34923	2.4539	2.40434
Cdk11b	1.25928	1.64021	1.41715
Cebpd	1.18976	1.38899	3.86898
Chchd2	1.3612	1.21075	2.77581
Chd7	1.18416	1.36697	1.03385
Chfr	1.02677	1.42465	1.06524
Cib1	1.12207	1.71281	2.23308
Cish	0.859	2.22427	2.82649
Cldn5	1.63582	7.46634	7.4134
Clec14a	1.43212	4.81819	5.13868
Clec1a	1.19845	3.53143	4.0064
Cog8	1.03212	1.50127	1.71448
Copz1	1.33518	2.28508	2.79508
Crip1	1.3977	1.63318	2.32172
Ctdsp2	1.4198	2.30481	1.37778
Ctsc	0.988935	1.85967	1.93457
Ctsd	1.36426	3.2507	4.20412
D17H6S53E	1.01064	1.49211	1.56116
D17Wsu92e	1.33086	1.75183	1.32292
Daam1	1.10899	1.71117	1.35021
Dbndd2	1.06799	1.83708	2.08922
Dcaf13	1.02534	1.87689	2.28056
Dcp2	1.10185	1.33528	0.89925
Ddah2	1.39538	2.18364	3.06148
Dhrs7b	1.03897	1.75103	2.33945
Dnajc1	1.0925	1.29049	1.72863
Dnajc7	1.32455	2.0083	2.21752
Dusp23	0.956646	1.5468	2.05941
Dync1h1	1.48027	2.15047	1.61019
Dync1i2	1.4686	1.53822	0.894664
Edc4	1.0611	1.88526	1.54661
Efnb1	1.20061	1.40729	1.74429
Egfl7	1.63167	4.49285	5.47448
Egln2	1.10161	1.31277	2.14651
Ehd4	1.54299	4.31496	4.47985
Eif2ak2	1.02128	1.69595	1.88657
Eif2b4	1.08521	1.59322	1.94355
Eif2s3x	0.672676	0.37451	0.867558
Eif5b	1.56228	1.53674	1.36918
Elk4	1.24112	1.53335	1.40641
Eln	1.31306	1.55711	1.69795
Eml4	0.972063	1.29855	1.28485
Emp2	1.63085	3.40558	4.48937
Epas1	1.66027	5.80924	4.15027
Erp29	1.29593	1.86561	2.65625
Etfb	0.993797	2.01656	2.36297
Fam114a2	1.17877	1.8829	1.99517
Fam53a	1.03912	1.48526	1.99899
Foxp1	1.51111	2.90194	3.30938
Frg1	1.32398	2.11121	1.70649
Gata2	1.38144	2.25218	2.37728
Gfod1	1.10032	1.81126	1.2194
Gigyf1	1.0451	0.733172	0.469093
Gimap1	1.22363	1.8227	3.06838
Gja4	0.993341	3.19595	4.24396
Glrx5	1.3334	1.84422	2.3324
Gm12216	0.678256	1.54104	1.74035
Gon4l	1.02068	1.18512	0.69265
Gpaa1	1.06678	2.04894	2.52925
Gpx4	1.01685	0.865139	2.48538
Grrp1	1.20174	1.47796	2.52826
Guk1	1.14429	2.13987	2.91722
Gxylt1	1.09076	1.69784	1.70837
H2afv	1.18907	2.08224	2.11714
Hbs1l	1.09039	1.59527	1.25823
Hdac4	1.05363	0.784923	1.0218
Hdac7	1.39539	2.23796	1.39333
Hdgf	1.46609	1.67293	1.79421
Hey1	1.28987	2.56955	3.00875
Hilpda	1.298	3.53428	4.96385
Hint2	1.08106	1.36619	1.55766
Hnrnpm	1.45673	1.65172	1.65946
Hs3st1	1.07002	2.24046	3.63127
Hsp90aa1	1.28235	0.865192	1.92517
Hsp90b1	1.62523	3.12022	2.96757
Ifngr2	1.10159	1.86281	1.80298
Ifrd1	1.16681	2.02045	1.33225
Ift52	0.921335	1.95627	1.6402
Ikbip	1.03382	1.52712	2.01278
Il17rc	0.881248	1.25607	2.07901
Il17rd	1.10704	1.93047	1.53144
Il3ra	1.25966	1.1883	1.34129
Inpp5d	1.21401	1.45593	1.31658
Irf1	1.33453	2.52716	3.10658
Itga3	1.08738	2.75695	1.9474
Itpr2	1.26589	1.92641	1.4917
Itpripl2	1.29754	1.75557	1.39103
Jun	1.22707	2.48701	5.03463
Junb	1.03752	1.28226	3.52071
Kctd2	1.15242	1.93967	1.94261
Kdm6b	1.03069	1.03999	1.23605
Kif13a	1.21315	1.67518	1.53597
Klf2	1.58805	1.88483	3.07945
Klf7	1.31346	1.75156	2.38536
Klhl5	1.29189	2.6813	2.3607
Lamtor2	1.20909	1.38943	1.79367
Larp4b	1.39564	1.56221	1.64749
Lars2	1.83993	2.08455	1.58398
Lcp1	1.10089	2.14962	1.28798
Ldlrap1	1.13253	1.17288	1.61846
Lgmn	1.1185	2.33105	1.99542
Lias	1.05221	1.61889	2.00818
Llgl1	1.07439	1.7049	1.36092
Lpcat1	1.21441	1.49168	1.81123
Lrp4	1.00499	1.26701	1.91081
Lrrc32	1.14952	2.43072	2.2755
Luc7l3	1.41081	1.94507	1.36312
Lysmd2	1.15206	2.62188	2.94347
Maml2	1.16886	1.52482	1.23305
Mapk3	1.42514	2.59857	1.92792
Mdp1	1.13066	2.46633	2.10269
Med19	1.10578	1.64857	0.828027
Med28	1.21507	1.99565	2.61105
Megf6	1.08686	1.44097	1.89285
Mms19	1.10006	1.54927	1.37867
Morf4l1	0.977937	0.497809	1.20884
Mrpl17	1.10118	2.11816	2.3535
Msl1	1.37319	1.83054	1.25888
Mum1	1.15238	1.42907	2.18544
Mxra7	1.31476	1.78528	2.10124
Mycbp	0.942358	1.44767	1.33597
Mycbp2	1.25672	1.71027	1.07504
Myl6	1.45754	1.11132	3.63559
Ncoa6	1.10852	1.40472	1.37219
Ndufa3	1.31716	1.02854	1.0906
Ndufa5	1.3019	1.418	1.36227
Ndufb3	1.15962	1.15742	1.47204
Ndufb7	1.34345	1.32413	1.8945
Nenf	1.22267	1.56989	1.92223
Nfkbia	1.54616	2.46086	4.85941
Ngdn	1.1892	1.8026	2.23002
Ngrn	1.06173	2.31812	2.60315
Nhlrc2	0.931811	2.53826	2.83191
Nkd1	1.24832	2.40137	3.08023
Nme1	1.14606	1.81464	2.03885
Nova2	1.24554	1.31589	0.954514
Npm1	1.25102	1.33853	2.23983
Nr2f6	1.07789	1.4274	1.84165
Ntn1	1.21792	2.00352	1.63454
Nudt16l1	1.14609	2.25372	2.73009
Nudt3	1.30638	1.11295	2.00189
Nup50	1.06161	1.55285	1.61524
Ogfr	1.21889	1.37604	2.13692
P2rx4	0.995049	2.43176	2.57083
Pabpn1	1.07162	1.01756	0.912979
Pak4	0.963483	1.71969	1.75878
Pard3	1.08457	1.35094	1.28758
Pbxip1	1.21878	1.91981	1.92861
Pdcd5	0.802736	0.678695	1.56175
Pdia6	1.38412	2.2658	3.38521
Pex6	1.24297	1.58043	1.6767
Pfdn2	1.21827	1.05146	1.15776
Pfdn5	1.13609	1.37141	2.09409
Phactr1	1.33731	1.88064	1.95171
Phc2	1.32575	1.47603	2.09319
Phf1	1.1021	1.61151	1.45647
Phf14	1.25475	1.51498	0.872359
Phf20l1	1.13755	1.80818	1.38901
Phip	1.00798	1.75665	1.10687
Pigyl	0.96887	1.27286	1.65014
Pkig	1.15349	1.56704	1.8304
Pla2g12a	0.987586	1.42978	2.11849
Plaa	1.11911	1.86588	1.38802
Plaur	0.991259	1.98293	2.69662
Plcb3	1.17795	1.39831	1.4341
Plekha2	1.27584	2.3372	1.85822
Plscr3	1.25466	2.29983	1.83318
Plxna1	1.14726	2.70843	1.40727
Polr2l	0.812133	0.577494	0.744995
Polr3gl	1.10021	1.569	1.41333
Pomp	1.35589	1.93707	2.48024
Ppie	1.08896	1.71581	2.46067
Ppp1r12a	1.26238	1.42354	1.15741
Ppp1r15a	1.07762	1.70142	2.44771
Prkar2a	1.21296	1.78273	1.24579
Prkce	1.31194	1.5598	1.14553
Prr13	1.27931	1.91502	2.17961
Prrc2a	1.35247	1.31346	0.681969
Psen2	1.10775	1.73089	2.94116
Psmb1	1.3293	2.14356	2.82701
Psmb10	1.482	1.86101	3.19033
Psmb3	1.02234	0.765394	2.54159
Psmb4	1.40621	2.21567	2.40846
Psmd1	1.37136	1.7128	1.81749
Psmd13	1.35527	1.96944	2.5649
Psmd2	1.32419	1.55958	2.07534
Psmd4	1.39428	2.11993	2.63486
Psmd9	1.08217	1.71046	2.43444
Ptges3	1.19854	0.963216	1.91868
Ptgfrn	1.38902	2.54385	1.30291
Ptprk	1.14203	2.24326	1.47645
Pttg1	1.33269	2.2472	2.2716
Pygo2	1.25111	1.53236	1.09113
Qsox1	1.42231	1.73947	2.60808
Ralbp1	1.46623	1.56977	1.68999
Ramp2	1.4969	5.20218	5.77973
Rangap1	1.22126	1.60651	1.57593
Rapgef4	1.17224	1.40516	0.705325
Rara	1.0443	1.13514	0.825384
Rasip1	1.55846	2.37821	2.60768
Rassf1	1.20969	2.14432	2.60418
Rbm10	0.987529	1.01001	1.39437
Rbm17	1.16538	1.48713	1.88524
Rbm6	1.10374	1.52691	1.12631
Rbm8a	1.20724	1.42949	1.89532
Rcc2	1.20837	1.39274	1.16654
Rgl2	1.22151	1.67267	1.50848
Rgs12	1.24741	2.60669	2.48473
Rhoj	1.26824	2.23053	2.95223
Ripply3	1.17289	2.5216	3.43528
Rnf141	1.2193	0.821554	1.49059
Rnf8	0.885591	1.39804	2.11415
Rp9	1.07892	1.58684	1.3201
Rpl14	1.1375	0.495484	2.40715
Rpl27a	1.07406	1.38301	1.32329
Rpl35a	1.01095	0.532361	0.962629
Rpl37	0.547082	0.201752	1.33028
Rpl41	1.14822	0.353746	2.45203
Rplp1	1.36275	0.934334	1.88766
Rplp2	1.22387	0.504667	1.43677
Rpn1	1.40264	2.39416	2.12944
Rps10	0.877211	0.3812	1.697
Rps14	1.41169	1.43806	3.04091
Rps18	1.20201	0.332341	2.81662
Rps21	1.32872	0.341357	0.827353
Rps24	1.20012	0.776953	1.77136
Rps26	1.18008	0.493733	1.29096
Rps8	1.17397	0.298835	1.59956
Rps9	1.52188	1.36735	2.76162
Rsl24d1	1.07422	1.18071	1.34695
Rtf1	1.32856	1.32656	1.16518
S100a13	1.40198	1.27967	1.64529
S100a16	1.59423	2.97899	4.13795
Sap30l	1	1	1
Sbno2	0.998565	1.40154	1.44084
Scand1	1.10558	0.616749	0.807786
Scnm1	1.04509	1.362	2.12523
Sdf2	1.15077	1.82837	2.54285
Sec61b	1.03258	0.83099	1.73622
Sec62	1.67847	1.79984	1.5053
Sema3c	1.35207	3.72545	2.99182
Sema3g	1.50454	1.7937	1.77612
Sertad1	1.22601	2.16407	2.98156
Sf3a3	1.13747	1.87009	2.25278
Sh3pxd2a	1.28275	1.49953	1.2097
Skap2	1.21654	1.59422	2.55831
Slc16a9	1.05005	2.25111	1.8163
Slc35e4	1.04118	1.94713	2.53041
Smad6	1.19793	1.73449	1.86887
Smarca2	1.35717	2.72864	2.34459
Smarcd2	1.28155	1.44546	1.69881
Snrnp70	1.40593	0.86817	0.792699
Snrpb2	1.14209	1.26271	1.1172
Snrpd1	1.15788	1.27288	1.56282
Snrpe	1.09478	1.05459	1.5259
Son	1.46097	2.59299	1.60061
Sox4	1.23796	0.998212	1.60584
Sppl3	1.26882	1.97313	2.14838
Srgap1	0.955416	1.43543	1.19488
Srp9	1.17973	1.28028	1.85572
Ss18	1.11708	1.56172	1.36765
Ssh2	1.21954	2.0391	1.86279
St5	1.1872	1.96675	1.36225
Stk4	1.07786	2.24541	1.6524
Stub1	1.24402	1.50802	2.48339
Stx3	1.1254	2.14445	1.91104
Syngr2	1.15231	2.41807	3.12829
Taf3	1.19658	1.53175	1.89199
Taldo1	1.25461	1.60114	2.63673
Tap1	1.15449	2.219	2.19818
Tap2	1.39004	1.90602	2.44495
Tardbp	1.2979	1.7735	1.51097
Tbx3	1.14855	2.25399	2.12388
Tet3	1.24357	1.81911	1.48558
Thap3	0.949579	1.39674	1.74394
Tkt	1.28767	2.1835	2.03848
Tmcc1	1.06598	1.66592	1.51867
Tmem100	1.20901	4.79272	6.23941
Tmem160	1.13653	0.841342	1.76236
Tmem176a	1.07667	3.05676	3.82789
Tmem208	1.05135	1.61666	2.19694
Tmem44	1.14482	2.14209	2.28055
Tnfsf12	1.04627	1.03127	0.444498
Tnrc18	1.16495	0.89744	0.584327
Tnrc6a	1.24451	1.383	0.917084
Tnrc6c	1.16355	1.2237	1.24824
Tor1b	1.09988	2.12542	2.11532
Tpm3	1.28932	1.20444	2.94499
Trabd	1.1118	1.7576	1.64102
Trappc4	1.20378	1.97291	2.78371
Trim8	1.20123	1.78151	1.64134
Trnau1ap	1.10744	2.06625	2.21118
Trp53i13	0.929787	1.69465	2.71834
Tsc22d3	1.48583	1.9246	2.64365
Tsen34	1.14358	1.57021	2.85808
Tspan14	1.22703	2.33898	2.41306
Tspan18	1.07507	3.34845	3.10351
Tuba1b	1.22036	1.05384	3.18022
Txnl4a	1.24102	2.01882	2.51378
Ube2j2	1.04179	0.757295	1.2694
Ubn2	1.2257	1.66426	1.67828
Ucp2	1.30462	2.68645	3.31262
Upf3b	1.167	1.54341	1.30235
Usf1	1.29694	1.54861	2.08032
Usf2	1.02679	1.09977	1.13138
Wdr45	0.944299	1.88663	2.35954
Xpot	1.09473	1.53244	1.39413
Zbtb20	1.42664	1.51421	1.7934
Zbtb4	1.31462	1.87834	1.48257
Zbtb46	1.19798	1.04503	1.38117
Zbtb7a	1.25467	1.05625	1.4049
Zfhx3	1.15553	1.36767	1.21049
Zfp503	1.06246	1.38869	0.733129
