# Supplementary material for: Endothelial heterogeneity across distinct vascular beds during homeostasis and inflammation
Source: eLife journal article supplement (doi:10.7554/elife.51413), 2020-01-16
Supplement: supp [file elife-51413-supp-v1.zip › elife_poa_e51413_Supplementary_file_9.xlsx]

## Sheet: Fold Change versus Sap30l for R
	RiboTag FC versus Sap30l	Tabula Muris FC versus Sap30l
Adam17	1.22193	1.87135
Arsa	1.19853	2.24934
AW112010	1.37084	3.66567
Casp7	1.15327	1.87878
Cav1	1.78788	6.83419
Cav2	1.59163	3.73048
Ccnd1	1.5636	3.24711
Cd274	1.15351	2.41761
Cdc42ep1	1.38846	3.22428
Ceacam1	1.00815	3.31085
Cmpk2	1.28378	2.93676
Col4a1	1.71712	3.54477
Col4a2	1.62128	3.68893
Crkl	1.02427	1.85227
Ctla2b	0.834379	2.44667
Cyb5r1	1.22573	2.92637
Cyyr1	1.30901	1.49447
Dach1	1.20965	1.10572
Dchs1	1.15827	1.01888
Ddx21	1.17393	1.04471
Dennd5a	1.41596	1.53065
Dhrs3	1.33109	4.34427
Dtx3l	1.1537	1.56108
Dysf	1.36328	1.61488
Ecscr	1.35164	3.3853
Ehd2	1.63877	4.42163
Emcn	1.50991	4.67795
Eng	1.64494	5.72149
Etfdh	1.14896	2.46199
Ets2	1.51855	2.4818
Exoc6	1.18463	1.71827
Fli1	1.33371	2.43929
Gas6	1.52342	3.43924
Gbp9	1.22849	2.47919
Ggta1	1.33844	2.33614
Gimap4	1.42122	3.08599
Gimap6	1.4954	4.3523
Gngt2	1.28712	2.24509
Gusb	1.15494	2.56521
H2-T24	1.11334	2.51651
Idh2	1.38031	2.86927
Ifi203	1.25042	1.73236
Ifi44	1.16562	2.52663
Ifih1	1.17646	2.19155
Ifngr1	1.42214	3.44059
Igf2r	1.26418	1.10919
Iigp1	1.29466	2.95839
Ilk	1.27448	2.76391
Itga6	1.50776	2.5341
Itpripl1	1.19923	3.14153
Jam2	1.52637	4.2497
Kdr	1.66957	4.6332
Kitl	1.57839	2.94203
Klhl24	1.21279	1.95115
Ktn1	1.2745	1.36866
Lama4	1.40851	2.50498
Lamc1	1.39241	1.76112
Lims2	1.50293	5.33977
Lipa	1.20447	2.53997
Litaf	1.24121	2.91446
Ltbp4	1.59721	3.21187
Map3k3	1.12689	1.90255
Mgll	1.72732	5.76035
Mmrn2	1.4577	3.3619
Mndal	1.15508	1.74868
Mrrf	1.0058	2.49823
Myl12a	1.5164	4.67015
Myo1c	1.43723	2.02207
Nck1	1.37173	2.58489
Ndel1	1.27819	3.00921
Pcdh12	1.31788	1.9314
Pdgfd	1.2329	2.05135
Plod1	1.38476	3.48104
Plscr2	1.18815	3.14562
Plxnd1	1.49106	1.25175
Ppic	1.29787	2.98512
Prkch	1.3546	2.33553
Ptp4a3	1.36104	3.20632
Ptprm	1.34845	2.15742
Rassf9	1.21697	2.35005
Rnf130	1.35647	2.80973
Rps27l	1.14798	1.57835
Rps6ka2	1.08896	1.63201
S100a10	1.47844	2.64572
Samd9l	1.23123	1.66281
Sap30l	1	1
Scarb1	1.30489	3.46918
Sgk1	1.46551	4.79633
Sh2b3	1.29328	1.71311
Sh2d3c	1.30836	3.27041
Smpdl3a	1.27149	3.45377
Smtn	1.30902	2.59023
Sox7	1.35731	2.07647
Sparc	1.81186	6.69545
Tgtp2	0.886912	2.71053
Tie1	1.58899	3.52636
Tinagl1	1.50434	4.74177
Tmem123	1.37107	2.74356
Tmem140	1.301	1.88074
Tmem71	1.05361	2.20285
Tmem88	1.37569	4.27623
Tpm1	1.61549	2.94042
Tspan12	1.31156	3.03361
Uba7	1.08709	2.26009
Usp25	1.22899	1.78295
Vim	1.70528	3.67483
Wasf2	1.39884	2.24946
Wdsub1	1.02282	2.04693
Wwtr1	1.39645	2.93626
Xdh	1.49587	2.85945
Zfp36l2	1.16794	0.617043
