# Supplementary figures and images for: Endothelial heterogeneity across distinct vascular beds during homeostasis and inflammation
Source: eLife journal article supplement (doi:10.7554/elife.51413), 2020-01-16

A

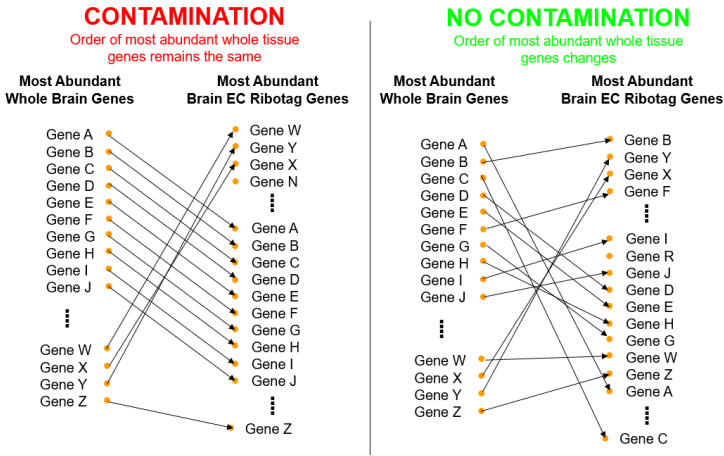

B

Figure 1 – Figure Supplement 5

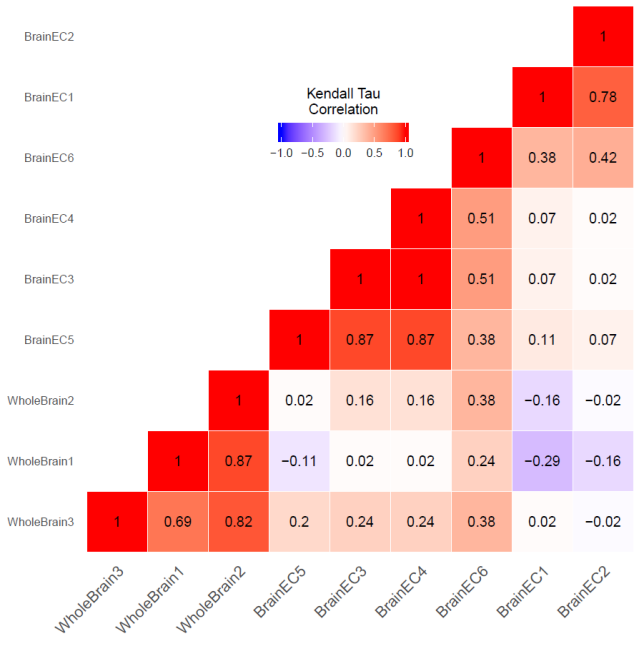

C

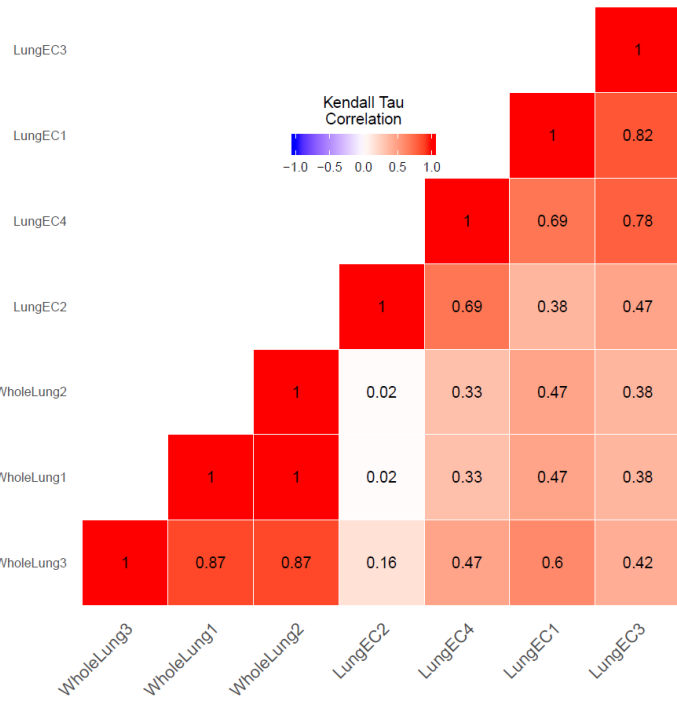

D

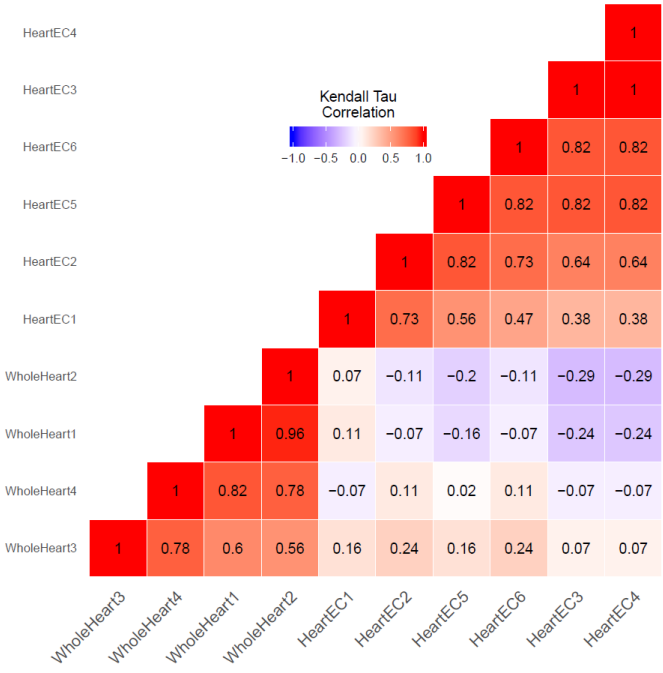

Supplement: supp [file elife-51413-supp-v1.zip › elife_poa_e51413_Figure_1_figure_supplement_5.pdf]

Figure 1 – Figure Supplement 1

A

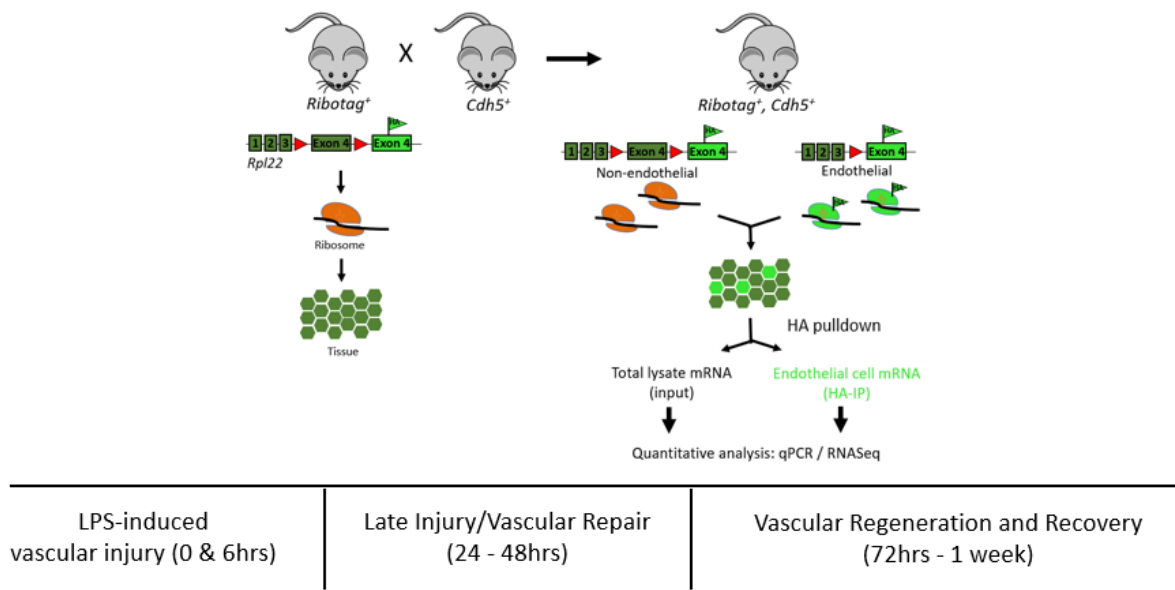

B

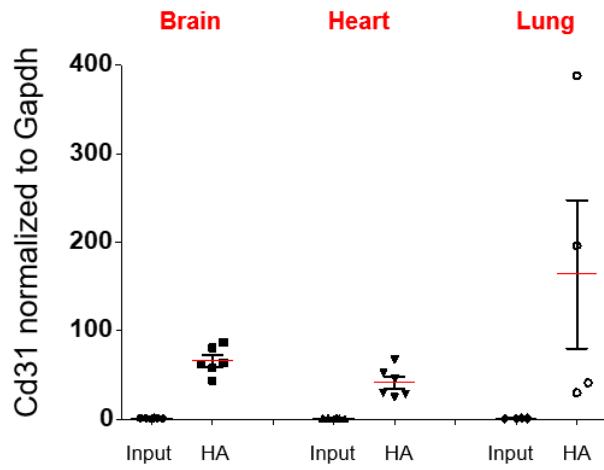

C

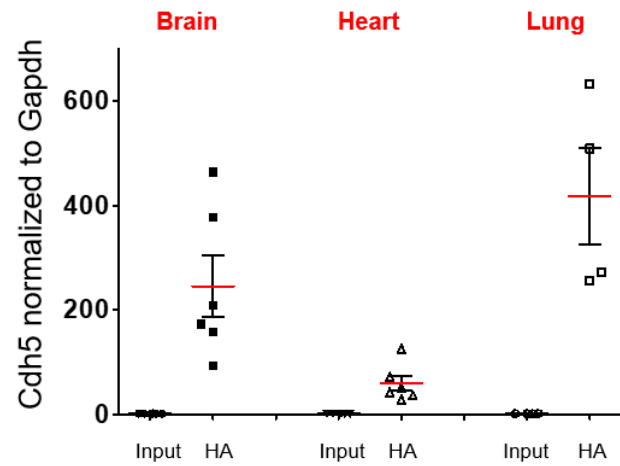

D

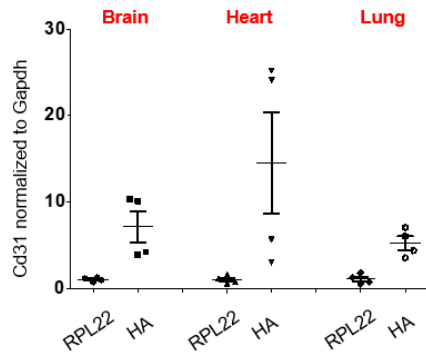

E

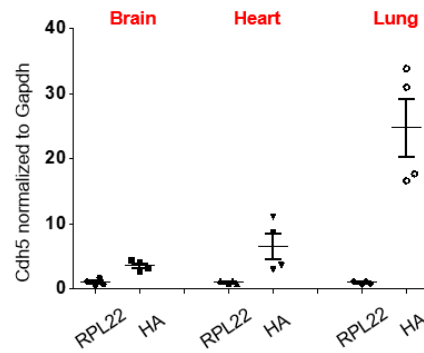

F

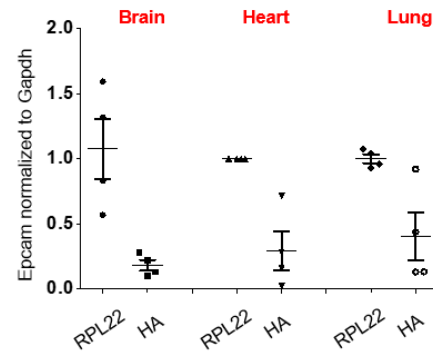

Supplement: supp [file elife-51413-supp-v1.zip › elife_poa_e51413_Figure_1_figure_supplement_1.pdf]
